# Supplementary material for: The fungal pathogen Cryptococcus neoformans adapts to the host environment through TOR-mediated remodeling of phospholipid asymmetry
Source: Research Square preprint supplement (doi:10.21203/rs.3.rs-2828872/v1), 2023-04-25
Supplement: Supplementary file 1 [file 2b5675794757d7ad372acd01.pdf]

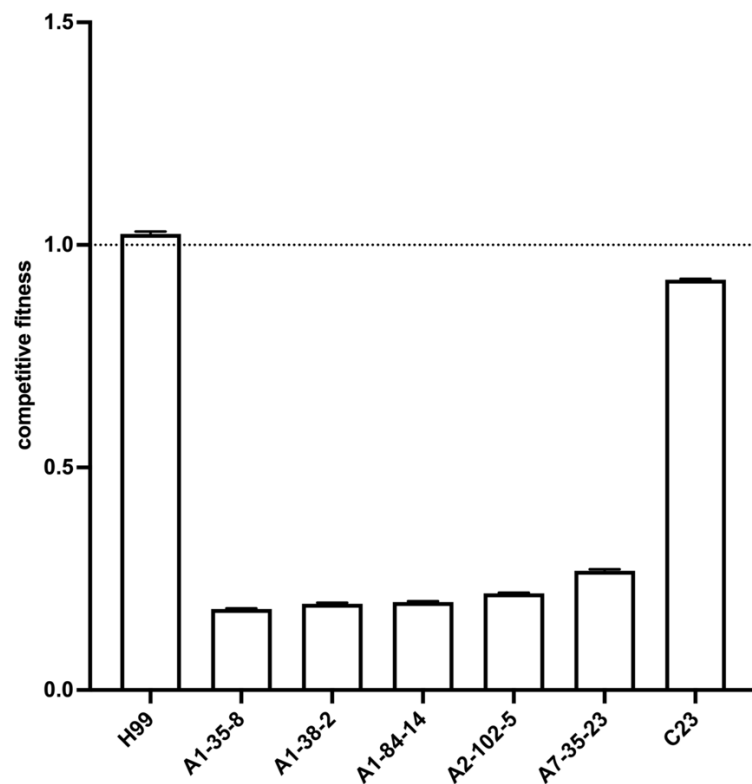

Figure S1

### Competition assay replicates phenotypes of CO<sub>2</sub>-sensitive strains

Overnight cultures of mNeon-Green labeled H99 and CO<sub>2</sub>-tolerant or CO<sub>2</sub>-sensitive strains were combined in a 1:1 ratio and incubated at 30°C for 24 hrs in ambient air or with 5% CO<sub>2</sub>. Cell populations were characterized by flow cytometry and the percentage of mNeonGreen negative cells in 5% CO<sub>2</sub> normalized to those in ambient conditions to determine a competitive fitness score for each mutant strain as indicated.

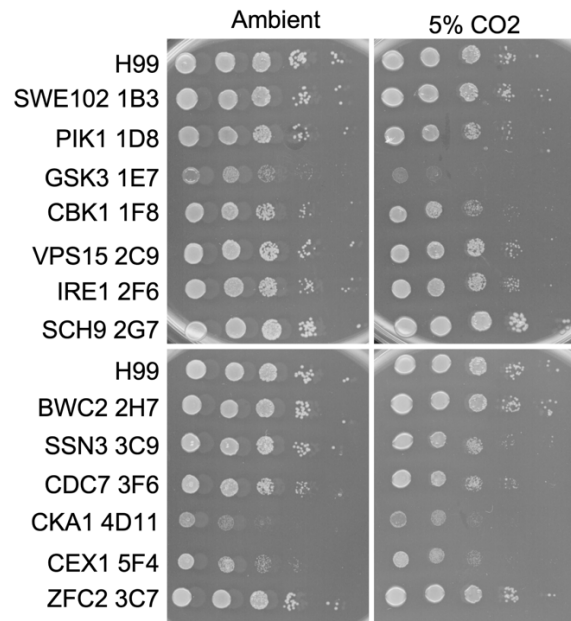

Figure S2

### Spot dilution assay confirms competition assay phenotypes

Ten-fold serial dilutions from overnight cultures of indicated strains (plate location from kinase or transcription factor deletion library indicated) were spotted on solid RPMI medium with 165 mM MOPS, pH 7 at 30°C in ambient air or at 5% CO<sub>2</sub> for 48 hrs before images were acquired.

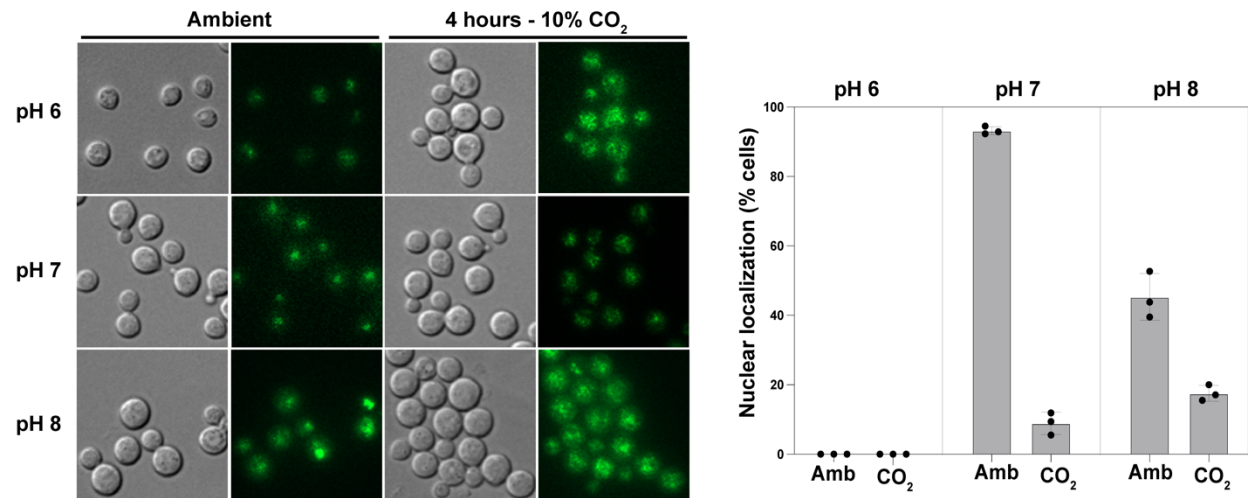

Figure S3

### Rim101 delocalized under elevated CO<sub>2</sub> concentrations

Overnight cultures of H99 + RIM101-GFP were washed twice with water before plating  $\sim 2 \times 10^8$  cells on RPMI solid medium buffered with MOPS to pH 6, 7, and 8, and incubated for 4 hrs with or without 10% CO<sub>2</sub>. Cells were swabbed onto a slide before imaging. A minimum of 200 cells were scored for each condition for enriched nuclear localization or diffuse fluorescence throughout the cell.

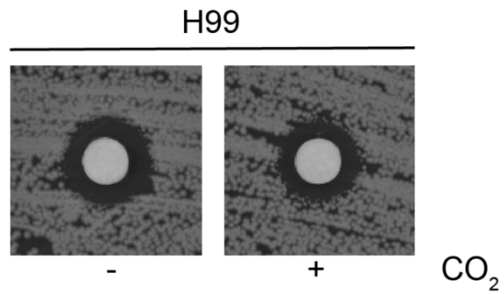

Figure S4

**CO<sub>2</sub> exposure does not affect sensitivity to the IPC targeting antifungal aureobasidin**

Cells from overnight cultures of H99 were spread on RPMI 1640 medium with 165 mM MOPS, pH 7. Sterile disks were placed on plates and 100 µg aureobasidin was added to each disk. Cells were incubated at 30°C for 48 hrs in ambient air or 5% CO<sub>2</sub> before images were acquired.

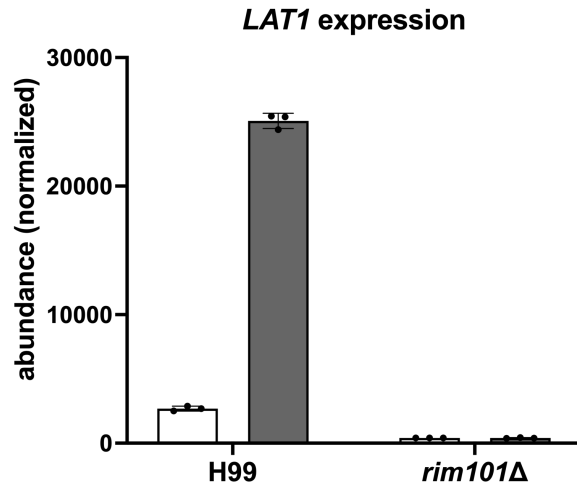

Figure S5

***LAT1* expression reduced under ambient air and CO<sub>2</sub> conditions in CO<sub>2</sub> resistant mutant *rim101Δ***

H99 and *rim101Δ* strains were cultured in RPMI 1640 medium with 165 mM MOPS, pH 7 for 24 hrs at 37°C in ambient air or 5% CO<sub>2</sub>. Total RNA was isolated from harvested cells, 100 ng of RNA was hybridized to a custom Nanostring probe set and quantified on a Nanostring Sprint nCounter. Normalized Nanostring counts from total RNA for LAT1 in ambient (white bars) or 5% CO<sub>2</sub> conditions (gray bars) displayed.

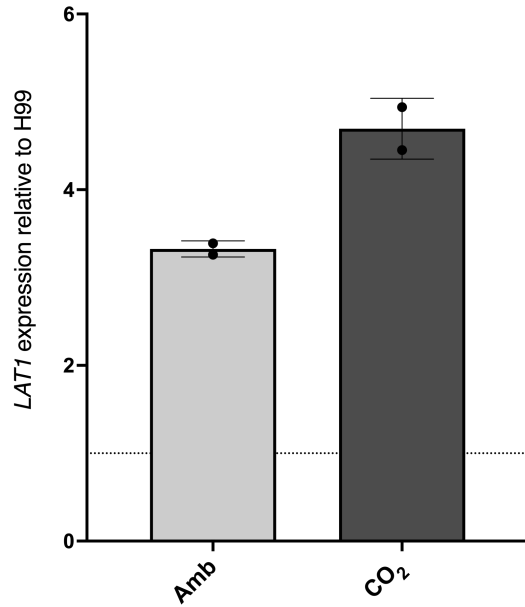

Figure S6

**Basal expression of *LAT1* is increased under histone 3 promoter compared to H99**

Overnight cultures of H99 and P<sub>H3</sub>:*LAT1* were washed and diluted to 7.5x10<sup>5</sup> cells/ml and cultured in RPMI 1640 medium with 165 mM MOPS, pH 7 for 4 hr at 37°C in ambient air or 5% CO<sub>2</sub>. *LAT1* gene expression was measured from total RNA and normalized to actin expression. P<sub>H3</sub>:*LAT1* normalized expression is displayed relative to H99 for each condition. Measurements were performed in technical duplicates with biological triplicates.

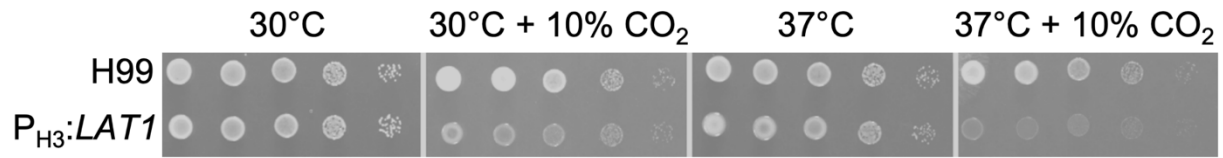

Figure S7

**Constitutive expression of *LAT1* increases sensitivity to CO<sub>2</sub>**

Ten-fold serial dilutions from overnight cultures of indicated strains were spotted on solid RPMI medium with 165 mM MOPS, pH 7 at 30°C or 37°C in ambient air or at 10% CO<sub>2</sub> for 48 hrs before images were acquired.

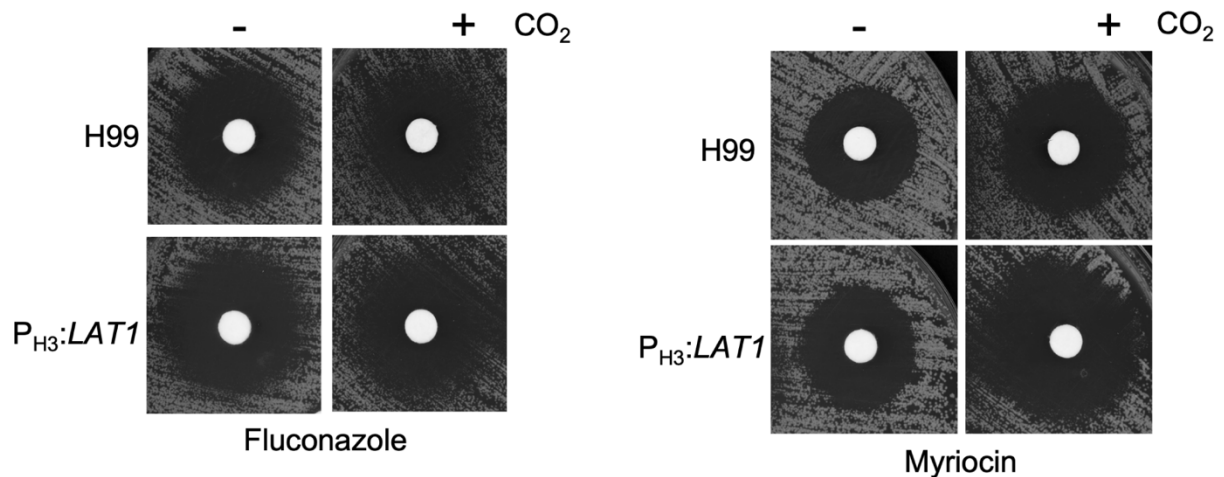

Figure S8

**Constitutive expression of *LAT1* increases sensitivity to myriocin, not fluconazole**

Cells from overnight cultures of H99 and  $P_{H3}::LAT1$  were spread on RPMI 1640 medium with 165 mM MOPS, pH 7. Sterile disks were placed on plates and 40  $\mu$ g fluconazole or 8  $\mu$ g myriocin was added to each disk. Cells were incubated at 30°C for 48 hrs in ambient air or 5%  $CO_2$  before images were acquired.



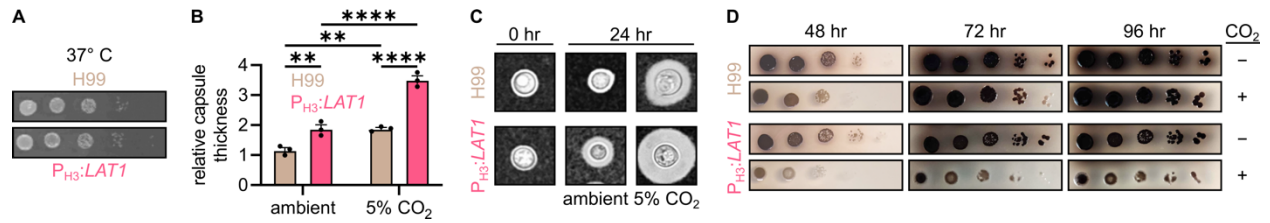

Figure S9

**Constitutive expression of *LAT1* does not induce defects in survival at host temperature, ability to form capsule, or melanin production**

A) Ten-fold serial dilutions from overnight cultures of indicated strains were spotted on solid RPMI medium with 165 mM MOPS, pH 7 at 37°C in ambient air or at 5% CO<sub>2</sub> for 48 hrs before images were acquired. B&C) Indicated strains were grown in RPMI 1640 +165 mM MOPS for 24 hours at 37°C in ambient air or 5% CO<sub>2</sub>, then prepared for microscopy by counterstaining with India ink. At least 50 cells were quantified per condition and processed in ImageJ software to measure capsule. Capsule thickness at 24 hours was normalized to 0 hour. Two-way analysis of variance (ANOVA) with Tukey's multiple comparisons tests was performed in GraphPad Prism. \*\*, P < 0.01, \*\*\*\*, P < 0.0001. D) Washed cells from overnight cultures were spotted on melanin-inducing agar medium and incubated at 30°C in ambient air or 5% CO<sub>2</sub> before imaging at indicated time points.
