# Supplementary material for: The fungal pathogen Cryptococcus neoformans adapts to the host environment through TOR-mediated remodeling of phospholipid asymmetry
Source: Research Square preprint supplement (doi:10.21203/rs.3.rs-2828872/v1), 2023-04-25
Supplement: Supplementary file 1 [file 1306bb65033b72237247d344.xlsx]

## Sheet: 4_hour_C02_vs_Amb
CNAG_XXXXX	baseMean	log2FoldChange	lfcSE	stat	pvalue	padj
CNAG_03307	85.5423	-1.39864	0.334848	-4.17695	2.95438e-05	0.00692976
CNAG_12992	189.947	-1.38458	0.304818	-4.54232	5.56383e-06	0.00224868
CNAG_13130	30.7119	-1.33952	0.319431	-4.19346	2.74731e-05	0.00684681
CNAG_12346	182.5	-1.30712	0.235724	-5.54511	2.93774e-08	3.90475e-05
CNAG_12883	102.964	-1.22301	0.44294	-2.76112	0.00576037	0.15593
CNAG_12299	28.7512	-1.15342	0.335354	-3.4394	0.000583007	0.0451406
CNAG_12832	878.843	-1.11299	0.306355	-3.63302	0.000280121	0.0319138
CNAG_05885	455.693	-1.11291	0.322283	-3.45321	0.000553952	0.0446239
CNAG_04245	7495.37	-1.05831	0.152302	-6.94875	3.68538e-12	1.46954e-08
CNAG_05466	39.7956	-1.03877	0.338877	-3.06532	0.00217437	0.0958044
CNAG_04183	14310.1	-1.02215	0.116968	-8.73869	2.3583e-18	1.88074e-14
CNAG_13167	141.827	-1.02186	0.388179	-2.63245	0.0084771	0.185219
CNAG_12111	69.2794	-1.01715	0.396069	-2.56811	0.0102253	0.20614
CNAG_05916	707.153	-1.01572	0.369074	-2.75208	0.00592177	0.158477
CNAG_03454	1849.02	-1.01326	0.306572	-3.30513	0.000949313	0.0596124
CNAG_13106	172.221	-0.999325	0.273991	-3.64729	0.000265016	0.0312955
CNAG_05832	7.75053	-0.955297	0.485155	-1.96906	0.0489468	NA
CNAG_07840	61.1431	-0.94113	0.448252	-2.09956	0.035768	0.357008
CNAG_13194	170.346	-0.932146	0.459327	-2.02937	0.0424204	0.37968
CNAG_07853	238.422	-0.923817	0.286677	-3.2225	0.00127076	0.0739731
CNAG_04154	121.117	-0.916074	0.327586	-2.79644	0.00516697	0.149493
CNAG_12900	369.208	-0.913704	0.174042	-5.24989	1.52191e-07	0.000121372
CNAG_12984	56.8167	-0.906818	0.257236	-3.52524	0.000423096	0.0396963
CNAG_04865	658.249	-0.905869	0.248362	-3.64738	0.000264933	0.0312955
CNAG_09002	46.4856	-0.904544	0.447463	-2.0215	0.0432285	0.383906
CNAG_12558	192.609	-0.902779	0.328577	-2.74754	0.00600436	0.159432
CNAG_12464	2.23922	-0.898174	0.413821	-2.17044	0.0299734	NA
CNAG_06105	717.435	-0.881968	0.172695	-5.10709	3.27165e-07	0.000237195
CNAG_03193	450.92	-0.879865	0.162272	-5.42215	5.88864e-08	6.70884e-05
CNAG_04027	13170.7	-0.878356	0.205962	-4.26465	2.00211e-05	0.00532228
CNAG_13016	54.1731	-0.876457	0.360772	-2.42939	0.0151241	0.240748
CNAG_09009	306.446	-0.87644	0.405122	-2.1634	0.0305104	0.33015
CNAG_12315	454.141	-0.871538	0.397963	-2.19	0.0285243	0.319496
CNAG_04975	96.9572	-0.867607	0.351241	-2.47012	0.0135069	0.232652
CNAG_12043	60.4651	-0.864865	0.296022	-2.92162	0.00348216	0.125091
CNAG_00865	15.8035	-0.864419	0.445731	-1.93933	0.0524611	0.417706
CNAG_00487	953.372	-0.864162	0.172648	-5.00535	5.57606e-07	0.000347269
CNAG_06958	4.63904	-0.863655	0.481998	-1.79182	0.0731614	NA
CNAG_13204	240.133	-0.841206	0.299374	-2.80988	0.00495599	0.146385
CNAG_06395	15.623	-0.839469	0.471195	-1.78157	0.0748189	0.469517
CNAG_12198	199.102	-0.839424	0.247614	-3.39005	0.000698786	0.0497573
CNAG_02300	10474.8	-0.839388	0.195136	-4.30155	1.69604e-05	0.00520227
CNAG_12494	28.8645	-0.834956	0.31958	-2.61267	0.00898387	0.191057
CNAG_05940	8574.81	-0.828986	0.191879	-4.32036	1.55778e-05	0.0049693
CNAG_03179	78.8136	-0.802784	0.474201	-1.69292	0.090471	0.497231
CNAG_12833	74.4045	-0.797309	0.340776	-2.33969	0.0192997	0.267284
CNAG_02169	524.217	-0.780445	0.218462	-3.57245	0.000353653	0.036467
CNAG_12450	344.014	-0.777702	0.272269	-2.85637	0.00428515	0.137245
CNAG_07527	308.841	-0.776991	0.239581	-3.24312	0.00118228	0.0718849
CNAG_05002	66.9005	-0.775653	0.400903	-1.93476	0.0530193	0.418269
CNAG_06504	53.6818	-0.76335	0.366581	-2.08235	0.0373104	0.364052
CNAG_04523	72.9703	-0.762554	0.326893	-2.33273	0.0196623	0.267284
CNAG_07949	738.585	-0.756769	0.184048	-4.1118	3.92586e-05	0.00869688
CNAG_12109	31.7771	-0.756113	0.402273	-1.8796	0.0601626	0.439695
CNAG_12183	692.364	-0.753662	0.341025	-2.20999	0.0271057	0.311108
CNAG_12483	85.7687	-0.752262	0.31213	-2.41009	0.0159487	0.245069
CNAG_12637	9.14296	-0.750086	0.470975	-1.59262	0.111245	0.533481
CNAG_06493	3736.46	-0.750043	0.333911	-2.24624	0.0246889	0.29645
CNAG_12199	258.346	-0.749823	0.297729	-2.51848	0.0117864	0.219052
CNAG_04626	615.274	-0.740073	0.22306	-3.31782	0.000907217	0.0583473
CNAG_07683	210.138	-0.734839	0.275719	-2.66517	0.0076949	0.17675
CNAG_06518	34.6637	-0.731198	0.335079	-2.18216	0.0290975	0.322293
CNAG_12213	23.4975	-0.724839	0.361153	-2.00702	0.044748	0.388742
CNAG_12235	204.001	-0.724425	0.405821	-1.78508	0.0742477	0.469213
CNAG_01945	150.585	-0.717097	0.365378	-1.96261	0.0496911	0.406161
CNAG_12401	163.92	-0.710164	0.306632	-2.31601	0.0205575	0.268731
CNAG_12801	2026.93	-0.709929	0.420312	-1.68905	0.0912091	0.497873
CNAG_07693	282.318	-0.706898	0.333921	-2.11696	0.034263	0.350767
CNAG_12559	110.065	-0.704133	0.292681	-2.40581	0.0161368	0.246438
CNAG_13004	153.585	-0.70186	0.257325	-2.72752	0.00638118	0.16218
CNAG_12142	332.439	-0.696131	0.271267	-2.56622	0.0102815	0.20614
CNAG_12214	155.793	-0.686725	0.2177	-3.15446	0.00160795	0.0835156
CNAG_07733	73.2706	-0.681891	0.29379	-2.32101	0.0202862	0.268532
CNAG_02815	19836.8	-0.670135	0.317805	-2.10863	0.0349761	0.353978
CNAG_05010	32.3779	-0.665965	0.359188	-1.85408	0.0637272	0.442217
CNAG_09012	54.5191	-0.663291	0.449044	-1.47712	0.139644	0.565185
CNAG_03617	9.6089	-0.662225	0.411133	-1.61073	0.107239	0.529938
CNAG_12996	176.033	-0.661038	0.209438	-3.15624	0.00159819	0.0835156
CNAG_13109	12.4611	-0.660051	0.467046	-1.41325	0.157583	0.584083
CNAG_09006	60.184	-0.656917	0.452717	-1.45105	0.146765	0.570955
CNAG_05732	1290.4	-0.655036	0.363803	-1.80052	0.0717778	0.464257
CNAG_12887	6.97068	-0.655007	0.478804	-1.36801	0.17131	NA
CNAG_00476	242.806	-0.652291	0.227638	-2.86548	0.00416383	0.135904
CNAG_12027	89.0979	-0.649218	0.412952	-1.57214	0.115918	0.539605
CNAG_04070	993.683	-0.648368	0.239945	-2.70216	0.00688912	0.168241
CNAG_07306	87.811	-0.642895	0.298926	-2.15068	0.0315013	0.33676
CNAG_12518	245.33	-0.640691	0.280824	-2.28147	0.0225206	0.283143
CNAG_09011	5.13046	-0.637856	0.484117	-1.31756	0.18765	NA
CNAG_13129	138.881	-0.636096	0.275358	-2.31007	0.0208842	0.270815
CNAG_12465	18.9691	-0.631229	0.457702	-1.37913	0.167856	0.595567
CNAG_02537	94.8895	-0.631061	0.270049	-2.33684	0.0194476	0.267284
CNAG_13117	339.489	-0.629096	0.312227	-2.01487	0.0439186	0.387017
CNAG_08017	48.8718	-0.629081	0.345957	-1.81838	0.0690061	0.455943
CNAG_03728	516.366	-0.622175	0.392951	-1.58334	0.113344	0.536458
CNAG_09010	15.9863	-0.621727	0.48358	-1.28567	0.198557	0.628734
CNAG_12770	14499	-0.62165	0.142449	-4.364	1.27704e-05	0.00424348
CNAG_04442	57.1528	-0.616206	0.294474	-2.09257	0.0363879	0.359598
CNAG_13137	21.2514	-0.612951	0.460581	-1.33082	0.183248	0.616105
CNAG_12061	35.1472	-0.609068	0.424127	-1.43605	0.150988	0.576965
CNAG_05075	26942.1	-0.609056	0.376813	-1.61634	0.106022	0.526806
CNAG_04486	417.087	-0.607099	0.179867	-3.37527	0.000737427	0.0512548
CNAG_12074	82.3667	-0.606024	0.370525	-1.63558	0.101927	0.518144
CNAG_05632	2670.18	-0.601114	0.273596	-2.19708	0.0280146	0.317342
CNAG_06771	681.906	-0.596415	0.447628	-1.33239	0.182732	0.616053
CNAG_12229	396.537	-0.593138	0.18513	-3.2039	0.00135579	0.0762001
CNAG_05760	60.977	-0.589846	0.35721	-1.65126	0.0986857	0.513523
CNAG_10135	1.58402	-0.586629	0.435155	-1.34809	0.177629	NA
CNAG_12566	39.7408	-0.584209	0.392614	-1.488	0.136751	0.564843
CNAG_07940	324.075	-0.582886	0.303825	-1.91849	0.0550488	0.425116
CNAG_12790	37.0676	-0.581835	0.461964	-1.25948	0.207856	0.637086
CNAG_03234	754.506	-0.580845	0.200339	-2.89932	0.00373976	0.128181
CNAG_05654	3089.39	-0.580687	0.249983	-2.3229	0.0201844	0.267993
CNAG_12291	286.725	-0.578862	0.190905	-3.0322	0.00242781	0.100843
CNAG_06559	1327.21	-0.578232	0.231618	-2.49649	0.0125428	0.226608
CNAG_01986	1824.85	-0.577592	0.316896	-1.82265	0.0683559	0.454776
CNAG_01955	17.2829	-0.577576	0.429405	-1.34506	0.178606	0.610222
CNAG_12847	8.78965	-0.577056	0.476333	-1.21145	0.225722	NA
CNAG_03894	11776.3	-0.576559	0.247063	-2.33365	0.0196142	0.267284
CNAG_03460	40.4621	-0.576551	0.310392	-1.85749	0.0632409	0.442217
CNAG_12191	28.9783	-0.573903	0.381429	-1.50461	0.132424	0.560552
CNAG_02874	2405.96	-0.573193	0.164168	-3.4915	0.000480309	0.0411878
CNAG_10098	1.5994	-0.572623	0.446353	-1.28289	0.199529	NA
CNAG_04509	59.6396	-0.569606	0.354525	-1.60667	0.108126	0.531578
CNAG_04361	5059.74	-0.569359	0.421229	-1.35166	0.176483	0.60828
CNAG_01989	493.001	-0.567862	0.211436	-2.68574	0.00723693	0.171769
CNAG_01794	1119.65	-0.567377	0.123765	-4.58429	4.55534e-06	0.00213699
CNAG_12173	490.205	-0.567042	0.157496	-3.60035	0.000317788	0.0344539
CNAG_01572	4054.66	-0.566263	0.139173	-4.06876	4.72648e-05	0.00998833
CNAG_01994	429.552	-0.565284	0.147763	-3.82561	0.000130449	0.0208066
CNAG_07307	48.2948	-0.563599	0.45151	-1.24825	0.211938	0.641543
CNAG_12411	24.8369	-0.562565	0.360988	-1.55841	0.119137	0.541517
CNAG_12810	2.53203	-0.562052	0.476715	-1.17901	0.238394	NA
CNAG_00454	516.494	-0.560893	0.44153	-1.27034	0.203963	0.63365
CNAG_00566	1545.27	-0.556816	0.234884	-2.3706	0.0177594	0.25798
CNAG_12572	70.6057	-0.55636	0.2869	-1.93921	0.0524757	0.417706
CNAG_05622	1936.75	-0.555875	0.201295	-2.76149	0.00575378	0.15593
CNAG_12369	64.3766	-0.554977	0.473461	-1.17217	0.241129	0.664938
CNAG_05093	166.711	-0.546168	0.300102	-1.81994	0.0687675	0.455878
CNAG_07611	86.0058	-0.544834	0.24684	-2.20724	0.0272975	0.312147
CNAG_00134	1418.71	-0.543492	0.219535	-2.47565	0.0132994	0.231804
CNAG_12686	35.0825	-0.542818	0.353329	-1.53629	0.124466	0.548506
CNAG_07551	1626.07	-0.540157	0.455385	-1.18615	0.235562	0.65805
CNAG_00242	231.685	-0.539516	0.177434	-3.04066	0.00236057	0.0998638
CNAG_12058	406.725	-0.537182	0.190423	-2.821	0.00478748	0.145296
CNAG_00522	11244.7	-0.532915	0.29038	-1.83523	0.0664713	0.453472
CNAG_01691	2025.36	-0.531882	0.338679	-1.57046	0.116307	0.539796
CNAG_10051	0.937215	-0.531582	0.348993	-1.52319	0.127711	NA
CNAG_12773	282.204	-0.53004	0.314196	-1.68697	0.0916083	0.49971
CNAG_05155	10144.6	-0.529027	0.296423	-1.78471	0.0743092	0.469213
CNAG_06366	7.67817	-0.528737	0.485573	-1.08889	0.276201	NA
CNAG_06298	1536.17	-0.528142	0.464672	-1.13659	0.255709	0.675034
CNAG_00366	219.202	-0.525554	0.210657	-2.49483	0.0126017	0.22686
CNAG_12480	10.1168	-0.525002	0.476363	-1.1021	0.270416	0.689613
CNAG_12945	109.308	-0.523384	0.306916	-1.7053	0.0881389	0.491888
CNAG_06884	1063.58	-0.523054	0.296127	-1.76632	0.077343	0.473367
CNAG_01239	3590.16	-0.522139	0.197707	-2.64097	0.00826684	0.183133
CNAG_04737	85928.4	-0.521814	0.430278	-1.21274	0.22523	0.652497
CNAG_12395	60.9911	-0.521568	0.27742	-1.88007	0.0600988	0.439695
CNAG_12812	3447.57	-0.521033	0.210125	-2.47963	0.0131517	0.231804
CNAG_12966	4.79404	-0.520347	0.483488	-1.07624	0.281822	NA
CNAG_01029	2505.17	-0.519607	0.177648	-2.92492	0.00344547	0.125091
CNAG_01969	849.056	-0.519307	0.118955	-4.36558	1.26787e-05	0.00424348
CNAG_06267	9618.71	-0.518748	0.434884	-1.19284	0.232931	0.657682
CNAG_07489	5794.07	-0.518652	0.153907	-3.3699	0.000751951	0.0512548
CNAG_01001	913.862	-0.518231	0.168342	-3.07844	0.00208088	0.0932305
CNAG_13051	69.4299	-0.515738	0.276593	-1.86461	0.0622361	0.442217
CNAG_12338	11.0133	-0.515442	0.48517	-1.0624	0.288056	0.708153
CNAG_12203	369.55	-0.514077	0.256007	-2.00806	0.0446365	0.388197
CNAG_07984	46.099	-0.513907	0.404543	-1.27034	0.203963	0.63365
CNAG_00080	388.348	-0.513505	0.179715	-2.85734	0.00427211	0.137245
CNAG_12170	26.629	-0.513129	0.432599	-1.18615	0.235561	0.65805
CNAG_07557	955.425	-0.512379	0.353022	-1.45141	0.146666	0.570955
CNAG_12868	93.3011	-0.511153	0.264758	-1.93064	0.053527	0.420524
CNAG_02415	2239.75	-0.510383	0.135727	-3.76036	0.000169672	0.024818
CNAG_01032	1120.63	-0.509495	0.190026	-2.68119	0.00733618	0.172076
CNAG_02899	344.144	-0.509297	0.350903	-1.45139	0.146672	0.570955
CNAG_06381	17392.6	-0.507205	0.124894	-4.06108	4.88457e-05	0.00998833
CNAG_06334	2154.31	-0.507175	0.427039	-1.18765	0.23497	0.65805
CNAG_02953	2740.86	-0.506302	0.346762	-1.46009	0.144266	0.568441
CNAG_03771	15456.8	-0.505698	0.454072	-1.1137	0.265409	0.68544
CNAG_00850	247.566	-0.503993	0.288129	-1.74919	0.0802577	0.477823
CNAG_07481	886.513	-0.501503	0.419451	-1.19562	0.231845	0.657293
CNAG_12098	105.139	-0.501044	0.297863	-1.68213	0.092544	0.501726
CNAG_12146	51.4838	-0.500992	0.384663	-1.30242	0.192773	0.624714
CNAG_06031	2493.08	-0.499474	0.143632	-3.47746	0.000506196	0.0420512
CNAG_12300	80.1646	-0.497703	0.249002	-1.99879	0.0456306	0.391716
CNAG_07309	1820.14	-0.496473	0.328224	-1.5126	0.13038	0.558724
CNAG_12759	5.56512	-0.496187	0.4449	-1.11528	0.264732	NA
CNAG_04766	63.7075	-0.494824	0.399233	-1.23944	0.215184	0.64539
CNAG_03455	3726.46	-0.492758	0.117936	-4.17818	2.93854e-05	0.00692976
CNAG_13163	151.52	-0.492418	0.231031	-2.13139	0.0330567	0.345514
CNAG_06256	4.38431	-0.491332	0.485676	-1.01164	0.311708	NA
CNAG_02667	1708.82	-0.491103	0.199995	-2.45558	0.0140656	0.234581
CNAG_03875	1853.36	-0.489894	0.11537	-4.24629	2.17339e-05	0.00559121
CNAG_12049	22.8076	-0.489668	0.413777	-1.18341	0.236647	0.659189
CNAG_05602	11613.6	-0.4888	0.175992	-2.7774	0.00547955	0.153331
CNAG_12145	33.0539	-0.488295	0.3671	-1.33014	0.183472	0.616338
CNAG_06337	2863.94	-0.487452	0.198945	-2.45018	0.0142785	0.234581
CNAG_04006	371.048	-0.487396	0.191558	-2.54438	0.0109473	0.211643
CNAG_01142	2877.02	-0.486497	0.198201	-2.45456	0.0141057	0.234581
CNAG_09005	31.2275	-0.485913	0.460289	-1.05567	0.291119	0.712606
CNAG_01514	5.72303	-0.485431	0.439147	-1.1054	0.268988	NA
CNAG_05131	663.639	-0.484952	0.168434	-2.87918	0.00398707	0.131937
CNAG_12419	377.228	-0.484709	0.195956	-2.47356	0.0133775	0.232431
CNAG_05699	1922.57	-0.483905	0.204524	-2.36601	0.0179811	0.259311
CNAG_01901	34.4782	-0.483604	0.391764	-1.23443	0.217044	0.645626
CNAG_12177	17.7044	-0.482934	0.441159	-1.09469	0.273651	0.692919
CNAG_00269	156.75	-0.482081	0.254147	-1.89686	0.0578466	0.43333
CNAG_05872	9852.22	-0.481395	0.325174	-1.48042	0.138761	0.565185
CNAG_13081	104.157	-0.481121	0.321378	-1.49705	0.134379	0.56238
CNAG_07910	48.9669	-0.480054	0.393179	-1.22095	0.222103	0.649897
CNAG_05089	129.96	-0.479407	0.323782	-1.48065	0.1387	0.565185
CNAG_12110	653.424	-0.478661	0.148185	-3.23016	0.00123721	0.0725495
CNAG_06438	119.761	-0.477391	0.275025	-1.73581	0.0825975	0.482929
CNAG_06106	4423.46	-0.477322	0.247851	-1.92584	0.0541243	0.422349
CNAG_01745	33015	-0.477157	0.191166	-2.49603	0.0125593	0.226608
CNAG_03727	7352.39	-0.475431	0.288192	-1.6497	0.099004	0.513523
CNAG_02544	43.3882	-0.475321	0.374447	-1.2694	0.2043	0.633744
CNAG_00732	5390.37	-0.473206	0.399026	-1.1859	0.23566	0.65805
CNAG_12590	87.9899	-0.472853	0.422714	-1.11861	0.263306	0.682793
CNAG_12246	77.7987	-0.471003	0.293413	-1.60526	0.108437	0.531578
CNAG_13073	222.976	-0.470698	0.340669	-1.38169	0.167068	0.594127
CNAG_01299	439.729	-0.469276	0.16621	-2.8234	0.00475177	0.145193
CNAG_06052	4476.74	-0.467509	0.134387	-3.47882	0.000503624	0.0420512
CNAG_12159	81.5325	-0.466385	0.432261	-1.07894	0.280614	0.699999
CNAG_01613	6727.69	-0.466034	0.143848	-3.23976	0.00119629	0.0718849
CNAG_03564	1232.69	-0.465878	0.41467	-1.12349	0.261229	0.680818
CNAG_12562	353.918	-0.465066	0.319476	-1.45572	0.145471	0.569529
CNAG_01125	8431.99	-0.462709	0.149959	-3.08556	0.00203169	0.0929612
CNAG_09000	54.621	-0.462529	0.38864	-1.19012	0.233998	0.657784
CNAG_10503	9.2488	-0.462473	0.419418	-1.10265	0.270177	0.689613
CNAG_04663	3491.03	-0.462111	0.147734	-3.12799	0.00176006	0.0868309
CNAG_02660	152.581	-0.461867	0.352408	-1.3106	0.189992	0.622253
CNAG_03642	1058.82	-0.46174	0.138245	-3.34	0.000837776	0.0550614
CNAG_03938	945.664	-0.460967	0.153025	-3.01237	0.00259214	0.102848
CNAG_03689	3701.73	-0.460922	0.252507	-1.82538	0.067943	0.454776
CNAG_02063	9937.29	-0.460346	0.180053	-2.55672	0.0105663	0.208579
CNAG_05021	29.8688	-0.460036	0.423642	-1.08591	0.277519	0.697736
CNAG_00840	113.987	-0.457106	0.254058	-1.79922	0.0719832	0.464712
CNAG_02263	2075.36	-0.457009	0.398053	-1.14811	0.250922	0.670806
CNAG_05616	6239.81	-0.456056	0.164758	-2.76804	0.00563946	0.155025
CNAG_01511	371.014	-0.454427	0.17913	-2.53687	0.011185	0.21384
CNAG_04638	1718.8	-0.45414	0.131974	-3.44112	0.000579307	0.0451406
CNAG_12184	12.6537	-0.453796	0.466605	-0.972549	0.330777	0.740349
CNAG_01232	22682.8	-0.453218	0.101261	-4.47575	7.61428e-06	0.00277655
CNAG_01007	1445.8	-0.45252	0.2689	-1.68285	0.0924035	0.501305
CNAG_07827	28.8986	-0.45219	0.476019	-0.949941	0.342142	0.747251
CNAG_01988	6061.71	-0.452091	0.146408	-3.08788	0.00201587	0.0929282
CNAG_06162	1434.49	-0.451019	0.163445	-2.75945	0.00578988	0.155994
CNAG_13075	1220.81	-0.449973	0.43007	-1.04628	0.295433	0.71635
CNAG_12010	19.9999	-0.448414	0.48477	-0.925004	0.354964	0.757111
CNAG_12892	74.3161	-0.447777	0.38333	-1.16812	0.242757	0.665367
CNAG_02398	2453.83	-0.44763	0.455045	-0.983705	0.325261	0.737594
CNAG_12470	120.064	-0.446647	0.284638	-1.56917	0.116608	0.539881
CNAG_02417	852.932	-0.446408	0.440542	-1.01332	0.31091	0.728627
CNAG_09004	39.6239	-0.445952	0.477773	-0.933396	0.350616	0.7561
CNAG_12554	548.803	-0.445839	0.151497	-2.94289	0.00325166	0.120614
CNAG_03842	305.915	-0.445511	0.147364	-3.02319	0.00250124	0.101544
CNAG_06904	1122.86	-0.445508	0.165388	-2.69372	0.00706597	0.170153
CNAG_12522	567.075	-0.445189	0.203779	-2.18466	0.0289135	0.321597
CNAG_12762	999.626	-0.444757	0.243001	-1.83027	0.0672101	0.454147
CNAG_06161	3502.56	-0.444231	0.146426	-3.03383	0.0024147	0.100823
CNAG_02438	272.801	-0.443625	0.395758	-1.12095	0.26231	0.682019
CNAG_02994	14098	-0.442476	0.12514	-3.53585	0.000406472	0.0395319
CNAG_12919	284.717	-0.442094	0.219789	-2.01145	0.0442784	0.387099
CNAG_07482	3966.68	-0.440381	0.316075	-1.39328	0.163535	0.590325
CNAG_03595	7394.01	-0.439662	0.132874	-3.30886	0.000936779	0.0592922
CNAG_07522	1777.05	-0.439464	0.345708	-1.2712	0.203657	0.63365
CNAG_07592	87.7335	-0.438782	0.380018	-1.15464	0.24824	0.668723
CNAG_00363	13596.8	-0.438525	0.233896	-1.87488	0.0608098	0.439695
CNAG_12241	1.46608	-0.438473	0.415011	-1.05653	0.290725	NA
CNAG_02521	81.2184	-0.437383	0.276213	-1.5835	0.113308	0.536458
CNAG_06698	6520.53	-0.436944	0.118248	-3.69515	0.000219758	0.0282673
CNAG_12153	56.4125	-0.436746	0.358839	-1.21711	0.223563	0.650695
CNAG_12371	129.568	-0.436251	0.239872	-1.81868	0.0689605	0.455943
CNAG_07842	164.988	-0.435121	0.176381	-2.46695	0.013627	0.234215
CNAG_10500	497152	-0.435118	0.185471	-2.34602	0.0189749	0.265018
CNAG_12002	94.6781	-0.434222	0.237162	-1.83091	0.067114	0.454147
CNAG_12799	9.65218	-0.433646	0.470436	-0.921797	0.356635	0.757635
CNAG_04988	40.338	-0.433502	0.310519	-1.39606	0.162698	0.589511
CNAG_02470	1734.45	-0.431395	0.301723	-1.42977	0.152782	0.578589
CNAG_12438	454.797	-0.431386	0.204802	-2.10636	0.0351731	0.35507
CNAG_00412	182.256	-0.431155	0.225009	-1.91617	0.0553439	0.426327
CNAG_12245	138.519	-0.43109	0.270007	-1.59659	0.110358	0.532702
CNAG_01742	10166.9	-0.430697	0.326904	-1.3175	0.18767	0.621214
CNAG_00156	5280.63	-0.430241	0.197742	-2.17576	0.0295729	0.324588
CNAG_07393	125.195	-0.428894	0.181227	-2.36661	0.0179518	0.259311
CNAG_04131	7016.02	-0.428783	0.126585	-3.38731	0.000705825	0.0498138
CNAG_02129	26503.2	-0.428713	0.466749	-0.918508	0.358353	0.758838
CNAG_12453	1275.28	-0.428134	0.177058	-2.41804	0.0156043	0.243433
CNAG_03738	2132.6	-0.426579	0.416301	-1.02469	0.30551	0.724916
CNAG_07784	3719.26	-0.426304	0.20985	-2.03147	0.0422075	0.379059
CNAG_12136	198.799	-0.425527	0.327484	-1.29938	0.193813	0.625082
CNAG_06726	1747.01	-0.425435	0.137139	-3.10222	0.00192078	0.0917707
CNAG_01883	841.253	-0.425402	0.141531	-3.00572	0.00264952	0.104088
CNAG_07477	2753.96	-0.425027	0.152156	-2.79337	0.00521627	0.15018
CNAG_04907	517.599	-0.424408	0.133195	-3.18636	0.00144077	0.0797926
CNAG_05313	5806.76	-0.423084	0.201092	-2.10394	0.0353839	0.355945
CNAG_07785	89.93	-0.422893	0.261962	-1.61433	0.106455	0.528032
CNAG_01137	12697.8	-0.421384	0.202469	-2.08123	0.0374128	0.364052
CNAG_03275	1114.14	-0.420647	0.136553	-3.08046	0.00206683	0.0931241
CNAG_03516	13266.9	-0.419584	0.174094	-2.4101	0.0159482	0.245069
CNAG_01970	4343.7	-0.418979	0.290367	-1.44293	0.14904	0.573922
CNAG_03833	402.993	-0.41861	0.291116	-1.43795	0.150449	0.575607
CNAG_06533	3866.54	-0.418562	0.263767	-1.58686	0.112544	0.535827
CNAG_12019	1523.29	-0.418042	0.177112	-2.36032	0.018259	0.26102
CNAG_03563	4433.11	-0.417696	0.429877	-0.971664	0.331218	0.740735
CNAG_12381	26.7832	-0.417427	0.353833	-1.17973	0.238108	0.660492
CNAG_02030	36361.3	-0.417222	0.165566	-2.51997	0.0117364	0.219052
CNAG_00814	5181.59	-0.416924	0.203286	-2.05092	0.0402745	0.375059
CNAG_12968	895.794	-0.416622	0.253877	-1.64104	0.100789	0.516245
CNAG_12484	102.239	-0.41629	0.241825	-1.72145	0.0851691	0.485599
CNAG_04133	1344.71	-0.415571	0.171229	-2.427	0.0152244	0.241381
CNAG_02943	18430.3	-0.414138	0.411093	-1.00741	0.313739	0.731245
CNAG_12750	195.714	-0.414089	0.178468	-2.32024	0.0203278	0.268532
CNAG_03525	3313.37	-0.413237	0.2401	-1.72111	0.0852314	0.485599
CNAG_04307	7403.38	-0.413179	0.216055	-1.91238	0.0558276	0.427704
CNAG_12067	418.437	-0.412669	0.219485	-1.88017	0.0600846	0.439695
CNAG_06560	1229.68	-0.411612	0.190231	-2.16375	0.0304834	0.33015
CNAG_04889	1441.03	-0.410838	0.311995	-1.31681	0.187901	0.621274
CNAG_02869	1544.83	-0.410162	0.24046	-1.70574	0.0880559	0.491888
CNAG_02321	67.289	-0.409577	0.270788	-1.51254	0.130398	0.558724
CNAG_00807	3153.57	-0.409408	0.291006	-1.40687	0.159465	0.584867
CNAG_12374	60.0741	-0.40932	0.288153	-1.4205	0.155463	0.581352
CNAG_12735	42.2926	-0.40925	0.293853	-1.3927	0.16371	0.590496
CNAG_13189	281.284	-0.408639	0.270273	-1.51195	0.130546	0.558724
CNAG_04938	3355.71	-0.4083	0.411901	-0.991259	0.321559	0.734471
CNAG_05864	13024.7	-0.408217	0.314268	-1.29895	0.193963	0.625082
CNAG_03565	7976.34	-0.407548	0.434372	-0.938247	0.348118	0.753185
CNAG_04330	143.882	-0.406997	0.238339	-1.70764	0.0877027	0.491172
CNAG_07796	1869.74	-0.406908	0.246606	-1.65003	0.098937	0.513523
CNAG_01367	6050.1	-0.406242	0.189909	-2.13914	0.0324242	0.343404
CNAG_12950	151.59	-0.405948	0.404505	-1.00357	0.315588	0.732161
CNAG_03697	1530.18	-0.405639	0.197658	-2.05223	0.0401471	0.37491
CNAG_04086	106.854	-0.404337	0.228024	-1.77322	0.0761923	0.471765
CNAG_02683	3425.68	-0.403504	0.114861	-3.51297	0.000443125	0.039707
CNAG_01419	3876.68	-0.403465	0.259284	-1.55608	0.11969	0.542579
CNAG_02493	3704.33	-0.40329	0.0713968	-5.64857	1.61787e-08	3.46755e-05
CNAG_00066	17429.8	-0.401871	0.214973	-1.8694	0.0615673	0.441733
CNAG_13122	171.093	-0.401589	0.232675	-1.72596	0.0843539	0.485395
CNAG_10024	4.79119	-0.400663	0.476115	-0.841527	0.400053	NA
CNAG_02849	169.164	-0.40035	0.282963	-1.41485	0.157113	0.584083
CNAG_01875	2930.69	-0.400233	0.13885	-2.88249	0.00394547	0.131937
CNAG_04677	2108.42	-0.400068	0.112273	-3.56335	0.000366157	0.0364984
CNAG_04849	1069.04	-0.399551	0.267726	-1.49239	0.135598	0.562923
CNAG_07841	2.68337	-0.39728	0.464548	-0.855197	0.392442	NA
CNAG_04705	3344.75	-0.39647	0.170675	-2.32296	0.0201815	0.267993
CNAG_00074	6216.63	-0.39537	0.196668	-2.01034	0.0443954	0.387099
CNAG_04953	14683.9	-0.395091	0.309077	-1.27829	0.201146	0.632181
CNAG_05531	2066.5	-0.394751	0.281508	-1.40227	0.160833	0.587023
CNAG_04241	2116.16	-0.394483	0.149271	-2.64273	0.00822395	0.183133
CNAG_06918	879.726	-0.394429	0.146007	-2.70143	0.00690413	0.168241
CNAG_07600	2224.39	-0.39367	0.232551	-1.69283	0.0904873	0.497231
CNAG_06802	12.4174	-0.392926	0.485663	-0.80905	0.418486	0.799085
CNAG_10502	434820	-0.392412	0.183653	-2.1367	0.0326223	0.343676
CNAG_04016	194.125	-0.391806	0.223539	-1.75274	0.0796465	0.47668
CNAG_12385	37.9551	-0.391459	0.391148	-1.0008	0.316926	0.733242
CNAG_04688	1228.59	-0.391431	0.216973	-1.80405	0.0712228	0.462236
CNAG_07799	7726.59	-0.391157	0.205297	-1.90533	0.0567378	0.429547
CNAG_05873	1627.58	-0.391052	0.276689	-1.41333	0.157559	0.584083
CNAG_06050	2165.59	-0.390642	0.155087	-2.51885	0.0117738	0.219052
CNAG_05070	18070.5	-0.390518	0.162851	-2.398	0.0164847	0.249461
CNAG_02283	1224.58	-0.390251	0.203138	-1.92111	0.0547177	0.424901
CNAG_12636	78.9895	-0.390208	0.29535	-1.32117	0.186445	0.620672
CNAG_06541	27216.6	-0.389191	0.244039	-1.59479	0.11076	0.532755
CNAG_12176	140.934	-0.388465	0.298459	-1.30157	0.193063	0.62476
CNAG_07859	1256.49	-0.388131	0.113696	-3.41376	0.000640719	0.0464521
CNAG_04592	6.81088	-0.387319	0.447814	-0.864911	0.387087	NA
CNAG_12277	120.831	-0.385455	0.431508	-0.893274	0.37171	0.770772
CNAG_04293	2031.53	-0.385362	0.260165	-1.48122	0.138549	0.565185
CNAG_02972	53.0425	-0.384931	0.311219	-1.23685	0.216143	0.645626
CNAG_00053	382.498	-0.384339	0.233335	-1.64715	0.0995264	0.51447
CNAG_04036	1960.18	-0.384235	0.145195	-2.64634	0.0081369	0.182695
CNAG_03570	346.003	-0.384162	0.323745	-1.18662	0.235378	0.65805
CNAG_02102	363.726	-0.3839	0.243101	-1.57918	0.114294	0.536561
CNAG_00851	412.55	-0.3828	0.403257	-0.94927	0.342483	0.747483
CNAG_05178	161.299	-0.382722	0.363335	-1.05336	0.292178	0.713609
CNAG_03095	26.206	-0.382719	0.461759	-0.82883	0.407201	0.794137
CNAG_06827	567.507	-0.38105	0.381084	-0.999912	0.317353	0.733846
CNAG_04869	10679.3	-0.380714	0.216925	-1.75505	0.0792499	0.47668
CNAG_00575	5031.31	-0.380627	0.464579	-0.819293	0.412619	0.797091
CNAG_07647	2743.34	-0.380452	0.284368	-1.33788	0.180934	0.613686
CNAG_05074	7409.6	-0.379705	0.160812	-2.36117	0.0182176	0.26102
CNAG_01358	156.188	-0.379535	0.268972	-1.41106	0.158228	0.584199
CNAG_04886	1228.72	-0.379268	0.333129	-1.1385	0.254911	0.674266
CNAG_05542	52.9118	-0.378824	0.310177	-1.22132	0.221966	0.649897
CNAG_03195	1000.77	-0.378679	0.151088	-2.50635	0.0121983	0.223595
CNAG_12409	98.9195	-0.378519	0.229487	-1.64941	0.0990629	0.513523
CNAG_02673	16563.7	-0.378402	0.281571	-1.3439	0.178982	0.610514
CNAG_03791	4053.56	-0.378264	0.258681	-1.46228	0.143664	0.568064
CNAG_12526	1083.71	-0.376971	0.275626	-1.36769	0.171409	0.599556
CNAG_12394	19.3742	-0.376694	0.442884	-0.850546	0.395021	0.784372
CNAG_00546	8529.78	-0.376126	0.122869	-3.06119	0.00220461	0.0966029
CNAG_01579	4392.01	-0.37603	0.190575	-1.97314	0.0484799	0.402662
CNAG_12926	80.2364	-0.37546	0.363107	-1.03402	0.301127	0.722091
CNAG_01242	7202.75	-0.375214	0.151529	-2.47618	0.0132796	0.231804
CNAG_04137	1125.52	-0.374915	0.27823	-1.3475	0.177819	0.608391
CNAG_12814	224.338	-0.374625	0.173616	-2.15778	0.0309446	0.333041
CNAG_12816	948.344	-0.37383	0.106778	-3.501	0.000463509	0.0406207
CNAG_00087	2731.14	-0.373662	0.185727	-2.01189	0.0442317	0.387099
CNAG_06924	2467.82	-0.373386	0.296908	-1.25758	0.208542	0.637457
CNAG_03345	20259.2	-0.373214	0.162376	-2.29845	0.021536	0.276569
CNAG_02966	935.152	-0.373007	0.44102	-0.845781	0.397675	0.786182
CNAG_12732	969.659	-0.372698	0.0943736	-3.94918	7.84189e-05	0.0141113
CNAG_00184	5555.11	-0.372523	0.0944164	-3.94553	7.96251e-05	0.0141113
CNAG_12378	1.90592	-0.372328	0.447692	-0.831661	0.4056	NA
CNAG_04197	4074.85	-0.371907	0.261892	-1.42008	0.155585	0.581352
CNAG_12113	416.662	-0.371525	0.159278	-2.33256	0.0196712	0.267284
CNAG_12034	181.682	-0.371201	0.24026	-1.545	0.122347	0.546926
CNAG_13064	71.409	-0.371179	0.392759	-0.945055	0.344631	0.750474
CNAG_02877	9567.16	-0.371015	0.474756	-0.781486	0.434517	0.806523
CNAG_01389	1905.31	-0.370765	0.240468	-1.54185	0.123111	0.548155
CNAG_07903	3196.93	-0.37029	0.192848	-1.92012	0.0548433	0.425049
CNAG_13048	44.844	-0.369844	0.392511	-0.942251	0.346064	0.750983
CNAG_06595	658.282	-0.369577	0.178776	-2.06726	0.03871	0.36869
CNAG_01913	922.406	-0.369412	0.250968	-1.47195	0.141034	0.565993
CNAG_07425	270.797	-0.369251	0.214538	-1.72115	0.0852245	0.485599
CNAG_12454	111.706	-0.368939	0.333084	-1.10765	0.268014	0.688378
CNAG_02572	227.435	-0.368595	0.22701	-1.62369	0.104441	0.524299
CNAG_03704	14.565	-0.36851	0.481339	-0.765593	0.443918	0.811984
CNAG_04353	1878.33	-0.368109	0.271879	-1.35395	0.175754	0.608084
CNAG_02476	1341.31	-0.367658	0.112348	-3.27249	0.00106606	0.0664207
CNAG_03553	7161.8	-0.367552	0.219289	-1.67611	0.0937172	0.505338
CNAG_12727	296.991	-0.367113	0.23969	-1.53161	0.125618	0.551351
CNAG_00492	541.175	-0.36708	0.164726	-2.22843	0.025852	0.303638
CNAG_04623	333.427	-0.367055	0.236349	-1.55302	0.120419	0.54424
CNAG_06427	1456.24	-0.365828	0.314262	-1.16409	0.244389	0.666525
CNAG_12175	825.671	-0.365772	0.325221	-1.12469	0.260723	0.680387
CNAG_00664	478.651	-0.365671	0.241525	-1.51401	0.130025	0.558098
CNAG_12671	346.077	-0.365535	0.20271	-1.80325	0.0713495	0.462236
CNAG_02805	345.137	-0.365377	0.140128	-2.60746	0.00912167	0.192448
CNAG_02674	863.57	-0.365369	0.155349	-2.35192	0.0186769	0.263626
CNAG_06388	2321.38	-0.365257	0.459095	-0.795602	NA	NA
CNAG_01499	1209.7	-0.365241	0.134719	-2.71112	0.00670557	0.16702
CNAG_04695	443.749	-0.365081	0.178021	-2.05078	0.0402888	0.375059
CNAG_00531	47999.4	-0.364908	0.151713	-2.40525	0.0161614	0.246438
CNAG_07899	51.7199	-0.364871	0.435472	-0.837875	0.402101	0.790815
CNAG_07677	953.334	-0.364614	0.278837	-1.30762	0.191002	0.624278
CNAG_02658	11626	-0.364528	0.140272	-2.59872	0.00935722	0.196379
CNAG_06664	883.85	-0.364189	0.41414	-0.879386	0.379192	0.775598
CNAG_07648	3.26431	-0.364114	0.436187	-0.834766	NA	NA
CNAG_02282	2976.09	-0.364041	0.292639	-1.244	0.213501	0.643248
CNAG_06529	334.103	-0.363949	0.141351	-2.57479	0.01003	0.204576
CNAG_03173	5290.72	-0.363668	0.254848	-1.427	0.15358	0.579902
CNAG_01873	10.4598	-0.362947	0.451175	-0.804449	0.421138	0.79928
CNAG_12468	29.051	-0.362919	0.417943	-0.868347	0.385205	0.778712
CNAG_06593	1914.12	-0.362334	0.202995	-1.78494	0.0742711	0.469213
CNAG_06498	4919.37	-0.362157	0.222896	-1.62478	0.104209	0.524299
CNAG_04915	40.4021	-0.362054	0.36252	-0.998713	0.317934	0.733846
CNAG_04200	4099.28	-0.361799	0.388909	-0.930293	0.352219	0.756173
CNAG_04960	1452.95	-0.361608	0.219724	-1.64573	0.0998188	0.514868
CNAG_05212	125.684	-0.361591	0.243284	-1.48629	0.137202	0.564843
CNAG_01121	1366.91	-0.361555	0.241906	-1.49461	0.135015	0.56238
CNAG_00229	1150.74	-0.36149	0.241247	-1.49843	0.134023	0.56238
CNAG_10034	0.764	-0.361477	0.392822	-0.920204	0.357466	NA
CNAG_02430	3802.89	-0.360986	0.132843	-2.71739	0.00657983	0.165013
CNAG_07391	176.877	-0.360851	0.48442	-0.744913	0.456324	0.816694
CNAG_01062	7537.02	-0.360684	0.133989	-2.69189	0.00710483	0.170153
CNAG_00262	48.0192	-0.36042	0.298062	-1.20921	0.226582	0.653488
CNAG_13062	314.753	-0.359636	0.149788	-2.40097	0.0163519	0.247921
CNAG_02168	8092.19	-0.359324	0.16367	-2.19541	0.0281341	0.317354
CNAG_07972	3202.15	-0.358578	0.257156	-1.3944	0.163198	0.59025
CNAG_01082	5585.25	-0.358377	0.168272	-2.12975	0.0331923	0.346181
CNAG_03091	41.7586	-0.358272	0.349438	-1.02528	0.305231	0.724686
CNAG_12096	4.01322	-0.357814	0.442496	-0.808628	0.418729	NA
CNAG_12471	92.6594	-0.356792	0.310808	-1.14795	0.25099	0.670806
CNAG_00612	2280.14	-0.356573	0.130414	-2.73416	0.00625401	0.161934
CNAG_12276	7.07579	-0.355859	0.478861	-0.743137	0.457399	NA
CNAG_13143	13.2761	-0.355681	0.485117	-0.733186	0.463445	0.818827
CNAG_02998	2371.31	-0.355613	0.117678	-3.02192	0.00251176	0.101544
CNAG_12593	170.669	-0.355286	0.2398	-1.4816	0.138448	0.565185
CNAG_07692	4537.27	-0.354852	0.129212	-2.74626	0.00602782	0.159432
CNAG_04926	638.988	-0.354658	0.173235	-2.04726	0.0406323	0.376124
CNAG_01542	5154.04	-0.354601	0.276431	-1.28278	0.199568	0.629789
CNAG_12365	5230.41	-0.354069	0.278767	-1.27013	0.204039	0.63365
CNAG_03674	15155.5	-0.353898	0.149098	-2.3736	0.0176159	0.256913
CNAG_09008	24.2091	-0.353883	0.478293	-0.739887	0.459369	0.818103
CNAG_02013	680.185	-0.35245	0.251617	-1.40074	0.161293	0.587356
CNAG_07432	3238.26	-0.352243	0.147473	-2.38853	0.0169161	0.253137
CNAG_02167	1939.68	-0.351393	0.137126	-2.56255	0.0103908	0.207167
CNAG_02216	5787.83	-0.351009	0.196252	-1.78856	0.0736856	0.468241
CNAG_12675	555.318	-0.350854	0.27123	-1.29357	0.195814	0.626232
CNAG_12264	25.2633	-0.350128	0.355936	-0.983683	0.325272	0.737594
CNAG_07303	24.9218	-0.349395	0.350798	-0.995999	0.319251	0.734471
CNAG_03883	981.074	-0.349226	0.217433	-1.60613	0.108246	0.531578
CNAG_01558	58483.2	-0.349215	0.386307	-0.903984	0.366004	0.766362
CNAG_13162	615.216	-0.349195	0.185788	-1.87953	0.060172	0.439695
CNAG_00583	13776.7	-0.349015	0.100093	-3.48689	0.000488665	0.0414585
CNAG_00870	2749.78	-0.348723	0.27284	-1.27812	0.201207	0.632181
CNAG_04033	5389.53	-0.348008	0.166961	-2.08437	0.0371262	0.363737
CNAG_03355	15057	-0.347515	0.187491	-1.85351	0.0638099	0.442217
CNAG_12501	238.893	-0.347208	0.252781	-1.37356	0.16958	0.598142
CNAG_05309	7032.78	-0.346973	0.195991	-1.77035	0.0766687	0.472911
CNAG_04551	25.3601	-0.34658	0.391313	-0.885685	0.375788	0.773794
CNAG_02680	2859.11	-0.346212	0.143296	-2.41606	0.0156896	0.243433
CNAG_04999	463.176	-0.346207	0.196881	-1.75846	0.0786691	0.47668
CNAG_00901	290.09	-0.346079	0.388644	-0.890479	0.373209	0.772228
CNAG_12046	670.99	-0.344693	0.322406	-1.06913	0.285012	0.705453
CNAG_12268	19.5222	-0.344643	0.411002	-0.838543	0.401726	0.790432
CNAG_02598	1672.73	-0.344465	0.0925099	-3.72354	0.000196445	0.0265534
CNAG_00554	2284.61	-0.344417	0.270551	-1.27302	0.203011	0.63365
CNAG_03785	9641.99	-0.343925	0.244699	-1.4055	0.159873	0.585931
CNAG_03282	2354.04	-0.343664	0.240571	-1.42854	0.153137	0.579074
CNAG_02165	3429.5	-0.34362	0.199508	-1.72234	0.0850087	0.485599
CNAG_03021	587.013	-0.343156	0.164459	-2.08658	0.0369265	0.362636
CNAG_13002	78.1469	-0.342573	0.271686	-1.26091	0.20734	0.637086
CNAG_01610	3362.86	-0.341854	0.326249	-1.04783	0.294717	0.71635
CNAG_01753	8899.28	-0.341713	0.24147	-1.41514	0.157028	0.584083
CNAG_12828	72.1179	-0.341671	0.291602	-1.1717	0.241316	0.665224
CNAG_12957	314.105	-0.341652	0.188203	-1.81534	0.0694714	0.457502
CNAG_06487	2880.64	-0.341601	0.242552	-1.40836	0.159023	0.584867
CNAG_06193	4907.26	-0.341295	0.110524	-3.08798	0.00201521	0.0929282
CNAG_01555	146.966	-0.340472	0.202825	-1.67865	0.0932211	0.503685
CNAG_13072	65.1938	-0.340459	0.383304	-0.888222	0.374421	0.772525
CNAG_06081	59363.1	-0.340215	0.149321	-2.27841	0.0227021	0.283332
CNAG_06740	6179.52	-0.339935	0.136789	-2.4851	0.0129514	0.231586
CNAG_02413	3387.25	-0.339777	0.131901	-2.576	0.00999517	0.204388
CNAG_06309	1800.29	-0.339721	0.146218	-2.32339	0.0201581	0.267993
CNAG_00638	3268.42	-0.339579	0.43845	-0.774499	0.438636	0.809189
CNAG_07422	14.5707	-0.339378	0.47005	-0.722004	0.470292	0.822426
CNAG_00939	35.2608	-0.339097	0.441793	-0.767547	0.442756	0.810711
CNAG_12932	1199.82	-0.339094	0.145237	-2.33477	0.0195557	0.267284
CNAG_01108	1920.32	-0.338181	0.12768	-2.64865	0.00808139	0.182059
CNAG_01193	1305.28	-0.338063	0.13974	-2.41924	0.0155531	0.243433
CNAG_01651	686.2	-0.338046	0.137586	-2.45699	0.0140108	0.234581
CNAG_01905	9261.31	-0.337789	0.10865	-3.10897	0.0018774	0.0910761
CNAG_04256	1380.81	-0.337751	0.291723	-1.15778	0.246954	0.667387
CNAG_12793	84.7148	-0.337631	0.397647	-0.849072	0.395841	0.784697
CNAG_01744	36000.8	-0.337266	0.141962	-2.37575	0.0175132	0.256913
CNAG_04265	3003.28	-0.336939	0.279392	-1.20597	0.227828	0.653619
CNAG_07443	611.368	-0.33627	0.147945	-2.27294	0.0230299	0.285869
CNAG_12343	86.4771	-0.335944	0.385199	-0.872132	0.383136	0.777421
CNAG_04921	360.706	-0.335438	0.29279	-1.14566	0.251937	0.671522
CNAG_01971	34.2425	-0.335238	0.365903	-0.916194	0.359565	0.75963
CNAG_07936	6750.62	-0.335146	0.146309	-2.29067	0.0219824	0.280047
CNAG_04108	1289.96	-0.33454	0.332102	-1.00734	0.313771	0.731245
CNAG_03447	2409.46	-0.334374	0.213862	-1.5635	0.117934	0.541031
CNAG_12605	967.932	-0.334355	0.120099	-2.784	0.00536936	0.152387
CNAG_03741	4.86739	-0.334147	0.481391	-0.694129	0.487602	NA
CNAG_03024	5930.59	-0.333349	0.167965	-1.98464	0.0471849	0.399893
CNAG_03548	202.446	-0.333328	0.17206	-1.93728	0.0527106	0.418115
CNAG_03037	680.577	-0.333092	0.237484	-1.40259	0.16074	0.587023
CNAG_04616	2104.88	-0.332665	0.125553	-2.64959	0.00805898	0.182059
CNAG_06312	6683	-0.332604	0.485289	-0.685374	0.493108	0.83249
CNAG_01048	3432.97	-0.332573	0.128123	-2.59573	0.00943902	0.197058
CNAG_12243	494.975	-0.332129	0.247057	-1.34434	0.178839	0.610288
CNAG_05463	3030.39	-0.332082	0.227062	-1.46252	0.1436	0.568064
CNAG_02298	4973.26	-0.331999	0.23769	-1.39677	0.162482	0.589047
CNAG_12596	8.99423	-0.331995	0.485637	-0.683628	0.49421	NA
CNAG_04590	810.339	-0.331844	0.135983	-2.44034	0.0146735	0.237366
CNAG_03002	1322.46	-0.331572	0.483352	-0.685984	0.492723	0.83249
CNAG_01004	6117.37	-0.331547	0.133756	-2.47875	0.0131845	0.231804
CNAG_03546	664.64	-0.330569	0.201823	-1.63792	0.101439	0.517912
CNAG_07433	4891.01	-0.330372	0.170759	-1.93472	0.0530244	0.418269
CNAG_02912	8151.24	-0.330232	0.147415	-2.24016	0.0250806	0.297901
CNAG_07436	66.7199	-0.330171	0.358124	-0.921946	0.356557	0.757635
CNAG_01418	1376.58	-0.330054	0.291759	-1.13126	0.257947	0.676053
CNAG_03899	9514.26	-0.330029	0.107318	-3.07524	0.00210332	0.0937093
CNAG_01234	4130.8	-0.33	0.209787	-1.57302	0.115713	0.539383
CNAG_01722	17220.1	-0.329984	0.161597	-2.04202	0.0411498	0.376628
CNAG_03628	3454.54	-0.329273	0.145953	-2.25602	0.0240692	0.293954
CNAG_07496	9.23959	-0.329242	0.449685	-0.732162	0.46407	0.818827
CNAG_03152	5279.1	-0.329149	0.0790309	-4.16481	3.11618e-05	0.00710043
CNAG_00642	5746.99	-0.329069	0.142321	-2.31216	0.0207687	0.270197
CNAG_02069	596.999	-0.329036	0.435109	-0.756215	0.44952	0.815168
CNAG_04126	15.7883	-0.328829	0.48329	-0.680397	0.496253	0.833885
CNAG_06738	3196.54	-0.328731	0.160077	-2.05359	0.0400155	0.37491
CNAG_03518	669.308	-0.328509	0.134808	-2.43687	0.014815	0.238009
CNAG_13135	26.9283	-0.328295	0.480573	-0.683133	0.494523	0.832616
CNAG_04163	7987.92	-0.328177	0.452967	-0.724507	0.468755	0.821789
CNAG_07757	4404.22	-0.328136	0.165834	-1.97871	0.047849	0.402336
CNAG_04803	13177.8	-0.327425	0.116999	-2.79853	0.00513354	0.149416
CNAG_03194	1562.57	-0.327355	0.197165	-1.66031	0.0968523	0.509497
CNAG_07575	1428.94	-0.327307	0.296591	-1.10356	0.269783	0.689613
CNAG_04579	1509.58	-0.327271	0.122611	-2.66918	0.00760366	0.175766
CNAG_01765	5747.31	-0.327112	0.103734	-3.15339	0.00161388	0.0835156
CNAG_06136	1085.11	-0.327017	0.145877	-2.24173	0.0249789	0.297901
CNAG_00093	6435.67	-0.3267	0.407428	-0.80186	0.422634	0.800377
CNAG_01031	8040.93	-0.326312	0.438652	-0.743898	0.456938	0.817081
CNAG_06497	1000.73	-0.326095	0.434422	-0.750641	0.452869	0.815168
CNAG_10501	3509.97	-0.326072	0.130213	-2.50415	0.0122745	0.223595
CNAG_03740	356.528	-0.32585	0.166826	-1.95323	0.0507928	0.412078
CNAG_10138	3.06544	-0.325643	0.485806	-0.670316	0.502656	NA
CNAG_01115	6988.46	-0.325316	0.146748	-2.21683	0.0266346	0.309866
CNAG_07811	64.5875	-0.325303	0.266643	-1.21999	0.222468	0.65036
CNAG_04788	4791.74	-0.325302	0.237022	-1.37246	0.169922	0.598708
CNAG_12839	38.4508	-0.32508	0.465994	-0.697606	0.485424	0.829525
CNAG_00704	4965.92	-0.324975	0.122881	-2.64462	0.00817833	0.182695
CNAG_06745	19740.8	-0.324948	0.117322	-2.76971	0.00561066	0.154827
CNAG_03372	2126.16	-0.323674	0.294916	-1.09751	0.272417	0.691666
CNAG_04274	175.422	-0.323536	0.259255	-1.24795	0.212051	0.641543
CNAG_01411	1687.44	-0.323161	0.246166	-1.31278	0.189258	0.621859
CNAG_12997	20.2529	-0.322828	0.390313	-0.8271	0.40818	0.795124
CNAG_06658	4846.44	-0.32275	0.278367	-1.15944	0.246277	0.666829
CNAG_05015	527.318	-0.322545	0.188071	-1.71502	0.0863412	0.488002
CNAG_07370	376.354	-0.322528	0.158966	-2.02891	0.042467	0.37968
CNAG_12592	4.60559	-0.321958	0.479435	-0.671535	0.501879	NA
CNAG_06553	3122.47	-0.321601	0.152605	-2.10741	0.0350824	0.354603
CNAG_05649	759.778	-0.321309	0.183448	-1.7515	0.0798605	0.476712
CNAG_07521	790.864	-0.320554	0.177491	-1.80602	0.0709147	0.461669
CNAG_02230	25687.2	-0.319475	0.393868	-0.811122	0.417296	0.798484
CNAG_03402	1774.35	-0.319302	0.150272	-2.12482	0.0336017	0.347453
CNAG_05138	17834.3	-0.319189	0.197286	-1.6179	0.105685	0.526443
CNAG_01261	14068.4	-0.319021	0.242172	-1.31733	0.187727	0.621214
CNAG_00726	32.5111	-0.319003	0.428731	-0.744063	0.456839	0.817081
CNAG_00727	1884.65	-0.318862	0.348452	-0.915081	0.360149	0.760197
CNAG_02585	20166.9	-0.318839	0.136105	-2.3426	0.01915	0.266996
CNAG_06475	19029.9	-0.318276	0.122823	-2.59133	0.00956047	0.197737
CNAG_07822	910.884	-0.31823	0.270732	-1.17544	0.239817	0.664538
CNAG_12665	50.8081	-0.318176	0.322257	-0.987336	0.323478	0.736934
CNAG_12024	744.105	-0.318125	0.255345	-1.24586	0.212814	0.642295
CNAG_04363	882.652	-0.317858	0.131053	-2.42541	0.0152913	0.241559
CNAG_13007	3345.14	-0.317537	0.123512	-2.5709	0.0101434	0.20614
CNAG_02311	55.7899	-0.317261	0.279946	-1.13329	0.257091	0.675574
CNAG_02125	918.293	-0.317171	0.133868	-2.36928	0.0178227	0.258429
CNAG_05390	1747.77	-0.317075	0.125936	-2.51774	0.0118109	0.219052
CNAG_04015	565.399	-0.316932	0.169505	-1.86975	0.0615183	0.441733
CNAG_01349	49.7012	-0.316855	0.310658	-1.01995	0.307754	0.726972
CNAG_03882	1647.76	-0.316751	0.248206	-1.27616	0.201897	0.633282
CNAG_00125	1130.72	-0.316732	0.167155	-1.89483	0.0581144	0.433547
CNAG_02139	6635.13	-0.316619	0.18239	-1.73594	0.0825744	0.482929
CNAG_05181	5175.57	-0.316379	0.172903	-1.82981	0.0672788	0.454147
CNAG_07817	5457.03	-0.31625	0.234256	-1.35002	0.17701	0.60828
CNAG_02087	1005.02	-0.316244	0.127705	-2.47636	0.0132729	0.231804
CNAG_05915	11132.4	-0.315919	0.478313	-0.660486	0.508942	0.843241
CNAG_06812	8835.32	-0.315477	0.170123	-1.8544	0.0636816	0.442217
CNAG_01954	313.707	-0.31534	0.191166	-1.64956	0.0990334	0.513523
CNAG_12840	864.698	-0.315216	0.227617	-1.38485	0.166098	0.59188
CNAG_03216	1517.47	-0.315002	0.160567	-1.96182	0.0497836	0.406221
CNAG_02744	4366.99	-0.314911	0.10935	-2.87984	0.00397875	0.131937
CNAG_07722	37.3144	-0.314377	0.313305	-1.00342	0.315658	0.732161
CNAG_12867	352.829	-0.313844	0.204038	-1.53817	0.124007	0.548506
CNAG_00130	24653.9	-0.313688	0.427737	-0.733366	0.463335	0.818827
CNAG_04524	6775.08	-0.313554	0.126511	-2.47846	0.0131949	0.231804
CNAG_00555	3500.13	-0.313133	0.181503	-1.72522	0.0844883	0.485395
CNAG_02362	1585.15	-0.313063	0.422008	-0.74184	0.458184	0.817569
CNAG_01457	3545.22	-0.312863	0.109995	-2.84433	0.00445043	0.138471
CNAG_00475	4472.97	-0.312714	0.140566	-2.22467	0.0261034	0.305242
CNAG_04735	215205	-0.312253	0.301316	-1.0363	0.300063	0.720566
CNAG_03657	3277.43	-0.312247	0.129023	-2.42008	0.015517	0.243433
CNAG_08008	2598.49	-0.312058	0.210973	-1.47914	0.139103	0.565185
CNAG_00027	1610.2	-0.311766	0.191677	-1.62652	0.10384	0.523391
CNAG_12628	526.973	-0.310863	0.230423	-1.3491	0.177305	0.60828
CNAG_00402	13590.7	-0.310647	0.110377	-2.81441	0.00488664	0.145414
CNAG_07317	1696.31	-0.310615	0.243847	-1.27381	0.202731	0.63365
CNAG_06954	4.46242	-0.310073	0.48543	-0.638759	0.52298	NA
CNAG_07594	1678.27	-0.309677	0.143055	-2.16474	0.0304076	0.329933
CNAG_04090	5408.88	-0.309368	0.280681	-1.1022	0.270373	0.689613
CNAG_07328	1584.77	-0.309234	0.159188	-1.94258	0.0520673	0.416666
CNAG_04385	31.3505	-0.309151	0.357379	-0.86505	0.387012	0.780581
CNAG_07800	2244.81	-0.309033	0.238336	-1.29663	0.194759	0.625777
CNAG_02210	1359.97	-0.308334	0.243033	-1.26869	0.204551	0.634004
CNAG_04041	2373.75	-0.307987	0.134722	-2.2861	0.0222486	0.28164
CNAG_00285	3299.23	-0.307531	0.209918	-1.465	0.14292	0.56788
CNAG_12716	599.365	-0.307494	0.156958	-1.95909	0.0501023	0.40772
CNAG_02407	4144.07	-0.307387	0.178377	-1.72324	0.0848453	0.485395
CNAG_05182	4330.94	-0.307332	0.204882	-1.50004	0.133604	0.562282
CNAG_05077	4605.76	-0.307313	0.231471	-1.32765	0.184294	0.617539
CNAG_00490	2465.6	-0.3073	0.107572	-2.85668	0.00428094	0.137245
CNAG_01682	20813.2	-0.307287	0.120791	-2.54396	0.0109603	0.211643
CNAG_02056	518.773	-0.307086	0.186912	-1.64295	0.100393	0.51519
CNAG_00337	6423.44	-0.307056	0.271821	-1.12962	0.258635	0.676711
CNAG_02995	4689.15	-0.306932	0.159997	-1.91836	0.0550652	0.425116
CNAG_12054	121.235	-0.306488	0.285224	-1.07455	0.282575	0.702035
CNAG_02467	4144.21	-0.306376	0.125394	-2.44331	0.0145534	0.236941
CNAG_02590	1122.85	-0.306252	0.202876	-1.50955	0.131158	0.5588
CNAG_00498	3260.67	-0.306134	0.0867146	-3.53036	0.000414992	0.0396963
CNAG_00136	12872.9	-0.305857	0.147621	-2.07191	0.0382737	0.367308
CNAG_13012	64.9768	-0.305808	0.278691	-1.0973	0.272511	0.691685
CNAG_06115	2335.9	-0.305798	0.125862	-2.42963	0.0151142	0.240748
CNAG_02834	2346.24	-0.305709	0.43921	-0.696043	0.486402	0.830175
CNAG_07447	347.123	-0.305631	0.343937	-0.888625	0.374205	0.772525
CNAG_06564	10303.6	-0.305124	0.134978	-2.26055	0.0237872	0.290956
CNAG_00493	4491.35	-0.305058	0.15918	-1.91644	0.0553091	0.426327
CNAG_12720	422.934	-0.304697	0.172608	-1.76525	0.0775212	0.473367
CNAG_06335	3407.05	-0.3042	0.180691	-1.68354	0.0922711	0.501268
CNAG_02497	1828.56	-0.30378	0.123821	-2.45338	0.0141522	0.234581
CNAG_00328	2937.61	-0.303556	0.202951	-1.49571	0.13473	0.56238
CNAG_13191	215.816	-0.303006	0.26747	-1.13286	0.257273	0.675574
CNAG_04690	866.98	-0.302906	0.21986	-1.37772	0.16829	0.596495
CNAG_00860	2556.35	-0.302853	0.161398	-1.87643	0.0605958	0.439695
CNAG_03881	2759.8	-0.302637	0.472318	-0.640749	0.521686	0.848312
CNAG_01257	5541.66	-0.302564	0.119538	-2.53111	0.0113703	0.216039
CNAG_02109	6599.61	-0.302475	0.120871	-2.50247	0.0123331	0.223595
CNAG_12286	1061.68	-0.302315	0.120716	-2.50434	0.0122679	0.223595
CNAG_06449	1710.13	-0.302133	0.135406	-2.23131	0.0256607	0.302281
CNAG_12101	162.766	-0.301808	0.253291	-1.19154	0.233441	0.657682
CNAG_01668	172.628	-0.301779	0.175868	-1.71594	0.0861729	0.488002
CNAG_01847	1780.22	-0.301717	0.344794	-0.875063	0.38154	0.776298
CNAG_06286	417.825	-0.301649	0.320068	-0.942452	0.345961	0.750983
CNAG_07338	779.825	-0.301297	0.323912	-0.930183	0.352276	0.756173
CNAG_03987	5896.44	-0.301101	0.226736	-1.32798	0.184184	0.617519
CNAG_03614	470.376	-0.301045	0.231799	-1.29873	0.194037	0.625082
CNAG_00122	2747.25	-0.300648	0.234448	-1.28236	0.199716	0.629789
CNAG_03792	1991.22	-0.300611	0.1742	-1.72567	0.0844074	0.485395
CNAG_12663	246.359	-0.30048	0.331422	-0.90664	0.364597	0.766182
CNAG_00627	939.457	-0.300356	0.214085	-1.40298	0.160624	0.587023
CNAG_01155	14806.4	-0.300214	0.190818	-1.5733	0.11565	0.539383
CNAG_00414	581.668	-0.300015	0.251498	-1.19291	0.232904	0.657682
CNAG_04658	817.051	-0.299477	0.417224	-0.717783	0.472891	0.823509
CNAG_03392	3271.28	-0.299251	0.0937192	-3.19306	0.00140772	0.0785073
CNAG_04316	3741.46	-0.298624	0.200217	-1.4915	0.13583	0.56331
CNAG_01275	5895.37	-0.298586	0.174369	-1.71238	0.086827	0.488991
CNAG_02420	367.376	-0.298404	0.257457	-1.15905	0.246437	0.666829
CNAG_00035	1036.03	-0.298185	0.150586	-1.98017	0.0476845	0.402336
CNAG_03742	8725.15	-0.297897	0.0769639	-3.87061	0.000108563	0.018421
CNAG_07499	6452.71	-0.29778	0.0895519	-3.32522	0.000883485	0.0572829
CNAG_06922	2096.98	-0.29767	0.242824	-1.22587	0.220247	0.649103
CNAG_06278	12486.5	-0.29721	0.139376	-2.13243	0.0329711	0.345072
CNAG_04461	763.512	-0.29665	0.205928	-1.44055	0.149711	0.575396
CNAG_04794	13293.8	-0.296416	0.147993	-2.0029	0.0451881	0.39082
CNAG_02457	12922.1	-0.295669	0.112707	-2.62334	0.00870724	0.187729
CNAG_02184	89.1256	-0.295659	0.307699	-0.96087	0.336618	0.744254
CNAG_04767	2043.18	-0.295502	0.16086	-1.83702	0.0662068	0.452442
CNAG_12312	53.4006	-0.295389	0.281855	-1.04802	0.294631	0.71635
CNAG_07634	6990.14	-0.295283	0.133025	-2.21976	0.0264352	0.308217
CNAG_06980	9237.94	-0.295228	0.121149	-2.4369	0.0148139	0.238009
CNAG_03314	3566.23	-0.295176	0.150625	-1.95968	0.0500337	0.407578
CNAG_12920	227.232	-0.294777	0.238213	-1.23745	0.215919	0.645626
CNAG_01987	3178.69	-0.294575	0.23921	-1.23145	0.218154	0.647123
CNAG_01924	1467.25	-0.294331	0.34904	-0.843259	0.399084	0.787016
CNAG_12722	655.05	-0.294194	0.191072	-1.5397	0.123634	0.548506
CNAG_12772	1118.36	-0.294044	0.283335	-1.03779	0.299366	0.720222
CNAG_03692	2809.88	-0.293587	0.324613	-0.904421	0.365772	0.766362
CNAG_12791	6.5212	-0.292804	0.479351	-0.610834	0.541309	NA
CNAG_12557	17.43	-0.29259	0.451406	-0.648175	0.516872	0.846077
CNAG_12767	150.825	-0.292578	0.280566	-1.04282	0.297034	0.718459
CNAG_03232	2055.07	-0.29244	0.405066	-0.721956	0.470322	0.822426
CNAG_01420	4429.98	-0.292048	0.182887	-1.59687	0.110294	0.532702
CNAG_07666	272.701	-0.291122	0.188847	-1.54157	0.123177	0.548155
CNAG_02312	2295.62	-0.290789	0.303939	-0.956736	0.3387	0.745332
CNAG_04150	3566.69	-0.290694	0.106419	-2.7316	0.00630268	0.16218
CNAG_12424	407.835	-0.290222	0.201016	-1.44377	0.148802	0.573285
CNAG_03696	2606.82	-0.28972	0.207956	-1.39318	0.163565	0.590325
CNAG_03824	12345.8	-0.289696	0.208693	-1.38814	0.165093	0.591584
CNAG_04874	8863.44	-0.289611	0.202441	-1.43059	0.152547	0.57849
CNAG_01769	3698.02	-0.28958	0.0758548	-3.81756	0.000134779	0.0210385
CNAG_01495	3897.31	-0.289229	0.117853	-2.45414	0.014122	0.234581
CNAG_01014	5848.65	-0.289196	0.0859612	-3.36427	0.000767471	0.0518693
CNAG_01052	23213.5	-0.289139	0.293594	-0.984825	0.32471	0.737594
CNAG_02070	15976.2	-0.289095	0.479302	-0.603159	0.546403	0.858777
CNAG_02989	2192.46	-0.289026	0.338727	-0.853272	0.393508	0.78397
CNAG_04879	13965.5	-0.288299	0.151845	-1.89863	0.057613	0.43333
CNAG_02696	3853.51	-0.288137	0.186091	-1.54836	0.121535	0.546041
CNAG_01487	913.344	-0.287886	0.168151	-1.71207	0.086884	0.488991
CNAG_12955	39.6672	-0.287536	0.270252	-1.06395	0.287349	0.707782
CNAG_02549	2182.67	-0.287529	0.244726	-1.1749	0.240033	0.664658
CNAG_03463	8431.9	-0.287454	0.147268	-1.95191	0.0509491	0.412507
CNAG_04117	1419.47	-0.287245	0.248841	-1.15433	0.248365	0.668723
CNAG_06307	456.274	-0.286913	0.218768	-1.3115	0.18969	0.622253
CNAG_03859	7621.97	-0.28651	0.166178	-1.72411	0.0846875	0.485395
CNAG_12326	947.635	-0.286465	0.194632	-1.47183	0.141066	0.565993
CNAG_06376	2485.38	-0.286164	0.20071	-1.42576	0.153938	0.579902
CNAG_12917	183.855	-0.285896	0.203073	-1.40785	0.159176	0.584867
CNAG_04176	12857.7	-0.28573	0.132913	-2.14975	0.0315751	0.336893
CNAG_07619	2633.88	-0.285456	0.253543	-1.12587	0.260221	0.679969
CNAG_07700	61.9075	-0.28543	0.406467	-0.702222	0.482541	0.828725
CNAG_05768	4814.84	-0.284905	0.158297	-1.79981	0.0718904	0.464608
CNAG_00187	2989.16	-0.284714	0.132281	-2.15234	0.0313705	0.335978
CNAG_12618	1296.04	-0.284401	0.162196	-1.75344	0.0795265	0.47668
CNAG_04634	7726.12	-0.284209	0.194556	-1.46081	0.144068	0.568222
CNAG_03142	24652.3	-0.284179	0.449587	-0.632089	0.527329	0.850698
CNAG_06244	2140.46	-0.284133	0.26036	-1.09131	0.275137	0.694594
CNAG_12071	26.9295	-0.284034	0.444825	-0.638531	0.523128	0.849088
CNAG_01040	1150.75	-0.283875	0.217541	-1.30493	0.191917	0.624714
CNAG_04227	4117.36	-0.283564	0.237896	-1.19197	0.233274	0.657682
CNAG_01263	21894.7	-0.283544	0.164134	-1.72752	0.0840742	0.485395
CNAG_07742	2.18305	-0.283305	0.431255	-0.656931	0.511225	NA
CNAG_02335	27455.2	-0.283237	0.316105	-0.896023	0.370241	0.769448
CNAG_05807	1445.29	-0.283053	0.260195	-1.08785	0.276662	0.696238
CNAG_01964	1818.1	-0.282519	0.121002	-2.33483	0.0195521	0.267284
CNAG_04083	1964.43	-0.282369	0.271078	-1.04165	0.297573	0.718481
CNAG_05634	4319.75	-0.282298	0.104675	-2.69691	0.00699852	0.169131
CNAG_02936	17991.2	-0.282294	0.160178	-1.76238	0.0780059	0.474883
CNAG_07479	4022.21	-0.282218	0.211574	-1.3339	0.182238	0.615564
CNAG_01252	819.409	-0.281924	0.317039	-0.88924	0.373874	0.772312
CNAG_03761	7319.89	-0.281532	0.104716	-2.68854	0.00717661	0.171184
CNAG_12335	794.661	-0.281417	0.172173	-1.63451	0.102153	0.518144
CNAG_06732	4479.65	-0.281023	0.22434	-1.25267	0.210327	0.640456
CNAG_06501	5990.44	-0.280695	0.155641	-1.80348	0.0713128	0.462236
CNAG_02681	3534.13	-0.280543	0.116227	-2.41376	0.015789	0.244026
CNAG_04253	3431.96	-0.280396	0.152633	-1.83706	0.0662008	0.452442
CNAG_03333	1968.09	-0.280093	0.476592	-0.5877	0.556733	0.861721
CNAG_12977	412.016	-0.280056	0.156431	-1.79029	0.0734076	0.467631
CNAG_12495	1.85106	-0.279878	0.453767	-0.616789	0.537374	NA
CNAG_13003	30.6936	-0.279845	0.34636	-0.80796	0.419114	0.799085
CNAG_13193	16.2722	-0.279692	0.462057	-0.605319	0.544967	0.858777
CNAG_12336	386.389	-0.279082	0.189281	-1.47443	0.140366	0.565993
CNAG_01912	11473.3	-0.279027	0.210444	-1.32589	0.184875	0.618706
CNAG_03404	1289.58	-0.278973	0.147197	-1.89523	0.0580619	0.433547
CNAG_07369	207.081	-0.277924	0.232264	-1.19659	0.231467	0.656529
CNAG_02867	9185.62	-0.277831	0.10826	-2.56633	0.0102781	0.20614
CNAG_02079	26937.5	-0.27739	0.129819	-2.13674	0.0326194	0.343676
CNAG_05031	7083.96	-0.277321	0.187591	-1.47833	0.13932	0.565185
CNAG_07347	6491.09	-0.277276	0.415364	-0.667549	0.504421	0.839825
CNAG_02205	1409.88	-0.277253	0.231465	-1.19782	0.230988	0.656458
CNAG_06508	38129.2	-0.277209	0.169621	-1.63428	0.1022	0.518144
CNAG_00043	2068.18	-0.27716	0.143196	-1.93553	0.0529248	0.418269
CNAG_05721	4331.63	-0.276822	0.115682	-2.39295	0.0167134	0.252043
CNAG_03600	1054.24	-0.27681	0.12299	-2.25067	0.0244064	0.295242
CNAG_12843	374.524	-0.276691	0.142771	-1.938	0.052623	0.417996
CNAG_07359	7138.4	-0.276608	0.222639	-1.2424	0.214088	0.643314
CNAG_04168	6195.79	-0.27612	0.0789798	-3.49609	0.00047213	0.0409265
CNAG_01815	7357.56	-0.276104	0.0818538	-3.37313	0.000743177	0.0512548
CNAG_12379	102.39	-0.275654	0.22898	-1.20383	0.228654	0.654245
CNAG_02357	3120.49	-0.275391	0.161067	-1.7098	0.087303	0.489621
CNAG_06301	11068	-0.275195	0.225881	-1.21832	0.223102	0.6505
CNAG_02006	1060.45	-0.274687	0.281584	-0.975507	0.329309	0.739902
CNAG_02000	2993.47	-0.274674	0.231467	-1.18666	0.235361	0.65805
CNAG_02397	655.811	-0.274672	0.183387	-1.49777	0.134193	0.56238
CNAG_00004	3156.88	-0.274626	0.112041	-2.45112	0.0142412	0.234581
CNAG_00925	1524.41	-0.274239	0.0884051	-3.10207	0.00192172	0.0917707
CNAG_01412	8235.26	-0.274179	0.147932	-1.85341	0.0638235	0.442217
CNAG_06008	1597.72	-0.274176	0.145769	-1.8809	0.0599861	0.439695
CNAG_03765	22855.5	-0.274161	0.225383	-1.21642	0.223825	0.650749
CNAG_05419	6176.46	-0.274096	0.111168	-2.46559	0.0136787	0.234581
CNAG_07939	10045.8	-0.27308	0.479394	-0.569635	0.568925	0.866142
CNAG_02753	7297.33	-0.272807	0.235487	-1.15848	0.246668	0.66684
CNAG_07898	418.823	-0.272608	0.190217	-1.43314	0.151817	0.577366
CNAG_03241	2711.2	-0.27259	0.127506	-2.13786	0.0325279	0.34359
CNAG_01208	6355.64	-0.272547	0.165204	-1.64976	0.0989917	0.513523
CNAG_01695	753.048	-0.272476	0.124601	-2.18679	0.028758	0.320433
CNAG_01640	14285.8	-0.272307	0.115405	-2.35957	0.0182959	0.26102
CNAG_02146	8.91503	-0.272016	0.453126	-0.600311	0.548299	NA
CNAG_02211	707.494	-0.271803	0.437864	-0.620748	0.534765	0.853531
CNAG_03421	653.66	-0.271754	0.132523	-2.05062	0.0403041	0.375059
CNAG_12323	433.248	-0.271605	0.1967	-1.38081	0.167338	0.594442
CNAG_07967	2113.21	-0.27137	0.219797	-1.23464	0.216964	0.645626
CNAG_12757	47.8001	-0.27137	0.295162	-0.919393	0.35789	0.75873
CNAG_03608	560.471	-0.271306	0.146345	-1.85388	0.0637558	0.442217
CNAG_07466	30247	-0.271252	0.187215	-1.44888	0.147372	0.570955
CNAG_03596	14466.3	-0.271211	0.110262	-2.45969	0.0139057	0.234581
CNAG_04018	8329.5	-0.271115	0.154276	-1.75734	0.0788607	0.47668
CNAG_04216	17.588	-0.271052	0.47778	-0.567316	0.5705	0.866142
CNAG_04446	962.73	-0.271041	0.137641	-1.9692	0.0489306	0.404375
CNAG_01464	33262.1	-0.270917	0.314191	-0.86227	0.388539	0.782277
CNAG_00250	4162	-0.270584	0.185401	-1.45945	0.14444	0.568565
CNAG_02170	390.387	-0.270572	0.208308	-1.29891	0.193976	0.625082
CNAG_01138	11658.2	-0.269987	0.16844	-1.60287	0.108964	0.531675
CNAG_02751	24901.5	-0.269754	0.442498	-0.609617	0.542116	0.857549
CNAG_12066	37.4664	-0.269677	0.430876	-0.625881	0.531393	0.85229
CNAG_04478	10476.2	-0.269496	0.173356	-1.55459	0.120045	0.543336
CNAG_05096	2926.51	-0.269218	0.185715	-1.44963	0.147162	0.570955
CNAG_02132	999.109	-0.269199	0.255803	-1.05237	0.292629	0.71433
CNAG_05172	7907.06	-0.269186	0.0970269	-2.77434	0.00553132	0.154061
CNAG_06117	2063.78	-0.268927	0.172848	-1.55586	0.119742	0.542579
CNAG_02265	9497.71	-0.268796	0.148517	-1.80986	0.0703168	0.460096
CNAG_00848	78117.9	-0.268759	0.465929	-0.576823	0.564059	0.864519
CNAG_07670	144.359	-0.268738	0.276772	-0.97097	0.331563	0.7413
CNAG_02993	2929.52	-0.268711	0.18183	-1.47781	0.139457	0.565185
CNAG_07652	3.96846	-0.268562	0.384843	-0.697848	0.485272	NA
CNAG_04746	1445.33	-0.268337	0.266311	-1.00761	0.313642	0.731245
CNAG_00274	2718.97	-0.268275	0.092477	-2.90099	0.00371984	0.128181
CNAG_12342	145.279	-0.267472	0.263078	-1.0167	0.309294	0.728253
CNAG_02655	4983.11	-0.267429	0.28875	-0.926163	0.354361	0.757001
CNAG_01575	13120.6	-0.267429	0.16836	-1.58844	0.112187	0.534783
CNAG_04275	377.279	-0.267416	0.398533	-0.671002	0.502219	0.838312
CNAG_04270	636.089	-0.267207	0.380401	-0.702436	0.482408	0.828725
CNAG_01422	4840.83	-0.267175	0.235804	-1.13304	0.257197	0.675574
CNAG_02541	12156.3	-0.26687	0.191915	-1.39056	0.164358	0.591231
CNAG_13181	208.745	-0.266618	0.268304	-0.993715	0.320362	0.734471
CNAG_04993	345.799	-0.266554	0.213397	-1.2491	0.211629	0.641543
CNAG_06289	2881.08	-0.266534	0.157642	-1.69075	0.090884	0.497802
CNAG_02114	8725.64	-0.26648	0.112095	-2.37726	0.0174418	0.256913
CNAG_07876	286.967	-0.266208	0.315438	-0.843931	0.398708	0.786747
CNAG_12117	972.479	-0.266173	0.172526	-1.54279	0.122881	0.548025
CNAG_12647	1331.82	-0.265473	0.141542	-1.87558	0.0607127	0.439695
CNAG_01807	3289.72	-0.265439	0.241622	-1.09857	0.271956	0.690936
CNAG_02156	5335.53	-0.265258	0.214734	-1.23529	0.216724	0.645626
CNAG_03684	7865.41	-0.264832	0.0769124	-3.44329	0.000574687	0.0451406
CNAG_02004	7347.2	-0.264135	0.250065	-1.05626	0.290848	0.712162
CNAG_07513	4859.1	-0.264127	0.126122	-2.09421	0.0362409	0.359598
CNAG_01478	1594.27	-0.263709	0.1833	-1.43867	0.150243	0.575499
CNAG_02662	2976.87	-0.263672	0.161302	-1.63465	0.102122	0.518144
CNAG_01360	10504.3	-0.263644	0.11506	-2.29136	0.0219425	0.280047
CNAG_12980	17.4261	-0.263452	0.4405	-0.598075	0.54979	0.859232
CNAG_05703	6732.54	-0.263432	0.129888	-2.02815	0.0425445	0.379946
CNAG_07963	167.875	-0.263403	0.194895	-1.35151	0.176532	0.60828
CNAG_03888	5937.25	-0.263089	0.0909782	-2.89179	0.00383058	0.128995
CNAG_12589	3.26091	-0.262581	0.48577	-0.540546	0.588821	NA
CNAG_05903	3043.47	-0.262242	0.178758	-1.46703	0.142369	0.567697
CNAG_03924	525.214	-0.262066	0.182613	-1.43509	0.151262	0.577195
CNAG_05195	5661.71	-0.262032	0.13049	-2.00807	0.0446363	0.388197
CNAG_12009	387.305	-0.26199	0.215499	-1.21573	0.224087	0.651101
CNAG_03504	2854.98	-0.261714	0.14326	-1.82685	0.0677224	0.454147
CNAG_01574	20352.6	-0.26158	0.1451	-1.80275	0.0714272	0.462363
CNAG_07124	205.915	-0.261558	0.281928	-0.927749	0.353538	0.757001
CNAG_05334	215.869	-0.261548	0.211155	-1.23865	0.215474	0.645626
CNAG_03839	7568.02	-0.261545	0.118512	-2.20691	0.0273202	0.312147
CNAG_04939	2938.93	-0.261136	0.110952	-2.35359	0.0185931	0.263375
CNAG_01570	114.492	-0.26087	0.249131	-1.04712	0.295045	0.71635
CNAG_01777	5079.09	-0.260858	0.170314	-1.53163	0.125613	0.551351
CNAG_07470	9314.7	-0.260607	0.126329	-2.06292	0.0391201	0.369782
CNAG_04944	7782.06	-0.259753	0.149011	-1.74318	0.0813024	0.479222
CNAG_02850	19740.1	-0.25971	0.202333	-1.28358	0.199288	0.629186
CNAG_03213	9470.45	-0.259501	0.125735	-2.06388	0.0390295	0.369782
CNAG_00313	3430.47	-0.25949	0.116408	-2.22915	0.0258039	0.30352
CNAG_03768	3349.18	-0.259293	0.0955837	-2.71273	0.00667319	0.16683
CNAG_02072	2568.6	-0.259262	0.337359	-0.768505	0.442187	0.810558
CNAG_01827	575.574	-0.259259	0.207335	-1.25044	0.21114	0.641219
CNAG_02690	1238.16	-0.258601	0.222967	-1.15982	0.246123	0.666829
CNAG_03639	530.742	-0.258531	0.207879	-1.24366	0.213625	0.643248
CNAG_06552	3284.55	-0.258339	0.09264	-2.78864	0.00529304	0.151297
CNAG_06503	71.4749	-0.257756	0.227907	-1.13097	0.258068	0.676113
CNAG_02358	662.295	-0.257703	0.166574	-1.54707	0.121846	0.546216
CNAG_07769	16949.4	-0.25753	0.181975	-1.41519	0.157012	0.584083
CNAG_00413	8306.6	-0.257508	0.150497	-1.71105	0.0870716	0.489356
CNAG_05449	10662.4	-0.257494	0.238519	-1.07955	0.280341	0.699999
CNAG_01532	15249.2	-0.257363	0.1747	-1.47317	0.140704	0.565993
CNAG_07108	7382.93	-0.257145	0.0962555	-2.67149	0.00755157	0.175579
CNAG_03422	3600.35	-0.256722	0.157177	-1.63333	0.102401	0.518504
CNAG_07377	12593.4	-0.256518	0.190047	-1.34976	0.177091	0.60828
CNAG_01095	2431.27	-0.2561	0.19634	-1.30437	0.192108	0.624714
CNAG_07629	3066.78	-0.255939	0.278442	-0.919179	0.358002	0.75873
CNAG_13139	36.2551	-0.255931	0.365135	-0.700921	0.483352	0.829154
CNAG_05977	12883.9	-0.255639	0.144248	-1.77221	0.0763595	0.472067
CNAG_13042	117.145	-0.254867	0.329304	-0.773957	0.438956	0.809217
CNAG_01169	2521.37	-0.254751	0.11727	-2.17234	0.0298301	0.325884
CNAG_00148	8645.36	-0.254407	0.178384	-1.42618	0.153817	0.579902
CNAG_02822	16584.9	-0.254121	0.155813	-1.63094	0.102904	0.520025
CNAG_01240	2300.42	-0.254087	0.0741224	-3.42794	0.000608174	0.0457053
CNAG_07998	3608.56	-0.253851	0.125745	-2.01877	0.0435107	0.385553
CNAG_03128	2587.3	-0.253695	0.201811	-1.25709	0.20872	0.63751
CNAG_02509	594.034	-0.253662	0.15804	-1.60505	0.108482	0.531578
CNAG_00879	28771.8	-0.253638	0.171214	-1.48141	0.138497	0.565185
CNAG_06727	2614.2	-0.253593	0.158865	-1.59628	0.110425	0.532702
CNAG_12738	1360.77	-0.253581	0.338046	-0.750138	0.453171	0.815168
CNAG_12726	283.722	-0.253545	0.298979	-0.848035	0.396418	0.784993
CNAG_04458	1980	-0.253527	0.126122	-2.01017	0.0444132	0.387099
CNAG_07659	13480	-0.253516	0.0905373	-2.80012	0.00510834	0.149227
CNAG_05388	1452.54	-0.253469	0.42459	-0.596974	0.550525	0.859232
CNAG_12416	110.845	-0.252952	0.209757	-1.20593	0.227845	0.653619
CNAG_00635	13290.1	-0.252896	0.164593	-1.53649	0.124417	0.548506
CNAG_04792	4343.84	-0.252724	0.166873	-1.51447	0.129906	0.557947
CNAG_04621	9124.27	-0.252024	0.147019	-1.71423	0.0864862	0.488475
CNAG_05855	2269.2	-0.251914	0.267827	-0.940584	0.346918	0.752221
CNAG_07538	18000	-0.25161	0.137243	-1.83332	0.066755	0.453491
CNAG_00960	8594.84	-0.251467	0.0948432	-2.6514	0.00801581	0.182059
CNAG_12705	17.5785	-0.251362	0.426215	-0.589754	0.555356	0.860646
CNAG_07319	3914.93	-0.251358	0.383266	-0.655832	0.511933	0.843769
CNAG_04920	5490.78	-0.251289	0.263018	-0.955403	0.339374	0.745775
CNAG_12038	36.602	-0.251031	0.417156	-0.601769	0.547328	0.858777
CNAG_05650	20455.2	-0.25071	0.0967271	-2.59193	0.00954403	0.197737
CNAG_00453	4105.95	-0.250643	0.457852	-0.547431	0.584082	0.871488
CNAG_06030	2138.69	-0.250517	0.200713	-1.24813	0.211982	0.641543
CNAG_05671	2149.7	-0.250081	0.245696	-1.01785	0.308749	0.727622
CNAG_00696	5624.04	-0.249953	0.217863	-1.14729	0.251261	0.670806
CNAG_06349	347.265	-0.249815	0.195126	-1.28027	0.200449	0.630852
CNAG_03465	753.725	-0.249105	0.148007	-1.68306	0.0923643	0.501305
CNAG_04296	431.666	-0.249044	0.331254	-0.751822	0.452158	0.815168
CNAG_12804	14.0869	-0.248853	0.472286	-0.526912	0.598254	0.878652
CNAG_04888	1142.91	-0.248697	0.204611	-1.21546	0.224191	0.651101
CNAG_00666	14784.8	-0.248687	0.17604	-1.41267	0.157752	0.584083
CNAG_05652	9169.19	-0.248319	0.176478	-1.40708	0.159404	0.584867
CNAG_07755	1052.11	-0.2481	0.240315	-1.03239	0.301887	0.722231
CNAG_12196	62.861	-0.248045	0.410298	-0.604549	0.545479	0.858777
CNAG_03113	22569.7	-0.247847	0.317365	-0.780953	0.43483	0.806523
CNAG_00738	115.967	-0.247604	0.214508	-1.15429	0.248382	0.668723
CNAG_01561	4281.17	-0.247595	0.148534	-1.66692	0.0955302	0.50833
CNAG_06603	3776.12	-0.247277	0.0937856	-2.63662	0.00837365	0.183967
CNAG_01543	2272.74	-0.247253	0.137701	-1.79558	0.0725616	0.465885
CNAG_03155	1702.77	-0.246854	0.163409	-1.51065	0.130877	0.5588
CNAG_06282	2823.9	-0.246703	0.147728	-1.66998	0.0949229	0.507969
CNAG_12676	2422.51	-0.246672	0.156222	-1.57899	0.114339	0.536561
CNAG_12515	1305.04	-0.246211	0.119022	-2.06861	0.0385827	0.36869
CNAG_12891	342.801	-0.24611	0.230069	-1.06972	0.284745	0.70523
CNAG_07505	237.911	-0.246057	0.230915	-1.06558	0.286615	0.706984
CNAG_00110	2213.53	-0.246018	0.241118	-1.02032	0.307577	0.726792
CNAG_02816	10503.5	-0.245778	0.11511	-2.13515	0.0327484	0.344095
CNAG_05147	13083.7	-0.245629	0.210316	-1.16791	0.242845	0.665367
CNAG_07585	6.45356	-0.245565	0.479223	-0.512424	0.608354	NA
CNAG_00061	40436.8	-0.245521	0.0621136	-3.95277	7.7251e-05	0.0141113
CNAG_05308	5701.3	-0.245287	0.116736	-2.10122	0.0356215	0.355992
CNAG_05496	8252.2	-0.245279	0.167397	-1.46525	0.142852	0.56788
CNAG_00507	172.176	-0.24524	0.268393	-0.913733	0.360857	0.760929
CNAG_02684	77521.4	-0.245212	0.274241	-0.894146	0.371244	0.770005
CNAG_00751	249.395	-0.245202	0.233216	-1.0514	0.293076	0.714461
CNAG_01408	3432.38	-0.244789	0.167404	-1.46226	0.14367	0.568064
CNAG_00470	667.668	-0.244493	0.172652	-1.4161	0.156746	0.584083
CNAG_02124	1461.35	-0.24406	0.202158	-1.20727	0.227327	0.653488
CNAG_04570	16135.4	-0.243939	0.131087	-1.86089	0.0627593	0.442217
CNAG_00787	2537.21	-0.24387	0.11565	-2.10869	0.0349712	0.353978
CNAG_07314	2524.52	-0.243727	0.131371	-1.85526	0.0635591	0.442217
CNAG_05066	659.054	-0.243415	0.213742	-1.13883	0.254776	0.674266
CNAG_06371	1932.8	-0.243111	0.216101	-1.12499	0.260595	0.680387
CNAG_12443	1014.43	-0.243008	0.117641	-2.06567	0.0388594	0.368985
CNAG_02721	2762.79	-0.242924	0.335145	-0.724832	0.468555	0.821789
CNAG_00155	0.781582	-0.242604	0.175624	-1.38139	NA	NA
CNAG_07375	6004.11	-0.242602	0.0937423	-2.58796	0.00965455	0.198953
CNAG_12734	604.07	-0.242504	0.212601	-1.14065	0.254016	0.674209
CNAG_00799	75225.6	-0.242373	0.085118	-2.84749	0.00440654	0.138471
CNAG_07709	11.4471	-0.242045	0.484267	-0.499819	0.617203	0.885446
CNAG_02095	10806.2	-0.24159	0.169215	-1.42771	0.153376	0.579703
CNAG_12958	457.417	-0.241373	0.203468	-1.18629	0.235507	0.65805
CNAG_05834	3473.06	-0.241253	0.127174	-1.89703	0.0578241	0.43333
CNAG_03794	2737.17	-0.241241	0.265569	-0.908391	0.363672	0.765044
CNAG_00107	1527.48	-0.241219	0.351923	-0.685432	0.493071	0.83249
CNAG_12635	4.31736	-0.241184	0.402288	-0.59953	0.548819	NA
CNAG_04833	1442.84	-0.241023	0.445064	-0.541547	0.58813	0.873813
CNAG_00073	8001.66	-0.240499	0.142089	-1.69259	0.0905334	0.497231
CNAG_07350	1593.26	-0.240337	0.252902	-0.950319	0.34195	0.747251
CNAG_12397	198.901	-0.24033	0.221884	-1.08313	0.27875	0.698846
CNAG_04981	34682.8	-0.240263	0.471528	-0.509542	0.610372	0.882708
CNAG_03452	1245.99	-0.240236	0.16329	-1.47122	0.141232	0.565993
CNAG_02453	5477.14	-0.240187	0.104367	-2.30136	0.0213711	0.275338
CNAG_02568	8471.23	-0.239802	0.235341	-1.01896	0.308224	0.727245
CNAG_02058	424.244	-0.23958	0.270485	-0.885744	0.375755	0.773794
CNAG_01824	9423.02	-0.239541	0.101652	-2.35648	0.0184492	0.261801
CNAG_07971	964.122	-0.239524	0.234735	-1.0204	0.30754	0.726792
CNAG_01727	53058.4	-0.2395	0.137653	-1.73988	0.0818802	0.480496
CNAG_04386	961.061	-0.239437	0.435793	-0.549428	0.582711	0.871018
CNAG_03500	3961.03	-0.239305	0.263925	-0.906715	0.364557	0.766182
CNAG_13110	2915.99	-0.239219	0.11941	-2.00334	0.045141	0.39082
CNAG_04773	688.314	-0.23921	0.208577	-1.14687	0.251436	0.670806
CNAG_03492	41096.9	-0.238981	0.475722	-0.502355	0.615418	0.884539
CNAG_06577	4362.64	-0.238487	0.440423	-0.541495	0.588166	0.873813
CNAG_04861	17029.4	-0.238385	0.102595	-2.32355	0.0201498	0.267993
CNAG_04476	1859.22	-0.238258	0.228211	-1.04402	0.296474	0.717566
CNAG_00970	7440.41	-0.238209	0.106274	-2.24146	0.0249961	0.297901
CNAG_05168	283.047	-0.237932	0.414622	-0.573853	0.566067	0.865761
CNAG_00308	2179.4	-0.237724	0.150981	-1.57453	0.115364	0.538976
CNAG_07339	2213.01	-0.237623	0.194187	-1.22368	0.221074	0.64914
CNAG_04755	33596	-0.237507	0.155644	-1.52597	0.127018	0.553836
CNAG_02264	4313.8	-0.237481	0.191765	-1.2384	0.215568	0.645626
CNAG_02499	12.1383	-0.237212	0.463047	-0.512285	0.608451	0.882254
CNAG_04903	6665.99	-0.237117	0.476617	-0.497501	0.618836	0.885876
CNAG_12225	81.5639	-0.237094	0.464523	-0.510402	0.60977	0.882708
CNAG_02723	3050.36	-0.237011	0.0871694	-2.71897	0.0065485	0.164745
CNAG_01196	3348.78	-0.236817	0.0993904	-2.38269	0.0171866	0.255292
CNAG_02547	11795.4	-0.236694	0.145821	-1.62318	0.104552	0.524402
CNAG_04711	273.147	-0.236681	0.163217	-1.4501	0.147031	0.570955
CNAG_03450	4810.52	-0.236564	0.12677	-1.86608	0.0620301	0.442217
CNAG_04201	1143.92	-0.23646	0.231027	-1.02351	0.306065	0.725405
CNAG_03157	3049.69	-0.236394	0.0977877	-2.41742	0.0156311	0.243433
CNAG_00468	5420.99	-0.236163	0.132434	-1.78326	0.0745447	0.469365
CNAG_07791	351.069	-0.236141	0.204557	-1.1544	0.248336	0.668723
CNAG_02942	7276.63	-0.235766	0.322186	-0.73177	0.464309	0.818827
CNAG_12820	326.457	-0.235647	0.143185	-1.64575	0.0998145	0.514868
CNAG_06973	1307.39	-0.235569	0.179471	-1.31258	0.189326	0.621859
CNAG_05532	1159.74	-0.235563	0.141587	-1.66373	0.0961657	0.508571
CNAG_03942	9738.35	-0.235101	0.103501	-2.27147	0.0231184	0.285869
CNAG_05866	4126.57	-0.235037	0.132976	-1.76751	0.0771422	0.473367
CNAG_04485	16149.6	-0.235003	0.106963	-2.19705	0.0280167	0.317342
CNAG_03916	27143.9	-0.234895	0.0685086	-3.4287	0.00060649	0.0457053
CNAG_03554	24655.6	-0.234799	0.0867276	-2.70731	0.00678302	0.167996
CNAG_01922	2753.24	-0.23472	0.131285	-1.78786	0.0737979	0.468581
CNAG_04740	4531.77	-0.234683	0.108581	-2.16137	0.0306668	0.330945
CNAG_12853	532.323	-0.23465	0.16748	-1.40106	0.161195	0.58727
CNAG_00995	13423.5	-0.234403	0.464422	-0.50472	0.613756	0.884011
CNAG_00321	1022.9	-0.233854	0.158264	-1.47762	0.13951	0.565185
CNAG_12452	132.574	-0.233694	0.315285	-0.741216	0.458563	0.817684
CNAG_02387	3393.92	-0.233582	0.151036	-1.54653	0.121977	0.546499
CNAG_05032	2841.28	-0.23347	0.135482	-1.72325	0.0848426	0.485395
CNAG_01850	11850.5	-0.233133	0.128705	-1.81137	0.0700836	0.459635
CNAG_02939	1823.45	-0.233046	0.193047	-1.2072	0.227356	0.653488
CNAG_07718	9487.61	-0.23293	0.158946	-1.46547	0.142793	0.56788
CNAG_07793	2969.91	-0.232828	0.0920491	-2.52939	0.0114262	0.216039
CNAG_01087	4890.6	-0.232825	0.103979	-2.23915	0.0251462	0.297901
CNAG_01053	7023.54	-0.232746	0.157428	-1.47843	0.139293	0.565185
CNAG_01063	6445.49	-0.232454	0.1004	-2.31529	0.020597	0.268731
CNAG_12933	226.73	-0.23224	0.421267	-0.551289	0.581436	0.870135
CNAG_08000	2540.76	-0.231903	0.154265	-1.50328	0.132768	0.56171
CNAG_03443	102.517	-0.231739	0.335327	-0.691081	0.489514	0.831683
CNAG_01848	7556.54	-0.231729	0.107624	-2.15313	0.0313085	0.335978
CNAG_06561	87.3318	-0.231583	0.230639	-1.00409	0.315333	0.732161
CNAG_01525	1057.26	-0.23158	0.25399	-0.911769	0.36189	0.762127
CNAG_04870	178.991	-0.231563	0.207274	-1.11718	0.263917	0.6838
CNAG_12279	6.44825	-0.231229	0.482165	-0.479563	0.631538	NA
CNAG_05739	2276.9	-0.231052	0.150561	-1.53461	0.12488	0.549555
CNAG_04575	9380.52	-0.231005	0.136437	-1.69313	0.0904304	0.497231
CNAG_01750	14289.6	-0.230863	0.307236	-0.751419	0.452401	0.815168
CNAG_06217	1127.45	-0.23066	0.154384	-1.49407	0.135158	0.56238
CNAG_02341	5071.56	-0.230393	0.128745	-1.78953	0.0735301	0.467999
CNAG_07344	2118.55	-0.230159	0.111843	-2.05787	0.0396025	0.37288
CNAG_03517	15163.5	-0.230137	0.158001	-1.45655	0.145241	0.568952
CNAG_12697	354.425	-0.229854	0.159154	-1.44423	0.148675	0.573285
CNAG_00777	9259.16	-0.229512	0.13257	-1.73126	0.0834052	0.483959
CNAG_02160	243.469	-0.229354	0.188361	-1.21763	0.223365	0.6505
CNAG_02969	1604.86	-0.229286	0.246122	-0.931593	0.351547	0.756173
CNAG_03626	3535.49	-0.229241	0.119296	-1.92162	0.0546539	0.424819
CNAG_05083	4098.47	-0.228925	0.151955	-1.50654	0.131929	0.559349
CNAG_00980	450.258	-0.228769	0.344604	-0.663861	0.50678	0.841642
CNAG_00024	46780.8	-0.228146	0.142393	-1.60223	0.109105	0.531675
CNAG_01526	7271.54	-0.228126	0.180494	-1.2639	0.206268	0.636283
CNAG_01690	1895.24	-0.228039	0.289482	-0.787749	0.430844	0.80359
CNAG_01173	4043.54	-0.227712	0.099471	-2.28923	0.0220658	0.280661
CNAG_02027	4154.98	-0.227641	0.168428	-1.35156	0.176515	0.60828
CNAG_06550	8368.61	-0.227606	0.165502	-1.37525	0.169055	0.597841
CNAG_04344	784.253	-0.227401	0.127253	-1.787	0.0739372	0.469092
CNAG_06639	7803.88	-0.227323	0.083027	-2.73795	0.0061824	0.161761
CNAG_04763	7284.86	-0.22707	0.106964	-2.12287	0.033765	0.347453
CNAG_00464	12542.7	-0.226847	0.0635384	-3.57023	0.000356668	0.036467
CNAG_00747	20553.6	-0.226835	0.0751669	-3.01776	0.00254655	0.101544
CNAG_05184	133.605	-0.22673	0.210303	-1.07811	0.280986	0.700065
CNAG_12355	134.785	-0.226721	0.229174	-0.9893	0.322516	0.73561
CNAG_00445	5265.37	-0.226645	0.122023	-1.8574	0.0632538	0.442217
CNAG_02253	8.48081	-0.226628	0.485824	-0.466483	0.64087	NA
CNAG_03786	1079.54	-0.226307	0.120963	-1.87088	0.0613613	0.441586
CNAG_06507	2258.23	-0.22627	0.188054	-1.20322	0.228891	0.654245
CNAG_06300	5646.75	-0.226198	0.127431	-1.77506	0.0758882	0.471713
CNAG_05057	5432.81	-0.226155	0.110825	-2.04064	0.0412867	0.376729
CNAG_01195	7361.66	-0.226088	0.127863	-1.76821	0.0770253	0.473367
CNAG_03418	16045.8	-0.225615	0.110893	-2.03452	0.0418992	0.377566
CNAG_02682	2046.98	-0.225428	0.210282	-1.07203	0.283707	0.703752
CNAG_05736	196.382	-0.22532	0.315692	-0.713735	0.475391	0.824106
CNAG_05965	905.771	-0.22498	0.197412	-1.13965	0.254432	0.674209
CNAG_01653	26315.3	-0.224633	0.297944	-0.753945	0.450882	0.815168
CNAG_00162	23714.6	-0.224437	0.452629	-0.495851	0.619999	0.886587
CNAG_05470	2240.2	-0.224272	0.131575	-1.70452	0.0882835	0.492006
CNAG_04291	4115.48	-0.224224	0.110633	-2.02675	0.0426883	0.380543
CNAG_02977	11842.1	-0.224057	0.147501	-1.51902	0.128757	0.557153
CNAG_03769	18461.7	-0.223799	0.176104	-1.27083	0.203788	0.63365
CNAG_02445	3809.33	-0.223731	0.137572	-1.62628	0.103891	0.523391
CNAG_01251	11909.7	-0.223641	0.148937	-1.50158	0.133206	0.562282
CNAG_02940	4903.46	-0.223606	0.124349	-1.79821	0.0721444	0.464743
CNAG_03197	946.409	-0.223553	0.16063	-1.39173	0.164006	0.590761
CNAG_06364	14121.9	-0.223311	0.134113	-1.66509	0.0958948	0.508516
CNAG_06205	19570.9	-0.223289	0.0964604	-2.31483	0.0206224	0.268731
CNAG_05907	20202.4	-0.223208	0.0936817	-2.38261	0.0171902	0.255292
CNAG_13017	563.35	-0.223051	0.140691	-1.5854	0.112876	0.535827
CNAG_02767	1075.21	-0.222705	0.139291	-1.59885	0.109854	0.532702
CNAG_07411	15583.4	-0.222674	0.12031	-1.85084	0.0641923	0.443233
CNAG_00866	12679.7	-0.222559	0.206989	-1.07522	0.282276	0.701711
CNAG_02206	142.138	-0.222553	0.340913	-0.652814	0.513876	0.845505
CNAG_01165	2579.49	-0.222232	0.191595	-1.1599	0.246088	0.666829
CNAG_06576	75663.3	-0.222178	0.45483	-0.488485	0.625206	0.889178
CNAG_02864	2357.77	-0.222155	0.485832	-0.457268	0.647478	0.897712
CNAG_12819	6.0623	-0.222069	0.437682	-0.507375	0.611892	NA
CNAG_06585	17552.6	-0.222048	0.0986776	-2.25024	0.0244338	0.295242
CNAG_06435	3555.39	-0.22186	0.0848589	-2.61446	0.00893682	0.190565
CNAG_06389	11187.4	-0.22175	0.230262	-0.963035	0.33553	0.744119
CNAG_03830	183.512	-0.22169	0.315506	-0.702648	0.482275	0.828725
CNAG_12095	392.198	-0.221635	0.1772	-1.25076	0.211021	0.641219
CNAG_12825	991.457	-0.221596	0.14316	-1.54789	0.121649	0.546041
CNAG_00050	784.92	-0.221515	0.221018	-1.00225	0.316225	0.732161
CNAG_12033	39.1624	-0.221438	0.374736	-0.590919	0.554575	0.860646
CNAG_06566	3643.62	-0.221402	0.159779	-1.38568	0.165845	0.591809
CNAG_00757	3772.07	-0.221021	0.132949	-1.66246	0.0964212	0.508571
CNAG_03052	14721.1	-0.221012	0.0786207	-2.81111	0.00493704	0.146368
CNAG_06220	73761.7	-0.221005	0.182945	-1.20804	0.227032	0.653488
CNAG_05104	313.45	-0.220899	0.152562	-1.44793	0.147637	0.571001
CNAG_03726	6112.17	-0.220744	0.0955524	-2.31018	0.020878	0.270815
CNAG_03967	2918.91	-0.220335	0.17504	-1.25877	0.208114	0.637086
CNAG_12731	354.507	-0.220191	0.244968	-0.898852	0.368731	0.76876
CNAG_02724	3020.25	-0.220154	0.225834	-0.974849	0.329635	0.739902
CNAG_12646	35.2631	-0.219996	0.436629	-0.50385	0.614367	0.884042
CNAG_07851	12115.9	-0.219705	0.0834004	-2.63434	0.00843017	0.184699
CNAG_03445	1529	-0.219697	0.210718	-1.04261	0.297129	0.718459
CNAG_12305	170.3	-0.219523	0.292953	-0.749345	0.453649	0.815187
CNAG_12051	462.839	-0.219491	0.224488	-0.97774	0.328203	0.739654
CNAG_04587	9395.94	-0.219326	0.472906	-0.463783	0.642803	0.895433
CNAG_12584	75.2855	-0.219158	0.382942	-0.5723	0.567119	0.865934
CNAG_04730	6936.31	-0.219086	0.136752	-1.60207	0.10914	0.531675
CNAG_01903	2455.85	-0.218655	0.242759	-0.90071	0.367742	0.767936
CNAG_12990	18.9158	-0.218529	0.433472	-0.504137	0.614165	0.884011
CNAG_07584	424.28	-0.218526	0.246972	-0.884823	0.376252	0.774352
CNAG_05581	28355.7	-0.218475	0.135162	-1.6164	0.106009	0.526806
CNAG_12341	136.139	-0.218379	0.287974	-0.758329	0.448254	0.815168
CNAG_06971	10384.9	-0.218224	0.124074	-1.75883	0.0786066	0.47668
CNAG_01229	2770.88	-0.217933	0.1687	-1.29184	0.196413	0.627309
CNAG_12005	312.975	-0.217932	0.211047	-1.03262	0.30178	0.722231
CNAG_01388	3551.55	-0.217901	0.0839054	-2.59698	0.00940462	0.196855
CNAG_04393	7445.39	-0.217877	0.0848539	-2.56767	0.0102386	0.20614
CNAG_01130	14677.8	-0.217836	0.140732	-1.54787	0.121652	0.546041
CNAG_03543	4226.01	-0.217714	0.164908	-1.32021	0.186764	0.620672
CNAG_05460	1062.19	-0.217646	0.153903	-1.41418	0.157309	0.584083
CNAG_12873	1165.07	-0.217624	0.125204	-1.73816	0.0821833	0.481566
CNAG_13023	69.5151	-0.217181	0.321382	-0.675771	0.499186	0.835995
CNAG_06923	139930	-0.217147	0.211043	-1.02892	0.303515	0.724674
CNAG_02691	1625	-0.216914	0.147244	-1.47316	0.140708	0.565993
CNAG_01655	10741.9	-0.216417	0.0886793	-2.44045	0.014669	0.237366
CNAG_12304	396.335	-0.216319	0.148422	-1.45746	0.14499	0.568952
CNAG_03110	10473.2	-0.216206	0.213406	-1.01312	0.311003	0.728627
CNAG_03086	3377.97	-0.216205	0.114145	-1.89413	0.0582082	0.433842
CNAG_01091	12951.6	-0.216185	0.0817267	-2.64522	0.00816369	0.182695
CNAG_06828	5362.62	-0.21553	0.115955	-1.85874	0.0630636	0.442217
CNAG_01298	10643.3	-0.215517	0.125364	-1.71913	0.0855903	0.486517
CNAG_05723	4793.58	-0.215383	0.335277	-0.642404	0.520611	0.847494
CNAG_02339	242.335	-0.215313	0.220307	-0.977329	0.328406	0.739654
CNAG_12201	423.073	-0.215188	0.176713	-1.21772	0.22333	0.6505
CNAG_12942	797.369	-0.215034	0.120703	-1.78151	0.0748284	0.469517
CNAG_05454	1469.25	-0.215032	0.12922	-1.66408	0.096097	0.508571
CNAG_02360	4481.26	-0.214983	0.115386	-1.86317	0.0624388	0.442217
CNAG_06448	395.973	-0.214867	0.122533	-1.75354	0.0795096	0.47668
CNAG_00115	10337.1	-0.214689	0.184365	-1.16448	0.244231	0.666525
CNAG_07002	1640.3	-0.214594	0.0838117	-2.56043	0.0104544	0.207397
CNAG_01759	462.16	-0.214545	0.166643	-1.28745	0.197937	0.628357
CNAG_02426	7336.76	-0.214433	0.084774	-2.52947	0.0114235	0.216039
CNAG_02763	7343.51	-0.214203	0.0701922	-3.05166	0.00227581	0.098326
CNAG_02029	954.273	-0.213783	0.345457	-0.618841	0.536021	0.854471
CNAG_00254	1426.37	-0.213446	0.317353	-0.672582	0.501213	0.837588
CNAG_05356	180.072	-0.213266	0.241908	-0.881603	0.377992	0.77541
CNAG_02915	8931.73	-0.213233	0.11353	-1.8782	0.0603532	0.439695
CNAG_04816	1711.71	-0.213024	0.227276	-0.93729	0.348609	0.753635
CNAG_03825	201.363	-0.213012	0.262227	-0.812319	0.416609	0.798484
CNAG_04314	5909.2	-0.212854	0.272827	-0.78018	0.435285	0.806523
CNAG_02018	1072.19	-0.21281	0.0878195	-2.42327	0.0153817	0.242429
CNAG_04979	3032.08	-0.212739	0.0763859	-2.78506	0.00535174	0.152387
CNAG_02166	17364.4	-0.212714	0.0948099	-2.24358	0.0248594	0.297232
CNAG_12421	2309.39	-0.212146	0.106512	-1.99175	0.0463981	0.396172
CNAG_02557	1666.68	-0.212063	0.174447	-1.21563	0.224125	0.651101
CNAG_07509	4078.06	-0.211887	0.128293	-1.65158	0.0986196	0.513523
CNAG_01642	7241.89	-0.21179	0.094605	-2.23868	0.0251768	0.297901
CNAG_02460	2475.61	-0.211747	0.228872	-0.925177	0.354874	0.757111
CNAG_07809	244.679	-0.211703	0.192652	-1.09889	0.271817	0.690936
CNAG_04768	5995.87	-0.211364	0.103461	-2.04294	0.0410582	0.376367
CNAG_03163	3343.66	-0.211136	0.161688	-1.30583	0.191612	0.624714
CNAG_07706	3416.89	-0.211056	0.0885558	-2.38331	0.0171578	0.255292
CNAG_01485	4972.96	-0.210868	0.153131	-1.37704	0.168499	0.596696
CNAG_01996	3383.38	-0.210809	0.142158	-1.48292	0.138095	0.565185
CNAG_06955	86.4897	-0.210111	0.246124	-0.85368	0.393282	0.783714
CNAG_04691	312.33	-0.210043	0.349268	-0.601382	0.547586	0.858777
CNAG_00835	1175.43	-0.209994	0.098316	-2.13591	0.0326867	0.343901
CNAG_12065	263.191	-0.209977	0.200679	-1.04633	0.295408	0.71635
CNAG_05042	1692.73	-0.209916	0.121583	-1.72652	0.0842542	0.485395
CNAG_00335	2267.05	-0.209867	0.0798863	-2.62708	0.00861223	0.186752
CNAG_12367	200.176	-0.209853	0.227163	-0.923797	0.355592	0.757188
CNAG_00485	9847.82	-0.209681	0.454924	-0.460913	0.644861	0.896425
CNAG_06821	8279.6	-0.209573	0.148626	-1.41007	0.15852	0.584429
CNAG_12549	726.966	-0.209288	0.150352	-1.39199	0.163925	0.590761
CNAG_00923	2023.59	-0.209264	0.130272	-1.60637	0.108193	0.531578
CNAG_02987	14.5871	-0.209209	0.480792	-0.435134	0.663465	0.902472
CNAG_00911	51.702	-0.209175	0.357833	-0.584562	0.558843	0.862545
CNAG_00833	374.564	-0.209082	0.215934	-0.96827	0.33291	0.742113
CNAG_01538	2272.43	-0.208983	0.142136	-1.4703	0.14148	0.566133
CNAG_04978	357.988	-0.208925	0.252086	-0.828784	0.407227	0.794137
CNAG_04333	1423.6	-0.208794	0.168663	-1.23794	0.21574	0.645626
CNAG_02356	1320.67	-0.20865	0.0858022	-2.43176	0.0150256	0.240139
CNAG_01937	461.941	-0.208377	0.161763	-1.28816	0.197689	0.628357
CNAG_12105	630.027	-0.208321	0.247315	-0.842329	0.399604	0.787847
CNAG_04675	3585.72	-0.208156	0.231274	-0.900039	0.368099	0.768393
CNAG_12197	824.47	-0.20783	0.194999	-1.0658	0.286516	0.706984
CNAG_02510	8988.23	-0.207776	0.149102	-1.39352	0.163463	0.590325
CNAG_01537	12871.9	-0.207774	0.107312	-1.93616	0.0528476	0.418115
CNAG_00691	3406.98	-0.207713	0.251536	-0.825779	0.408929	0.795459
CNAG_05220	1604.06	-0.207652	0.128819	-1.61196	0.10697	0.529575
CNAG_00699	22506.4	-0.207651	0.161045	-1.2894	0.197261	0.628256
CNAG_12297	126.117	-0.20763	0.208981	-0.993535	0.320449	0.734471
CNAG_12755	198.059	-0.207531	0.251767	-0.824298	0.40977	0.795476
CNAG_13015	874.299	-0.207494	0.151383	-1.37066	0.170483	0.598724
CNAG_02810	26820.1	-0.207493	0.161456	-1.28514	0.198743	0.628734
CNAG_12041	211.422	-0.207203	0.247141	-0.838398	0.401807	0.790432
CNAG_03382	6446.26	-0.207035	0.183115	-1.13063	0.258211	0.676265
CNAG_00849	372.111	-0.207017	0.229014	-0.903952	0.366021	0.766362
CNAG_05572	1035.21	-0.206859	0.42894	-0.482257	0.629624	0.890662
CNAG_02381	249.072	-0.206826	0.180343	-1.14684	0.251446	0.670806
CNAG_05921	2971.37	-0.206736	0.326985	-0.632249	0.527224	0.850698
CNAG_02262	12189	-0.206664	0.136448	-1.5146	0.129874	0.557947
CNAG_05253	1422.22	-0.206641	0.289878	-0.712854	0.475936	0.824121
CNAG_07373	71250.4	-0.206478	0.204532	-1.00951	0.312728	0.73062
CNAG_12119	210.181	-0.206076	0.211031	-0.976521	0.328807	0.739902
CNAG_12600	2271.83	-0.206009	0.251708	-0.818443	0.413104	0.797096
CNAG_03156	2462.64	-0.205983	0.15679	-1.31375	0.18893	0.621597
CNAG_05130	2566.3	-0.205803	0.156423	-1.31568	0.188282	0.621496
CNAG_12681	40.4557	-0.205568	0.404735	-0.507906	0.611519	0.882733
CNAG_02734	38.5483	-0.205563	0.329395	-0.624062	0.532587	0.852717
CNAG_05565	1654.33	-0.205522	0.354314	-0.580055	0.561877	0.863612
CNAG_01732	5051.81	-0.205389	0.147996	-1.3878	0.165199	0.591584
CNAG_04059	381.272	-0.205263	0.280941	-0.730624	0.465009	0.818827
CNAG_00710	1522.3	-0.205136	0.158493	-1.29429	0.195566	0.626232
CNAG_00147	33443.5	-0.205133	0.128089	-1.60149	0.109268	0.531675
CNAG_06219	3612.69	-0.2049	0.0979888	-2.09105	0.0365234	0.359598
CNAG_00098	2246.19	-0.204805	0.233796	-0.875998	0.381031	0.776195
CNAG_06962	971.116	-0.204718	0.200227	-1.02243	0.306579	0.725941
CNAG_04970	845.011	-0.204703	0.439942	-0.465296	0.641719	0.895196
CNAG_06670	1782.08	-0.204643	0.239389	-0.854855	0.392632	0.783593
CNAG_01164	37651.5	-0.204612	0.0661124	-3.0949	0.00196877	0.0921586
CNAG_06747	20187.7	-0.204549	0.0919443	-2.2247	0.0261011	0.305242
CNAG_06902	10622.9	-0.204536	0.240053	-0.852046	0.394189	0.784372
CNAG_03427	1427.71	-0.204505	0.138241	-1.47933	0.139051	0.565185
CNAG_06674	3824.08	-0.204312	0.202959	-1.00666	0.314096	0.73152
CNAG_03998	4440.44	-0.20411	0.182275	-1.11979	0.262802	0.682461
CNAG_07933	65.7597	-0.204001	0.272836	-0.747706	0.454638	0.815872
CNAG_03818	6123.43	-0.203983	0.133589	-1.52694	0.126775	0.553531
CNAG_02066	613.719	-0.203983	0.12151	-1.67873	0.093204	0.503685
CNAG_05882	3387.01	-0.203952	0.155497	-1.31161	0.18965	0.622253
CNAG_12422	71.4541	-0.203931	0.251544	-0.810713	0.41753	0.798484
CNAG_03077	0.988435	-0.203833	0.434015	-0.469646	0.638608	NA
CNAG_00514	3694.83	-0.203782	0.133134	-1.53066	0.125854	0.551601
CNAG_12578	29.4458	-0.203665	0.373319	-0.545553	0.585374	0.872101
CNAG_03983	12085.3	-0.203298	0.135455	-1.50084	0.133396	0.562282
CNAG_12928	16.5354	-0.203271	0.452702	-0.449018	0.653419	0.900158
CNAG_05124	3954.5	-0.203168	0.0815281	-2.492	0.0127026	0.228161
CNAG_02765	239.901	-0.203004	0.17152	-1.18356	0.236588	0.659189
CNAG_00915	1773.05	-0.203004	0.129511	-1.56747	0.117006	0.54016
CNAG_03864	4088.05	-0.202847	0.208084	-0.974833	0.329643	0.739902
CNAG_03599	1325.32	-0.202812	0.0983202	-2.06277	0.0391342	0.369782
CNAG_00859	1866.87	-0.202752	0.0847849	-2.39137	0.0167855	0.252099
CNAG_05457	12535.8	-0.202618	0.132398	-1.53036	0.125927	0.551601
CNAG_01865	3928.56	-0.202531	0.168447	-1.20234	0.229232	0.654245
CNAG_03475	9513.94	-0.202499	0.071585	-2.82879	0.0046724	0.143317
CNAG_07808	5100.18	-0.202462	0.11282	-1.79456	0.0727233	0.465885
CNAG_07403	1481.42	-0.202408	0.121307	-1.66856	0.095204	0.508201
CNAG_01339	7023.28	-0.202266	0.044557	-4.53948	5.63933e-06	0.00224868
CNAG_00057	17337.3	-0.202209	0.252221	-0.801712	0.422719	0.800377
CNAG_00044	3441.92	-0.202063	0.161072	-1.25449	0.209665	0.639419
CNAG_03865	5271.78	-0.201775	0.390852	-0.516243	0.605685	0.881742
CNAG_06239	733.371	-0.201676	0.152813	-1.31976	0.186915	0.620672
CNAG_07597	845.469	-0.201656	0.162275	-1.24268	0.213986	0.643248
CNAG_04335	4986.38	-0.201634	0.14019	-1.43829	0.150352	0.575607
CNAG_03299	18154.7	-0.201591	0.073561	-2.74045	0.00613546	0.161486
CNAG_02180	7322.72	-0.20148	0.101849	-1.97821	0.0479049	0.402336
CNAG_12702	304.777	-0.201345	0.201421	-0.999622	0.317494	0.733846
CNAG_01845	15034.2	-0.201311	0.103105	-1.95249	0.0508804	0.412369
CNAG_06279	8051.21	-0.201124	0.102451	-1.96312	0.0496317	0.406161
CNAG_02897	3369.12	-0.201024	0.114553	-1.75486	0.0792837	0.47668
CNAG_12127	250.451	-0.200806	0.32286	-0.621961	0.533968	0.853214
CNAG_01387	2142.73	-0.20061	0.266926	-0.751558	0.452317	0.815168
CNAG_04119	6261.12	-0.200397	0.218375	-0.917671	0.358791	0.759182
CNAG_02110	6980.29	-0.2003	0.0720973	-2.77818	0.00546639	0.153331
CNAG_01482	5244.8	-0.200073	0.0873406	-2.29072	0.0219798	0.280047
CNAG_06671	3832.28	-0.200035	0.195326	-1.02411	0.305783	0.725132
CNAG_06299	3569.26	-0.199978	0.110313	-1.81283	0.0698581	0.458533
CNAG_06993	6294.4	-0.199652	0.141927	-1.40672	0.159509	0.584867
CNAG_13200	1351.77	-0.199458	0.440301	-0.453003	0.650547	0.898433
CNAG_04359	2661.4	-0.19945	0.182529	-1.09271	0.274522	0.693909
CNAG_01890	82856.2	-0.198987	0.149344	-1.33241	0.182727	0.616053
CNAG_03276	1128.16	-0.198959	0.16155	-1.23156	0.218112	0.647123
CNAG_01867	4641.24	-0.198747	0.132568	-1.49921	0.13382	0.562282
CNAG_06453	36530.8	-0.198682	0.213888	-0.928905	0.352938	0.756839
CNAG_06073	791.689	-0.198609	0.163986	-1.21113	0.225845	0.653288
CNAG_01061	1374.97	-0.198453	0.175555	-1.13043	0.258295	0.676265
CNAG_06804	6284.57	-0.198366	0.0899847	-2.20445	0.0274931	0.313673
CNAG_06109	23739.3	-0.198334	0.477363	-0.415478	0.677792	0.908012
CNAG_07574	525.103	-0.198302	0.272758	-0.727026	0.46721	0.821027
CNAG_12311	420.624	-0.198256	0.186086	-1.0654	0.286694	0.706984
CNAG_03040	15359.4	-0.198123	0.219575	-0.9023	0.366897	0.767175
CNAG_06440	1264.73	-0.198078	0.132234	-1.49794	0.13415	0.56238
CNAG_06903	2295.92	-0.198007	0.13426	-1.47479	0.140268	0.565993
CNAG_07544	183.663	-0.197825	0.185744	-1.06505	0.286856	0.707163
CNAG_01907	4657	-0.197675	0.249503	-0.792276	0.4282	0.801504
CNAG_01711	6242.84	-0.197656	0.162917	-1.21323	0.225042	0.652497
CNAG_04099	5546.24	-0.197604	0.130828	-1.51041	0.13094	0.5588
CNAG_07901	7117.14	-0.197529	0.108273	-1.82436	0.0680983	0.454776
CNAG_10115	0.827297	-0.19741	0.407489	-0.484454	0.628064	NA
CNAG_03138	4788.4	-0.197279	0.185154	-1.06548	0.286657	0.706984
CNAG_13165	172.553	-0.197141	0.191347	-1.03028	0.302879	0.723841
CNAG_01645	641.225	-0.196998	0.128083	-1.53804	0.124038	0.548506
CNAG_01692	4769.54	-0.19688	0.161708	-1.2175	0.223413	0.6505
CNAG_06354	1366.66	-0.196863	0.194354	-1.01291	0.311103	0.728647
CNAG_05095	3796.05	-0.196861	0.298984	-0.658434	0.510259	0.843382
CNAG_00649	14476.4	-0.196672	0.0588708	-3.34074	0.000835555	0.0550614
CNAG_06151	5712.14	-0.196671	0.159216	-1.23525	0.216739	0.645626
CNAG_01977	207.195	-0.196659	0.196239	-1.00214	0.316275	0.732161
CNAG_00091	43444.6	-0.196648	0.484076	-0.406235	0.68457	0.911554
CNAG_06149	1922.32	-0.196569	0.109606	-1.79342	0.0729059	0.465885
CNAG_12403	446.968	-0.196562	0.191085	-1.02866	0.303638	0.724674
CNAG_00637	2521.7	-0.196557	0.298078	-0.659415	0.509629	0.843382
CNAG_12882	374.663	-0.196422	0.251814	-0.780029	0.435374	0.806523
CNAG_01960	1745.19	-0.196209	0.178513	-1.09913	0.271712	0.690936
CNAG_03847	4783.23	-0.196165	0.229127	-0.85614	0.39192	0.783121
CNAG_12736	38.1847	-0.196162	0.346911	-0.565452	0.571766	0.866142
CNAG_13111	3615.96	-0.195803	0.204545	-0.95726	0.338436	0.745332
CNAG_05579	8541.87	-0.195514	0.0789858	-2.4753	0.0133124	0.231804
CNAG_04403	3178.72	-0.195501	0.134459	-1.45398	0.145953	0.570018
CNAG_01340	10311.6	-0.195478	0.111878	-1.74724	0.0805955	0.478295
CNAG_03971	54.08	-0.195474	0.298974	-0.653817	0.51323	0.845182
CNAG_02975	3089.87	-0.195413	0.134822	-1.44941	0.147224	0.570955
CNAG_01043	10440.8	-0.195329	0.415802	-0.469766	0.638523	0.894501
CNAG_13008	1084.33	-0.195264	0.152432	-1.28099	0.200196	0.630748
CNAG_05135	6800.36	-0.19521	0.0975303	-2.00153	0.0453356	0.391289
CNAG_02699	7530.2	-0.194924	0.118509	-1.64479	0.100012	0.514911
CNAG_07926	7371.24	-0.19482	0.0672279	-2.8979	0.00375665	0.128181
CNAG_03572	17312.4	-0.194815	0.311645	-0.625119	0.531893	0.85229
CNAG_12014	29.3179	-0.19471	0.425969	-0.457099	0.6476	0.897725
CNAG_06082	4.29271	-0.19439	0.44324	-0.438566	0.660976	NA
CNAG_01896	61552.2	-0.194276	0.146032	-1.33037	0.183398	0.616338
CNAG_04151	7134.65	-0.194157	0.180082	-1.07815	0.280965	0.700065
CNAG_06983	3546.59	-0.193925	0.129332	-1.49944	0.133761	0.562282
CNAG_04498	2641.38	-0.193907	0.127266	-1.52363	0.127601	0.554707
CNAG_01338	1960.04	-0.193737	0.258819	-0.748542	0.454133	0.815517
CNAG_03748	11697.9	-0.193432	0.120287	-1.60809	0.107815	0.531578
CNAG_12865	1702.21	-0.193058	0.434384	-0.44444	0.656725	0.90138
CNAG_04510	3252.67	-0.192825	0.128608	-1.49932	0.13379	0.562282
CNAG_06036	6325.2	-0.19279	0.163875	-1.17645	0.239417	0.66366
CNAG_05071	1132.73	-0.192756	0.116473	-1.65495	0.0979346	0.51272
CNAG_07767	1103.31	-0.192727	0.103851	-1.85579	0.0634832	0.442217
CNAG_04808	11298.4	-0.192707	0.0985413	-1.9556	0.0505123	0.410637
CNAG_03588	15194.6	-0.19267	0.0940739	-2.04807	0.0405529	0.376124
CNAG_04718	1019.81	-0.192599	0.135019	-1.42645	0.153737	0.579902
CNAG_00940	7371.73	-0.192408	0.0800962	-2.40221	0.0162964	0.247551
CNAG_05818	13461.7	-0.192287	0.0833474	-2.30705	0.021052	0.272549
CNAG_01962	354.088	-0.192277	0.337946	-0.568957	0.569385	0.866142
CNAG_00815	50222	-0.192263	0.181368	-1.06007	0.289112	0.709872
CNAG_05061	571.53	-0.19217	0.169727	-1.13223	0.257539	0.6758
CNAG_05410	1672.07	-0.192151	0.327152	-0.587343	0.556973	0.861721
CNAG_04118	4390.24	-0.191949	0.120197	-1.59696	0.110276	0.532702
CNAG_05292	14672.9	-0.191764	0.180276	-1.06372	0.287455	0.707782
CNAG_00686	30774.3	-0.191753	0.197291	-0.971928	0.331086	0.740649
CNAG_03319	9043.06	-0.191689	0.102588	-1.86853	0.0616878	0.441733
CNAG_00174	4426.43	-0.191665	0.146864	-1.30505	0.191876	0.624714
CNAG_04772	6643.15	-0.19164	0.118288	-1.62012	0.105207	0.525519
CNAG_02237	10881.6	-0.19163	0.081989	-2.33727	0.0194253	0.267284
CNAG_03125	1060.71	-0.19157	0.21178	-0.904574	0.365691	0.766362
CNAG_02745	7374.32	-0.191506	0.119999	-1.5959	0.11051	0.532702
CNAG_03685	1016.5	-0.191457	0.271939	-0.704045	0.481405	0.828665
CNAG_02374	3193.24	-0.191146	0.166556	-1.14764	0.251116	0.670806
CNAG_06087	4760.76	-0.191062	0.25202	-0.758122	0.448378	0.815168
CNAG_04904	29227.6	-0.190911	0.0610455	-3.12736	0.00176384	0.0868309
CNAG_12922	104.997	-0.190854	0.419553	-0.454899	0.649182	0.897889
CNAG_04506	281.964	-0.190748	0.211019	-0.903938	0.366028	0.766362
CNAG_12792	26.6044	-0.190734	0.398049	-0.479173	0.631816	0.891862
CNAG_07333	8084	-0.190415	0.131481	-1.44823	0.147553	0.570955
CNAG_02179	4708.25	-0.190394	0.205015	-0.928683	0.353054	0.756882
CNAG_01223	2745.27	-0.190252	0.12348	-1.54075	0.123378	0.548155
CNAG_07771	4385.87	-0.190232	0.176648	-1.0769	0.281524	0.700953
CNAG_00069	191.538	-0.190224	0.381084	-0.499166	NA	NA
CNAG_06548	7495.49	-0.190218	0.110244	-1.72543	0.0844498	0.485395
CNAG_01334	9222.79	-0.190045	0.225257	-0.843679	0.398849	0.786747
CNAG_04806	7883.95	-0.190018	0.155448	-1.22239	0.22156	0.649478
CNAG_06769	3423.17	-0.189915	0.114813	-1.65412	0.098103	0.513031
CNAG_05862	1560.31	-0.189838	0.246364	-0.770559	0.440968	0.810135
CNAG_00301	9682.42	-0.18967	0.30264	-0.626719	0.530844	0.852149
CNAG_05746	853.246	-0.189646	0.182207	-1.04083	0.297956	0.718657
CNAG_02303	5651.42	-0.189369	0.117309	-1.61428	0.106467	0.528032
CNAG_04327	27034.1	-0.189343	0.0777755	-2.43448	0.0149133	0.238823
CNAG_12189	4.45625	-0.189341	0.483113	-0.391919	0.695118	NA
CNAG_03722	12988.7	-0.189203	0.0785568	-2.40849	0.0160189	0.245674
CNAG_00978	3405.66	-0.189023	0.131268	-1.43997	0.149875	0.575471
CNAG_02968	552.861	-0.188555	0.36488	-0.516758	0.605325	0.881742
CNAG_00368	3114.63	-0.188456	0.129505	-1.4552	0.145614	0.569808
CNAG_06900	23988.1	-0.188004	0.10845	-1.73354	0.0829989	0.483839
CNAG_00272	5260.19	-0.187941	0.108627	-1.73015	0.0836032	0.484195
CNAG_03922	298.094	-0.187871	0.152522	-1.23176	0.218037	0.647123
CNAG_04789	3397.42	-0.187476	0.240529	-0.779433	0.435725	0.806617
CNAG_00440	642.237	-0.18743	0.139016	-1.34826	0.177575	0.608332
CNAG_12886	499.637	-0.187412	0.157104	-1.19292	0.232903	0.657682
CNAG_00572	5332.89	-0.18736	0.0748727	-2.50238	0.0123363	0.223595
CNAG_05791	8185.5	-0.186994	0.139084	-1.34446	0.178798	0.610288
CNAG_00181	1965.08	-0.186938	0.249205	-0.750139	0.453171	0.815168
CNAG_12231	663.685	-0.186823	0.18744	-0.996709	0.318906	0.733989
CNAG_06554	2029.95	-0.186549	0.280831	-0.664274	0.506515	0.841642
CNAG_00508	2629.97	-0.186447	0.147837	-1.26116	0.207252	0.637086
CNAG_12253	75.5308	-0.186446	0.343573	-0.542669	0.587358	0.873526
CNAG_06784	4169.18	-0.186437	0.146136	-1.27578	0.202034	0.633282
CNAG_00648	2133.83	-0.18641	0.272147	-0.684961	0.493368	0.83249
CNAG_04855	3884.96	-0.186322	0.160643	-1.15985	0.24611	0.666829
CNAG_04308	1737.03	-0.186238	0.13749	-1.35455	0.175561	0.607944
CNAG_07956	3884.28	-0.186158	0.102526	-1.81572	0.0694141	0.457502
CNAG_06819	11062	-0.185931	0.116677	-1.59355	0.111036	0.533367
CNAG_04599	3468.71	-0.185664	0.0759925	-2.44319	0.0145581	0.236941
CNAG_05895	7255.37	-0.185614	0.118881	-1.56134	0.118443	0.541308
CNAG_07760	559.107	-0.185559	0.167341	-1.10887	0.267486	0.687464
CNAG_02892	799.563	-0.185277	0.346869	-0.534142	0.593243	0.876449
CNAG_06473	6824.42	-0.185259	0.108903	-1.70114	0.0889172	0.494157
CNAG_03950	12008	-0.185126	0.118115	-1.56733	0.117037	0.54016
CNAG_06209	667.422	-0.185094	0.163023	-1.13539	0.256214	0.675238
CNAG_02814	13855	-0.184529	0.159906	-1.15398	0.248508	0.668723
CNAG_02860	69563.5	-0.184179	0.110228	-1.67089	0.0947434	0.507781
CNAG_07533	274.06	-0.184172	0.464405	-0.396577	0.691679	0.912966
CNAG_05981	470.595	-0.183985	0.214883	-0.856213	0.39188	0.783121
CNAG_07934	10.9145	-0.183892	0.407742	-0.451001	0.651989	0.899275
CNAG_05539	4670.82	-0.183849	0.154703	-1.1884	0.234676	0.65805
CNAG_04650	2126.05	-0.183793	0.1174	-1.56553	0.117458	0.540386
CNAG_03914	2418.96	-0.18355	0.141494	-1.29723	0.194554	0.625631
CNAG_12677	714.433	-0.183461	0.209478	-0.875801	0.381138	0.776195
CNAG_00551	12638.2	-0.183381	0.0929064	-1.97383	0.0484011	0.402501
CNAG_06943	2685.07	-0.183138	0.0928705	-1.97198	0.0486124	0.402998
CNAG_05628	1913.88	-0.183138	0.115235	-1.58925	0.112004	0.534783
CNAG_04013	2389.23	-0.183068	0.0895211	-2.04497	0.0408577	0.376124
CNAG_04338	3629.38	-0.183025	0.12637	-1.44833	0.147526	0.570955
CNAG_02542	5754.47	-0.182973	0.458475	-0.399089	0.689827	0.912966
CNAG_04323	15346.6	-0.18292	0.116832	-1.56566	0.117428	0.540386
CNAG_07913	105.467	-0.18272	0.242327	-0.754024	0.450835	0.815168
CNAG_03805	6121.41	-0.182653	0.106221	-1.71956	0.0855126	0.486422
CNAG_01632	936.154	-0.182485	0.242811	-0.751554	0.45232	0.815168
CNAG_00017	2331.21	-0.18248	0.137065	-1.33134	0.183078	0.616053
CNAG_01344	3449.68	-0.182474	0.127633	-1.42968	0.15281	0.578589
CNAG_06263	209.14	-0.182466	0.20929	-0.871831	0.3833	0.777421
CNAG_02092	3179.83	-0.182439	0.12221	-1.49284	0.135479	0.56273
CNAG_00971	925.806	-0.182082	0.182291	-0.998856	0.317864	0.733846
CNAG_04598	1804.44	-0.181842	0.109679	-1.65794	0.09733	0.510998
CNAG_04262	1116.97	-0.181712	0.173515	-1.04724	0.294988	0.71635
CNAG_07004	39393.7	-0.18144	0.0559259	-3.24429	0.00117745	0.0718849
CNAG_01911	2019.07	-0.181294	0.125998	-1.43887	0.150188	0.575499
CNAG_12293	1380.22	-0.18129	0.116317	-1.55858	0.119097	0.541517
CNAG_03164	24.8601	-0.181219	0.341114	-0.531257	0.595241	0.877457
CNAG_02375	3007.3	-0.181155	0.103038	-1.75814	0.0787235	0.47668
CNAG_00828	927.22	-0.181054	0.155627	-1.16338	0.244675	0.666649
CNAG_01518	1277.46	-0.180839	0.156071	-1.1587	0.24658	0.666829
CNAG_03026	1646.56	-0.180697	0.201719	-0.895785	0.370368	0.769448
CNAG_07563	1637.79	-0.180566	0.0946641	-1.90744	0.0564638	0.429547
CNAG_02464	5233.03	-0.18036	0.104398	-1.72762	0.0840556	0.485395
CNAG_05737	3346.73	-0.179926	0.123855	-1.45272	0.146301	0.570619
CNAG_04444	9628.19	-0.179907	0.0916735	-1.96248	0.049707	0.406161
CNAG_06065	2749.42	-0.179668	0.20394	-0.880983	0.378327	0.77541
CNAG_06236	2719.43	-0.179491	0.0846945	-2.11928	0.0340669	0.349266
CNAG_05395	3295.91	-0.179378	0.107614	-1.66687	0.0955402	0.50833
CNAG_00323	46.9774	-0.179305	0.338302	-0.530014	0.596102	0.877748
CNAG_12060	2442.3	-0.179232	0.105883	-1.69274	0.090505	0.497231
CNAG_07639	3283.66	-0.179198	0.149021	-1.2025	0.229169	0.654245
CNAG_04684	10097.2	-0.17916	0.0797275	-2.24715	0.0246302	0.29645
CNAG_01938	8117.96	-0.179067	0.104303	-1.7168	0.0860161	0.487547
CNAG_06400	202142	-0.17889	0.120551	-1.48394	0.137825	0.565185
CNAG_05767	6499.85	-0.17887	0.139066	-1.28623	0.198364	0.628734
CNAG_01126	12746.2	-0.178868	0.11842	-1.51046	0.130927	0.5588
CNAG_06737	3522.52	-0.178715	0.233953	-0.76389	0.444933	0.812907
CNAG_05763	846.781	-0.178705	0.136594	-1.30829	0.190776	0.624052
CNAG_06075	23320.3	-0.178654	0.434801	-0.410888	0.681155	0.910501
CNAG_12864	41.2236	-0.178375	0.38634	-0.461704	0.644293	0.895944
CNAG_04196	6459.92	-0.178334	0.130813	-1.36327	0.172798	0.602564
CNAG_13028	247.525	-0.17833	0.272913	-0.653432	0.513478	0.845242
CNAG_12649	544.343	-0.178287	0.16907	-1.05452	0.291646	0.71295
CNAG_00456	64455.9	-0.178287	0.202195	-0.881755	0.377909	0.77541
CNAG_06527	106.957	-0.17827	0.240651	-0.740781	0.458826	0.817684
CNAG_04787	652.405	-0.178257	0.325629	-0.547423	0.584088	0.871488
CNAG_00988	15892.2	-0.178241	0.136698	-1.3039	0.192267	0.624714
CNAG_07880	1057.02	-0.178216	0.249106	-0.715423	0.474348	0.824106
CNAG_00740	5873.84	-0.178131	0.19272	-0.924299	0.355331	0.757188
CNAG_03681	5614.4	-0.17807	0.0898345	-1.9822	0.0474572	0.400923
CNAG_07404	712.706	-0.177973	0.185058	-0.961711	0.336195	0.744162
CNAG_02039	295.789	-0.177738	0.366725	-0.484663	0.627915	0.889812
CNAG_04517	35.5794	-0.177598	0.38123	-0.465856	0.641318	0.895196
CNAG_05590	38873.2	-0.177586	0.162878	-1.0903	0.275581	0.694832
CNAG_02592	579.29	-0.177502	0.147034	-1.20722	0.227349	0.653488
CNAG_02172	5830.43	-0.17747	0.129663	-1.36871	0.171091	0.598933
CNAG_03191	3493.75	-0.17747	0.112253	-1.58097	0.113884	0.536458
CNAG_04318	3863.3	-0.17738	0.0789657	-2.24629	0.0246855	0.29645
CNAG_03663	1597.04	-0.177376	0.104	-1.70553	0.0880948	0.491888
CNAG_03889	568.146	-0.177264	0.124435	-1.42455	0.154288	0.580072
CNAG_04051	5882.28	-0.177166	0.129416	-1.36897	0.17101	0.598933
CNAG_00433	3791.26	-0.17713	0.184139	-0.961939	0.33608	0.744162
CNAG_07514	8573.28	-0.177061	0.128547	-1.3774	0.168388	0.596578
CNAG_01521	1080.52	-0.176909	0.274876	-0.643594	0.519839	0.847189
CNAG_12871	1414.2	-0.176845	0.13358	-1.32389	0.18554	0.619528
CNAG_03562	1283.22	-0.176814	0.116641	-1.51588	0.12955	0.557947
CNAG_06243	441.472	-0.176786	0.163058	-1.0842	0.278277	0.698427
CNAG_03187	481.137	-0.176756	0.442643	-0.399319	0.689658	0.912966
CNAG_07819	129.33	-0.176548	0.271265	-0.650831	0.515156	0.845783
CNAG_05642	4832.08	-0.176536	0.138374	-1.27579	0.20203	0.633282
CNAG_07520	1369.36	-0.176365	0.136078	-1.29606	0.194955	0.625777
CNAG_06313	32367.8	-0.17614	0.109981	-1.60154	0.109256	0.531675
CNAG_04223	19.9595	-0.175962	0.468892	-0.375271	0.707459	0.916949
CNAG_02103	4489.75	-0.175913	0.159974	-1.09964	0.271491	0.690855
CNAG_12906	1752.27	-0.175844	0.132553	-1.32659	0.184643	0.61827
CNAG_01837	7314.93	-0.175765	0.0863392	-2.03575	0.0417752	0.377566
CNAG_07604	2691.88	-0.175748	0.115856	-1.51695	0.129278	0.557947
CNAG_03467	1182.14	-0.175707	0.082187	-2.1379	0.0325251	0.34359
CNAG_06494	4939.49	-0.175556	0.323563	-0.542571	0.587425	0.873526
CNAG_00601	8093.46	-0.175555	0.141208	-1.24324	0.21378	0.643248
CNAG_00424	2761.53	-0.175537	0.156106	-1.12448	0.260811	0.680396
CNAG_03202	7201.74	-0.175344	0.159025	-1.10262	0.270192	0.689613
CNAG_04148	4014.63	-0.175329	0.205366	-0.85374	0.393249	0.783714
CNAG_05613	8276.99	-0.175204	0.111729	-1.56811	0.116855	0.54016
CNAG_05383	3612.04	-0.175113	0.338164	-0.517833	0.604575	0.881696
CNAG_10059	1.81839	-0.175044	0.424298	-0.41255	0.679936	NA
CNAG_05255	4244.81	-0.175035	0.0930458	-1.88117	0.0599492	0.439695
CNAG_03039	1781.31	-0.174939	0.254872	-0.686382	0.492472	0.83249
CNAG_13098	3.99111	-0.17475	0.483761	-0.361232	0.717926	NA
CNAG_03399	12643.5	-0.174642	0.115664	-1.50991	0.131067	0.5588
CNAG_12353	33.3942	-0.174501	0.352562	-0.494951	0.620634	0.887018
CNAG_07188	3303.01	-0.174335	0.0940487	-1.85366	0.0637875	0.442217
CNAG_05697	7222.99	-0.17428	0.128696	-1.35421	0.17567	0.60806
CNAG_05667	2088.05	-0.174244	0.121893	-1.42949	0.152863	0.578589
CNAG_01294	2718.9	-0.174135	0.0646692	-2.6927	0.0070875	0.170153
CNAG_05486	7338.18	-0.173926	0.111254	-1.56333	0.117975	0.541031
CNAG_06155	2583.59	-0.173692	0.114206	-1.52087	0.128292	0.556049
CNAG_00582	4827.95	-0.173689	0.0860788	-2.01779	0.0436131	0.385603
CNAG_05097	2472.49	-0.173466	0.337206	-0.514421	0.606958	0.881856
CNAG_05804	6804.2	-0.173413	0.104895	-1.6532	0.0982908	0.513339
CNAG_12560	31.0569	-0.17322	0.344444	-0.502898	0.615036	0.884246
CNAG_00238	29124.3	-0.173142	0.112036	-1.5454	0.122248	0.546792
CNAG_03893	2738.92	-0.172944	0.15585	-1.10968	0.267135	0.687227
CNAG_01649	6694.93	-0.172931	0.0872242	-1.9826	0.0474117	0.400923
CNAG_03686	795.686	-0.172917	0.172307	-1.00354	0.315601	0.732161
CNAG_00158	1168.06	-0.17286	0.185311	-0.932812	0.350917	0.7561
CNAG_03838	443.975	-0.172681	0.317149	-0.544478	0.586113	0.873038
CNAG_07478	990.453	-0.172495	0.15611	-1.10496	0.269179	0.68937
CNAG_05540	17895.9	-0.172465	0.0902189	-1.91163	0.0559239	0.427844
CNAG_12006	313.475	-0.172428	0.431388	-0.399705	0.689374	0.912966
CNAG_00765	4875.49	-0.172086	0.128331	-1.34096	0.179935	0.612164
CNAG_01377	7583.68	-0.172079	0.115515	-1.48968	0.136309	0.564123
CNAG_00123	1258.5	-0.171985	0.433453	-0.39678	0.69153	0.912966
CNAG_03680	2712.45	-0.171936	0.129136	-1.33144	0.183045	0.616053
CNAG_03153	9589.7	-0.171857	0.056439	-3.045	0.00232683	0.0997658
CNAG_01683	34342.7	-0.171823	0.172204	-0.997786	0.318383	0.733846
CNAG_00634	6922.42	-0.171751	0.166677	-1.03044	0.302804	0.723841
CNAG_04895	4753.15	-0.171729	0.11739	-1.46289	0.143498	0.568064
CNAG_01342	2955.62	-0.171613	0.0884526	-1.94017	0.0523595	0.417706
CNAG_10069	0.623787	-0.171523	0.354556	-0.483767	0.628551	NA
CNAG_00547	18265.4	-0.171235	0.20582	-0.831963	0.40543	0.792802
CNAG_00375	3877.44	-0.171054	0.111185	-1.53845	0.123937	0.548506
CNAG_07955	985.138	-0.170865	0.110392	-1.5478	0.12167	0.546041
CNAG_06017	919.258	-0.170776	0.154075	-1.1084	0.267689	0.687765
CNAG_05005	4188.31	-0.170765	0.217044	-0.786777	0.431412	0.803872
CNAG_02498	5007.19	-0.170715	0.129385	-1.31944	0.187024	0.620672
CNAG_01918	2525.99	-0.170676	0.160025	-1.06656	0.286171	0.706787
CNAG_03408	7649.96	-0.170668	0.478736	-0.356497	0.721468	0.92298
CNAG_01540	1734.06	-0.170447	0.0944926	-1.80382	0.0712599	0.462236
CNAG_05592	10617.3	-0.170321	0.0825348	-2.06362	0.0390536	0.369782
CNAG_12540	301.49	-0.170274	0.395083	-0.430982	0.666481	0.90403
CNAG_01712	5679	-0.170178	0.112901	-1.50732	0.13173	0.5588
CNAG_02286	7053.79	-0.170156	0.148385	-1.14671	0.2515	0.670806
CNAG_05037	570.678	-0.170013	0.232162	-0.7323	0.463986	0.818827
CNAG_05665	2442.45	-0.169631	0.258393	-0.656485	0.511512	0.843769
CNAG_10014	0.732358	-0.16963	0.24236	-0.699906	0.483986	NA
CNAG_04277	3812.54	-0.169539	0.11065	-1.53222	0.125469	0.551304
CNAG_12139	215.707	-0.169408	0.20374	-0.831492	0.405696	0.792802
CNAG_04217	6298.51	-0.168931	0.254765	-0.663086	0.507276	0.841941
CNAG_05353	7540.29	-0.168738	0.121124	-1.3931	0.163589	0.590325
CNAG_05598	3936.62	-0.168665	0.133109	-1.26712	0.205113	0.634513
CNAG_02424	3031.89	-0.168475	0.143517	-1.1739	0.240433	0.664788
CNAG_07699	7243.04	-0.168447	0.220321	-0.764551	0.444539	0.812568
CNAG_01285	4089.49	-0.168335	0.201743	-0.834406	0.404052	0.792308
CNAG_03821	4707.02	-0.168237	0.0807569	-2.08326	0.0372279	0.363839
CNAG_04341	5425.77	-0.168148	0.127591	-1.31787	0.187547	0.621214
CNAG_01973	9030.9	-0.168101	0.0547502	-3.07032	0.00213831	0.094739
CNAG_12210	334.198	-0.167836	0.34782	-0.482535	0.629426	0.890662
CNAG_02032	5084.42	-0.167547	0.118042	-1.41939	0.155786	0.581645
CNAG_07313	578.301	-0.167491	0.127463	-1.31404	0.188833	0.621597
CNAG_01209	4951.05	-0.167347	0.192309	-0.870199	0.384192	0.778042
CNAG_03199	316.367	-0.167291	0.233308	-0.717039	0.47335	0.823509
CNAG_02192	423.471	-0.167289	0.169566	-0.986567	0.323855	0.736934
CNAG_05527	8217.23	-0.167223	0.21505	-0.777598	0.436806	0.807252
CNAG_04954	8238.69	-0.167075	0.110824	-1.50758	0.131663	0.5588
CNAG_03059	1353.29	-0.167064	0.271383	-0.6156	0.538158	0.855437
CNAG_04114	50182.1	-0.167059	0.0816664	-2.04562	0.0407935	0.376124
CNAG_02151	3389.85	-0.166951	0.110712	-1.50798	0.13156	0.5588
CNAG_05607	4814.04	-0.166835	0.28952	-0.576248	0.564448	0.86467
CNAG_05152	8254.67	-0.16673	0.0636038	-2.62139	0.00875718	0.188244
CNAG_06248	17899.6	-0.166614	0.129174	-1.28984	0.197105	0.62801
CNAG_04676	20073.9	-0.166539	0.0805732	-2.06692	0.0387414	0.36869
CNAG_06540	603.756	-0.166523	0.119404	-1.39462	0.163131	0.59025
CNAG_04724	5698.15	-0.166509	0.0983354	-1.69328	0.0904027	0.497231
CNAG_03648	9865.19	-0.166502	0.10352	-1.60841	0.107746	0.531578
CNAG_04098	19949.3	-0.16647	0.208892	-0.796921	0.425497	0.801222
CNAG_01022	2313.99	-0.166371	0.143482	-1.15953	0.246242	0.666829
CNAG_04283	25671.8	-0.166359	0.0933616	-1.78188	0.0747682	0.469517
CNAG_06404	1553.6	-0.166281	0.464462	-0.358007	0.720338	0.922102
CNAG_12807	384.618	-0.166166	0.179862	-0.923857	0.355561	0.757188
CNAG_01758	662.275	-0.166014	0.151921	-1.09277	0.274497	0.693909
CNAG_03365	2960.49	-0.165913	0.210972	-0.78642	0.431621	0.803872
CNAG_00515	903.073	-0.165856	0.130722	-1.26877	0.204522	0.634004
CNAG_12608	194.119	-0.165753	0.244295	-0.678496	0.497457	0.834819
CNAG_10013	0.558363	-0.16569	0.229784	-0.721067	0.470868	NA
CNAG_02996	2701.27	-0.165569	0.234877	-0.704915	0.480863	0.828447
CNAG_04354	4294.15	-0.165557	0.188008	-0.880587	0.378542	0.77541
CNAG_05033	4193.63	-0.165327	0.103345	-1.59976	0.109652	0.532565
CNAG_02048	3899.89	-0.165203	0.132539	-1.24645	0.2126	0.642295
CNAG_12135	572.367	-0.164971	0.187	-0.882199	0.377669	0.77541
CNAG_04515	8227.43	-0.164878	0.165783	-0.994541	0.31996	0.734471
CNAG_00439	6265.25	-0.164837	0.0834493	-1.97529	0.0482353	0.402336
CNAG_02175	5687.87	-0.164828	0.0946748	-1.741	0.0816843	0.480019
CNAG_06336	11008.7	-0.164772	0.158157	-1.04183	0.297492	0.718481
CNAG_07825	2211.26	-0.164451	0.137337	-1.19743	0.231139	0.656458
CNAG_12215	649.817	-0.164407	0.317389	-0.518	0.604459	0.881696
CNAG_01027	5717.51	-0.164391	0.121993	-1.34754	0.177805	0.608391
CNAG_12879	190.869	-0.164324	0.276229	-0.594883	0.551922	0.859851
CNAG_03381	1120.26	-0.164243	0.203947	-0.805319	0.420635	0.799105
CNAG_12434	286.881	-0.164228	0.135928	-1.2082	0.226971	0.653488
CNAG_00462	3875.11	-0.164192	0.111415	-1.4737	0.140563	0.565993
CNAG_04947	265.358	-0.164161	0.140388	-1.16934	0.242269	0.665367
CNAG_12576	4.09338	-0.164069	0.48129	-0.340894	0.733183	NA
CNAG_04164	2203.91	-0.163936	0.0972337	-1.686	0.0917965	0.500297
CNAG_05734	7977.88	-0.163841	0.151493	-1.08151	0.27947	0.699553
CNAG_05369	2216.17	-0.163746	0.0716109	-2.28661	0.0222187	0.28164
CNAG_05753	17749.9	-0.163503	0.0441166	-3.70615	0.000210434	0.0279581
CNAG_01248	5659.98	-0.163368	0.161879	-1.0092	0.31288	0.73062
CNAG_03935	11533	-0.163297	0.163541	-0.99851	0.318032	0.733846
CNAG_12441	75.2823	-0.163107	0.24167	-0.674917	0.499729	0.836728
CNAG_03849	6452.33	-0.163081	0.160636	-1.01522	0.310003	0.728451
CNAG_04507	3220.91	-0.163079	0.107146	-1.52202	0.128005	0.555406
CNAG_07781	5247.29	-0.163077	0.105182	-1.55042	0.121041	0.545299
CNAG_12830	306.298	-0.163039	0.311135	-0.524014	0.600269	0.879931
CNAG_07994	1985.07	-0.16294	0.1207	-1.34996	0.177027	0.60828
CNAG_03339	1096.82	-0.16286	0.114819	-1.4184	0.156075	0.582451
CNAG_07790	520.864	-0.162822	0.316748	-0.514043	0.607222	0.881856
CNAG_00237	3961.86	-0.162742	0.133104	-1.22267	0.221456	0.649478
CNAG_03376	3987.36	-0.162633	0.108419	-1.50004	0.133603	0.562282
CNAG_07881	121.176	-0.16254	0.250141	-0.649793	0.515826	0.846077
CNAG_04174	1369.03	-0.162517	0.141116	-1.15166	0.24946	0.669802
CNAG_00683	4998.64	-0.16243	0.0992206	-1.63706	0.101618	0.518144
CNAG_12798	1910.5	-0.162396	0.170175	-0.954287	0.339938	0.745955
CNAG_06696	13448.1	-0.162244	0.0746422	-2.17363	0.0297332	0.32527
CNAG_02679	2813.38	-0.162102	0.141178	-1.14821	0.250881	0.670806
CNAG_01734	6539.76	-0.162089	0.127068	-1.27561	0.202094	0.633282
CNAG_07941	13299.1	-0.16207	0.127244	-1.27369	0.202774	0.63365
CNAG_06966	328.455	-0.161635	0.236577	-0.683224	0.494465	0.832616
CNAG_13118	528.499	-0.161521	0.271335	-0.595282	0.551655	0.859704
CNAG_01897	10506.3	-0.161237	0.115524	-1.3957	0.162805	0.589633
CNAG_02402	2649.79	-0.161146	0.129527	-1.24411	0.213459	0.643248
CNAG_00126	6445.55	-0.160874	0.108105	-1.48812	0.13672	0.564843
CNAG_03273	6697.29	-0.16083	0.161279	-0.997219	0.318658	0.733989
CNAG_06322	1330.54	-0.160787	0.134834	-1.19248	0.233072	0.657682
CNAG_06394	407.59	-0.16073	0.164477	-0.977215	0.328463	0.739654
CNAG_08028	3107.09	-0.160603	0.120572	-1.33201	0.182856	0.616053
CNAG_00383	9488.43	-0.160456	0.16199	-0.990529	0.321916	0.734978
CNAG_05380	3405.36	-0.160373	0.0863131	-1.85804	0.0631638	0.442217
CNAG_06085	6282.68	-0.160254	0.220789	-0.725826	0.467946	0.821273
CNAG_05448	12.0613	-0.160135	0.485633	-0.329744	0.741593	0.928447
CNAG_07744	4039.24	-0.160129	0.13379	-1.19686	0.23136	0.656529
CNAG_10078	0.509877	-0.160126	0.258708	-0.618946	0.535952	NA
CNAG_12615	328.587	-0.160066	0.170577	-0.93838	0.348049	0.753185
CNAG_07469	16526.9	-0.159979	0.122754	-1.30324	0.192492	0.624714
CNAG_04404	738.184	-0.159837	0.103972	-1.53732	0.124216	0.548506
CNAG_07981	384.803	-0.159762	0.198185	-0.806128	0.420169	0.799105
CNAG_04973	5120.75	-0.159246	0.100235	-1.58873	0.112121	0.534783
CNAG_08002	4803.15	-0.159167	0.0859144	-1.85262	0.0639363	0.442614
CNAG_04591	282.555	-0.159167	0.26473	-0.601242	0.547679	0.858777
CNAG_13038	490.504	-0.159157	0.145932	-1.09062	0.27544	0.694832
CNAG_06530	1997.22	-0.159094	0.0952614	-1.67008	0.0949039	0.507969
CNAG_01716	4179.35	-0.159079	0.0820471	-1.93888	0.0525164	0.417706
CNAG_06642	10380.2	-0.159063	0.101903	-1.56092	0.118543	0.541455
CNAG_05787	4726.39	-0.158998	0.107238	-1.48267	0.138162	0.565185
CNAG_06695	2678.85	-0.158897	0.132799	-1.19652	0.231493	0.656529
CNAG_02223	6155.75	-0.158847	0.164099	-0.967998	0.333046	0.742113
CNAG_07774	1298.71	-0.158808	0.142031	-1.11812	0.263516	0.682984
CNAG_02588	941.199	-0.158476	0.119079	-1.33085	0.18324	0.616105
CNAG_02501	1921.32	-0.158431	0.138441	-1.14439	0.252461	0.672637
CNAG_02047	1361.63	-0.158364	0.405866	-0.390188	0.696398	0.913839
CNAG_02355	1414.27	-0.158345	0.237356	-0.66712	0.504696	0.839931
CNAG_07315	3673.95	-0.15826	0.084314	-1.87703	0.0605137	0.439695
CNAG_01985	30831.8	-0.158116	0.0898131	-1.7605	0.0783223	0.476083
CNAG_01694	4724.59	-0.157996	0.192543	-0.820574	0.411889	0.797091
CNAG_02219	2397.03	-0.15796	0.303543	-0.520387	0.602794	0.881415
CNAG_12739	668.284	-0.157936	0.135989	-1.16139	0.245483	0.666829
CNAG_07717	10594.7	-0.157737	0.104974	-1.50264	0.132932	0.562108
CNAG_01235	14907	-0.15757	0.119517	-1.31839	0.187373	0.621199
CNAG_00291	2598.9	-0.157453	0.127543	-1.23451	0.217012	0.645626
CNAG_07363	11691.9	-0.157327	0.0664659	-2.36704	0.0179311	0.259311
CNAG_12332	154.493	-0.157196	0.310323	-0.506555	0.612467	0.88326
CNAG_05180	6267.8	-0.157038	0.140758	-1.11566	0.264569	0.684311
CNAG_01423	4462.94	-0.156951	0.0759023	-2.0678	0.0386585	0.36869
CNAG_00146	3471.79	-0.156924	0.0724656	-2.16549	0.0303498	0.329755
CNAG_12821	2041.87	-0.156888	0.123499	-1.27037	0.203954	0.63365
CNAG_04202	1910.12	-0.156842	0.277567	-0.565059	0.572034	0.866142
CNAG_00167	1363.19	-0.156765	0.259179	-0.604853	0.545277	0.858777
CNAG_04161	2232.69	-0.156644	0.08569	-1.82803	0.0675443	0.454147
CNAG_06100	2609.2	-0.156496	0.0740876	-2.11231	0.0346602	0.35257
CNAG_03348	2843.59	-0.15647	0.156951	-0.996936	0.318796	0.733989
CNAG_06387	7880.96	-0.156305	0.0814292	-1.91952	0.054918	0.425116
CNAG_12959	649.954	-0.156252	0.182401	-0.856638	0.391645	0.783121
CNAG_12748	651.691	-0.156207	0.177368	-0.880694	0.378484	0.77541
CNAG_00591	553.726	-0.156023	0.198568	-0.785742	0.432019	0.803998
CNAG_05233	6303.14	-0.155964	0.0613599	-2.54179	0.0110287	0.212449
CNAG_00051	11394.8	-0.155958	0.104416	-1.49362	0.135275	0.56238
CNAG_04720	5800.83	-0.155932	0.0906799	-1.71959	0.0855078	0.486422
CNAG_01591	4358.82	-0.155858	0.169832	-0.917717	0.358767	0.759182
CNAG_02903	3244.87	-0.155819	0.0740939	-2.10299	0.035467	0.355945
CNAG_01620	1719.7	-0.155796	0.204917	-0.760287	0.447083	0.814039
CNAG_02789	5483.17	-0.155766	0.162068	-0.961115	0.336494	0.744188
CNAG_06703	3592.12	-0.155728	0.0890655	-1.74847	0.0803826	0.47804
CNAG_03120	55850.9	-0.155696	0.177529	-0.877017	0.380477	0.775839
CNAG_06706	2878.87	-0.155635	0.156464	-0.994697	0.319884	0.734471
CNAG_12680	1150.22	-0.15551	0.0951346	-1.63464	0.102126	0.518144
CNAG_07454	64.028	-0.155481	0.309076	-0.50305	0.614929	0.884246
CNAG_05279	220.973	-0.155427	0.255858	-0.607472	0.543537	0.858529
CNAG_02856	12351	-0.155385	0.150523	-1.0323	0.301933	0.722231
CNAG_04727	1561.47	-0.155319	0.299324	-0.5189	0.60383	0.881464
CNAG_12244	433.922	-0.155225	0.225878	-0.687207	0.491952	0.83249
CNAG_07507	2544.13	-0.155205	0.0899892	-1.72471	0.0845795	0.485395
CNAG_00026	7020.85	-0.155122	0.114415	-1.35579	0.175166	0.606944
CNAG_07665	13258.2	-0.154972	0.111865	-1.38534	0.165947	0.591809
CNAG_12641	0.929141	-0.154942	0.38944	-0.397857	0.690735	NA
CNAG_03638	8241.49	-0.154857	0.096922	-1.59775	0.110099	0.532702
CNAG_13103	87.7668	-0.154808	0.235757	-0.656642	0.511411	0.843769
CNAG_04738	6936.21	-0.154706	0.181845	-0.850757	0.394905	0.784372
CNAG_13095	390.025	-0.154538	0.166762	-0.926699	0.354083	0.757001
CNAG_03760	4170.82	-0.154474	0.0786798	-1.96332	0.049609	0.406161
CNAG_03903	8601.51	-0.154472	0.115362	-1.33901	0.180566	0.613686
CNAG_07759	57.6252	-0.154369	0.394633	-0.39117	0.695672	0.913839
CNAG_02517	810.849	-0.154343	0.240047	-0.64297	0.520244	0.847189
CNAG_01615	1687.93	-0.154276	0.262724	-0.587218	0.557058	0.861721
CNAG_03189	4747.86	-0.154206	0.121089	-1.27349	0.202845	0.63365
CNAG_05311	12802.6	-0.154198	0.121002	-1.27434	0.202541	0.63365
CNAG_00521	4321.63	-0.154196	0.17569	-0.877659	0.380129	0.775751
CNAG_03154	4137.58	-0.154181	0.279209	-0.552207	0.580807	0.869963
CNAG_06616	1229.06	-0.154155	0.350908	-0.439302	0.660443	0.902472
CNAG_02550	2514.9	-0.154133	0.411701	-0.37438	0.708121	0.917034
CNAG_07892	1101.31	-0.153962	0.131203	-1.17346	0.240612	0.664788
CNAG_01230	23729.5	-0.153801	0.22799	-0.674598	0.499931	0.836891
CNAG_03227	2134.84	-0.153792	0.311314	-0.494009	0.6213	0.887174
CNAG_00745	4399.27	-0.15364	0.20464	-0.750783	0.452783	0.815168
CNAG_03718	5432.5	-0.153242	0.0945541	-1.62068	0.105086	0.52543
CNAG_02348	859.6	-0.153197	0.198543	-0.771604	0.440349	0.810135
CNAG_02318	2288.38	-0.153189	0.104303	-1.46869	0.141916	0.56674
CNAG_04502	5196.19	-0.15318	0.106556	-1.43756	0.15056	0.575607
CNAG_05113	4095.7	-0.153108	0.0776106	-1.97277	0.0485214	0.402662
CNAG_01266	9928.88	-0.153072	0.0799032	-1.91572	0.055401	0.426327
CNAG_06569	2325.65	-0.153017	0.108204	-1.41416	0.157315	0.584083
CNAG_04315	2520.99	-0.152907	0.266282	-0.574229	0.565813	0.865684
CNAG_05874	3169.89	-0.152882	0.464706	-0.328988	0.742165	0.928725
CNAG_01189	26847.5	-0.152842	0.212522	-0.719183	0.472028	0.823005
CNAG_00287	4421.81	-0.152677	0.124748	-1.22388	0.220997	0.64914
CNAG_02236	5246.99	-0.152568	0.070785	-2.15538	0.0311322	0.334609
CNAG_00682	13668.5	-0.152556	0.16403	-0.930053	0.352343	0.756173
CNAG_01529	1248.93	-0.152507	0.204303	-0.746474	0.455381	0.816408
CNAG_06169	10209.5	-0.152482	0.39977	-0.381424	0.702889	0.915186
CNAG_07607	2183.63	-0.152448	0.257711	-0.591548	0.554153	0.860646
CNAG_01330	5122.03	-0.152434	0.132264	-1.1525	0.249117	0.669503
CNAG_01948	4405.83	-0.15243	0.131415	-1.15991	0.246084	0.666829
CNAG_05643	729.995	-0.152354	0.324334	-0.469745	0.638537	0.894501
CNAG_04687	107105	-0.152074	0.206273	-0.737247	0.460972	0.81811
CNAG_03476	17741.9	-0.152064	0.109734	-1.38575	0.165823	0.591809
CNAG_01352	4204.33	-0.152061	0.162443	-0.936089	0.349228	0.754562
CNAG_07491	8750.81	-0.152055	0.26961	-0.563981	0.572767	0.866503
CNAG_10107	0.68793	-0.152008	0.26567	-0.57217	0.567207	NA
CNAG_07667	22365	-0.151989	0.105266	-1.44385	0.14878	0.573285
CNAG_00505	1948.33	-0.151975	0.0968595	-1.56903	0.116641	0.539881
CNAG_05479	8596.85	-0.151818	0.190169	-0.798331	0.424678	0.801184
CNAG_06820	3700.57	-0.151681	0.0940988	-1.61193	0.106978	0.529575
CNAG_00897	37709.7	-0.151492	0.083173	-1.82141	0.0685443	0.454776
CNAG_13056	50.2004	-0.151445	0.312628	-0.484425	0.628084	0.889812
CNAG_06125	553319	-0.151369	0.0589547	-2.56754	0.0102424	0.20614
CNAG_01961	13338.7	-0.151287	0.137676	-1.09886	0.27183	0.690936
CNAG_01112	8262.7	-0.151274	0.220524	-0.685979	0.492726	0.83249
CNAG_01933	21.1004	-0.151259	0.383236	-0.39469	0.693071	0.913265
CNAG_02981	13272.4	-0.151065	0.109042	-1.38538	0.165937	0.591809
CNAG_02737	4.5868	-0.151004	0.484171	-0.311882	0.75513	NA
CNAG_05557	3382.38	-0.150981	0.0946506	-1.59514	0.11068	0.532702
CNAG_00587	1266.86	-0.1508	0.287738	-0.524086	0.600219	0.879931
CNAG_03245	23108.3	-0.150755	0.0961116	-1.56854	0.116756	0.540096
CNAG_03271	6732.08	-0.150677	0.110709	-1.36102	0.173507	0.603916
CNAG_03228	2846.63	-0.150614	0.305152	-0.49357	0.62161	0.887189
CNAG_03192	1642.84	-0.150603	0.106614	-1.41261	0.157772	0.584083
CNAG_12848	19.4036	-0.150516	0.43159	-0.348748	0.727278	0.92464
CNAG_05741	2558.08	-0.15032	0.100654	-1.49343	0.135324	0.56238
CNAG_13019	933.869	-0.150198	0.135846	-1.10565	0.268878	0.689152
CNAG_03036	3084.64	-0.150193	0.0932433	-1.61076	0.107232	0.529938
CNAG_04959	859.494	-0.150039	0.238462	-0.629192	0.529223	0.851233
CNAG_11015	0.931543	-0.150033	0.326558	-0.459437	0.64592	NA
CNAG_03321	5184.21	-0.149923	0.189137	-0.792667	0.427972	0.801504
CNAG_05707	2542.52	-0.149919	0.206405	-0.726333	0.467635	0.821089
CNAG_05349	12705.5	-0.149562	0.155815	-0.959863	0.337124	0.744342
CNAG_05797	12385.2	-0.149494	0.0857835	-1.74269	0.0813877	0.47937
CNAG_12281	27.775	-0.149375	0.430677	-0.346838	0.728713	0.92464
CNAG_12290	216.022	-0.149363	0.187266	-0.7976	0.425103	0.801184
CNAG_00800	665.501	-0.14918	0.198199	-0.75268	0.451642	0.815168
CNAG_03099	4000.93	-0.14903	0.266152	-0.559944	0.575518	0.867907
CNAG_05830	5320.42	-0.149	0.113417	-1.31374	0.188934	0.621597
CNAG_00540	261.465	-0.148968	0.23928	-0.622566	0.53357	0.853214
CNAG_06709	2716.79	-0.148956	0.102389	-1.4548	0.145725	0.569879
CNAG_12427	104.35	-0.148866	0.237415	-0.627031	0.530639	0.852149
CNAG_02785	3486.41	-0.148744	0.126874	-1.17238	0.241046	0.664938
CNAG_01481	728.784	-0.148568	0.255884	-0.580607	0.561505	0.863598
CNAG_03633	3171.68	-0.148558	0.170962	-0.868953	0.384873	0.77863
CNAG_01502	4408.06	-0.14851	0.127423	-1.16549	0.243822	0.666525
CNAG_04894	673.035	-0.148475	0.162369	-0.914432	0.36049	0.760557
CNAG_00564	2508.27	-0.148395	0.102304	-1.45054	0.146908	0.570955
CNAG_05344	7774.33	-0.148307	0.127774	-1.1607	0.245765	0.666829
CNAG_05752	3198.34	-0.148111	0.212423	-0.697245	0.485649	0.829525
CNAG_03653	5314.97	-0.147962	0.125986	-1.17444	0.24022	0.664658
CNAG_00469	3290.3	-0.147916	0.13092	-1.12982	0.258552	0.676711
CNAG_00697	8808.94	-0.147863	0.114886	-1.28704	0.19808	0.628357
CNAG_01582	525.96	-0.147814	0.139041	-1.0631	0.287736	0.70802
CNAG_04726	42367.3	-0.147756	0.0928513	-1.59132	0.111538	0.534237
CNAG_12456	19.2178	-0.147752	0.389714	-0.379128	0.704593	0.916274
CNAG_07005	1264.92	-0.147655	0.244279	-0.604454	0.545542	0.858777
CNAG_03019	3071.04	-0.147595	0.0931487	-1.5845	0.113079	0.536458
CNAG_02161	6650.38	-0.147557	0.121184	-1.21763	0.223365	0.6505
CNAG_12754	291.162	-0.14733	0.373616	-0.394335	0.693334	0.913265
CNAG_02685	13806.7	-0.147195	0.272361	-0.54044	0.588894	0.873838
CNAG_04495	793.639	-0.147122	0.129095	-1.13964	0.254435	0.674209
CNAG_01925	1769.58	-0.14707	0.14551	-1.01072	0.31215	0.729815
CNAG_05432	380.608	-0.146596	0.271349	-0.540248	0.589026	0.873838
CNAG_03699	8257.41	-0.14658	0.0913842	-1.604	0.108715	0.531675
CNAG_04984	2918.89	-0.146524	0.151054	-0.970007	0.332043	0.74193
CNAG_01626	4238.6	-0.146463	0.101106	-1.4486	0.147448	0.570955
CNAG_02177	14918.1	-0.146433	0.0599247	-2.44361	0.014541	0.236941
CNAG_01723	4882.06	-0.146366	0.110873	-1.32012	0.186795	0.620672
CNAG_03874	7694.67	-0.146334	0.105388	-1.38852	0.16498	0.591584
CNAG_05166	11381.8	-0.146168	0.109947	-1.32944	0.183704	0.616599
CNAG_07724	5062.46	-0.146117	0.150022	-0.973965	0.330074	0.739902
CNAG_12102	686.229	-0.145806	0.295129	-0.494041	0.621277	0.887174
CNAG_01816	545.803	-0.145793	0.169754	-0.858846	0.390425	0.783045
CNAG_06600	6394.24	-0.145719	0.15789	-0.922917	0.356051	0.757201
CNAG_00640	98336.5	-0.145617	0.102392	-1.42215	0.154982	0.58109
CNAG_01703	2596.66	-0.145348	0.104842	-1.38635	0.16564	0.591809
CNAG_07376	6326.41	-0.14534	0.061109	-2.37836	0.0173896	0.256913
CNAG_05080	15076.3	-0.145338	0.0935439	-1.55369	0.120258	0.543993
CNAG_04436	2486.56	-0.14521	0.112478	-1.291	0.196703	0.627483
CNAG_05250	4568.84	-0.145158	0.157717	-0.920368	0.357381	0.758445
CNAG_00803	4465.09	-0.145095	0.104297	-1.39117	0.164175	0.591103
CNAG_03184	6369.41	-0.145061	0.245793	-0.590175	0.555073	0.860646
CNAG_06594	11006.3	-0.144953	0.116241	-1.247	0.212398	0.642295
CNAG_02144	76043.8	-0.144942	0.0922154	-1.57178	0.116002	0.539605
CNAG_03649	1498.77	-0.144796	0.0877736	-1.64965	0.0990151	0.513523
CNAG_03502	10266.2	-0.14479	0.114973	-1.25934	0.207906	0.637086
CNAG_03281	57261.8	-0.144736	0.0911125	-1.58854	0.112164	0.534783
CNAG_12529	241.965	-0.144638	0.197188	-0.733503	0.463252	0.818827
CNAG_04873	1915.37	-0.144408	0.112455	-1.28414	0.199093	0.629186
CNAG_02325	1712.72	-0.144325	0.218172	-0.661519	0.508279	0.842928
CNAG_01152	61935.7	-0.144213	0.0933835	-1.54431	0.122512	0.547359
CNAG_00596	729.371	-0.144173	0.16957	-0.850231	0.395196	0.784372
CNAG_03063	10965.6	-0.144169	0.163047	-0.884217	0.376579	0.774624
CNAG_07508	3077.61	-0.143948	0.0911484	-1.57927	0.114275	0.536561
CNAG_03117	9254.98	-0.14392	0.170306	-0.845065	0.398074	0.78634
CNAG_01556	3889.46	-0.143713	0.126037	-1.14024	0.254188	0.674209
CNAG_07847	183.336	-0.143655	0.314046	-0.457434	0.647359	0.897712
CNAG_00981	851.356	-0.143654	0.297913	-0.482203	0.629662	0.890662
CNAG_02121	1447.45	-0.143608	0.310337	-0.46275	0.643544	0.895682
CNAG_01846	6420.53	-0.143481	0.331699	-0.432563	0.665332	0.90346
CNAG_07942	5850.44	-0.143467	0.174239	-0.823393	0.410285	0.795911
CNAG_10109	3.28125	-0.143444	0.47891	-0.299522	0.764542	NA
CNAG_02676	2505.88	-0.143442	0.125539	-1.14261	0.2532	0.67349
CNAG_02217	8390.28	-0.143429	0.194869	-0.736027	0.461715	0.818431
CNAG_12432	558.138	-0.143377	0.209755	-0.683548	0.494261	0.832616
CNAG_00606	3188.25	-0.143333	0.084449	-1.69727	0.0896451	0.496472
CNAG_07794	5369.88	-0.143208	0.142866	-1.00239	0.316154	0.732161
CNAG_01466	2700.01	-0.143204	0.200693	-0.713549	0.475506	0.824106
CNAG_12057	1403.12	-0.143075	0.147696	-0.968707	0.332691	0.742113
CNAG_03597	1388.82	-0.142856	0.126653	-1.12793	0.259349	0.678134
CNAG_05815	1347.64	-0.142757	0.120549	-1.18422	0.236326	0.658873
CNAG_01648	16379.6	-0.142526	0.109746	-1.29868	0.194053	0.625082
CNAG_03701	12754.1	-0.142303	0.097636	-1.45749	0.144981	0.568952
CNAG_06944	1176.61	-0.142122	0.112544	-1.26282	0.206656	0.636816
CNAG_07684	106.274	-0.142066	0.325311	-0.436706	0.662324	0.902472
CNAG_05748	4508.48	-0.141975	0.148228	-0.957814	0.338157	0.745332
CNAG_01039	8391.52	-0.14156	0.128077	-1.10527	0.269041	0.68924
CNAG_01795	2029.16	-0.141554	0.119758	-1.182	0.237206	0.659413
CNAG_04157	1473.55	-0.141553	0.174636	-0.810561	0.417618	0.798484
CNAG_07863	20808.7	-0.1415	0.0702737	-2.01356	0.044056	0.387099
CNAG_04807	3815.87	-0.141423	0.119182	-1.18661	0.235383	0.65805
CNAG_01671	654.989	-0.141385	0.183056	-0.772358	0.439902	0.809938
CNAG_00403	1110.65	-0.141327	0.104748	-1.34921	0.17727	0.60828
CNAG_06118	4092.36	-0.14121	0.201195	-0.701857	0.482768	0.828725
CNAG_04744	10190.3	-0.141205	0.323772	-0.436125	0.662746	0.902472
CNAG_05549	6689.98	-0.141193	0.152355	-0.926738	0.354063	0.757001
CNAG_12763	380.412	-0.141127	0.298391	-0.472959	0.636243	0.894249
CNAG_00048	415.82	-0.141072	0.15019	-0.939289	0.347582	0.753087
CNAG_13010	544.697	-0.141063	0.309631	-0.455585	0.648688	0.897779
CNAG_06208	49583.1	-0.140963	0.0844407	-1.66937	0.0950434	0.508023
CNAG_01331	2830.74	-0.140792	0.163113	-0.86316	0.388049	0.781842
CNAG_06785	10859.8	-0.140617	0.230106	-0.611095	0.541137	0.857454
CNAG_03451	4783.54	-0.140541	0.0609656	-2.30524	0.021153	0.273413
CNAG_13144	217.274	-0.140531	0.221629	-0.634081	0.526028	0.850698
CNAG_05280	6820.72	-0.140453	0.165997	-0.846118	0.397487	0.786169
CNAG_06232	1881.59	-0.140413	0.239651	-0.585906	0.557939	0.861721
CNAG_03169	207.146	-0.140154	0.200202	-0.700061	0.483889	0.829525
CNAG_02133	17635.4	-0.140033	0.17518	-0.799369	0.424076	0.801054
CNAG_05191	2431.3	-0.139958	0.199264	-0.702373	0.482447	0.828725
CNAG_13071	65.5349	-0.139923	0.324999	-0.430532	0.666809	0.90403
CNAG_00387	1840.19	-0.139853	0.119871	-1.1667	0.243332	0.665721
CNAG_03566	19436.5	-0.139833	0.481027	-0.290697	0.771283	0.939354
CNAG_02920	2692.17	-0.139603	0.0658328	-2.12057	0.0339579	0.348988
CNAG_06055	1775.87	-0.139466	0.0953944	-1.462	0.143742	0.568064
CNAG_06691	4488.3	-0.139459	0.0970112	-1.43756	0.150559	0.575607
CNAG_04317	178.353	-0.139385	0.255308	-0.54595	0.585101	0.8721
CNAG_04358	4488.03	-0.139371	0.0859421	-1.62169	0.104871	0.52472
CNAG_07787	23.5296	-0.139275	0.309446	-0.450078	0.652655	0.899727
CNAG_12603	313.534	-0.139213	0.191198	-0.728108	0.466547	0.820806
CNAG_04759	152.49	-0.139207	0.284161	-0.489888	0.624213	0.888787
CNAG_01424	2963.63	-0.139189	0.142448	-0.977125	0.328507	0.739654
CNAG_06687	7545.36	-0.139115	0.242299	-0.574145	0.56587	0.865684
CNAG_04796	8117.5	-0.139002	0.112091	-1.24008	0.214945	0.645158
CNAG_06623	60534	-0.138943	0.132133	-1.05154	0.293013	0.714461
CNAG_07445	67277.6	-0.138807	0.0658207	-2.10887	0.0349556	0.353978
CNAG_04838	4923.18	-0.138803	0.0933698	-1.48659	0.137123	0.564843
CNAG_08024	1352.42	-0.138758	0.120979	-1.14696	0.251399	0.670806
CNAG_01274	22605.5	-0.138755	0.0877584	-1.5811	0.113855	0.536458
CNAG_06609	181.186	-0.138361	0.205399	-0.673621	0.500552	0.83758
CNAG_00887	84.6887	-0.13836	0.306348	-0.451644	0.651526	0.898827
CNAG_02046	12699.3	-0.138263	0.105494	-1.31062	0.189987	0.622253
CNAG_08022	8113.09	-0.138144	0.0699335	-1.97536	0.0482271	0.402336
CNAG_00356	7974.65	-0.137987	0.0436043	-3.16452	0.0015534	0.0831436
CNAG_06103	15128.8	-0.137984	0.12972	-1.06371	0.287462	0.707782
CNAG_06080	6640.06	-0.137932	0.0793246	-1.73883	0.0820652	0.481228
CNAG_05518	5325.84	-0.137827	0.138701	-0.993703	0.320367	0.734471
CNAG_07995	4816.72	-0.137718	0.161282	-0.853899	0.393161	0.783714
CNAG_01654	5183.27	-0.137706	0.0794178	-1.73394	0.0829287	0.483801
CNAG_01980	380.003	-0.137704	0.471912	-0.2918	0.770439	0.939354
CNAG_01026	2923.9	-0.137686	0.191669	-0.718352	0.47254	0.823238
CNAG_00983	2920.76	-0.137465	0.186553	-0.736868	0.461203	0.81811
CNAG_10004	1.63939	-0.137375	0.447018	-0.307314	0.758604	NA
CNAG_05522	13126.9	-0.137311	0.0874398	-1.57034	0.116335	0.539796
CNAG_07015	4917.26	-0.137301	0.146185	-0.939232	0.347611	0.753087
CNAG_07985	783.238	-0.137262	0.269066	-0.510142	0.609952	0.882708
CNAG_06411	655.324	-0.137039	0.156845	-0.873725	0.382268	0.77671
CNAG_00771	21372.2	-0.136977	0.0929881	-1.47306	0.140734	0.565993
CNAG_12498	4925.6	-0.136897	0.117512	-1.16496	0.244034	0.666525
CNAG_00656	80206.1	-0.136779	0.0907159	-1.50778	0.131611	0.5588
CNAG_07914	13148.4	-0.136778	0.061795	-2.21341	0.0268692	0.311004
CNAG_00639	1062.48	-0.136717	0.154603	-0.884312	0.376528	0.774624
CNAG_04382	5779.28	-0.136659	0.0580811	-2.35289	0.0186282	0.263404
CNAG_00996	10420.2	-0.136477	0.0760061	-1.7956	0.0725579	0.465885
CNAG_06871	3478.43	-0.136398	0.114152	-1.19487	0.232136	0.657418
CNAG_07495	3.50641	-0.13637	0.47888	-0.284768	0.775822	NA
CNAG_03555	3327.05	-0.136319	0.253959	-0.536775	0.591423	0.87539
CNAG_02468	3659.73	-0.136294	0.0925692	-1.47234	0.140928	0.565993
CNAG_04091	441.669	-0.136265	0.141146	-0.965415	0.334337	0.743127
CNAG_03858	12984.4	-0.136263	0.151983	-0.896564	0.369951	0.769448
CNAG_13190	40.9952	-0.136256	0.385618	-0.353344	0.72383	0.923192
CNAG_04433	9133.14	-0.136209	0.131298	-1.03741	0.299546	0.720222
CNAG_10018	1.89239	-0.136078	0.44076	-0.308735	0.757523	NA
CNAG_05621	3843.72	-0.136067	0.0827242	-1.64482	0.100007	0.514911
CNAG_04659	40132.2	-0.136017	0.428926	-0.31711	0.75116	0.932666
CNAG_01258	14726.4	-0.135988	0.173866	-0.782145	0.43413	0.806523
CNAG_00693	3876.21	-0.135952	0.118066	-1.1515	0.249527	0.669802
CNAG_05161	5617.68	-0.135944	0.215887	-0.629698	0.528892	0.851233
CNAG_06499	5621.03	-0.135869	0.076975	-1.7651	0.0775462	0.473367
CNAG_03252	28.9069	-0.135797	0.485456	-0.27973	0.779684	0.940836
CNAG_02774	7008.12	-0.135787	0.0668288	-2.03186	0.0421674	0.379059
CNAG_05690	7629.23	-0.135781	0.0681914	-1.99118	0.0464611	0.396286
CNAG_00671	4973.88	-0.135692	0.0766485	-1.77032	0.0766738	0.472911
CNAG_03620	4560	-0.135417	0.115689	-1.17052	0.24179	0.665367
CNAG_02009	2480.7	-0.135259	0.136206	-0.993045	0.320688	0.734471
CNAG_07598	13260.7	-0.135201	0.128538	-1.05184	0.292873	0.714461
CNAG_02294	6941.5	-0.13499	0.112494	-1.19997	0.230152	0.655757
CNAG_00737	3861.5	-0.134988	0.181626	-0.743218	0.45735	0.817428
[truncated: 6,339 more rows]

## Sheet: 8_hour_C02_vs_Amb
CNAG_XXXXX	baseMean	log2FoldChange	lfcSE	stat	pvalue	padj
CNAG_06298	1536.17	-1.96614	0.464648	-4.23145	2.32185e-05	0.00141755
CNAG_05178	161.299	-1.89637	0.362296	-5.23431	1.65606e-07	5.70217e-05
CNAG_06388	2321.38	-1.77593	0.459082	-3.86844	NA	NA
CNAG_04163	7987.92	-1.75166	0.452957	-3.86716	0.00011011	0.00318926
CNAG_00052	604.869	-1.71956	0.463481	-3.7101	0.000207181	0.0046405
CNAG_07308	536.15	-1.62481	0.483262	-3.36217	0.000773313	0.00940451
CNAG_02417	852.932	-1.61366	0.440493	-3.66329	0.000248993	0.00509523
CNAG_01102	15970.1	-1.61044	0.475471	-3.38704	0.000706499	0.00895454
CNAG_03771	15456.8	-1.6083	0.454068	-3.54198	0.000397131	0.00640077
CNAG_00575	5031.31	-1.60719	0.464581	-3.45944	0.000541301	0.00762405
CNAG_02129	26503.2	-1.59331	0.466748	-3.41364	0.000641018	0.00839558
CNAG_02398	2453.83	-1.58734	0.455027	-3.48846	0.000485818	0.00717186
CNAG_01847	1780.22	-1.57769	0.344697	-4.57705	4.71585e-06	0.00049816
CNAG_03563	4433.11	-1.57135	0.429853	-3.65554	0.000256639	0.00518632
CNAG_05168	283.047	-1.55923	0.414536	-3.76139	0.000168975	0.00407677
CNAG_00638	3268.42	-1.55185	0.438434	-3.53953	0.000400845	0.00643409
CNAG_03333	1968.09	-1.5409	0.476587	-3.2332	0.0012241	0.012334
CNAG_02834	2346.24	-1.51229	0.439177	-3.44347	0.000574294	0.0078621
CNAG_03495	738.432	-1.51184	0.419709	-3.60211	0.00031564	0.00566987
CNAG_00834	1700.98	-1.50899	0.45086	-3.34692	0.000817162	0.00966377
CNAG_07481	886.513	-1.49312	0.419232	-3.56157	0.000368647	0.00610532
CNAG_02943	18430.3	-1.4916	0.411087	-3.62843	0.000285152	0.00546371
CNAG_04587	9395.94	-1.48392	0.472903	-3.1379	0.00170164	0.0148456
CNAG_02953	2740.86	-1.48171	0.346637	-4.27452	1.91545e-05	0.00127975
CNAG_00093	6435.67	-1.47864	0.407407	-3.62939	0.000284095	0.00546371
CNAG_04208	1024.53	-1.47644	0.284863	-5.183	2.18346e-07	5.77826e-05
CNAG_04361	5059.74	-1.47299	0.421208	-3.49706	0.000470422	0.00707773
CNAG_07765	5712.54	-1.46838	0.481083	-3.05225	0.00227136	0.0178624
CNAG_12669	3.32357	-1.46015	0.472942	-3.08737	0.00201938	NA
CNAG_02211	707.494	-1.44998	0.437752	-3.31234	0.000925207	0.0103615
CNAG_02591	1486.91	-1.44662	0.484123	-2.98813	0.00280689	0.0205444
CNAG_02986	7326.77	-1.44528	0.48496	-2.98021	0.0028805	0.0208474
CNAG_12277	120.831	-1.44457	0.428762	-3.36916	0.000753983	0.00928171
CNAG_04659	40132.2	-1.44295	0.428924	-3.36413	0.000767865	0.00939442
CNAG_05388	1452.54	-1.43988	0.424511	-3.39185	0.000694222	0.00886722
CNAG_12557	17.43	-1.43868	0.453767	-3.17053	0.00152161	NA
CNAG_00091	43444.6	-1.43739	0.484076	-2.96934	0.0029844	0.0213191
CNAG_04658	817.051	-1.42226	0.417159	-3.40939	0.000651089	0.00845442
CNAG_02542	5754.47	-1.41588	0.458474	-3.08824	0.00201349	0.0165157
CNAG_02966	935.152	-1.4156	0.440822	-3.21126	0.00132152	0.0129615
CNAG_06238	2995.31	-1.41496	0.443607	-3.18968	0.0014243	0.0135288
CNAG_02069	596.999	-1.40244	0.435092	-3.22331	0.00126719	0.0126833
CNAG_12933	226.73	-1.40077	0.420871	-3.32827	0.000873863	0.0101308
CNAG_03881	2759.8	-1.39927	0.472306	-2.96264	0.00305013	0.0215617
CNAG_00995	13423.5	-1.39702	0.464418	-3.00812	0.00262867	0.0198535
CNAG_03408	7649.96	-1.39662	0.478734	-2.91732	0.00353056	0.0236288
CNAG_00961	3785.52	-1.3954	0.44182	-3.1583	0.00158692	0.0142136
CNAG_12006	313.475	-1.39475	0.431394	-3.23313	0.00122441	0.012334
CNAG_04139	37.2405	-1.37969	0.375849	-3.67085	0.000241745	0.00502585
CNAG_04043	1511.94	-1.37439	0.475517	-2.89031	0.00384864	0.0248635
CNAG_00901	290.09	-1.37435	0.387616	-3.54564	0.000391658	0.00635184
CNAG_03187	481.137	-1.37074	0.442647	-3.09669	0.00195695	0.0162871
CNAG_07522	1777.05	-1.3636	0.345564	-3.946	7.94661e-05	0.00263215
CNAG_06109	23739.3	-1.36278	0.477362	-2.85482	0.00430619	0.0264634
CNAG_04106	5388.36	-1.36098	0.406502	-3.34803	0.000813883	0.00963958
CNAG_01031	8040.93	-1.35819	0.438639	-3.09636	0.0019591	0.0162871
CNAG_02989	2192.46	-1.35526	0.338578	-4.0028	6.2597e-05	0.00237436
CNAG_06404	1553.6	-1.35448	0.464518	-2.91589	0.00354679	0.0236664
CNAG_07338	779.825	-1.34977	0.323611	-4.17095	3.03333e-05	0.00155997
CNAG_00848	78117.9	-1.34971	0.465929	-2.89682	0.00376969	0.0244952
CNAG_06207	6339.43	-1.3455	0.485798	-2.76966	0.0056115	0.0316259
CNAG_00315	1004.57	-1.34466	0.484621	-2.77466	0.00552588	0.0312868
CNAG_00130	24653.9	-1.34098	0.42773	-3.1351	0.00171796	0.0149501
CNAG_02263	2075.36	-1.33564	0.398002	-3.35587	0.000791144	0.00947071
CNAG_02121	1447.45	-1.33314	0.310132	-4.29862	1.71866e-05	0.00116824
CNAG_04275	377.279	-1.3229	0.39841	-3.32044	0.000898746	0.0102115
CNAG_04970	845.011	-1.32218	0.439865	-3.00589	0.00264808	0.0199423
CNAG_01924	1467.25	-1.31685	0.348839	-3.77495	0.000160039	0.003994
CNAG_06664	883.85	-1.31612	0.414025	-3.17883	0.00147871	0.0137555
CNAG_01610	3362.86	-1.30915	0.326052	-4.01514	5.941e-05	0.0023209
CNAG_06868	3606.05	-1.30906	0.389726	-3.35892	0.000782472	0.00943624
CNAG_02751	24901.5	-1.30587	0.442498	-2.95113	0.00316613	0.0221374
CNAG_02362	1585.15	-1.30111	0.421979	-3.08335	0.00204683	0.0166494
CNAG_00851	412.55	-1.28921	0.402865	-3.2001	0.00137381	0.0132582
CNAG_04200	4099.28	-1.28869	0.388826	-3.3143	0.000918729	0.0103185
CNAG_07347	6491.09	-1.28732	0.415339	-3.09945	0.00193879	0.0162265
CNAG_05891	1240.12	-1.28279	0.432095	-2.96877	0.00298992	0.021325
CNAG_05531	2066.5	-1.28123	0.281259	-4.55535	5.22995e-06	0.000537928
CNAG_00485	9847.82	-1.28056	0.454915	-2.81495	0.00487846	0.0288999
CNAG_04386	961.061	-1.2781	0.435753	-2.9331	0.00335601	0.0228718
CNAG_00453	4105.95	-1.27548	0.45785	-2.78581	0.00533946	0.0307807
CNAG_04112	1464.91	-1.27314	0.40196	-3.16732	0.00153852	0.014017
CNAG_00727	1884.65	-1.26471	0.348389	-3.63017	0.000283232	0.00546371
CNAG_02230	25687.2	-1.26022	0.393861	-3.19966	0.00137589	0.0132618
CNAG_03372	2126.16	-1.26003	0.294711	-4.27548	1.90725e-05	0.00127975
CNAG_12386	32.1471	-1.25692	0.46885	-2.68086	0.00734342	0.0374568
CNAG_03565	7976.34	-1.24752	0.434358	-2.87211	0.00407736	0.0256624
CNAG_02335	27455.2	-1.24661	0.316093	-3.94381	8.01967e-05	0.00264514
CNAG_06999	1207.72	-1.24157	0.372173	-3.33599	0.000849959	0.0099463
CNAG_04938	3355.71	-1.24037	0.411873	-3.01154	0.00259923	0.0197072
CNAG_06334	2154.31	-1.24018	0.426949	-2.90475	0.0036755	0.0242255
CNAG_02499	12.1383	-1.23748	0.463186	-2.67166	0.00754761	NA
CNAG_06497	1000.73	-1.23153	0.434336	-2.83543	0.00457643	0.0277267
CNAG_00107	1527.48	-1.23148	0.351812	-3.50039	0.000464583	0.00704192
CNAG_04903	6665.99	-1.22653	0.476613	-2.57343	0.0100696	0.046298
CNAG_05119	1249.84	-1.22541	0.424165	-2.889	0.00386475	0.0248877
CNAG_12381	26.7832	-1.22389	0.353359	-3.46358	0.00053303	0.00756058
CNAG_05097	2472.49	-1.22352	0.337137	-3.62915	0.000284355	0.00546371
CNAG_04981	34682.8	-1.22095	0.471526	-2.58936	0.00961542	0.0447566
CNAG_01584	1457.39	-1.21946	0.426967	-2.85611	0.00428868	0.0264466
CNAG_06668	5050.81	-1.21798	0.314549	-3.87215	0.000107882	0.00316607
CNAG_01846	6420.53	-1.21792	0.331749	-3.67119	0.00024142	0.00502585
CNAG_00595	807.508	-1.21439	0.369911	-3.28292	0.00102737	0.0110619
CNAG_12408	23.2503	-1.21351	0.417001	-2.91008	0.00361339	NA
CNAG_01750	14289.6	-1.21294	0.307183	-3.94859	7.86129e-05	0.00263215
CNAG_12892	74.3161	-1.21224	0.382476	-3.16945	0.0015273	0.0139472
CNAG_03002	1322.46	-1.21034	0.483363	-2.504	0.0122798	0.0527715
CNAG_06169	10209.5	-1.20999	0.399761	-3.02678	0.00247177	0.0190523
CNAG_04103	511.129	-1.20838	0.216475	-5.58208	2.37656e-08	1.54813e-05
CNAG_05383	3612.04	-1.20101	0.338104	-3.5522	0.00038203	0.00622152
CNAG_07840	61.1431	-1.20094	0.446134	-2.69188	0.00710502	0.0368791
CNAG_03873	7484.79	-1.19789	0.311819	-3.84162	0.000122225	0.00338434
CNAG_12220	118.662	-1.19678	0.477648	-2.50556	0.0122256	0.0526253
CNAG_00054	1704.43	-1.19536	0.351971	-3.39618	0.000683329	0.00879998
CNAG_02877	9567.16	-1.19417	0.474749	-2.51538	0.0118906	0.0518397
CNAG_06075	23320.3	-1.18471	0.434799	-2.72474	0.00643525	0.0344474
CNAG_07319	3914.93	-1.18394	0.383228	-3.08939	0.00200566	0.0164861
CNAG_01962	354.088	-1.18263	0.338006	-3.49885	0.000467266	0.00706261
CNAG_13051	69.4299	-1.18249	0.266131	-4.44325	8.86083e-06	0.000752881
CNAG_06771	681.906	-1.18088	0.447487	-2.63892	0.00831706	0.0407359
CNAG_04090	5408.88	-1.1798	0.280591	-4.20467	2.6146e-05	0.00151395
CNAG_06791	2920.17	-1.17928	0.395536	-2.98148	0.00286856	0.0207818
CNAG_07684	106.274	-1.17864	0.326059	-3.61479	0.00030059	0.00560664
CNAG_01493	1393.29	-1.17821	0.417961	-2.81893	0.00481833	0.0286643
CNAG_05410	1672.07	-1.17336	0.326826	-3.59015	0.000330483	0.0057686
CNAG_03564	1232.69	-1.17325	0.414557	-2.83013	0.00465286	0.027978
CNAG_03991	2734.97	-1.16958	0.227584	-5.1391	2.76055e-07	6.7435e-05
CNAG_00360	2037.87	-1.16873	0.334661	-3.49229	0.00047889	0.00713579
CNAG_04737	85928.4	-1.16792	0.430275	-2.71436	0.00664042	0.0353117
CNAG_07557	955.425	-1.16741	0.352742	-3.30951	0.000934585	0.0104215
CNAG_04326	3688.25	-1.16431	0.385417	-3.0209	0.00252023	0.0192577
CNAG_03566	19436.5	-1.16318	0.481026	-2.41812	0.0156011	0.0618428
CNAG_06494	4939.49	-1.15822	0.323532	-3.57991	0.000343711	0.00590504
CNAG_04076	769.154	-1.15698	0.307354	-3.76434	0.000166992	0.0040666
CNAG_03059	1353.29	-1.1535	0.271079	-4.2552	2.08862e-05	0.00134932
CNAG_01585	1400.44	-1.15027	0.485402	-2.36972	0.0178014	0.0679828
CNAG_04070	993.683	-1.15002	0.238873	-4.81434	1.47687e-06	0.000226367
CNAG_07775	1044.16	-1.14975	0.361766	-3.17815	0.00148218	0.0137555
CNAG_03060	3020.31	-1.14683	0.232751	-4.92726	8.33889e-07	0.000139143
CNAG_03794	2737.17	-1.14329	0.265242	-4.31038	1.62977e-05	0.00113749
CNAG_02864	2357.77	-1.13819	0.485832	-2.34276	0.0191417	0.0712527
CNAG_07533	274.06	-1.13727	0.464244	-2.44972	0.0142966	0.0583227
CNAG_03178	1033.03	-1.13429	0.321306	-3.53024	0.000415179	0.00654326
CNAG_12031	10.8303	-1.13173	0.469376	-2.41113	0.0159031	NA
CNAG_05871	1668.85	-1.12969	0.352807	-3.20202	0.00136469	0.0132191
CNAG_03572	17312.4	-1.1269	0.311621	-3.61625	0.000298897	0.00559592
CNAG_05889	2688.06	-1.1262	0.301961	-3.72961	0.000191773	0.00439615
CNAG_04833	1442.84	-1.12617	0.444989	-2.53079	0.0113806	0.0503061
CNAG_04886	1228.72	-1.12439	0.332963	-3.37692	0.000733023	0.00916806
CNAG_06827	567.507	-1.12301	0.380872	-2.94853	0.00319287	0.0222052
CNAG_01418	1376.58	-1.12086	0.291524	-3.84484	0.000120633	0.00338434
CNAG_04270	636.089	-1.11977	0.380294	-2.94449	0.00323488	0.0223031
CNAG_04744	10190.3	-1.11895	0.323757	-3.45614	0.000547967	0.00768025
CNAG_06800	7674.65	-1.11646	0.447619	-2.49422	0.0126234	0.0538009
CNAG_04409	1186.02	-1.11587	0.295141	-3.78081	0.000156316	0.00395445
CNAG_04746	1445.33	-1.11528	0.266067	-4.19174	2.76826e-05	0.00153471
CNAG_03142	24652.3	-1.11248	0.449585	-2.47446	0.0133438	0.0558395
CNAG_03232	2055.07	-1.11164	0.405004	-2.74476	0.00605551	0.0330327
CNAG_01558	58483.2	-1.1087	0.386304	-2.87002	0.00410452	0.0257504
CNAG_05915	11132.4	-1.10608	0.478309	-2.31248	0.020751	0.0750537
CNAG_03609	1748.76	-1.10303	0.335938	-3.28345	0.00102544	0.0110619
CNAG_06064	864.872	-1.10296	0.3012	-3.66189	0.000250363	0.00510989
CNAG_06977	95.9317	-1.10109	0.37686	-2.92174	0.00348079	0.0234942
CNAG_04459	1775.3	-1.09979	0.303515	-3.62352	0.000290626	0.00554063
CNAG_02892	799.563	-1.0986	0.346471	-3.17083	0.00152002	0.013923
CNAG_05095	3796.05	-1.09665	0.298869	-3.66935	0.000243168	0.00503744
CNAG_00745	4399.27	-1.09583	0.204693	-5.35356	8.62401e-08	3.5481e-05
CNAG_06577	4362.64	-1.09566	0.440401	-2.48787	0.0128509	0.0544771
CNAG_04849	1069.04	-1.09482	0.267084	-4.09914	4.14682e-05	0.00195409
CNAG_01043	10440.8	-1.09244	0.415789	-2.62739	0.00860416	0.0416463
CNAG_13071	65.5349	-1.09158	0.323204	-3.37738	0.000731791	0.00916733
CNAG_07551	1626.07	-1.08889	0.455363	-2.39125	0.016791	0.0651068
CNAG_13048	44.844	-1.08742	0.390002	-2.78824	0.00529957	0.0306411
CNAG_04787	652.405	-1.08719	0.325252	-3.34261	0.00082994	0.00977055
CNAG_01690	1895.24	-1.0828	0.289316	-3.74263	0.000182101	0.00424921
CNAG_00036	1501.17	-1.08215	0.292588	-3.69855	0.000216835	0.0047479
CNAG_05572	1035.21	-1.0773	0.428884	-2.51186	0.0120097	0.052156
CNAG_01751	7170.94	-1.07463	0.335533	-3.20275	0.00136123	0.0132191
CNAG_12210	334.198	-1.0738	0.345647	-3.10664	0.00189228	0.015974
CNAG_12719	12.9735	-1.0712	0.452564	-2.36697	0.0179345	NA
CNAG_00522	11244.7	-1.07009	0.290331	-3.68575	0.000228033	0.0048731
CNAG_03113	22569.7	-1.06977	0.317339	-3.37108	0.000748754	0.00928171
CNAG_02969	1604.86	-1.06852	0.245597	-4.35069	1.35708e-05	0.00102993
CNAG_00254	1426.37	-1.0652	0.317192	-3.35822	0.000784456	0.00943624
CNAG_01691	2025.36	-1.06519	0.338536	-3.14645	0.00165264	0.0145974
CNAG_00637	2521.7	-1.06048	0.297665	-3.56266	0.000367116	0.00610532
CNAG_07647	2743.34	-1.05391	0.284141	-3.70912	0.00020798	0.00464508
CNAG_03685	1016.5	-1.05323	0.271603	-3.87785	0.000105385	0.00313944
CNAG_04083	1964.43	-1.0521	0.270691	-3.88672	0.000101607	0.00310257
CNAG_00162	23714.6	-1.04828	0.45263	-2.31598	0.0205595	0.0746116
CNAG_05278	97.2932	-1.0466	0.360967	-2.89944	0.00373835	0.0244132
CNAG_12540	301.49	-1.04627	0.394195	-2.65418	0.00795004	0.0394074
CNAG_02313	543.308	-1.04229	0.377063	-2.76423	0.00570573	0.0320184
CNAG_02070	15976.2	-1.04198	0.479301	-2.17396	0.0297081	0.0956852
CNAG_05727	43.1281	-1.04171	0.346901	-3.00289	0.00267426	0.0199752
CNAG_04197	4074.85	-1.0417	0.26172	-3.98021	6.88532e-05	0.00248103
CNAG_06576	75663.3	-1.03895	0.454829	-2.28426	0.0223562	0.0787201
CNAG_02312	2295.62	-1.03673	0.303708	-3.41357	0.000641187	0.00839558
CNAG_03067	740.912	-1.036	0.237163	-4.3683	1.25218e-05	0.000978827
CNAG_05921	2971.37	-1.0349	0.326865	-3.16615	0.00154469	0.0140568
CNAG_01252	819.409	-1.03424	0.316754	-3.26511	0.00109421	0.0115748
CNAG_04248	1312.51	-1.03378	0.266386	-3.88074	0.000104139	0.00313098
CNAG_06533	3866.54	-1.03302	0.263547	-3.91969	8.86617e-05	0.00285213
CNAG_03689	3701.73	-1.03213	0.25229	-4.09104	4.2945e-05	0.00195409
CNAG_07005	1264.92	-1.03019	0.243832	-4.225	2.38942e-05	0.00142581
CNAG_02006	1060.45	-1.02769	0.281259	-3.65389	0.000258294	0.00518632
CNAG_06156	1182.59	-1.02645	0.295566	-3.47283	0.000514992	0.00742748
CNAG_07763	1023.36	-1.02536	0.319173	-3.21255	0.00131561	0.0129542
CNAG_04920	5490.78	-1.02316	0.262976	-3.89069	9.99582e-05	0.00309275
CNAG_06297	1440.09	-1.02297	0.3576	-2.86065	0.00422779	0.0261668
CNAG_04265	3003.28	-1.02075	0.279303	-3.65463	0.000257552	0.00518632
CNAG_03492	41096.9	-1.0189	0.475722	-2.14181	0.032209	0.10136
CNAG_02768	1000.86	-1.01518	0.311179	-3.26238	0.00110482	0.0116393
CNAG_06294	1368.75	-1.01008	0.199148	-5.072	3.93647e-07	8.83049e-05
CNAG_02599	253.609	-1.00872	0.279149	-3.61355	0.000302037	0.00560664
CNAG_01052	23213.5	-1.00834	0.293571	-3.43475	0.00059309	0.00804893
CNAG_04293	2031.53	-1.00834	0.25981	-3.88106	0.000104004	0.00313098
CNAG_04108	1289.96	-1.00612	0.331936	-3.03106	0.00243699	0.0188241
CNAG_04315	2520.99	-1.00513	0.266165	-3.77633	0.000159154	0.003994
CNAG_01387	2142.73	-1.00479	0.266776	-3.7664	0.000165621	0.00405609
CNAG_02968	552.861	-1.00252	0.364073	-2.75363	0.00589386	0.0325948
CNAG_04757	3435.69	-1.00179	0.239281	-4.18667	2.83079e-05	0.00153525
CNAG_01821	2739.84	-0.999151	0.318179	-3.14021	0.00168826	0.014795
CNAG_13152	12.4257	-0.998315	0.452712	-2.20519	0.027441	NA
CNAG_05167	14216.8	-0.996291	0.406803	-2.44908	0.0143223	0.0583254
CNAG_02550	2514.9	-0.995752	0.411631	-2.41904	0.0155614	0.0617794
CNAG_07607	2183.63	-0.995542	0.257513	-3.86599	0.000110638	0.00319134
CNAG_02041	7579.28	-0.990789	0.47338	-2.09301	0.0363482	0.110117
CNAG_04353	1878.33	-0.99025	0.271701	-3.64463	0.000267779	0.00531276
CNAG_05874	3169.89	-0.989903	0.464686	-2.13026	0.0331501	0.1032
CNAG_04953	14683.9	-0.989199	0.309044	-3.20084	0.0013703	0.0132406
CNAG_06560	1229.68	-0.988853	0.189099	-5.22929	1.70158e-07	5.70217e-05
CNAG_02438	272.801	-0.986785	0.395092	-2.49761	0.0125034	0.0534572
CNAG_01632	936.154	-0.985695	0.242214	-4.06952	4.711e-05	0.00204588
CNAG_03727	7352.39	-0.983642	0.288045	-3.41489	0.000638075	0.00839558
CNAG_02047	1361.63	-0.98361	0.405774	-2.42403	0.0153492	0.0612348
CNAG_01417	4009.64	-0.983523	0.415927	-2.36465	0.0180471	0.068549
CNAG_02673	16563.7	-0.982764	0.281547	-3.49059	0.000481954	0.00714883
CNAG_06267	9618.71	-0.98108	0.434874	-2.25601	0.0240701	0.0826249
CNAG_05890	133.65	-0.980802	0.298966	-3.28064	0.00103571	0.0111058
CNAG_03791	4053.56	-0.978882	0.258521	-3.78647	0.000152803	0.00389834
CNAG_00807	3153.57	-0.976565	0.290744	-3.35885	0.000782668	0.00943624
CNAG_07939	10045.8	-0.976126	0.479393	-2.03617	0.0417331	0.121094
CNAG_01481	728.784	-0.975532	0.255413	-3.81943	0.000133758	0.00356856
CNAG_06152	385.842	-0.975129	0.367303	-2.65484	0.00793462	0.0394074
CNAG_07482	3966.68	-0.974795	0.315894	-3.08583	0.00202984	0.0165976
CNAG_07317	1696.31	-0.966419	0.243514	-3.96864	7.2283e-05	0.00251127
CNAG_06879	1066.39	-0.965663	0.270289	-3.57271	0.000353311	0.00600398
CNAG_05864	13024.7	-0.964907	0.314209	-3.07091	0.00213408	0.0171284
CNAG_03039	1781.31	-0.963365	0.254633	-3.78334	0.000154735	0.00392717
CNAG_06286	417.825	-0.962583	0.319785	-3.01009	0.00261168	0.0197633
CNAG_02444	1798.64	-0.962255	0.298746	-3.22098	0.00127753	0.0127704
CNAG_01261	14068.4	-0.960173	0.242116	-3.96575	7.31647e-05	0.00251951
CNAG_05155	10144.6	-0.958464	0.296342	-3.23432	0.00121934	0.0123307
CNAG_02978	494.145	-0.956805	0.300302	-3.18615	0.00144181	0.0135743
CNAG_06427	1456.24	-0.955095	0.313986	-3.04184	0.00235139	0.0182894
CNAG_05643	729.995	-0.954521	0.324112	-2.94503	0.00322922	0.0223031
CNAG_05607	4814.04	-0.95337	0.289373	-3.2946	0.000985612	0.01083
CNAG_03785	9641.99	-0.951819	0.244644	-3.89063	9.99843e-05	0.00309275
CNAG_00139	17042.3	-0.950807	0.316461	-3.0045	0.00266018	0.0199564
CNAG_05665	2442.45	-0.950605	0.258104	-3.68304	0.00023047	0.0048731
CNAG_03692	2809.88	-0.9505	0.324514	-2.929	0.00340055	0.0230948
CNAG_03079	1204.55	-0.945475	0.281385	-3.36007	0.000779215	0.00943624
CNAG_05732	1290.4	-0.943634	0.363534	-2.59573	0.00943911	0.044078
CNAG_02298	4973.26	-0.942498	0.237477	-3.96879	7.22376e-05	0.00251127
CNAG_07512	5399.98	-0.940495	0.276023	-3.40731	0.000656062	0.00849079
CNAG_06954	4.46242	-0.939419	0.485315	-1.93569	0.0529061	NA
CNAG_05994	10347.1	-0.939142	0.301177	-3.11824	0.00181936	0.0155601
CNAG_02655	4983.11	-0.936693	0.28868	-3.24475	0.00117555	0.0120752
CNAG_02029	954.273	-0.93505	0.345249	-2.70834	0.00676208	0.0358367
CNAG_00181	1965.08	-0.934986	0.248768	-3.75847	0.000170954	0.00409923
CNAG_02568	8471.23	-0.934847	0.235253	-3.97379	7.07389e-05	0.00250981
CNAG_03525	3313.37	-0.933533	0.239854	-3.8921	9.93821e-05	0.00309275
CNAG_02815	19836.8	-0.932795	0.317786	-2.9353	0.00333229	0.0227896
CNAG_06616	1229.06	-0.931675	0.350696	-2.65665	0.00789214	0.0393449
CNAG_06574	4700.42	-0.931042	0.399544	-2.33026	0.0197922	0.073048
CNAG_03162	1478.39	-0.926484	0.248674	-3.72569	0.000194778	0.00443902
CNAG_00691	3406.98	-0.924886	0.251125	-3.68297	0.000230533	0.0048731
CNAG_03738	2132.6	-0.924574	0.416252	-2.22119	0.0263382	0.0875601
CNAG_02072	2568.6	-0.924504	0.337248	-2.74132	0.00611934	0.0332186
CNAG_03882	1647.76	-0.910013	0.248034	-3.66891	0.000243591	0.00503744
CNAG_07401	665.654	-0.909448	0.302625	-3.0052	0.0026541	0.0199564
CNAG_07838	2260.8	-0.90737	0.236761	-3.83242	0.000126888	0.00346634
CNAG_00732	5390.37	-0.906729	0.398947	-2.27281	0.0230379	0.0802528
CNAG_03227	2134.84	-0.906471	0.311119	-2.91358	0.00357313	0.0237392
CNAG_04927	119.119	-0.9046	0.193587	-4.67284	2.97064e-06	0.000357253
CNAG_12558	192.609	-0.904461	0.327487	-2.76182	0.00574802	0.0321864
CNAG_07164	2976.97	-0.903013	0.162606	-5.55339	2.80188e-08	1.68479e-05
CNAG_06201	2619.99	-0.90169	0.265915	-3.39089	0.000696663	0.0088694
CNAG_06409	1125.62	-0.900832	0.265535	-3.39252	0.000692518	0.00885993
CNAG_03667	7868.58	-0.898612	0.385776	-2.32936	0.0198399	0.0731776
CNAG_05077	4605.76	-0.893118	0.231431	-3.8591	0.000113804	0.00325863
CNAG_12156	57.5133	-0.892464	0.478615	-1.86468	0.0622263	0.162009
CNAG_01970	4343.7	-0.891866	0.290198	-3.0733	0.00211706	0.0170433
CNAG_01341	7412.68	-0.890967	0.32317	-2.75696	0.00583407	0.032459
CNAG_00850	247.566	-0.890875	0.286456	-3.10999	0.00187096	0.0158604
CNAG_00454	516.494	-0.889949	0.441454	-2.01595	0.0438052	0.125938
CNAG_01753	8899.28	-0.889375	0.241404	-3.68418	0.000229438	0.0048731
CNAG_04958	2399.9	-0.888401	0.231265	-3.84149	0.000122291	0.00338434
CNAG_12824	36.7678	-0.887786	0.375196	-2.36619	0.017972	0.0683968
CNAG_04585	1889.61	-0.885255	0.3003	-2.9479	0.00319941	0.0222309
CNAG_06106	4423.46	-0.884783	0.247717	-3.57175	0.0003546	0.00600528
CNAG_05463	3030.39	-0.884438	0.22687	-3.89843	9.68178e-05	0.00306407
CNAG_00849	372.111	-0.88431	0.227416	-3.88851	0.000100861	0.00310257
CNAG_04067	2454.54	-0.884256	0.294454	-3.00303	0.00267305	0.0199752
CNAG_01986	1824.85	-0.881654	0.316619	-2.78459	0.0053596	0.0308285
CNAG_05251	10437.8	-0.881358	0.388607	-2.26799	0.0233297	0.0808728
CNAG_01534	1321.36	-0.880616	0.30653	-2.87286	0.00406778	0.0256614
CNAG_03228	2846.63	-0.879578	0.304977	-2.88408	0.00392558	0.0250115
CNAG_02023	535.108	-0.87892	0.456318	-1.92611	0.0540902	0.146763
CNAG_01464	33262.1	-0.878295	0.3142	-2.79534	0.00518457	0.0302221
CNAG_04751	775.598	-0.876838	0.321116	-2.7306	0.00632196	0.0339881
CNAG_06355	1031.54	-0.875341	0.313755	-2.78989	0.00527264	0.0305515
CNAG_00563	1274.45	-0.874332	0.237166	-3.68658	0.00022729	0.0048731
CNAG_05872	9852.22	-0.873896	0.3251	-2.68808	0.00718636	0.0371297
CNAG_07309	1820.14	-0.873771	0.328141	-2.66279	0.00774951	0.0388569
CNAG_07591	1456.05	-0.871592	0.251239	-3.46918	0.000522056	0.00747419
CNAG_03268	7259.53	-0.871204	0.296451	-2.93878	0.00329505	0.0226021
CNAG_05169	1161.58	-0.870662	0.225365	-3.86335	0.000111842	0.00321424
CNAG_02118	8876.22	-0.867482	0.377203	-2.29978	0.0214609	0.0768131
CNAG_06781	1265.27	-0.866938	0.235148	-3.68677	0.000227119	0.0048731
CNAG_06074	4289.17	-0.864831	0.288904	-2.99348	0.00275812	0.0203591
CNAG_06154	1201.49	-0.863311	0.272798	-3.16465	0.00155268	0.0140967
CNAG_02000	2993.47	-0.862391	0.231331	-3.72795	0.000193043	0.00441234
CNAG_07350	1593.26	-0.862158	0.252563	-3.41363	0.000641032	0.00839558
CNAG_12315	454.141	-0.858898	0.397594	-2.16024	0.030754	0.0980841
CNAG_00161	727.553	-0.858171	0.373126	-2.29995	0.021451	0.0768129
CNAG_04691	312.33	-0.858147	0.348607	-2.46164	0.0138303	0.0574144
CNAG_00123	1258.5	-0.857649	0.43338	-1.97898	0.0478187	0.133861
CNAG_07745	151547	-0.857063	0.291721	-2.93795	0.00330388	0.0226151
CNAG_06732	4479.65	-0.85302	0.224132	-3.80588	0.000141302	0.00371904
CNAG_05993	6847.46	-0.852275	0.299673	-2.84402	0.00445488	0.0270878
CNAG_04186	1224.86	-0.852046	0.237227	-3.5917	0.000328533	0.0057686
CNAG_04789	3397.42	-0.850633	0.240451	-3.53766	0.000403689	0.00646613
CNAG_07359	7138.4	-0.8506	0.22248	-3.82326	0.000131698	0.00354994
CNAG_04314	5909.2	-0.850589	0.272727	-3.11883	0.00181569	0.0155601
CNAG_06301	11068	-0.850482	0.225846	-3.76576	0.000166042	0.00405609
CNAG_02165	3429.5	-0.849805	0.199359	-4.26269	2.01982e-05	0.0013268
CNAG_06291	1187.76	-0.848352	0.44877	-1.89039	0.0587055	0.155877
CNAG_06884	1063.58	-0.846493	0.295633	-2.86332	0.00419226	0.02605
CNAG_02407	4144.07	-0.842919	0.178151	-4.73149	2.22873e-06	0.00030038
CNAG_00554	2284.61	-0.842116	0.270327	-3.11517	0.00183836	0.0156712
CNAG_06396	8717.72	-0.840221	0.392483	-2.14078	0.0322915	0.101538
CNAG_03946	1863.77	-0.839916	0.17845	-4.70674	2.5171e-06	0.000328941
CNAG_02470	1734.45	-0.838301	0.301448	-2.78091	0.00542061	0.0310879
CNAG_02282	2976.09	-0.837921	0.292498	-2.86471	0.00417395	0.0259753
CNAG_01028	697.177	-0.837264	0.225069	-3.72003	0.000199197	0.00450035
CNAG_05641	5020.75	-0.837008	0.483865	-1.72984	0.0836591	0.20009
CNAG_03511	315.664	-0.83635	0.262778	-3.18273	0.00145896	0.013642
CNAG_07800	2244.81	-0.836316	0.238026	-3.51355	0.000442165	0.00685794
CNAG_03040	15359.4	-0.835702	0.219538	-3.80663	0.000140871	0.00371904
CNAG_06290	2299.86	-0.835438	0.251173	-3.32614	0.000880583	0.0101308
CNAG_01803	7880.55	-0.833466	0.410872	-2.02853	0.0425063	0.122882
CNAG_12928	16.5354	-0.833257	0.45347	-1.83751	0.066134	NA
CNAG_02288	550.036	-0.833172	0.187348	-4.44718	8.70044e-06	0.000747377
CNAG_01942	976.646	-0.831982	0.430842	-1.93106	0.0534756	0.145449
CNAG_06862	912.768	-0.831764	0.262965	-3.16302	0.00156142	0.0141433
CNAG_03992	1909.01	-0.828851	0.202331	-4.09651	4.19428e-05	0.00195409
CNAG_01422	4840.83	-0.827063	0.235626	-3.51007	0.000447995	0.00692091
CNAG_02205	1409.88	-0.826828	0.231059	-3.57843	0.000345665	0.00591261
CNAG_00167	1363.19	-0.825946	0.258762	-3.19191	0.00141336	0.0135064
CNAG_03553	7161.8	-0.825827	0.21916	-3.76814	0.000164467	0.00405565
CNAG_07629	3066.78	-0.825537	0.278252	-2.96687	0.00300846	0.0214012
CNAG_12046	670.99	-0.823669	0.322336	-2.55531	0.0106093	0.0479658
CNAG_02899	344.144	-0.822916	0.348339	-2.3624	0.0181572	0.0689292
CNAG_06554	2029.95	-0.822249	0.280419	-2.93222	0.00336551	0.0229166
CNAG_06121	3586.68	-0.822036	0.294867	-2.78782	0.00530641	0.030658
CNAG_04889	1441.03	-0.82165	0.311571	-2.63712	0.00836138	0.0408481
CNAG_02734	38.5483	-0.821525	0.340663	-2.41155	0.0158849	0.0626501
CNAG_02219	2397.03	-0.816654	0.303446	-2.69127	0.0071181	0.0369225
CNAG_02355	1414.27	-0.816623	0.236882	-3.44738	0.000566044	0.00783223
CNAG_02753	7297.33	-0.816068	0.235397	-3.46677	0.000526745	0.00751381
CNAG_02226	2959.13	-0.81579	0.226212	-3.60631	0.000310586	0.00564611
CNAG_04092	263.301	-0.814883	0.23314	-3.49526	0.000473605	0.00709443
CNAG_01742	10166.9	-0.814642	0.326787	-2.49289	0.0126709	0.0539479
CNAG_02300	10474.8	-0.814342	0.195022	-4.17564	2.97148e-05	0.00153989
CNAG_13204	240.133	-0.812544	0.295094	-2.75351	0.005896	0.0325948
CNAG_01419	3876.68	-0.812085	0.25905	-3.13486	0.00171934	0.0149501
CNAG_07822	910.884	-0.811778	0.270344	-3.00276	0.00267546	0.0199752
CNAG_04316	3741.46	-0.811247	0.199979	-4.05665	4.97806e-05	0.00211486
CNAG_01913	922.406	-0.811185	0.249787	-3.24751	0.00116422	0.0120319
CNAG_01386	409.298	-0.811105	0.297698	-2.72459	0.00643823	0.0344474
CNAG_02460	2475.61	-0.810664	0.228801	-3.5431	0.000395447	0.00638679
CNAG_05008	321.776	-0.809682	0.244894	-3.30625	0.000945522	0.0104839
CNAG_03666	777.971	-0.808337	0.223211	-3.6214	0.000293016	0.00555948
CNAG_08008	2598.49	-0.804899	0.210594	-3.82204	0.00013235	0.00355099
CNAG_02526	599.552	-0.80088	0.432076	-1.85356	0.0638019	0.164601
CNAG_00497	7426.2	-0.799774	0.171857	-4.65371	3.26008e-06	0.000380358
CNAG_05309	7032.78	-0.799722	0.195903	-4.08223	4.46053e-05	0.0020018
CNAG_00057	17337.3	-0.799418	0.252192	-3.16988	0.00152503	0.0139429
CNAG_05326	336.401	-0.797225	0.17633	-4.5212	6.14894e-06	0.000593411
CNAG_10048	3.82818	-0.797093	0.48414	-1.64641	0.0996791	NA
CNAG_01032	1120.63	-0.793724	0.1893	-4.19293	2.75373e-05	0.00153471
CNAG_06958	4.63904	-0.79368	0.484062	-1.63962	0.101083	NA
CNAG_00134	1418.71	-0.792914	0.218862	-3.6229	0.000291313	0.00554063
CNAG_07695	8712.53	-0.792465	0.304979	-2.59843	0.00936524	0.0437847
CNAG_06216	2564.69	-0.791824	0.315885	-2.50669	0.0121869	0.0525164
CNAG_06924	2467.82	-0.791719	0.296731	-2.66813	0.0076274	0.0383677
CNAG_06658	4846.44	-0.791638	0.278012	-2.8475	0.00440646	0.0269314
CNAG_03365	2960.49	-0.791529	0.210754	-3.7557	0.000172859	0.00411964
CNAG_04117	1419.47	-0.791346	0.24839	-3.1859	0.00144304	0.0135743
CNAG_00363	13596.8	-0.790951	0.233815	-3.38281	0.000717492	0.00903162
CNAG_07874	175.71	-0.790898	0.273986	-2.88664	0.00389378	0.0249397
CNAG_05333	38.7422	-0.790524	0.410421	-1.92613	0.0540885	0.146763
CNAG_12727	296.991	-0.789826	0.237815	-3.32118	0.000896369	0.0101993
CNAG_06459	3742.36	-0.788835	0.277234	-2.84538	0.00443589	0.0270878
CNAG_12786	668.491	-0.787446	0.290583	-2.70988	0.00673066	0.0357186
CNAG_04926	638.988	-0.786338	0.172188	-4.56675	4.95346e-06	0.000516283
CNAG_02685	13806.7	-0.785732	0.272311	-2.88542	0.0039089	0.0249758
CNAG_05723	4793.58	-0.783715	0.335217	-2.33793	0.0193909	0.0719746
CNAG_04027	13170.7	-0.781987	0.205777	-3.80016	0.000144605	0.00376038
CNAG_04668	854.272	-0.780876	0.286786	-2.72285	0.00647218	0.0346054
CNAG_06670	1782.08	-0.779881	0.239111	-3.26159	0.00110788	0.0116559
CNAG_00648	2133.83	-0.778812	0.271805	-2.86534	0.00416567	0.0259567
CNAG_02690	1238.16	-0.77796	0.223058	-3.48771	0.000487176	0.00717186
CNAG_01615	1687.93	-0.777391	0.262595	-2.96041	0.00307226	0.0216554
CNAG_00566	1545.27	-0.777353	0.234348	-3.31709	0.0009096	0.0102732
CNAG_05236	2476.07	-0.776587	0.148872	-5.21647	1.82364e-07	5.70217e-05
CNAG_06750	1548.64	-0.775944	0.163443	-4.7475	2.05946e-06	0.000285577
CNAG_05250	4568.84	-0.775795	0.15747	-4.92663	8.36602e-07	0.000139143
CNAG_03347	3378.24	-0.775638	0.144738	-5.35891	8.37266e-08	3.5481e-05
CNAG_04288	1064.54	-0.775084	0.352247	-2.2004	0.0277787	0.0910083
CNAG_04462	1047.92	-0.774638	0.213262	-3.63233	0.000280874	0.00546371
CNAG_01234	4130.8	-0.773636	0.209544	-3.692	0.000222495	0.00483122
CNAG_05860	2036.16	-0.772259	0.229653	-3.36272	0.000771785	0.00940451
CNAG_12148	51.5118	-0.771853	0.4818	-1.60202	0.109151	0.239404
CNAG_02939	1823.45	-0.770652	0.192545	-4.00246	6.26872e-05	0.00237436
CNAG_07903	3196.93	-0.770379	0.192366	-4.00475	6.20823e-05	0.00237436
CNAG_12163	116.07	-0.769996	0.442236	-1.74114	0.0816586	0.196892
CNAG_12295	179.409	-0.769798	0.403483	-1.90788	0.0564068	0.151108
CNAG_06561	87.3318	-0.769152	0.227941	-3.37435	0.000739901	0.00920988
CNAG_04317	178.353	-0.769127	0.254479	-3.02236	0.00250809	0.0191888
CNAG_04959	859.494	-0.768806	0.238179	-3.22785	0.00124726	0.0124998
CNAG_05855	2269.2	-0.767925	0.267733	-2.86825	0.00412748	0.0258737
CNAG_04523	72.9703	-0.767626	0.315585	-2.43239	0.0149995	0.0603454
CNAG_01338	1960.04	-0.767442	0.258372	-2.9703	0.00297513	0.0212972
CNAG_04727	1561.47	-0.767377	0.299025	-2.56626	0.01028	0.0469113
CNAG_12051	462.839	-0.766513	0.223678	-3.42686	0.000610609	0.0081592
CNAG_07307	48.2948	-0.765582	0.450042	-1.70114	0.0889175	0.208604
CNAG_05292	14672.9	-0.764021	0.180223	-4.2393	2.24218e-05	0.00139104
CNAG_12654	78.6977	-0.763862	0.265426	-2.87787	0.00400372	0.0253829
CNAG_00180	1435.81	-0.763118	0.239947	-3.18036	0.00147093	0.0137211
CNAG_05060	1652.93	-0.763031	0.256556	-2.97413	0.00293821	0.0212015
CNAG_05015	527.318	-0.762348	0.186927	-4.07831	4.53645e-05	0.0020018
CNAG_02993	2929.52	-0.76059	0.18144	-4.19198	2.76536e-05	0.00153471
CNAG_12860	117.953	-0.760197	0.314734	-2.41536	0.0157197	0.0621866
CNAG_06376	2485.38	-0.758893	0.200448	-3.78598	0.000153101	0.00389834
CNAG_03754	110.859	-0.758608	0.263462	-2.87939	0.0039845	0.0253021
CNAG_06381	17392.6	-0.757491	0.124815	-6.06889	1.28796e-09	2.01359e-06
CNAG_03864	4088.05	-0.757441	0.207925	-3.64286	0.000269621	0.00532229
CNAG_06737	3522.52	-0.756796	0.233759	-3.2375	0.00120581	0.0122791
CNAG_03068	721.789	-0.756665	0.150607	-5.0241	5.05789e-07	0.000104046
CNAG_12790	37.0676	-0.756373	0.462768	-1.63445	0.102163	0.22942
CNAG_01521	1080.52	-0.755941	0.274499	-2.75389	0.00588911	0.0325948
CNAG_12767	150.825	-0.755871	0.275863	-2.74003	0.00614343	0.0332479
CNAG_02603	324.607	-0.75516	0.187647	-4.02436	5.71296e-05	0.00229177
CNAG_07940	324.075	-0.75444	0.30071	-2.50886	0.0121122	0.0523968
CNAG_01526	7271.54	-0.754194	0.180429	-4.18	2.91512e-05	0.00153969
CNAG_07691	685.641	-0.753595	0.225043	-3.34868	0.000811977	0.00963226
CNAG_01265	884.307	-0.752952	0.26698	-2.82026	0.00479847	0.0285897
CNAG_03728	516.366	-0.752485	0.392412	-1.91759	0.055163	0.148774
CNAG_00866	12679.7	-0.752023	0.20697	-3.63349	0.000279609	0.00546371
CNAG_03958	4199.15	-0.75097	0.318996	-2.35416	0.0185644	0.0698017
CNAG_12927	27.4032	-0.750679	0.39897	-1.88154	0.0598984	0.157919
CNAG_12343	86.4771	-0.750474	0.379904	-1.97543	0.0482192	0.134714
CNAG_01142	2877.02	-0.750449	0.197827	-3.79347	0.000148559	0.00381263
CNAG_05253	1422.22	-0.750288	0.289979	-2.58738	0.00967077	0.0449176
CNAG_00738	115.967	-0.749619	0.209749	-3.57388	0.00035173	0.00599013
CNAG_00920	2446.66	-0.747323	0.294588	-2.53684	0.0111857	0.0497091
CNAG_02682	2046.98	-0.74669	0.209923	-3.55698	0.000375148	0.00618678
CNAG_06922	2096.98	-0.746002	0.242547	-3.0757	0.00210012	0.0169394
CNAG_07845	172.353	-0.745648	0.252761	-2.95001	0.00317762	0.0221979
CNAG_00790	2603.96	-0.745642	0.260306	-2.86448	0.00417692	0.0259753
CNAG_02039	295.789	-0.745052	0.366545	-2.03263	0.0420896	0.121857
CNAG_13205	18.1517	-0.744575	0.423365	-1.75871	0.0786275	NA
CNAG_06880	2057.93	-0.742922	0.233787	-3.17778	0.00148408	0.0137555
CNAG_00766	3618.22	-0.739812	0.216259	-3.42095	0.000624027	0.00828187
CNAG_04325	473.182	-0.738908	0.236571	-3.12341	0.00178771	0.0154244
CNAG_12773	282.204	-0.738833	0.313715	-2.35511	0.0185171	0.0696575
CNAG_05096	2926.51	-0.737674	0.185338	-3.98014	6.88734e-05	0.00248103
CNAG_03828	1807.02	-0.736734	0.293719	-2.50829	0.0121316	0.0524395
CNAG_02413	3387.25	-0.736334	0.131713	-5.59045	2.26477e-08	1.54813e-05
CNAG_04202	1910.12	-0.734129	0.277542	-2.64511	0.0081664	0.0401995
CNAG_07841	2.68337	-0.733947	0.473313	-1.55066	0.120983	NA
CNAG_02325	1712.72	-0.732728	0.217855	-3.36338	0.000769948	0.00940419
CNAG_00285	3299.23	-0.732724	0.20971	-3.49398	0.00047588	0.00711272
CNAG_06021	6577.59	-0.732594	0.231887	-3.15927	0.00158167	0.0142136
CNAG_05768	4814.84	-0.730691	0.158139	-4.62055	3.82721e-06	0.000432389
CNAG_02933	1704.35	-0.730018	0.247016	-2.95535	0.00312318	0.0219254
CNAG_01912	11473.3	-0.728459	0.210394	-3.46236	0.000535461	0.00756907
CNAG_04611	5851.64	-0.72736	0.296259	-2.45515	0.0140826	0.0577868
CNAG_05286	742.71	-0.725974	0.242079	-2.99891	0.0027095	0.0201141
CNAG_04245	7495.37	-0.724548	0.152061	-4.76485	1.8899e-06	0.000268607
CNAG_12125	186.824	-0.724513	0.327129	-2.21476	0.0267763	0.0886909
CNAG_00710	1522.3	-0.723855	0.157961	-4.5825	4.59456e-06	0.000491995
CNAG_12908	87.4369	-0.7237	0.321061	-2.25409	0.0241907	0.0827926
CNAG_05654	3089.39	-0.722973	0.249842	-2.89372	0.00380707	0.0246765
CNAG_03024	5930.59	-0.722881	0.16751	-4.31546	1.59269e-05	0.00112163
CNAG_05299	976.001	-0.722083	0.30134	-2.39624	0.0165641	0.0644567
CNAG_02096	405.008	-0.721789	0.204133	-3.53588	0.00040642	0.00648364
CNAG_13125	89.2293	-0.721121	0.310317	-2.32382	0.020135	0.0737906
CNAG_02102	363.726	-0.720921	0.241646	-2.98338	0.00285087	0.0207112
CNAG_02201	1881.54	-0.720422	0.232432	-3.09949	0.00193853	0.0162265
CNAG_02182	18516.2	-0.720084	0.238256	-3.02231	0.00250855	0.0191888
CNAG_12983	6.67258	-0.719519	0.483808	-1.4872	0.136962	NA
CNAG_00237	3961.86	-0.71729	0.133159	-5.38673	7.17505e-08	3.50546e-05
CNAG_03054	524.232	-0.716667	0.204041	-3.51237	0.000444126	0.00687472
CNAG_02662	2976.87	-0.716648	0.160941	-4.45287	8.47294e-06	0.000735922
CNAG_12797	66.7869	-0.715934	0.330933	-2.16338	0.0305118	0.0975106
CNAG_02737	4.5868	-0.715548	0.481432	-1.48629	0.137202	NA
CNAG_02601	94.1212	-0.714761	0.311607	-2.29379	0.0218023	0.0775381
CNAG_01987	3178.69	-0.713633	0.239025	-2.9856	0.00283018	0.020621
CNAG_05671	2149.7	-0.712061	0.245481	-2.90068	0.00372357	0.0244056
CNAG_01954	313.707	-0.711055	0.187458	-3.79313	0.00014876	0.00381263
CNAG_03155	1702.77	-0.710815	0.163126	-4.35746	1.31581e-05	0.0010084
CNAG_03782	806.669	-0.71052	0.273251	-2.60025	0.00931568	0.0435791
CNAG_07876	286.967	-0.709723	0.315137	-2.25211	0.0243154	0.0831164
CNAG_02216	5787.83	-0.709479	0.196081	-3.61829	0.000296554	0.00559592
CNAG_00337	6423.44	-0.708543	0.271641	-2.60838	0.00909712	0.0430722
CNAG_01184	3841.72	-0.708315	0.218516	-3.24148	0.0011891	0.0121824
CNAG_02996	2701.27	-0.707887	0.234702	-3.01611	0.00256037	0.0194882
CNAG_06962	971.116	-0.707774	0.198901	-3.55843	0.000373084	0.00616575
CNAG_12601	56.0616	-0.706174	0.484435	-1.45773	0.144916	0.29024
CNAG_05005	4188.31	-0.706116	0.216662	-3.25907	0.00111776	0.0117273
CNAG_05229	3684.06	-0.705967	0.188388	-3.7474	0.000178676	0.00420696
CNAG_00396	2698.25	-0.705887	0.191399	-3.68803	0.000225993	0.0048731
CNAG_06065	2749.42	-0.705851	0.20367	-3.46567	0.000528919	0.00753107
CNAG_07771	4385.87	-0.705755	0.176371	-4.00154	6.29303e-05	0.00237436
CNAG_12175	825.671	-0.704911	0.324632	-2.17141	0.0299001	0.0961453
CNAG_03967	2918.91	-0.704097	0.174831	-4.02731	5.64189e-05	0.00229177
CNAG_03348	2843.59	-0.703227	0.156609	-4.49034	7.11099e-06	0.000661745
CNAG_01047	8434.72	-0.702434	0.2549	-2.75572	0.00585633	0.0325341
CNAG_02264	4313.8	-0.700225	0.191534	-3.65589	0.000256296	0.00518632
CNAG_00087	2731.14	-0.698514	0.185433	-3.76694	0.000165259	0.00405609
CNAG_07619	2633.88	-0.697457	0.25338	-2.75261	0.00591217	0.032638
CNAG_00470	667.668	-0.697453	0.171294	-4.07167	4.66779e-05	0.00203844
CNAG_04167	1197.51	-0.697223	0.313193	-2.22618	0.0260022	0.0870115
CNAG_01519	1373.44	-0.696732	0.194004	-3.59133	0.000328997	0.0057686
CNAG_05965	905.771	-0.696184	0.195815	-3.55532	0.000377515	0.00619965
CNAG_07683	210.138	-0.69615	0.272323	-2.55633	0.0105782	0.0478527
CNAG_12199	258.346	-0.695668	0.296349	-2.34746	0.0189019	0.0706583
CNAG_03838	443.975	-0.695434	0.316419	-2.19783	0.0279615	0.0914157
CNAG_04999	463.176	-0.694199	0.195426	-3.55223	0.000381982	0.00622152
CNAG_03631	2994.85	-0.693788	0.175212	-3.95972	7.50382e-05	0.00255301
CNAG_06107	1726.22	-0.693621	0.220645	-3.14361	0.00166879	0.0146802
CNAG_12675	555.318	-0.693408	0.269567	-2.57231	0.0101023	0.0463711
CNAG_03454	1849.02	-0.693119	0.306288	-2.26297	0.0236377	0.0816507
CNAG_05449	10662.4	-0.692203	0.238578	-2.90137	0.00371536	0.0243854
CNAG_05645	2820.46	-0.692137	0.223144	-3.10175	0.00192381	0.016153
CNAG_12433	61.1086	-0.691303	0.304859	-2.26761	0.0233528	0.080892
CNAG_03128	2587.3	-0.69085	0.201563	-3.42746	0.000609265	0.00815518
CNAG_03765	22855.5	-0.690703	0.225346	-3.06508	0.00217615	0.0173759
CNAG_04185	1663.28	-0.688972	0.216001	-3.18967	0.00142435	0.0135288
CNAG_02987	14.5871	-0.688947	0.482217	-1.42871	0.153088	NA
CNAG_01988	6061.71	-0.688192	0.146233	-4.70612	2.52481e-06	0.000328941
CNAG_02942	7276.63	-0.687863	0.322137	-2.13531	0.0327355	0.102342
CNAG_12576	4.09338	-0.687314	0.485505	-1.41567	0.156872	NA
CNAG_12673	189.623	-0.686924	0.273754	-2.50927	0.012098	0.0523968
CNAG_03697	1530.18	-0.686153	0.196948	-3.48394	0.000494095	0.00724641
CNAG_06285	1780.28	-0.686013	0.213745	-3.20949	0.00132969	0.013009
CNAG_07881	121.176	-0.683113	0.246246	-2.77411	0.00553533	0.0312868
CNAG_03517	15163.5	-0.68242	0.157941	-4.32072	1.55518e-05	0.00112163
CNAG_12472	326.69	-0.681291	0.301769	-2.25766	0.0239669	0.0824799
CNAG_06282	2823.9	-0.680525	0.147359	-4.61814	3.87198e-06	0.000432389
CNAG_02397	655.811	-0.679924	0.182146	-3.73284	0.000189332	0.00439171
CNAG_05718	620.587	-0.679292	0.18989	-3.5773	0.000347161	0.00592523
CNAG_03937	2115.67	-0.678601	0.233187	-2.91011	0.00361303	0.0238943
CNAG_04256	1380.81	-0.677571	0.291326	-2.32582	0.0200283	0.0735719
CNAG_07641	343.349	-0.677487	0.232571	-2.91303	0.00357937	0.0237392
CNAG_02124	1461.35	-0.677151	0.201646	-3.35811	0.000784767	0.00943624
CNAG_02210	1359.97	-0.675834	0.242652	-2.7852	0.00534942	0.0307926
CNAG_03688	6896.33	-0.674309	0.208418	-3.23537	0.00121487	0.0123272
CNAG_01604	1786.28	-0.67396	0.286491	-2.35247	0.0186494	0.0700203
CNAG_03987	5896.44	-0.673794	0.226636	-2.97302	0.00294887	0.0212015
CNAG_07972	3202.15	-0.672619	0.256929	-2.61791	0.00884694	0.0424273
CNAG_12735	42.2926	-0.671069	0.289628	-2.317	0.0205037	0.0744797
CNAG_12448	133.912	-0.670283	0.280482	-2.38976	0.0168595	0.0653078
CNAG_00074	6216.63	-0.670277	0.196509	-3.41091	0.000647454	0.00844967
CNAG_01860	1348.3	-0.669004	0.160225	-4.1754	2.97458e-05	0.00153989
CNAG_02934	4562.25	-0.668904	0.203483	-3.28728	0.00101162	0.0109831
CNAG_05807	1445.29	-0.668245	0.259824	-2.57192	0.0101137	0.0463962
CNAG_02004	7347.2	-0.66823	0.250018	-2.67273	0.00752375	0.0379822
CNAG_00328	2937.61	-0.667456	0.20272	-3.29251	0.000992991	0.0108867
CNAG_02696	3853.51	-0.666424	0.185809	-3.5866	0.000335019	0.00578366
CNAG_12196	62.861	-0.665583	0.408228	-1.63042	0.103013	0.230639
CNAG_04753	3024.71	-0.664958	0.184957	-3.5952	0.000324137	0.00573253
CNAG_01137	12697.8	-0.664782	0.202493	-3.28298	0.00102715	0.0110619
CNAG_07718	9487.61	-0.663139	0.158813	-4.17559	2.97212e-05	0.00153989
CNAG_04310	1048.74	-0.662648	0.157936	-4.19569	2.72045e-05	0.00153471
CNAG_07600	2224.39	-0.662085	0.231978	-2.85408	0.00431613	0.0264829
CNAG_00981	851.356	-0.661658	0.297754	-2.22217	0.026272	0.0874981
CNAG_03446	1497.66	-0.660466	0.237932	-2.77586	0.00550563	0.0312092
CNAG_00717	3128.67	-0.659262	0.223178	-2.95397	0.00313713	0.021974
CNAG_12402	268.587	-0.6588	0.284436	-2.31616	0.0205493	0.0746094
CNAG_07316	1508.89	-0.658771	0.126993	-5.18747	2.13168e-07	5.77826e-05
CNAG_03759	2970.61	-0.658763	0.453197	-1.45359	0.14606	0.292157
CNAG_12839	38.4508	-0.65775	0.464769	-1.41522	0.157005	0.307827
CNAG_03345	20259.2	-0.655165	0.162308	-4.03655	5.42439e-05	0.00224352
CNAG_04151	7134.65	-0.655102	0.179917	-3.64113	0.000271444	0.00534478
CNAG_04359	2661.4	-0.654856	0.182305	-3.59209	0.000328032	0.0057686
CNAG_06600	6394.24	-0.654691	0.157761	-4.1499	3.32615e-05	0.00167745
CNAG_04084	13.3737	-0.654418	0.446327	-1.46623	0.142586	NA
CNAG_01384	1566.4	-0.652002	0.145289	-4.48762	7.20242e-06	0.000662368
CNAG_02814	13855	-0.651795	0.159864	-4.07719	4.55826e-05	0.0020018
CNAG_06966	328.455	-0.650494	0.233878	-2.78134	0.00541356	0.0310703
CNAG_05760	60.977	-0.649897	0.350825	-1.85248	0.0639571	0.164946
CNAG_13010	544.697	-0.648747	0.309354	-2.0971	0.0359846	0.109157
CNAG_07677	953.334	-0.646326	0.278421	-2.3214	0.0202652	0.0740488
CNAG_07693	282.318	-0.643699	0.328878	-1.95725	0.0503175	0.138888
CNAG_12251	27.3953	-0.642262	0.47516	-1.35167	0.176479	0.332259
CNAG_04688	1228.59	-0.641947	0.216685	-2.96258	0.00305068	0.0215617
CNAG_02283	1224.58	-0.641544	0.202281	-3.17155	0.0015163	0.0139119
CNAG_04614	1055.88	-0.639331	0.187051	-3.41796	0.000630932	0.00834517
CNAG_03837	1423.63	-0.638296	0.321795	-1.98355	0.0473065	0.132829
CNAG_07995	4816.72	-0.637967	0.161098	-3.96011	7.49137e-05	0.00255301
CNAG_06085	6282.68	-0.637882	0.220693	-2.89035	0.00384808	0.0248635
CNAG_04621	9124.27	-0.637593	0.146944	-4.33902	1.43118e-05	0.00106548
CNAG_05622	1936.75	-0.637386	0.200755	-3.17494	0.00149868	0.0138314
CNAG_06220	73761.7	-0.63631	0.182929	-3.47846	0.000504309	0.00735482
CNAG_04401	4165.71	-0.636288	0.220429	-2.88658	0.00389453	0.0249397
CNAG_02314	556.325	-0.635612	0.282377	-2.25093	0.02439	0.0832925
CNAG_06452	2275.81	-0.635391	0.205316	-3.0947	0.00197014	0.0162969
CNAG_03381	1120.26	-0.635118	0.203567	-3.11995	0.00180883	0.0155269
CNAG_06905	6246.54	-0.633559	0.209336	-3.02652	0.00247385	0.0190523
CNAG_03083	555.342	-0.632945	0.192475	-3.28845	0.00100739	0.0109676
CNAG_04107	641.566	-0.631229	0.329219	-1.91735	0.0551931	0.148774
CNAG_06504	53.6818	-0.631214	0.359088	-1.75782	0.0787775	0.191899
CNAG_04371	1683	-0.631141	0.152775	-4.13118	3.60908e-05	0.00177435
CNAG_05981	470.595	-0.63108	0.215246	-2.9319	0.00336896	0.0229201
CNAG_02188	2861.16	-0.630199	0.18565	-3.39455	0.000687423	0.00881413
CNAG_04387	1422.2	-0.629638	0.217144	-2.89963	0.00373605	0.0244132
CNAG_03516	13266.9	-0.628809	0.174004	-3.61377	0.000301775	0.00560664
CNAG_04552	70.2705	-0.628466	0.347416	-1.80897	0.0704553	0.177661
CNAG_01621	33061.1	-0.627904	0.289916	-2.16581	0.0303256	0.0971935
CNAG_07741	2403.64	-0.627287	0.148303	-4.22977	2.33931e-05	0.00141755
CNAG_13203	1343.68	-0.62726	0.160508	-3.90798	9.30711e-05	0.00295747
CNAG_02998	2371.31	-0.627181	0.117113	-5.35534	8.53961e-08	3.5481e-05
CNAG_06671	3832.28	-0.626685	0.195089	-3.21231	0.00131672	0.0129542
CNAG_05862	1560.31	-0.626547	0.245875	-2.54824	0.0108269	0.0486683
CNAG_12306	121.811	-0.626289	0.257587	-2.43136	0.0150421	0.0604233
CNAG_02139	6635.13	-0.626168	0.182263	-3.43552	0.000591412	0.00804893
CNAG_02038	4085.81	-0.6259	0.161435	-3.8771	0.000105707	0.00313944
CNAG_07436	66.7199	-0.625419	0.357989	-1.74703	0.0806319	0.195079
CNAG_00301	9682.42	-0.624717	0.302569	-2.06471	0.0389503	0.115682
CNAG_05139	3461.3	-0.624071	0.123795	-5.04116	4.62728e-07	9.77606e-05
CNAG_06498	4919.37	-0.623114	0.222563	-2.79972	0.00511466	0.0299935
CNAG_00689	1814.16	-0.6218	0.161884	-3.84102	0.000122524	0.00338434
CNAG_05903	3043.47	-0.621426	0.178449	-3.48237	0.000496993	0.00727527
CNAG_12452	132.574	-0.621266	0.314931	-1.9727	0.0485292	0.135338
CNAG_04879	13965.5	-0.621033	0.151764	-4.09209	4.27512e-05	0.00195409
CNAG_06529	334.103	-0.620767	0.141343	-4.39191	1.1236e-05	0.000905486
CNAG_02549	2182.67	-0.620716	0.244422	-2.53952	0.0111004	0.0494555
CNAG_01479	618.411	-0.620511	0.21074	-2.94443	0.00323548	0.0223031
CNAG_00465	5966.57	-0.620034	0.264622	-2.3431	0.0191244	0.0712527
CNAG_12894	37.1071	-0.619647	0.287523	-2.15512	0.0311525	0.0989914
CNAG_05882	3387.01	-0.619319	0.155066	-3.99391	6.49925e-05	0.0024078
CNAG_02116	995.52	-0.618886	0.235855	-2.62401	0.0086902	0.0419847
CNAG_01711	6242.84	-0.618448	0.162757	-3.79983	0.000144797	0.00376038
CNAG_03282	2354.04	-0.617725	0.24044	-2.56914	0.010195	0.0466321
CNAG_01112	8262.7	-0.616961	0.220477	-2.79831	0.00513712	0.03008
CNAG_05842	782.62	-0.615805	0.153157	-4.02075	5.80135e-05	0.00229177
CNAG_02994	14098	-0.614233	0.125042	-4.91221	9.00576e-07	0.00014585
CNAG_00696	5624.04	-0.613715	0.217663	-2.81956	0.00480897	0.0286304
CNAG_01095	2431.27	-0.612351	0.196127	-3.12221	0.00179498	0.015452
CNAG_03976	1377.11	-0.611305	0.144323	-4.23566	2.27878e-05	0.00140262
CNAG_01029	2505.17	-0.611226	0.177303	-3.44736	0.000566101	0.00783223
CNAG_04792	4343.84	-0.610623	0.166613	-3.66493	0.000247407	0.00508943
CNAG_04183	14310.1	-0.610007	0.116821	-5.2217	1.77284e-07	5.70217e-05
CNAG_00098	2246.19	-0.609751	0.233401	-2.61246	0.00898941	0.042697
CNAG_02167	1939.68	-0.609614	0.136765	-4.45738	8.29662e-06	0.000735922
CNAG_13173	111.463	-0.609509	0.405605	-1.50272	0.132912	0.274207
CNAG_05990	1264.66	-0.609294	0.123092	-4.94992	7.42431e-07	0.000134967
CNAG_00400	4079.17	-0.60888	0.234138	-2.60052	0.00930819	0.0435791
CNAG_00267	738.394	-0.607702	0.16331	-3.72115	0.000198314	0.00449869
CNAG_12487	247.474	-0.607409	0.397416	-1.5284	0.126414	0.26507
CNAG_04268	2281.75	-0.606833	0.198039	-3.06421	0.00218248	0.0174086
CNAG_02056	518.773	-0.605902	0.185438	-3.26741	0.00108538	0.0115434
CNAG_01529	1248.93	-0.605146	0.204054	-2.96562	0.00302078	0.0214603
CNAG_02043	231.151	-0.60472	0.234193	-2.58214	0.00981899	0.0454599
CNAG_02503	2026.07	-0.604392	0.245301	-2.46388	0.0137443	0.0571181
CNAG_07934	10.9145	-0.603819	0.407926	-1.48022	0.138815	NA
CNAG_01239	3590.16	-0.602936	0.197438	-3.0538	0.00225966	0.0178368
CNAG_01074	213.199	-0.602665	0.272781	-2.20934	0.0271511	0.0896663
CNAG_07708	324.521	-0.602547	0.204659	-2.94416	0.00323837	0.0223034
CNAG_01348	9222.88	-0.602313	0.215605	-2.79359	0.00521267	0.0303225
CNAG_01424	2963.63	-0.602114	0.141725	-4.24846	2.15244e-05	0.00135691
CNAG_07991	903.429	-0.601494	0.291483	-2.06356	0.0390594	0.11583
CNAG_01478	1594.27	-0.601146	0.18265	-3.29125	0.000997431	0.0109201
CNAG_02221	1197.85	-0.600385	0.167235	-3.59006	0.000330604	0.0057686
CNAG_12990	18.9158	-0.599764	0.424033	-1.41443	0.157237	NA
CNAG_04551	25.3601	-0.59969	0.371903	-1.61249	0.106856	0.235997
CNAG_00287	4421.81	-0.598941	0.124539	-4.80925	1.51497e-06	0.000227741
CNAG_03307	85.5423	-0.597849	0.31988	-1.86898	0.0616257	0.160898
CNAG_07825	2211.26	-0.597478	0.136854	-4.36579	1.26663e-05	0.000980322
CNAG_05916	707.153	-0.597011	0.367774	-1.62331	0.104523	0.232449
CNAG_07862	2019.16	-0.595874	0.193162	-3.08484	0.00203658	0.0166179
CNAG_04033	5389.53	-0.595249	0.166714	-3.57048	0.000356332	0.00600702
CNAG_01671	654.989	-0.595215	0.182207	-3.2667	0.00108808	0.0115564
CNAG_01727	53058.4	-0.59491	0.13763	-4.32252	1.54257e-05	0.00112163
CNAG_06892	2270.62	-0.593992	0.174506	-3.40385	0.00066443	0.00858484
CNAG_03935	11533	-0.593435	0.16346	-3.63045	0.000282928	0.00546371
CNAG_01732	5051.81	-0.593281	0.147843	-4.01291	5.99747e-05	0.0023209
CNAG_05031	7083.96	-0.592247	0.187564	-3.15758	0.00159087	0.0142286
CNAG_02593	2569.24	-0.591401	0.181155	-3.26461	0.00109614	0.0115791
CNAG_02590	1122.85	-0.590096	0.202235	-2.91788	0.00352425	0.0236288
CNAG_04771	3063.71	-0.589461	0.219418	-2.68647	0.0072211	0.0372344
CNAG_01081	2272.19	-0.589032	0.255965	-2.30122	0.0213791	0.0766256
CNAG_13200	1351.77	-0.587841	0.440157	-1.33553	0.181704	0.338993
CNAG_04704	53.8878	-0.587495	0.430746	-1.3639	0.172599	0.328194
CNAG_06423	1166.71	-0.587428	0.192908	-3.04512	0.00232589	0.0181271
CNAG_06759	5591.35	-0.587323	0.202556	-2.89956	0.00373683	0.0244132
CNAG_03226	4717.82	-0.587243	0.17426	-3.36992	0.000751888	0.00928171
CNAG_06139	443.452	-0.586499	0.173992	-3.37085	0.000749372	0.00928171
CNAG_03179	78.8136	-0.586419	0.473359	-1.23885	0.215403	0.379834
CNAG_07877	72.833	-0.586395	0.354022	-1.65638	0.0976445	0.222858
CNAG_01485	4972.96	-0.585981	0.15293	-3.83169	0.000127266	0.00346634
CNAG_00539	3222.42	-0.585166	0.215933	-2.70995	0.00672938	0.0357186
CNAG_03026	1646.56	-0.583983	0.201333	-2.90058	0.00372469	0.0244056
CNAG_05181	5175.57	-0.583645	0.172375	-3.3859	0.000709462	0.00896589
CNAG_03769	18461.7	-0.583352	0.176068	-3.31321	0.000922312	0.0103439
CNAG_03792	1991.22	-0.582831	0.173716	-3.35508	0.000793406	0.00948327
CNAG_12622	357.44	-0.582742	0.192815	-3.02228	0.00250876	0.0191888
CNAG_06289	2881.08	-0.582689	0.157333	-3.70354	0.000212612	0.00469599
CNAG_13106	172.221	-0.581204	0.269205	-2.15896	0.030853	0.0983046
CNAG_06244	2140.46	-0.580949	0.259988	-2.23453	0.0254485	0.0857462
CNAG_12837	10.5888	-0.578371	0.436438	-1.32521	0.185102	NA
CNAG_12103	238.267	-0.578325	0.339493	-1.7035	0.0884754	0.207743
CNAG_07794	5369.88	-0.577733	0.1425	-4.05426	5.02934e-05	0.0021205
CNAG_04738	6936.21	-0.577685	0.18177	-3.17811	0.00148236	0.0137555
CNAG_06565	1358.58	-0.577345	0.279951	-2.06231	0.0391786	0.116082
CNAG_02967	3920.98	-0.576157	0.23188	-2.48472	0.0129655	0.0547277
CNAG_13195	17.0861	-0.575234	0.469399	-1.22547	0.220399	NA
CNAG_12801	2026.93	-0.574876	0.419959	-1.36889	0.171035	0.326665
CNAG_00269	156.75	-0.574556	0.25658	-2.23929	0.0251372	0.0849536
CNAG_06354	1366.66	-0.574221	0.193547	-2.96684	0.00300882	0.0214012
CNAG_03019	3071.04	-0.573117	0.0928961	-6.16944	6.85328e-10	1.78574e-06
CNAG_02576	1495.19	-0.573065	0.220139	-2.6032	0.00923591	0.0435184
CNAG_12952	14.4191	-0.572875	0.468774	-1.22207	0.221681	NA
CNAG_02501	1921.32	-0.572406	0.137742	-4.15564	3.24384e-05	0.00165733
CNAG_12435	29.2533	-0.572013	0.347285	-1.6471	0.0995375	0.225401
CNAG_07026	304.067	-0.571989	0.30641	-1.86675	0.0619372	0.161495
CNAG_04748	1701.71	-0.571713	0.213933	-2.67239	0.00753133	0.0379822
CNAG_07688	1957.59	-0.571561	0.136564	-4.18531	2.84779e-05	0.00153525
CNAG_12007	9.06924	-0.571454	0.472509	-1.2094	0.226508	NA
CNAG_05195	5661.71	-0.570616	0.130298	-4.37931	1.19056e-05	0.000949653
CNAG_01044	4673.57	-0.569363	0.167904	-3.39099	0.000696394	0.0088694
CNAG_07498	2391.76	-0.56903	0.229891	-2.47521	0.0133156	0.0558374
CNAG_03598	4570.26	-0.56902	0.169045	-3.36609	0.000762408	0.00935595
CNAG_02349	1055.47	-0.568387	0.255431	-2.22521	0.0260673	0.0870431
CNAG_06453	36530.8	-0.567538	0.213872	-2.65363	0.00796303	0.0394187
CNAG_03058	46530	-0.567477	0.222947	-2.54534	0.0109171	0.0488769
CNAG_03555	3327.05	-0.566636	0.253886	-2.23185	0.0256248	0.0860805
CNAG_04478	10476.2	-0.56574	0.173231	-3.26581	0.00109153	0.0115748
CNAG_03900	2177.08	-0.565028	0.217275	-2.60053	0.00930806	0.0435791
CNAG_02683	3425.68	-0.5648	0.114266	-4.94287	7.69807e-07	0.000136763
CNAG_02179	4708.25	-0.564408	0.204813	-2.75572	0.00585637	0.0325341
CNAG_05422	1929.32	-0.562805	0.114141	-4.9308	8.1892e-07	0.000139143
CNAG_07819	129.33	-0.562402	0.259498	-2.16727	0.0302145	0.0969171
CNAG_12875	106.955	-0.561827	0.284535	-1.97454	0.0483199	0.134947
CNAG_00275	1766.98	-0.561601	0.200745	-2.79758	0.00514866	0.0301025
CNAG_12418	260.867	-0.560929	0.420227	-1.33482	0.181934	0.339261
CNAG_06632	8687.14	-0.56061	0.208555	-2.68807	0.00718654	0.0371297
CNAG_12056	158.886	-0.560551	0.399578	-1.40286	0.160659	0.312562
CNAG_03833	402.993	-0.560207	0.289999	-1.93176	0.0533897	0.145324
CNAG_03110	10473.2	-0.558639	0.213286	-2.6192	0.00881374	0.0423165
CNAG_00414	581.668	-0.557911	0.25072	-2.22523	0.0260656	0.0870431
CNAG_07832	10.7324	-0.557234	0.419281	-1.32902	0.18384	NA
CNAG_00686	30774.3	-0.557014	0.197275	-2.82354	0.00474969	0.0283639
CNAG_01561	4281.17	-0.556557	0.148262	-3.75388	0.000174116	0.00412443
CNAG_00185	2437.94	-0.55601	0.210464	-2.64183	0.00824586	0.0405207
CNAG_12040	78.7868	-0.554995	0.269206	-2.0616	0.039246	0.116163
CNAG_03983	12085.3	-0.554775	0.135422	-4.09665	4.1917e-05	0.00195409
CNAG_06036	6325.2	-0.554505	0.163779	-3.3857	0.000709977	0.00896589
CNAG_05138	17834.3	-0.554204	0.197277	-2.80927	0.00496534	0.0292936
CNAG_12804	14.0869	-0.554144	0.471814	-1.1745	0.240196	NA
CNAG_06026	6077.49	-0.552767	0.138963	-3.97781	6.95526e-05	0.002494
CNAG_04220	2875.08	-0.552307	0.125107	-4.41467	1.01164e-05	0.000834349
CNAG_04405	1613.4	-0.552026	0.156768	-3.5213	0.000429433	0.00674072
CNAG_05544	1781.4	-0.551791	0.245243	-2.24997	0.0244507	0.0833588
CNAG_00148	8645.36	-0.551762	0.17826	-3.09526	0.00196639	0.0162871
CNAG_12590	87.9899	-0.551642	0.416658	-1.32397	0.185513	0.343802
CNAG_01893	9224.33	-0.551634	0.209674	-2.63091	0.00851562	0.0413333
CNAG_06249	982.027	-0.551559	0.159069	-3.46743	0.00052546	0.00750918
CNAG_02373	2703.4	-0.551494	0.152205	-3.62336	0.000290806	0.00554063
CNAG_05131	663.639	-0.551462	0.167135	-3.2995	0.000968581	0.0106639
CNAG_12593	170.669	-0.550046	0.237022	-2.32065	0.0203056	0.0740488
CNAG_07541	2904.72	-0.5498	0.17446	-3.15143	0.00162472	0.0144652
CNAG_01086	466.208	-0.5492	0.180235	-3.04713	0.00231034	0.0180772
CNAG_00044	3441.92	-0.548828	0.160904	-3.4109	0.00064748	0.00844967
CNAG_02170	390.387	-0.548578	0.206674	-2.65431	0.00794701	0.0394074
CNAG_03543	4226.01	-0.547521	0.16474	-3.32354	0.000888829	0.0101579
CNAG_04610	378.605	-0.547205	0.355296	-1.54014	0.123526	0.261115
CNAG_03382	6446.26	-0.546818	0.182917	-2.98943	0.00279503	0.0205152
CNAG_04651	4918.88	-0.5465	0.147844	-3.69647	0.000218621	0.00476033
CNAG_04322	23486.3	-0.546081	0.27464	-1.98836	0.0467723	0.131707
CNAG_00264	10378	-0.545906	0.22655	-2.40965	0.0159679	0.0628244
CNAG_06428	1686.03	-0.545721	0.122506	-4.45463	8.40364e-06	0.000735922
CNAG_00154	3519.59	-0.54512	0.196204	-2.77833	0.00546395	0.0311906
CNAG_00984	53977.5	-0.542949	0.239213	-2.26973	0.0232238	0.0806489
CNAG_03452	1245.99	-0.542404	0.16302	-3.32722	0.000877181	0.0101308
CNAG_02789	5483.17	-0.542273	0.161879	-3.34987	0.000808498	0.00961952
CNAG_02031	19.1442	-0.542179	0.440531	-1.23074	0.218421	NA
CNAG_04443	11244.7	-0.541435	0.234532	-2.30857	0.0209672	0.0755992
CNAG_06625	5249.44	-0.540461	0.14931	-3.61973	0.000294914	0.00558194
CNAG_00136	12872.9	-0.540441	0.147518	-3.66357	0.000248725	0.00509523
CNAG_00521	4321.63	-0.539951	0.175464	-3.07728	0.00208898	0.0168694
CNAG_10067	1.03586	-0.539847	0.313417	-1.72245	0.0849874	NA
CNAG_01375	5540.7	-0.539791	0.133817	-4.03379	5.48853e-05	0.0022581
CNAG_06602	9377.79	-0.539433	0.21463	-2.51331	0.0119604	0.0520279
CNAG_07328	1584.77	-0.539404	0.15849	-3.4034	0.000665526	0.00858484
CNAG_06399	3453.85	-0.539191	0.15999	-3.37015	0.00075128	0.00928171
CNAG_04039	10664.1	-0.538667	0.233351	-2.3084	0.0209767	0.0755992
CNAG_04690	866.98	-0.538	0.219605	-2.44985	0.0142917	0.0583227
CNAG_05173	3472.1	-0.537772	0.203124	-2.64751	0.00810869	0.0400162
CNAG_06515	1219.5	-0.53719	0.127401	-4.21653	2.48095e-05	0.00144728
CNAG_00524	3054.17	-0.536286	0.194136	-2.76243	0.00573731	0.0321495
CNAG_00253	2079.47	-0.534894	0.130202	-4.10818	3.98782e-05	0.00191244
CNAG_00308	2179.4	-0.534762	0.150459	-3.5542	0.000379127	0.00620008
CNAG_04816	1711.71	-0.533224	0.226728	-2.35182	0.0186818	0.0701082
CNAG_04634	7726.12	-0.532728	0.194456	-2.73958	0.00615169	0.0332557
CNAG_12252	75.5908	-0.532636	0.400942	-1.32846	0.184026	0.341856
CNAG_04080	2572.1	-0.531601	0.188824	-2.81532	0.00487291	0.0288999
CNAG_00100	6906.25	-0.531293	0.120361	-4.41417	1.01398e-05	0.000834349
CNAG_00027	1610.2	-0.531018	0.191088	-2.77891	0.00545409	0.0311906
CNAG_00409	1384.98	-0.530968	0.151565	-3.50324	0.000459636	0.00701752
CNAG_03234	754.506	-0.530896	0.198423	-2.67558	0.00745998	0.0377441
CNAG_02013	680.185	-0.529899	0.250757	-2.11319	0.0345843	0.106519
CNAG_01007	1445.8	-0.529792	0.268595	-1.97245	0.0485577	0.135369
CNAG_10088	7.07422	-0.529664	0.485411	-1.09117	0.2752	NA
CNAG_02147	670.19	-0.529451	0.131427	-4.02849	5.61355e-05	0.00229177
CNAG_02584	845.912	-0.52941	0.286183	-1.8499	0.0643276	0.165847
CNAG_06835	7910.46	-0.529377	0.319689	-1.65591	0.0977391	0.222878
CNAG_04274	175.422	-0.528065	0.257407	-2.05148	0.0402205	0.118108
CNAG_01082	5585.25	-0.52792	0.167966	-3.14301	0.0016722	0.0146802
CNAG_05739	2276.9	-0.527028	0.150518	-3.50144	0.000462748	0.00704192
CNAG_00424	2761.53	-0.526871	0.155864	-3.38033	0.00072399	0.00909877
CNAG_00663	3926.24	-0.526359	0.213226	-2.46855	0.0135661	0.0564975
CNAG_01722	17220.1	-0.526043	0.161501	-3.2572	0.00112517	0.011743
CNAG_05072	123.173	-0.52604	0.20536	-2.56154	0.0104208	0.0473199
CNAG_00932	4466.53	-0.525664	0.227566	-2.30994	0.0208916	0.0754318
CNAG_00596	729.371	-0.525431	0.167685	-3.13343	0.00172776	0.0150066
CNAG_07395	8.73147	-0.525152	0.45764	-1.14752	0.251166	NA
CNAG_12133	32.4539	-0.524801	0.354547	-1.4802	0.138819	0.282371
CNAG_00075	1927.74	-0.523941	0.189415	-2.7661	0.00567316	0.0318585
CNAG_03463	8431.9	-0.523931	0.147088	-3.56202	0.000368015	0.00610532
CNAG_02722	15233.5	-0.523791	0.12341	-4.2443	2.19276e-05	0.00137126
CNAG_05300	2620.23	-0.52333	0.195429	-2.67785	0.00740958	0.0376244
CNAG_01609	3677.93	-0.523123	0.127197	-4.11271	3.91045e-05	0.0019105
CNAG_00393	9443.86	-0.522893	0.0707004	-7.39589	1.40463e-13	5.48999e-10
CNAG_07585	6.45356	-0.52282	0.468766	-1.11531	0.264717	NA
CNAG_03154	4137.58	-0.522676	0.27908	-1.87285	0.0610885	0.160137
CNAG_01777	5079.09	-0.522527	0.170155	-3.07089	0.0021342	0.0171284
CNAG_00488	1132.5	-0.522456	0.177342	-2.94605	0.00321864	0.0222853
CNAG_13037	34.0947	-0.521097	0.386312	-1.3489	0.177369	0.333692
CNAG_07703	777.667	-0.520819	0.167482	-3.10971	0.00187273	0.0158604
CNAG_03355	15057	-0.520319	0.187424	-2.77616	0.00550054	0.0312092
CNAG_04447	1579.77	-0.519216	0.137541	-3.775	0.000160008	0.003994
CNAG_03824	12345.8	-0.518872	0.208654	-2.48676	0.0128914	0.0545302
CNAG_03321	5184.21	-0.51856	0.188987	-2.7439	0.00607144	0.0330735
CNAG_01026	2923.9	-0.518129	0.191421	-2.70675	0.0067945	0.0359598
CNAG_02473	10620.6	-0.516597	0.20363	-2.53694	0.0111825	0.0497091
CNAG_12546	56.057	-0.515845	0.380266	-1.35654	0.174928	0.33054
CNAG_02524	1334.36	-0.515753	0.143828	-3.58591	0.000335906	0.00578366
CNAG_07827	28.8986	-0.51534	0.474434	-1.08622	0.277381	0.451539
CNAG_02680	2859.11	-0.515287	0.142839	-3.60746	0.000309212	0.00564611
CNAG_01242	7202.75	-0.514878	0.151007	-3.40963	0.000650501	0.00845442
CNAG_12463	48.1744	-0.513884	0.326165	-1.57553	0.115134	0.248207
CNAG_13176	56.8086	-0.512261	0.318788	-1.6069	0.108076	0.237779
CNAG_12380	9.66566	-0.512235	0.479369	-1.06856	0.285268	NA
CNAG_12771	136.279	-0.511566	0.365656	-1.39904	0.161802	0.314004
CNAG_07538	18000	-0.511555	0.137128	-3.7305	0.000191104	0.00439615
CNAG_00073	8001.66	-0.511237	0.14197	-3.60102	0.000316967	0.00566987
CNAG_12628	526.973	-0.511023	0.229611	-2.2256	0.0260407	0.0870431
CNAG_07573	2617.73	-0.510577	0.210198	-2.42903	0.0151393	0.0607205
CNAG_00175	3399.47	-0.51057	0.147965	-3.45063	0.000559289	0.00780708
CNAG_04223	19.9595	-0.509649	0.46724	-1.09077	0.275376	NA
CNAG_01212	2068.64	-0.5093	0.257816	-1.97544	0.048218	0.134714
CNAG_06103	15128.8	-0.50922	0.129658	-3.92741	8.58661e-05	0.00277362
CNAG_02866	2104.62	-0.508453	0.152295	-3.33861	0.000841988	0.00988261
CNAG_13126	55.1226	-0.50844	0.418201	-1.21578	0.224069	0.390186
CNAG_02788	2042.05	-0.508026	0.166007	-3.06027	0.00221139	0.0175805
CNAG_04656	1879.19	-0.507803	0.226169	-2.24524	0.0247529	0.084111
CNAG_12259	340.128	-0.507149	0.371643	-1.36461	0.172375	0.327848
CNAG_03173	5290.72	-0.506795	0.25464	-1.99024	0.046564	0.131405
CNAG_00421	1007.4	-0.506585	0.168202	-3.01176	0.0025974	0.0197072
CNAG_06173	913.341	-0.506349	0.125845	-4.0236	5.73156e-05	0.00229177
CNAG_01347	6299.69	-0.505785	0.160522	-3.15087	0.00162785	0.0144765
CNAG_05496	8252.2	-0.504951	0.16735	-3.01733	0.00255016	0.0194484
CNAG_00664	478.651	-0.504396	0.241004	-2.0929	0.0363583	0.110117
CNAG_06718	93.38	-0.503982	0.334545	-1.50647	0.131946	0.272921
CNAG_01027	5717.51	-0.50383	0.121783	-4.1371	3.51725e-05	0.00175123
CNAG_05083	4098.47	-0.503802	0.151687	-3.32133	0.000895887	0.0101993
CNAG_00679	2832.76	-0.503754	0.279563	-1.80194	0.0715554	0.179566
CNAG_03445	1529	-0.502459	0.210344	-2.38875	0.0169059	0.065455
CNAG_02819	1246.41	-0.502239	0.156901	-3.201	0.00136953	0.0132406
CNAG_00156	5280.63	-0.501738	0.197447	-2.54113	0.0110495	0.0492721
CNAG_07897	354.369	-0.501318	0.17747	-2.8248	0.00473107	0.0283176
CNAG_00651	1400.06	-0.501253	0.139708	-3.58787	0.000333395	0.00578366
CNAG_06853	4675.71	-0.501229	0.172036	-2.91351	0.0035739	0.0237392
CNAG_05386	1601.44	-0.501017	0.140963	-3.55425	0.000379065	0.00620008
CNAG_03637	2497.31	-0.501016	0.116063	-4.31676	1.58338e-05	0.00112163
CNAG_07574	525.103	-0.500859	0.272486	-1.83811	0.0660469	0.169109
CNAG_02321	67.289	-0.500618	0.278078	-1.80028	0.0718165	0.17988
CNAG_04344	784.253	-0.499866	0.125882	-3.97091	7.15989e-05	0.00250981
CNAG_03854	1581.07	-0.499566	0.111005	-4.50039	6.78302e-06	0.000638829
CNAG_07403	1481.42	-0.498119	0.120504	-4.13362	3.57093e-05	0.00176671
CNAG_04637	6595.38	-0.497336	0.180884	-2.74948	0.00596906	0.0327669
CNAG_07022	10.8742	-0.497045	0.425433	-1.16833	0.242675	NA
CNAG_01350	2464.84	-0.496455	0.206839	-2.4002	0.0163863	0.0639498
CNAG_05930	2654.02	-0.495705	0.183784	-2.69722	0.00699207	0.0364623
CNAG_00800	665.501	-0.495292	0.19913	-2.48728	0.0128725	0.0545095
CNAG_12068	10.0897	-0.495162	0.480108	-1.03136	0.302374	NA
CNAG_03865	5271.78	-0.494876	0.390792	-1.26634	0.205391	0.367654
CNAG_05914	693.065	-0.494727	0.175718	-2.81546	0.00487081	0.0288999
CNAG_04150	3566.69	-0.494563	0.105912	-4.66957	3.01835e-06	0.000357491
CNAG_02467	4144.21	-0.494512	0.125149	-3.95138	7.77006e-05	0.00261804
CNAG_03910	3405.22	-0.494269	0.208247	-2.37347	0.0176218	0.0675573
CNAG_04978	357.988	-0.493847	0.252431	-1.95636	0.0504224	0.139083
CNAG_02586	105.539	-0.493716	0.274268	-1.80012	0.0718417	0.17988
CNAG_00229	1150.74	-0.493708	0.240478	-2.05303	0.0400699	0.117799
CNAG_12273	26.2265	-0.493598	0.45727	-1.07945	0.280389	0.455013
CNAG_12542	30.9268	-0.493502	0.348751	-1.41506	0.157052	0.307843
CNAG_00508	2629.97	-0.491645	0.147471	-3.33383	0.000856579	0.0099493
CNAG_01978	484.431	-0.49114	0.146082	-3.36208	0.000773584	0.00940451
CNAG_03628	3454.54	-0.490959	0.145573	-3.3726	0.000744625	0.00925394
CNAG_06738	3196.54	-0.489866	0.159674	-3.06792	0.00215557	0.0172474
CNAG_02415	2239.75	-0.48828	0.13546	-3.6046	0.000312632	0.00565705
CNAG_04891	1128.59	-0.487654	0.369921	-1.31826	0.187415	0.346096
CNAG_05377	300.035	-0.487616	0.23726	-2.0552	0.0398596	0.117465
CNAG_02133	17635.4	-0.487201	0.175147	-2.78167	0.00540806	0.0310616
CNAG_04902	2672.91	-0.486765	0.120897	-4.02626	5.66698e-05	0.00229177
CNAG_00588	10210.2	-0.486568	0.469727	-1.03585	0.300271	0.476158
CNAG_12921	541.551	-0.48635	0.178369	-2.72664	0.00639819	0.0342801
CNAG_02757	3731.57	-0.486341	0.176785	-2.75102	0.00594097	0.0327277
CNAG_07858	68.9976	-0.486222	0.325704	-1.49283	0.135481	0.277675
CNAG_01795	2029.16	-0.48605	0.118766	-4.09252	4.26719e-05	0.00195409
CNAG_02489	14.2482	-0.485923	0.456471	-1.06452	0.287092	NA
CNAG_06770	85250.4	-0.48579	0.166816	-2.91213	0.00358972	0.0237641
CNAG_02213	4142.7	-0.485639	0.121839	-3.98591	6.72214e-05	0.00246699
CNAG_12124	21.9978	-0.485595	0.467475	-1.03876	0.298916	NA
CNAG_13024	183.889	-0.485538	0.255609	-1.89953	0.0574948	0.153391
CNAG_04988	40.338	-0.484956	0.31783	-1.52583	0.127051	0.265977
CNAG_07936	6750.62	-0.484919	0.146118	-3.31869	0.000904418	0.0102313
CNAG_02094	4597.59	-0.484817	0.161692	-2.9984	0.00271406	0.0201288
CNAG_01121	1366.91	-0.484266	0.241039	-2.00907	0.0445292	0.12718
CNAG_05616	6239.81	-0.484195	0.164547	-2.94259	0.00325476	0.0223966
CNAG_12941	10.0207	-0.483935	0.453944	-1.06607	0.286394	NA
CNAG_12600	2271.83	-0.483727	0.251439	-1.92383	0.0543754	0.147289
CNAG_13107	40.362	-0.483418	0.364377	-1.3267	0.184609	0.342695
CNAG_03156	2462.64	-0.481995	0.156546	-3.07893	0.00207745	0.016811
CNAG_04015	565.399	-0.481607	0.169312	-2.84449	0.00444823	0.0270878
CNAG_12449	27.6158	-0.4811	0.397764	-1.20951	0.226466	0.393397
CNAG_05260	13237.9	-0.48107	0.12852	-3.74314	0.000181733	0.00424921
CNAG_01575	13120.6	-0.481069	0.168271	-2.85889	0.00425125	0.0262704
CNAG_03138	4788.4	-0.480868	0.184921	-2.6004	0.00931151	0.0435791
CNAG_08010	325.334	-0.480846	0.220636	-2.17936	0.0293049	0.0945425
CNAG_05873	1627.58	-0.480642	0.276231	-1.74	0.0818588	0.197314
CNAG_00627	939.457	-0.480639	0.211415	-2.27344	0.0229999	0.0802528
CNAG_13041	230.57	-0.480201	0.300687	-1.59701	0.110263	0.241098
CNAG_03783	667.06	-0.479932	0.223024	-2.15193	0.0314029	0.0994234
CNAG_04892	1121.15	-0.479585	0.12597	-3.80714	0.000140581	0.00371904
CNAG_00486	2469.97	-0.479319	0.210583	-2.27615	0.0228368	0.0798727
CNAG_12818	11.8257	-0.479073	0.458695	-1.04442	0.296289	NA
CNAG_04984	2918.89	-0.478626	0.150853	-3.17281	0.00150972	0.0138763
CNAG_00468	5420.99	-0.478202	0.132241	-3.61613	0.000299036	0.00559592
CNAG_03994	2980.28	-0.477797	0.177202	-2.69634	0.00701051	0.0365097
CNAG_05599	1610.51	-0.477742	0.174913	-2.73132	0.00630813	0.0339371
CNAG_02057	1609.95	-0.477279	0.192322	-2.48167	0.013077	0.0550471
CNAG_03676	1201.44	-0.477122	0.194251	-2.45621	0.014041	0.0577051
CNAG_02107	2595.5	-0.476367	0.191821	-2.48339	0.0130137	0.0548697
CNAG_03450	4810.52	-0.475798	0.126676	-3.75604	0.000172623	0.00411964
CNAG_04944	7782.06	-0.474997	0.148897	-3.19011	0.00142218	0.0135288
CNAG_01720	1602.59	-0.474566	0.150079	-3.16211	0.0015663	0.0141634
CNAG_12897	107.734	-0.474414	0.423261	-1.12085	0.26235	0.434398
CNAG_00043	2068.18	-0.474217	0.142986	-3.31654	0.000911397	0.0102732
CNAG_05084	6542.06	-0.474106	0.11342	-4.18008	2.91402e-05	0.00153969
CNAG_00056	1700.25	-0.473897	0.12698	-3.73206	0.000189922	0.00439238
CNAG_06440	1264.73	-0.473737	0.131725	-3.59641	0.000322634	0.00573189
CNAG_04803	13177.8	-0.473537	0.116898	-4.05087	5.10275e-05	0.00212396
CNAG_02223	6155.75	-0.472877	0.163805	-2.88683	0.00389146	0.0249397
CNAG_06566	3643.62	-0.472552	0.159522	-2.9623	0.00305346	0.0215618
CNAG_04196	6459.92	-0.471218	0.130687	-3.60571	0.000311305	0.00564611
CNAG_00977	4074.5	-0.4702	0.103704	-4.53406	5.78593e-06	0.000572514
CNAG_03797	19.4643	-0.47011	0.428962	-1.09593	0.273112	NA
CNAG_04765	3038.14	-0.469815	0.18291	-2.56856	0.0102123	0.0466837
CNAG_01337	1513.81	-0.469719	0.174899	-2.68566	0.00723865	0.0373003
CNAG_02717	5406.12	-0.469556	0.181424	-2.58816	0.00964893	0.0448695
CNAG_03674	15155.5	-0.469489	0.149042	-3.15003	0.00163252	0.0145015
CNAG_02765	239.901	-0.468961	0.169155	-2.77237	0.00556489	0.0313941
CNAG_00802	695.177	-0.468901	0.233304	-2.00983	0.0444494	0.12718
CNAG_05632	2670.18	-0.468611	0.273351	-1.71432	0.0864699	0.204705
CNAG_01745	33015	-0.468048	0.191136	-2.44877	0.0143344	0.0583254
CNAG_07634	6990.14	-0.467615	0.132739	-3.52281	0.000426992	0.00671588
CNAG_03847	4783.23	-0.467322	0.22899	-2.0408	0.0412708	0.120199
CNAG_03922	298.094	-0.466498	0.149169	-3.12731	0.00176412	0.0152715
CNAG_12165	19.9022	-0.46619	0.4569	-1.02033	0.307572	NA
CNAG_03314	3566.23	-0.465689	0.150396	-3.09641	0.00195878	0.0162871
CNAG_00516	271.913	-0.465458	0.124262	-3.74579	0.000179827	0.00422135
CNAG_05649	759.778	-0.465178	0.182951	-2.54263	0.0110021	0.0491168
CNAG_00066	17429.8	-0.465079	0.214847	-2.1647	0.0304107	0.0972669
CNAG_02347	247.663	-0.464261	0.278801	-1.66521	0.0958717	0.220241
CNAG_04023	2148.39	-0.463858	0.166965	-2.77818	0.00546644	0.0311906
CNAG_04848	5231.64	-0.46369	0.146679	-3.16126	0.00157089	0.0141634
CNAG_01743	6162.67	-0.463295	0.241567	-1.91788	0.0551265	0.148774
CNAG_06532	1243.63	-0.462996	0.133987	-3.45553	0.000549221	0.00768025
CNAG_01349	49.7012	-0.462812	0.286704	-1.61425	0.106473	0.235379
CNAG_07575	1428.94	-0.46258	0.296401	-1.56066	0.118605	0.25352
CNAG_13083	1280.81	-0.462279	0.295055	-1.56676	0.117172	0.251077
CNAG_03919	920.656	-0.462082	0.177352	-2.60545	0.00917545	0.0433905
CNAG_07559	7079.44	-0.461973	0.156621	-2.94963	0.00318157	0.0222052
CNAG_04069	7857.55	-0.461353	0.13032	-3.54015	0.000399903	0.00643219
CNAG_07808	5100.18	-0.461269	0.112759	-4.09076	4.29964e-05	0.00195409
CNAG_07755	1052.11	-0.460993	0.239965	-1.92109	0.0547205	0.148011
CNAG_03639	530.742	-0.460802	0.206009	-2.2368	0.0252994	0.0853911
CNAG_01465	1945.57	-0.459244	0.0967796	-4.74526	2.08237e-06	0.000285577
CNAG_07434	2101.41	-0.458575	0.183359	-2.50097	0.0123854	0.0531668
CNAG_12750	195.714	-0.458256	0.173484	-2.6415	0.00825405	0.0405207
CNAG_12145	33.0539	-0.458166	0.354836	-1.2912	0.196633	0.357711
CNAG_12968	895.794	-0.457942	0.253203	-1.8086	0.0705135	0.17775
CNAG_03241	2711.2	-0.45774	0.127106	-3.60123	0.000316709	0.00566987
CNAG_12287	86.3129	-0.457703	0.314398	-1.45581	0.145446	0.291079
CNAG_07852	19.4144	-0.457569	0.359126	-1.27412	0.202622	NA
CNAG_03678	1006.58	-0.457409	0.152501	-2.99939	0.0027052	0.0201013
CNAG_06011	349.064	-0.457115	0.173908	-2.62849	0.00857641	0.0415892
CNAG_07555	1029.24	-0.457063	0.163838	-2.78973	0.00527517	0.0305515
CNAG_00190	5869.38	-0.457001	0.110463	-4.13716	3.51633e-05	0.00175123
CNAG_12864	41.2236	-0.456831	0.390074	-1.17114	0.241543	0.410466
CNAG_01402	8769.55	-0.456614	0.156416	-2.91924	0.00350887	0.0235846
CNAG_03194	1562.57	-0.456542	0.197304	-2.3139	0.0206732	0.0749549
CNAG_06411	655.324	-0.456412	0.156423	-2.9178	0.00352508	0.0236288
CNAG_12112	21.3076	-0.456201	0.429371	-1.06249	0.288014	NA
CNAG_12765	181.563	-0.45571	0.243781	-1.86934	0.0615753	0.160874
CNAG_04351	3781.43	-0.455622	0.0928088	-4.90925	9.14245e-07	0.00014585
CNAG_00490	2465.6	-0.455531	0.107174	-4.25039	2.13398e-05	0.00135621
CNAG_03556	962.037	-0.455152	0.20679	-2.20104	0.0277334	0.0909362
CNAG_01090	10796.3	-0.454185	0.272552	-1.66642	0.0956306	0.219866
CNAG_01919	9084.8	-0.453944	0.181718	-2.49807	0.0124873	0.0534279
CNAG_04750	1689.81	-0.452523	0.248459	-1.82132	0.068559	0.174002
CNAG_03844	3135.37	-0.452429	0.142604	-3.17263	0.00151065	0.0138763
CNAG_05940	8574.81	-0.451435	0.191648	-2.35554	0.0184957	0.0696441
CNAG_06190	2581.09	-0.45139	0.137261	-3.28856	0.00100701	0.0109676
CNAG_04354	4294.15	-0.451203	0.187832	-2.40216	0.0162987	0.0636397
CNAG_05215	3880.63	-0.450994	0.126394	-3.56815	0.000359514	0.0060437
CNAG_03705	13151.6	-0.450933	0.145128	-3.10713	0.00188915	0.0159648
CNAG_04485	16149.6	-0.450817	0.106884	-4.21782	2.46674e-05	0.00144728
CNAG_00902	1433.5	-0.4497	0.195109	-2.30486	0.0211743	0.0762412
CNAG_12349	1015.8	-0.449363	0.161979	-2.77421	0.00553365	0.0312868
CNAG_02900	706.751	-0.448808	0.19066	-2.35397	0.0185742	0.0698052
CNAG_07476	1185.89	-0.448381	0.136303	-3.2896	0.00100332	0.0109538
CNAG_06511	4223.23	-0.44836	0.137319	-3.2651	0.00109425	0.0115748
CNAG_04818	959.71	-0.448207	0.13049	-3.4348	0.000592993	0.00804893
CNAG_06657	1842.26	-0.448043	0.249105	-1.79861	0.0720799	0.180246
CNAG_03402	1774.35	-0.44686	0.149701	-2.98502	0.00283557	0.020621
CNAG_00968	916.95	-0.446596	0.168472	-2.65085	0.00802887	0.0396724
CNAG_12200	339.305	-0.446075	0.221785	-2.0113	0.0442943	0.12697
CNAG_12740	146.728	-0.445509	0.27748	-1.60555	0.108372	0.238096
CNAG_00805	1847.77	-0.445349	0.112252	-3.96739	7.26628e-05	0.0025133
CNAG_02028	2635.11	-0.445136	0.143681	-3.09808	0.00194776	0.0162803
CNAG_04993	345.799	-0.445081	0.211362	-2.10578	0.0352233	0.107934
CNAG_06722	1088.28	-0.444136	0.202014	-2.19854	0.0279108	0.0913263
CNAG_07124	205.915	-0.444132	0.277848	-1.59847	0.109938	0.240523
CNAG_02556	532.086	-0.44355	0.202479	-2.19059	0.0284812	0.0926115
CNAG_04657	2454.11	-0.443264	0.176018	-2.51828	0.0117928	0.0515286
CNAG_01900	2138.08	-0.443081	0.165151	-2.68288	0.00729911	0.0373834
CNAG_12565	61.4668	-0.443024	0.344831	-1.28476	0.198878	0.360786
CNAG_12606	52.6856	-0.442869	0.369506	-1.19854	0.230706	0.398635
CNAG_00460	609.309	-0.442031	0.275686	-1.60339	0.108849	0.23901
CNAG_05740	781.975	-0.44117	0.138533	-3.18457	0.00144967	0.0136039
CNAG_05349	12705.5	-0.440905	0.155705	-2.83168	0.00463046	0.0278862
CNAG_04510	3252.67	-0.439517	0.128333	-3.42482	0.000615214	0.0082067
CNAG_13074	137.628	-0.439268	0.282715	-1.55375	0.120245	0.256048
CNAG_01257	5541.66	-0.439005	0.119203	-3.68283	0.000230657	0.0048731
CNAG_01115	6988.46	-0.437572	0.146545	-2.98592	0.00282725	0.020621
CNAG_02893	280.3	-0.437506	0.235959	-1.85417	0.0637154	0.164486
CNAG_03199	316.367	-0.437388	0.231693	-1.88779	0.0590547	0.156591
CNAG_04675	3585.72	-0.437141	0.230978	-1.89257	0.0584151	0.155158
CNAG_01362	6927.18	-0.436778	0.113327	-3.85415	0.000116133	0.0032773
CNAG_00171	1140.97	-0.43674	0.0898165	-4.86258	1.15867e-06	0.000181147
CNAG_01938	8117.96	-0.43615	0.10418	-4.18652	2.83267e-05	0.00153525
CNAG_12254	10.5376	-0.436034	0.443181	-0.983873	0.325178	NA
CNAG_12008	24.8526	-0.435338	0.428272	-1.0165	0.309392	NA
CNAG_12792	26.6044	-0.435197	0.396268	-1.09824	0.2721	0.445625
CNAG_02164	11651.9	-0.43483	0.153485	-2.83305	0.00461065	0.0278097
CNAG_02445	3809.33	-0.434319	0.137379	-3.16147	0.00156972	0.0141634
CNAG_06243	441.472	-0.434159	0.161249	-2.69247	0.00709245	0.0368384
CNAG_06881	3558.88	-0.434132	0.22121	-1.96254	0.0496999	0.137475
CNAG_02079	26937.5	-0.432728	0.129776	-3.33442	0.000854764	0.0099493
CNAG_04636	3678.02	-0.432375	0.128057	-3.37643	0.00073434	0.00916987
CNAG_09002	46.4856	-0.432181	0.447654	-0.965435	0.334327	0.513445
CNAG_05411	6470.64	-0.431874	0.183151	-2.35802	0.0183727	0.0693477
CNAG_07685	440.35	-0.431056	0.210674	-2.04608	0.0407482	0.119108
CNAG_03570	346.003	-0.430901	0.322869	-1.3346	0.182008	0.339318
CNAG_12526	1083.71	-0.430859	0.275371	-1.56465	0.117665	0.252067
CNAG_12325	32.6254	-0.430627	0.433137	-0.994205	0.320123	0.497495
CNAG_01597	1225.42	-0.430605	0.160724	-2.67916	0.00738072	0.0375619
CNAG_13057	326.425	-0.430094	0.147161	-2.92261	0.00347107	0.0234718
CNAG_01010	5610.45	-0.429624	0.165777	-2.59157	0.00955388	0.0445335
CNAG_12493	593.987	-0.429373	0.208511	-2.05924	0.0394715	0.116654
CNAG_07339	2213.01	-0.42904	0.193822	-2.21358	0.026858	0.0888485
CNAG_00777	9259.16	-0.428983	0.132433	-3.23923	0.00119852	0.0122468
CNAG_05042	1692.73	-0.42883	0.121237	-3.53713	0.000404495	0.00646613
CNAG_06151	5712.14	-0.428695	0.159133	-2.69395	0.00706108	0.0367242
CNAG_12096	4.01322	-0.428137	0.44526	-0.961543	0.336279	NA
CNAG_03114	11402.4	-0.428088	0.222611	-1.92303	0.0544764	0.147503
CNAG_02528	2253.02	-0.427431	0.181054	-2.3608	0.0182357	0.0690425
CNAG_12471	92.6594	-0.426396	0.310804	-1.37191	0.170091	0.325245
CNAG_12237	39.2716	-0.425716	0.338896	-1.25618	0.20905	0.37222
CNAG_04989	1010.45	-0.425492	0.157545	-2.70076	0.00691807	0.0362976
CNAG_12370	44.0611	-0.424653	0.426659	-0.995299	0.319591	0.496866
CNAG_02058	424.244	-0.424013	0.269913	-1.57092	0.116201	0.249819
CNAG_01196	3348.78	-0.423207	0.099085	-4.27115	1.94468e-05	0.00128827
CNAG_07558	9976.09	-0.422845	0.125304	-3.37456	0.000739343	0.00920988
CNAG_12048	389.048	-0.422681	0.185554	-2.27795	0.0227297	0.0796407
CNAG_12355	134.785	-0.422459	0.228413	-1.84954	0.0643798	0.165927
CNAG_01169	2521.37	-0.42207	0.11704	-3.6062	0.000310712	0.00564611
CNAG_00115	10337.1	-0.422027	0.184312	-2.28975	0.022036	0.0781204
CNAG_06149	1922.32	-0.421956	0.108462	-3.89035	0.000100098	0.00309275
CNAG_00404	1018.79	-0.421695	0.235966	-1.7871	0.0739216	0.183268
CNAG_01927	1134.3	-0.421693	0.132191	-3.19001	0.00142266	0.0135288
CNAG_03607	830.964	-0.421509	0.131931	-3.19492	0.00139871	0.0134156
CNAG_12236	12.8739	-0.420976	0.473958	-0.888215	0.374425	NA
CNAG_05172	7907.06	-0.420925	0.0968097	-4.34796	1.37409e-05	0.00103282
CNAG_12109	31.7771	-0.420769	0.400831	-1.04974	0.293836	0.469986
CNAG_00368	3114.63	-0.420596	0.129083	-3.25834	0.00112068	0.0117273
CNAG_01495	3897.31	-0.420466	0.117728	-3.57151	0.000354924	0.00600528
CNAG_02427	3594.64	-0.420439	0.148106	-2.83878	0.00452868	0.027485
CNAG_00426	4082.43	-0.420422	0.110015	-3.82149	0.000132645	0.00355099
CNAG_05834	3473.06	-0.420346	0.126795	-3.31516	0.000915911	0.0103017
CNAG_02519	2074.56	-0.420294	0.157782	-2.66376	0.00772728	0.0387703
CNAG_12482	307.849	-0.420047	0.29025	-1.44719	0.147843	0.294443
CNAG_04104	2013.07	-0.420036	0.0773785	-5.42833	5.68822e-08	2.96432e-05
CNAG_07360	1398.5	-0.420014	0.13577	-3.09356	0.00197767	0.0163247
CNAG_07305	205.008	-0.419919	0.48455	-0.866616	0.386153	0.564849
CNAG_01728	3486.38	-0.419553	0.174542	-2.40374	0.0162282	0.0634597
CNAG_04338	3629.38	-0.419524	0.126082	-3.3274	0.000876592	0.0101308
CNAG_07836	113.465	-0.41935	0.21039	-1.9932	0.0462398	0.130726
CNAG_02995	4689.15	-0.419312	0.159875	-2.62274	0.00872251	0.0420435
CNAG_12417	80.0395	-0.419308	0.458768	-0.913987	0.360724	0.540498
CNAG_05317	1531.44	-0.419173	0.145108	-2.88871	0.00386831	0.0248877
CNAG_01525	1057.26	-0.41884	0.252897	-1.65617	0.0976874	0.222878
CNAG_04173	3239.52	-0.418804	0.152829	-2.74034	0.00613759	0.0332479
CNAG_13206	611.889	-0.418131	0.172502	-2.42393	0.0153537	0.0612348
CNAG_05736	196.382	-0.417095	0.314572	-1.32591	0.184868	0.343012
CNAG_13143	13.2761	-0.41709	0.484322	-0.861184	0.389136	NA
CNAG_04987	1493.42	-0.416814	0.22297	-1.86937	0.0615709	0.160874
CNAG_01651	686.2	-0.416773	0.136198	-3.06005	0.00221302	0.0175805
CNAG_01875	2930.69	-0.416346	0.138455	-3.00709	0.00263758	0.0198823
CNAG_03361	1257.47	-0.415922	0.155206	-2.67981	0.0073663	0.0375374
CNAG_05337	2411.91	-0.415054	0.159505	-2.60214	0.00926449	0.0435791
CNAG_01097	5680.09	-0.414984	0.124804	-3.32509	0.000883908	0.0101397
CNAG_07896	168.59	-0.414543	0.444047	-0.933558	0.350532	0.529798
CNAG_03182	2397.74	-0.414502	0.159396	-2.60045	0.00931019	0.0435791
CNAG_03648	9865.19	-0.413859	0.103325	-4.0054	6.19114e-05	0.00237436
CNAG_07583	2669.11	-0.413838	0.0720865	-5.74085	9.42002e-09	9.37222e-06
CNAG_06313	32367.8	-0.413605	0.109952	-3.76169	0.000168766	0.00407677
CNAG_07990	589.856	-0.413467	0.119441	-3.46167	0.000536836	0.00757482
CNAG_05613	8276.99	-0.413437	0.111496	-3.70809	0.000208832	0.00465083
CNAG_05570	1664.39	-0.413372	0.145343	-2.84413	0.00445334	0.0270878
CNAG_07027	2314.54	-0.413069	0.15312	-2.69768	0.00698254	0.0364369
CNAG_02904	792.16	-0.412628	0.177063	-2.3304	0.019785	0.073048
CNAG_12663	246.359	-0.411814	0.330096	-1.24756	0.212193	0.375955
CNAG_05379	1968.96	-0.411715	0.156668	-2.62795	0.00859022	0.0416046
CNAG_07704	282.788	-0.411574	0.192327	-2.13997	0.0323574	0.101638
CNAG_01039	8391.52	-0.411444	0.127946	-3.21575	0.00130104	0.0129227
CNAG_00371	1055.16	-0.411268	0.140486	-2.92746	0.00341746	0.0231694
CNAG_00442	5224.2	-0.410988	0.171664	-2.39414	0.0166592	0.064724
CNAG_02402	2649.79	-0.410867	0.128987	-3.18533	0.00144591	0.0135849
CNAG_05212	125.684	-0.410777	0.233164	-1.76175	0.0781107	0.190691
CNAG_01108	1920.32	-0.410567	0.127645	-3.21648	0.00129774	0.0129064
CNAG_04308	1737.03	-0.410091	0.137179	-2.98946	0.00279469	0.0205152
CNAG_01543	2272.74	-0.409622	0.1372	-2.98558	0.00283041	0.020621
CNAG_06067	1075.85	-0.408385	0.144756	-2.82119	0.00478464	0.028529
CNAG_01542	5154.04	-0.408088	0.276734	-1.47466	0.140304	0.28428
CNAG_12174	124.62	-0.407442	0.203837	-1.99887	0.0456227	0.129496
CNAG_00921	3301.45	-0.407124	0.18243	-2.23167	0.0256371	0.0860847
CNAG_02372	5273.79	-0.406876	0.134023	-3.03587	0.00239844	0.0185813
CNAG_04617	552.684	-0.406862	0.199798	-2.03636	0.041714	0.121094
CNAG_04862	5565.02	-0.406286	0.206657	-1.96599	0.0492998	0.136735
CNAG_07844	63.0722	-0.405976	0.30913	-1.31328	0.189087	0.348301
CNAG_02237	10881.6	-0.404909	0.0817877	-4.95073	7.39339e-07	0.000134967
CNAG_07927	387.207	-0.404888	0.251966	-1.60692	0.108073	0.237779
CNAG_00305	7740.36	-0.404461	0.0889335	-4.5479	5.41837e-06	0.000547964
CNAG_05682	17299	-0.404356	0.156432	-2.58487	0.00974171	0.0451399
CNAG_05279	220.973	-0.40393	0.249902	-1.61635	0.106018	0.234572
CNAG_03872	3175.79	-0.4039	0.0934051	-4.32417	1.53106e-05	0.00112163
CNAG_01128	3690.4	-0.403419	0.181289	-2.22528	0.0260624	0.0870431
CNAG_12725	53.4493	-0.40327	0.228353	-1.766	0.0773967	0.189658
CNAG_12478	1.19995	-0.403032	0.425677	-0.946802	0.34374	NA
CNAG_01824	9423.02	-0.402911	0.101442	-3.97183	7.1322e-05	0.00250981
CNAG_00515	903.073	-0.402696	0.129233	-3.11606	0.00183288	0.0156415
CNAG_06372	4092.92	-0.402447	0.287354	-1.40053	0.161356	0.313519
CNAG_12619	380.054	-0.402351	0.302689	-1.32926	0.183763	0.341662
CNAG_04218	285.777	-0.401979	0.200076	-2.00913	0.0445238	0.12718
CNAG_12099	139.629	-0.401326	0.307605	-1.30468	0.192003	0.351742
CNAG_03752	1683.44	-0.401297	0.156837	-2.55869	0.0105067	0.047612
CNAG_12636	78.9895	-0.401156	0.288665	-1.38969	0.164622	0.317662
CNAG_01155	14806.4	-0.400926	0.19076	-2.10174	0.0355765	0.108521
CNAG_01892	9150.6	-0.400873	0.183441	-2.18529	0.0288673	0.0935167
CNAG_02332	2001.96	-0.400549	0.146826	-2.72805	0.00637103	0.034158
CNAG_02543	4000.03	-0.399875	0.190543	-2.09861	0.0358517	0.109069
CNAG_00537	1741.14	-0.399662	0.123453	-3.23736	0.00120639	0.0122791
CNAG_04837	715.321	-0.399606	0.285177	-1.40126	0.161138	0.313336
CNAG_00531	47999.4	-0.399058	0.151657	-2.63131	0.00850565	0.041323
CNAG_02764	1422.82	-0.398331	0.162513	-2.45106	0.0142435	0.0582027
CNAG_01686	9892.08	-0.398226	0.176156	-2.26064	0.0237815	0.0820389
CNAG_06541	27216.6	-0.39809	0.24402	-1.63138	0.10281	0.230436
CNAG_05774	2037.63	-0.398077	0.218017	-1.8259	0.0678656	0.172522
CNAG_01811	3989.95	-0.397688	0.122659	-3.24222	0.00118603	0.0121669
CNAG_06593	1914.12	-0.397602	0.20244	-1.96405	0.0495246	0.137087
CNAG_01674	234.791	-0.397584	0.167045	-2.3801	0.0173078	0.0667136
CNAG_12829	81.8589	-0.397577	0.38271	-1.03885	0.298876	0.474572
CNAG_05218	9370.27	-0.397375	0.144076	-2.7581	0.00581392	0.032393
CNAG_06983	3546.59	-0.397289	0.129059	-3.07835	0.00208153	0.0168266
CNAG_00692	2769.69	-0.3968	0.137235	-2.89139	0.0038354	0.024819
CNAG_05231	3713.68	-0.396393	0.112667	-3.51826	0.000434383	0.00678812
CNAG_06215	902.207	-0.395607	0.155419	-2.54542	0.0109146	0.0488769
CNAG_01605	2132.56	-0.39555	0.247669	-1.59709	0.110246	0.241098
CNAG_00929	3636.35	-0.395547	0.157472	-2.51186	0.0120098	0.052156
CNAG_06170	5379.45	-0.394495	0.116476	-3.38693	0.000706787	0.00895454
CNAG_06499	5621.03	-0.394389	0.0766258	-5.14695	2.64762e-07	6.67627e-05
CNAG_05505	1094.7	-0.393823	0.129302	-3.04576	0.00232093	0.0181065
CNAG_03920	5774.2	-0.393762	0.11346	-3.47047	0.000519539	0.00745182
CNAG_04809	2169.15	-0.393518	0.130467	-3.01622	0.00255946	0.0194882
CNAG_03391	1275.91	-0.393263	0.0998085	-3.94018	8.14211e-05	0.00266305
CNAG_00787	2537.21	-0.393111	0.11488	-3.42191	0.00062182	0.00826661
CNAG_01412	8235.26	-0.392466	0.147782	-2.65571	0.00791415	0.0394074
CNAG_12389	151.695	-0.392464	0.259887	-1.51013	0.131009	0.271861
CNAG_05035	1281.84	-0.392092	0.157176	-2.4946	0.0126097	0.0537754
CNAG_00469	3290.3	-0.392071	0.130594	-3.00221	0.0026803	0.0199923
CNAG_12756	213.345	-0.391956	0.230105	-1.70338	0.0884976	0.207743
CNAG_13182	23.389	-0.391754	0.436216	-0.898072	0.369147	NA
CNAG_12242	51.9978	-0.391674	0.253599	-1.54446	0.122477	0.259389
CNAG_04724	5698.15	-0.391632	0.0980445	-3.99443	6.48513e-05	0.0024078
CNAG_12998	34.9302	-0.390985	0.374047	-1.04528	0.295893	0.47204
CNAG_07431	3466.95	-0.390953	0.112478	-3.47583	0.000509269	0.00741333
CNAG_05658	74.3627	-0.390662	0.344776	-1.13309	0.257177	0.428483
CNAG_01692	4769.54	-0.390606	0.161526	-2.41823	0.0155963	0.0618428
CNAG_07029	3236.3	-0.39022	0.170634	-2.28688	0.0222029	0.0784276
CNAG_00768	4399.75	-0.390077	0.149363	-2.61161	0.00901177	0.0427408
CNAG_02149	805.671	-0.389918	0.288645	-1.35085	0.176742	0.332673
CNAG_07674	626.778	-0.389745	0.203977	-1.91073	0.0560398	0.150455
CNAG_07658	28.857	-0.388848	0.472136	-0.823592	0.410172	0.585728
CNAG_01518	1277.46	-0.388538	0.155982	-2.49092	0.0127412	0.0541881
CNAG_12184	12.6537	-0.388466	0.471048	-0.824684	0.409551	NA
CNAG_06395	15.623	-0.388156	0.468327	-0.828815	0.407209	NA
CNAG_13118	528.499	-0.387565	0.267513	-1.44877	0.147402	0.293789
CNAG_01848	7556.54	-0.387485	0.107395	-3.60805	0.000308503	0.00564611
CNAG_05464	866.219	-0.386772	0.202067	-1.91408	0.0556099	0.149485
CNAG_07042	8.64238	-0.386751	0.478534	-0.808201	0.418975	NA
CNAG_02594	1143.71	-0.385613	0.12145	-3.17508	0.00149796	0.0138314
CNAG_04131	7016.02	-0.385528	0.12644	-3.04909	0.00229537	0.0179969
CNAG_02357	3120.49	-0.385095	0.16071	-2.39621	0.0165656	0.0644567
CNAG_04747	1866.81	-0.384747	0.215918	-1.78191	0.0747632	0.184827
CNAG_00403	1110.65	-0.384323	0.104498	-3.6778	0.000235256	0.00495686
CNAG_04060	617.984	-0.38407	0.13709	-2.80159	0.00508518	0.0298606
CNAG_05707	2542.52	-0.383693	0.20611	-1.8616	0.0626601	0.162675
CNAG_02063	9937.29	-0.383578	0.179879	-2.13243	0.0329719	0.102727
CNAG_00654	3082	-0.383265	0.283286	-1.35293	0.17608	0.332066
CNAG_05735	880.915	-0.383228	0.169752	-2.25758	0.0239717	0.0824799
CNAG_04241	2116.16	-0.383122	0.148774	-2.5752	0.0100182	0.0461474
CNAG_00923	2023.59	-0.382954	0.130051	-2.94465	0.00323321	0.0223031
CNAG_12043	60.4651	-0.382674	0.293251	-1.30494	0.191914	0.351742
CNAG_03746	1590.98	-0.382498	0.134191	-2.85039	0.00436651	0.02675
CNAG_04718	1019.81	-0.382126	0.134366	-2.84391	0.0044563	0.0270878
CNAG_12961	182.09	-0.381888	0.301967	-1.26467	0.20599	0.368191
CNAG_01471	2632.36	-0.381848	0.123345	-3.09576	0.00196308	0.0162871
CNAG_06569	2325.65	-0.38068	0.107699	-3.53467	0.000408291	0.00648701
CNAG_04524	6775.08	-0.380437	0.12625	-3.01336	0.00258371	0.0196277
CNAG_01138	11658.2	-0.380207	0.168505	-2.25635	0.0240489	0.0825967
CNAG_04741	9103.08	-0.379985	0.091525	-4.1517	3.3001e-05	0.00167512
CNAG_03252	28.9069	-0.379802	0.485562	-0.78219	0.434103	0.606937
CNAG_06371	1932.8	-0.379623	0.215721	-1.75979	0.0784433	0.191264
CNAG_04687	107105	-0.379577	0.206271	-1.84019	0.0657406	0.168561
CNAG_01947	557.99	-0.379248	0.11903	-3.18615	0.00144179	0.0135743
CNAG_01977	207.195	-0.378872	0.193302	-1.96	0.0499955	0.138195
CNAG_04195	5706.37	-0.377616	0.127438	-2.96313	0.00304524	0.0215617
CNAG_12826	12.1897	-0.37754	0.426533	-0.885135	0.376084	NA
CNAG_05066	659.054	-0.377135	0.210953	-1.78777	0.0738128	0.183115
CNAG_01331	2830.74	-0.376666	0.162053	-2.32434	0.0201073	0.0737235
CNAG_06493	3736.46	-0.37583	0.333691	-1.12628	0.260045	0.431678
CNAG_13031	908.38	-0.375592	0.420114	-0.894024	0.371309	0.550383
CNAG_02505	2914.89	-0.375331	0.138748	-2.70513	0.00682774	0.0360868
CNAG_03352	1444.29	-0.375319	0.206663	-1.81609	0.069356	0.175796
CNAG_03927	606.884	-0.375064	0.109017	-3.4404	0.000580848	0.00793792
CNAG_00408	1950.37	-0.374643	0.106098	-3.5311	0.000413836	0.00653526
CNAG_00318	2604.48	-0.37447	0.175413	-2.13479	0.0327779	0.102367
CNAG_05639	7210.11	-0.373897	0.117245	-3.18903	0.00142752	0.0135424
CNAG_05407	2890.21	-0.372951	0.136119	-2.73989	0.00614599	0.0332479
CNAG_04911	1959.74	-0.372876	0.183123	-2.0362	0.0417299	0.121094
CNAG_02527	10173.6	-0.371697	0.166128	-2.23741	0.0252595	0.08533
CNAG_07722	37.3144	-0.371364	0.30894	-1.20206	0.22934	0.396802
CNAG_07594	1678.27	-0.371265	0.142603	-2.6035	0.00922781	0.0435184
CNAG_01125	8431.99	-0.371154	0.149765	-2.47824	0.0132032	0.0554589
CNAG_12509	28.6017	-0.370766	0.477376	-0.776676	0.43735	0.610167
CNAG_06322	1330.54	-0.370487	0.134494	-2.75467	0.00587512	0.0325946
CNAG_10117	1.40534	-0.369922	0.428236	-0.863828	0.387682	NA
CNAG_06923	139930	-0.369904	0.211035	-1.75281	0.0796351	0.193331
CNAG_03151	1917.94	-0.369788	0.140011	-2.64114	0.00826277	0.0405207
CNAG_03245	23108.3	-0.369322	0.096073	-3.84418	0.000120958	0.00338434
CNAG_12608	194.119	-0.369266	0.243215	-1.51827	0.128946	0.269224
CNAG_01613	6727.69	-0.369148	0.143644	-2.56989	0.0101732	0.0465918
CNAG_03596	14466.3	-0.368381	0.110197	-3.34294	0.000828971	0.00977055
CNAG_02873	1061.2	-0.368293	0.169816	-2.16878	0.0300998	0.0966283
CNAG_06432	19117.2	-0.36818	0.152089	-2.42083	0.0154852	0.0616021
CNAG_03786	1079.54	-0.367651	0.120429	-3.05285	0.00226677	0.0178622
CNAG_06337	2863.94	-0.366674	0.198807	-1.84437	0.0651298	0.167379
CNAG_01446	83470.7	-0.366069	0.228644	-1.60104	0.109367	0.239684
CNAG_01635	2327.52	-0.365922	0.144096	-2.53943	0.0111033	0.0494555
CNAG_00559	3276.99	-0.365837	0.258176	-1.417	0.156482	0.307281
CNAG_04305	1197.95	-0.365502	0.144697	-2.52598	0.0115375	0.0507818
CNAG_07492	126.606	-0.364709	0.205562	-1.77421	0.0760292	0.187305
CNAG_02289	1518.69	-0.364634	0.181526	-2.00872	0.0445672	0.127239
CNAG_02222	2361.48	-0.364289	0.162205	-2.24586	0.024713	0.0840284
CNAG_02577	15315.5	-0.36424	0.216691	-1.68092	0.0927792	0.215145
CNAG_04579	1509.58	-0.363971	0.121744	-2.98965	0.002793	0.0205152
CNAG_02131	1636.45	-0.363864	0.222882	-1.63254	0.102566	0.230137
CNAG_05460	1062.19	-0.363816	0.153331	-2.37274	0.0176565	0.0676572
CNAG_07176	40.3019	-0.363731	0.471913	-0.770759	0.44085	0.61353
CNAG_03974	8547.55	-0.363705	0.102283	-3.55587	0.000376726	0.00619965
CNAG_00357	1441.99	-0.36362	0.15111	-2.40632	0.016114	0.0632169
CNAG_01769	3698.02	-0.363361	0.0756381	-4.80394	1.5557e-06	0.000229451
CNAG_04943	3327.97	-0.363221	0.167726	-2.16557	0.0303444	0.097214
CNAG_12866	141.231	-0.363214	0.318397	-1.14076	0.253971	0.425153
CNAG_00050	784.92	-0.363117	0.220179	-1.64919	0.0991092	0.224833
CNAG_02863	1.23304	-0.362905	0.451657	-0.803497	0.421688	NA
CNAG_07826	214.882	-0.36276	0.264831	-1.36978	0.170755	0.326276
CNAG_01466	2700.01	-0.362723	0.200376	-1.81021	0.0702632	0.177373
CNAG_12884	114.667	-0.362658	0.278749	-1.30102	0.193251	0.353378
CNAG_05124	3954.5	-0.36233	0.0812122	-4.46152	8.13794e-06	0.000735922
CNAG_00540	261.465	-0.36207	0.240685	-1.50433	0.132496	0.273639
CNAG_05628	1913.88	-0.361513	0.114575	-3.15524	0.00160366	0.0143266
CNAG_07032	15253.4	-0.361092	0.169132	-2.13497	0.0327635	0.102363
CNAG_00993	2133.87	-0.361075	0.170739	-2.11478	0.0344491	0.106186
CNAG_12230	152.664	-0.360933	0.240952	-1.49795	0.134147	0.276054
CNAG_12073	16.1401	-0.360009	0.403212	-0.892851	0.371937	NA
CNAG_04531	4874.67	-0.359939	0.195709	-1.83916	0.0658918	0.168822
CNAG_04238	922.206	-0.359658	0.127788	-2.8145	0.00488532	0.0289088
CNAG_12470	120.064	-0.359629	0.283568	-1.26823	0.204716	0.36709
CNAG_00289	1018.77	-0.358878	0.139805	-2.56699	0.0102584	0.04684
CNAG_12128	64.9557	-0.35876	0.293291	-1.22322	0.221246	0.386827
CNAG_01540	1734.06	-0.358548	0.0942403	-3.80462	0.000142022	0.00372546
CNAG_01223	2745.27	-0.358443	0.123422	-2.9042	0.00368189	0.0242275
CNAG_04063	1017.99	-0.357904	0.238582	-1.50013	0.13358	0.275223
CNAG_06214	3864.4	-0.357896	0.126406	-2.83133	0.00463546	0.0278949
CNAG_02975	3089.87	-0.357751	0.134397	-2.66191	0.00776995	0.0389343
CNAG_13123	89.3292	-0.357734	0.253443	-1.4115	0.158098	0.309145
CNAG_05339	3270.66	-0.357404	0.119269	-2.99662	0.00272992	0.020189
CNAG_07517	2066.13	-0.357355	0.136256	-2.62267	0.00872436	0.0420435
CNAG_01382	1476.03	-0.355573	0.103545	-3.43398	0.000594781	0.00805789
CNAG_01307	9609.44	-0.355379	0.116194	-3.0585	0.00222444	0.0176354
CNAG_12626	81.0666	-0.355251	0.317588	-1.11859	0.263315	0.435426
CNAG_06391	275.389	-0.355138	0.188931	-1.87972	0.0601457	0.158463
CNAG_12798	1910.5	-0.354666	0.169788	-2.08887	0.0367192	0.11091
CNAG_01739	1753	-0.354645	0.132089	-2.68488	0.00725548	0.0373141
CNAG_05500	2485.28	-0.354095	0.14591	-2.42681	0.0152323	0.0609078
CNAG_02592	579.29	-0.35371	0.146156	-2.42008	0.0155169	0.0616655
CNAG_07348	1399.3	-0.353478	0.214211	-1.65014	0.098915	0.224542
CNAG_12789	1290.08	-0.353448	0.153188	-2.30729	0.0210387	0.0757879
CNAG_12375	189.347	-0.353094	0.380846	-0.927132	0.353858	0.532969
CNAG_00402	13590.7	-0.353084	0.110253	-3.20249	0.00136246	0.0132191
CNAG_07801	4784.58	-0.35296	0.122597	-2.87902	0.00398913	0.0253109
CNAG_01555	146.966	-0.352158	0.194371	-1.81178	0.0700196	0.177076
CNAG_05878	15295.9	-0.351976	0.140032	-2.51353	0.0119529	0.0520244
CNAG_02009	2480.7	-0.351841	0.135547	-2.59572	0.00943924	0.044078
CNAG_06155	2583.59	-0.351803	0.1138	-3.09142	0.00199203	0.0164086
CNAG_04273	4433.82	-0.351687	0.159714	-2.20198	0.027667	0.0908619
CNAG_07310	1508.17	-0.351485	0.186182	-1.88786	0.0590453	0.156591
CNAG_07446	3273.95	-0.351064	0.142782	-2.45875	0.0139423	0.0575252
CNAG_00625	6316.02	-0.350894	0.126785	-2.76764	0.00564635	0.0317765
CNAG_06659	2188.69	-0.350669	0.0905758	-3.87156	0.000108141	0.00316607
CNAG_06302	1849.2	-0.350514	0.199693	-1.75526	0.0792149	0.192724
CNAG_02674	863.57	-0.350146	0.153368	-2.28304	0.0224278	0.0788959
CNAG_00938	2091.54	-0.349818	0.163201	-2.14348	0.0320746	0.101058
CNAG_02895	5948.43	-0.349282	0.0827268	-4.22212	2.42018e-05	0.00143322
CNAG_07489	5794.07	-0.349027	0.153702	-2.27081	0.0231588	0.080511
CNAG_01504	1530.78	-0.348905	0.148666	-2.34691	0.01893	0.0707005
CNAG_04766	63.7075	-0.348588	0.394165	-0.88437	0.376497	0.554983
CNAG_06256	4.38431	-0.348104	0.481408	-0.723096	0.469621	NA
CNAG_04954	8238.69	-0.348027	0.110706	-3.14371	0.0016682	0.0146802
CNAG_00970	7440.41	-0.347741	0.106117	-3.27697	0.00104926	0.0112358
CNAG_04806	7883.95	-0.347605	0.155398	-2.23686	0.0252952	0.0853911
CNAG_00174	4426.43	-0.34758	0.146581	-2.37124	0.0177284	0.0678995
CNAG_03050	898.547	-0.347297	0.128064	-2.7119	0.00668992	0.0355507
CNAG_02104	3013.49	-0.346565	0.155969	-2.22202	0.0262819	0.0874981
CNAG_05469	3043.58	-0.34638	0.105143	-3.29437	0.000986434	0.01083
CNAG_04133	1344.71	-0.346346	0.170433	-2.03215	0.0421384	0.121953
CNAG_12537	126.616	-0.346133	0.193567	-1.78818	0.0737462	0.183066
CNAG_07571	6181.45	-0.345968	0.106279	-3.25528	0.00113282	0.011807
CNAG_05533	2209.68	-0.345941	0.140548	-2.46137	0.0138407	0.057427
CNAG_07661	2360.7	-0.345408	0.10678	-3.23477	0.00121742	0.0123272
CNAG_03726	6112.17	-0.344643	0.0953896	-3.613	0.000302674	0.00560664
CNAG_02767	1075.21	-0.34448	0.138428	-2.48851	0.0128278	0.0544586
CNAG_07730	78.8342	-0.344428	0.280572	-1.22759	0.219601	0.384892
CNAG_06150	17870.7	-0.344182	0.103703	-3.31893	0.000903639	0.0102313
CNAG_12918	51.4067	-0.344147	0.329983	-1.04292	0.296983	0.473007
CNAG_06553	3122.47	-0.343989	0.152137	-2.26105	0.0237564	0.0819885
CNAG_03626	3535.49	-0.34354	0.119016	-2.8865	0.00389553	0.0249397
CNAG_06790	6888.76	-0.343233	0.110227	-3.11387	0.00184648	0.0157232
CNAG_12450	344.014	-0.343166	0.267387	-1.28341	0.19935	0.361235
CNAG_03575	3517.13	-0.343142	0.127076	-2.70029	0.00692798	0.0362976
CNAG_05852	3632.76	-0.342654	0.103323	-3.31633	0.000912065	0.0102732
CNAG_05219	2770.74	-0.342359	0.106524	-3.21393	0.00130934	0.0129542
CNAG_13190	40.9952	-0.341889	0.382974	-0.892722	0.372006	0.550961
CNAG_12731	354.507	-0.341718	0.245486	-1.392	0.163921	0.316841
CNAG_02423	3919.28	-0.341493	0.106254	-3.21391	0.0013094	0.0129542
CNAG_01061	1374.97	-0.340916	0.176482	-1.93173	0.0533926	0.145324
CNAG_01380	3201.05	-0.340913	0.119856	-2.84435	0.00445027	0.0270878
CNAG_04152	1711.78	-0.340882	0.114276	-2.98296	0.00285471	0.0207199
CNAG_03687	1356.62	-0.340633	0.124066	-2.74559	0.00604029	0.0330055
CNAG_06161	3502.56	-0.340425	0.145967	-2.33221	0.0196898	0.0728731
CNAG_06871	3478.43	-0.340203	0.113754	-2.99067	0.00278362	0.0204892
CNAG_00801	312.406	-0.340165	0.253944	-1.33952	0.1804	0.337769
CNAG_05521	13020.1	-0.339955	0.182892	-1.85877	0.0630594	0.163357
CNAG_12883	102.964	-0.339504	0.441075	-0.76972	0.441466	0.613937
CNAG_12149	56.3329	-0.339441	0.32151	-1.05577	0.291073	0.467019
CNAG_02431	1825.71	-0.339327	0.148983	-2.27762	0.0227491	0.0796655
CNAG_00937	123.428	-0.339148	0.224208	-1.51264	0.13037	0.27111
CNAG_00322	1368.19	-0.338953	0.139588	-2.42824	0.0151723	0.0608203
CNAG_01855	3240.51	-0.338831	0.155003	-2.18595	0.0288189	0.0934374
CNAG_05808	1293.86	-0.338709	0.180274	-1.87886	0.0602642	0.158668
CNAG_12755	198.059	-0.338148	0.242678	-1.3934	0.163498	0.316526
CNAG_02553	342.572	-0.33792	0.168197	-2.00907	0.0445299	0.12718
CNAG_12581	107.53	-0.337816	0.207993	-1.62417	0.104339	0.232172
CNAG_04502	5196.19	-0.337795	0.106306	-3.17756	0.00148518	0.0137555
CNAG_05833	221.79	-0.337615	0.216352	-1.56049	0.118643	0.25352
CNAG_05384	3936.28	-0.337556	0.103306	-3.26754	0.00108486	0.0115434
CNAG_04369	503.576	-0.337517	0.176817	-1.90885	0.0562818	0.150928
CNAG_00879	28771.8	-0.337501	0.171145	-1.97202	0.0486075	0.135412
CNAG_05907	20202.4	-0.337325	0.0936623	-3.6015	0.000316389	0.00566987
CNAG_07872	86.2448	-0.337313	0.313712	-1.07523	0.282272	0.457085
CNAG_12524	8.98789	-0.336982	0.445324	-0.756712	0.449222	NA
CNAG_07493	386.842	-0.336948	0.161691	-2.0839	0.0371694	0.11188
CNAG_07894	10.9139	-0.336676	0.47529	-0.708358	0.478723	NA
CNAG_00833	374.564	-0.336579	0.214445	-1.56954	0.116523	0.250304
CNAG_03741	4.86739	-0.336382	0.483621	-0.695549	0.486711	NA
CNAG_03630	361.324	-0.336232	0.209832	-1.60238	0.109071	0.239295
CNAG_07910	48.9669	-0.336052	0.394912	-0.850954	0.394795	0.5732
CNAG_00450	7965.84	-0.335815	0.0789933	-4.25119	2.12638e-05	0.00135621
CNAG_06552	3284.55	-0.335459	0.0922896	-3.63485	0.00027814	0.00544917
CNAG_02874	2405.96	-0.335407	0.164098	-2.04395	0.0409587	0.119512
CNAG_01541	475.98	-0.335406	0.180844	-1.85467	0.0636438	0.164464
CNAG_05824	1644.11	-0.335291	0.141508	-2.36942	0.0178161	0.0679828
CNAG_02667	1708.82	-0.335086	0.199435	-1.68018	0.092923	0.215302
CNAG_12903	100.702	-0.334773	0.28417	-1.17807	0.238767	0.407343
CNAG_01022	2313.99	-0.33468	0.142882	-2.34235	0.019163	0.0712979
CNAG_04056	1847.96	-0.334621	0.106239	-3.1497	0.00163436	0.0145015
CNAG_02306	1945.85	-0.334472	0.122301	-2.73482	0.00624151	0.0336018
CNAG_04154	121.117	-0.334282	0.314877	-1.06163	0.288405	0.464167
CNAG_06551	1025.26	-0.334181	0.13568	-2.46301	0.0137776	0.0572259
CNAG_05461	550.938	-0.334158	0.140971	-2.3704	0.0177688	0.0679828
CNAG_04093	456.602	-0.333716	0.205553	-1.6235	0.104483	0.232425
CNAG_01744	36000.8	-0.333563	0.141927	-2.35024	0.0187611	0.0702375
CNAG_02585	20166.9	-0.333441	0.136059	-2.45072	0.0142572	0.0582282
CNAG_05130	2566.3	-0.333418	0.155876	-2.139	0.0324357	0.101746
CNAG_03143	130264	-0.333012	0.262326	-1.26946	0.204278	0.366752
CNAG_07711	35.8059	-0.332799	0.42742	-0.778623	0.436202	0.609109
CNAG_13133	219.065	-0.33269	0.162129	-2.05201	0.0401691	0.118002
CNAG_12017	30.5439	-0.332395	0.385359	-0.86256	0.38838	0.567046
CNAG_07757	4404.22	-0.332095	0.16557	-2.00577	0.044881	0.127965
CNAG_12511	1421.78	-0.332016	0.269583	-1.23159	0.218102	0.383211
CNAG_04442	57.1528	-0.331962	0.292708	-1.13411	0.25675	0.42832
CNAG_13179	40.3531	-0.33152	0.390273	-0.849456	0.395627	0.574089
CNAG_05793	1651.4	-0.331508	0.134387	-2.46681	0.0136322	0.0567126
CNAG_07375	6004.11	-0.331499	0.093493	-3.54571	0.000391561	0.00635184
CNAG_03959	6113.19	-0.33096	0.155947	-2.12226	0.0338158	0.10473
CNAG_00121	15077.3	-0.330677	0.135121	-2.44726	0.0143947	0.058484
CNAG_05540	17895.9	-0.330656	0.0901751	-3.66682	0.000245589	0.00506536
CNAG_02604	554.039	-0.330584	0.123227	-2.68272	0.0073026	0.0373834
CNAG_00048	415.82	-0.330443	0.1481	-2.23122	0.0256668	0.0861473
CNAG_03157	3049.69	-0.330123	0.0974062	-3.38914	0.000701114	0.00891156
CNAG_01222	8107.48	-0.330087	0.131568	-2.50887	0.012112	0.0523968
CNAG_01491	2088.06	-0.328847	0.119721	-2.74679	0.00601822	0.0329212
CNAG_00757	3772.07	-0.328697	0.132728	-2.47648	0.0132686	0.0556742
CNAG_03887	575.79	-0.328232	0.151582	-2.16538	0.0303587	0.0972199
CNAG_00496	1114.12	-0.328228	0.117341	-2.79721	0.00515462	0.0301148
CNAG_04016	194.125	-0.32796	0.21967	-1.49296	0.135447	0.277675
CNAG_02716	3666.36	-0.327916	0.0975887	-3.36019	0.0007789	0.00943624
CNAG_01221	1818.49	-0.327871	0.164002	-1.99919	0.0455878	0.129491
CNAG_01699	2353.99	-0.327858	0.086865	-3.77434	0.000160435	0.003994
CNAG_01794	1119.65	-0.327185	0.123878	-2.64119	0.00826163	0.0405207
CNAG_12613	17.7994	-0.327152	0.435709	-0.750849	0.452743	NA
CNAG_05395	3295.91	-0.327027	0.107052	-3.05486	0.00225168	0.0177972
CNAG_01063	6445.49	-0.326612	0.100265	-3.2575	0.00112397	0.011743
CNAG_04796	8117.5	-0.326603	0.112086	-2.91385	0.00357001	0.0237392
CNAG_12191	28.9783	-0.325996	0.386328	-0.843831	0.398764	0.575861
CNAG_06559	1327.21	-0.325744	0.231154	-1.40921	0.158774	0.309973
CNAG_01147	2619.09	-0.325662	0.162367	-2.00571	0.0448868	0.127965
CNAG_04994	926.277	-0.325621	0.132496	-2.45759	0.0139871	0.0576153
CNAG_06232	1881.59	-0.325485	0.239188	-1.36079	0.17358	0.329221
CNAG_06675	3139.77	-0.325335	0.113079	-2.87706	0.00401403	0.0254276
CNAG_04438	1659.36	-0.325321	0.140688	-2.31236	0.0207581	0.0750537
CNAG_05482	975.358	-0.325255	0.159288	-2.04192	0.041159	0.119963
CNAG_12679	122.404	-0.325091	0.293885	-1.10619	0.268646	0.441642
CNAG_12698	1004.99	-0.325047	0.233342	-1.39301	0.163617	0.316526
CNAG_05644	1432.29	-0.324563	0.114511	-2.83434	0.00459211	0.0277837
CNAG_03686	795.686	-0.324508	0.172421	-1.88207	0.059826	0.157886
CNAG_03056	475.69	-0.324471	0.153664	-2.11156	0.0347242	0.106785
CNAG_01513	941.594	-0.324412	0.141879	-2.28654	0.0222225	0.0784614
CNAG_00784	56.8746	-0.324355	0.217435	-1.49173	0.13577	0.278049
CNAG_06805	19.6278	-0.32433	0.455853	-0.711478	0.476788	NA
CNAG_06594	11006.3	-0.32419	0.116168	-2.79071	0.00525928	0.030521
CNAG_04606	1154.86	-0.323793	0.217803	-1.48663	0.137112	0.279604
CNAG_03888	5937.25	-0.323654	0.0907449	-3.56663	0.000361599	0.0060657
CNAG_01602	3347.29	-0.323588	0.168484	-1.92059	0.0547831	0.148077
CNAG_06295	1308.05	-0.323488	0.106068	-3.04982	0.00228976	0.0179709
CNAG_13158	15.4464	-0.323378	0.443016	-0.729947	0.465422	NA
CNAG_01961	13338.7	-0.323151	0.13758	-2.34881	0.0188334	0.0704743
CNAG_06030	2138.69	-0.322894	0.200364	-1.61154	0.107062	0.236347
CNAG_12504	2.55961	-0.322524	0.378735	-0.851581	0.394447	NA
CNAG_09011	5.13046	-0.322294	0.484452	-0.665277	0.505874	NA
CNAG_07911	1698.47	-0.322278	0.211206	-1.52589	0.127036	0.265977
CNAG_01166	1626.28	-0.322095	0.179262	-1.79678	0.0723707	0.180742
CNAG_05758	1838.97	-0.32207	0.198436	-1.62305	0.104579	0.23246
CNAG_04111	3655.21	-0.321914	0.098914	-3.25449	0.00113598	0.0118242
CNAG_01834	2187.52	-0.321788	0.13124	-2.45192	0.0142098	0.0581282
CNAG_02684	77521.4	-0.32178	0.274175	-1.17363	0.240543	0.40952
CNAG_06646	37376	-0.321151	0.12612	-2.54639	0.0108843	0.0488137
CNAG_04437	1080.73	-0.320564	0.138597	-2.31293	0.0207265	0.0750436
CNAG_04676	20073.9	-0.320527	0.0804931	-3.98204	6.83252e-05	0.00248103
CNAG_02787	1906.66	-0.320369	0.1424	-2.24978	0.0244627	0.0833588
CNAG_01238	7896.27	-0.319932	0.131697	-2.4293	0.015128	0.0607062
CNAG_12183	692.364	-0.319894	0.339493	-0.94227	0.346054	0.525162
CNAG_04098	19949.3	-0.319656	0.208866	-1.53044	0.125908	0.26438
CNAG_06365	1162.22	-0.319573	0.129866	-2.4608	0.0138627	0.0574576
CNAG_12793	84.7148	-0.319463	0.394847	-0.80908	0.418469	0.593141
CNAG_01420	4429.98	-0.319449	0.182662	-1.74885	0.0803165	0.194677
CNAG_01567	1510.22	-0.319358	0.111231	-2.87112	0.00409019	0.0256838
CNAG_06431	1861.48	-0.318774	0.137372	-2.32052	0.020313	0.0740488
CNAG_05698	1789.88	-0.318497	0.135014	-2.35899	0.0183248	0.0692673
CNAG_02903	3244.87	-0.317961	0.0736405	-4.31774	1.57631e-05	0.00112163
CNAG_07108	7382.93	-0.317939	0.0960728	-3.30936	0.000935103	0.0104215
CNAG_00870	2749.78	-0.317353	0.272477	-1.1647	0.244142	0.413548
CNAG_06175	13693.9	-0.316749	0.0869436	-3.64315	0.000269322	0.00532229
CNAG_12005	312.975	-0.316711	0.206468	-1.53394	0.125044	0.263468
CNAG_00090	2057.08	-0.316538	0.125132	-2.52964	0.0114181	0.050407
CNAG_06527	106.957	-0.316327	0.240605	-1.31472	0.188605	0.347958
CNAG_04564	2322.53	-0.316039	0.112432	-2.81092	0.00493998	0.0291881
CNAG_01059	2772.93	-0.316002	0.159281	-1.98393	0.0472638	0.132796
CNAG_13170	95.5268	-0.315971	0.239908	-1.31705	0.187822	0.346683
CNAG_12561	363.324	-0.315692	0.154148	-2.04797	0.0405626	0.118706
CNAG_04291	4115.48	-0.315588	0.110145	-2.86521	0.00416728	0.0259567
CNAG_04122	1138.46	-0.315255	0.157452	-2.00222	0.0452606	0.128796
CNAG_12822	1104.21	-0.315167	0.278944	-1.12986	0.258537	0.430127
CNAG_06628	3689.57	-0.315057	0.132048	-2.38593	0.0170359	0.0657954
CNAG_03795	1292.23	-0.314454	0.182298	-1.72494	0.0845386	0.201606
CNAG_05081	2599.02	-0.314194	0.130575	-2.40624	0.0161176	0.0632169
CNAG_01399	1865.98	-0.314169	0.106254	-2.95678	0.00310871	0.0218532
CNAG_02422	3051.77	-0.314133	0.205974	-1.52511	0.127232	0.266142
CNAG_00744	5326.59	-0.313924	0.120416	-2.607	0.009134	0.0432207
CNAG_00816	6250.31	-0.313799	0.178024	-1.76268	0.0779551	0.190608
CNAG_01360	10504.3	-0.313515	0.114901	-2.72856	0.00636117	0.0341519
CNAG_04120	2556.68	-0.313485	0.0835047	-3.75411	0.00017396	0.00412443
CNAG_12155	7.78951	-0.313321	0.475826	-0.658479	0.51023	NA
CNAG_00960	8594.84	-0.313311	0.0946842	-3.30901	0.00093627	0.0104215
CNAG_02439	673.878	-0.31307	0.131164	-2.38685	0.0169933	0.0656955
CNAG_00713	4126.18	-0.313051	0.102133	-3.06512	0.00217585	0.0173759
CNAG_01173	4043.54	-0.313016	0.0991092	-3.1583	0.00158694	0.0142136
CNAG_03193	450.92	-0.312946	0.159221	-1.96548	0.0493589	0.136774
CNAG_06082	4.29271	-0.312672	0.442927	-0.705922	0.480237	NA
CNAG_04888	1142.91	-0.312308	0.203761	-1.53272	0.125344	0.263777
CNAG_03266	20041.7	-0.31167	0.0976159	-3.19282	0.00140889	0.0134801
CNAG_04110	1255.64	-0.311506	0.16592	-1.87745	0.0604559	0.158992
CNAG_04705	3344.75	-0.311412	0.170438	-1.82713	0.0676804	0.172163
CNAG_01019	13183.2	-0.311396	0.157979	-1.97112	0.0487102	0.135553
CNAG_02297	2894.35	-0.311217	0.275077	-1.13138	0.257896	0.429478
CNAG_03916	27143.9	-0.311158	0.0684468	-4.54599	5.46772e-06	0.000547964
CNAG_10050	0.602841	-0.310985	0.363197	-0.856245	0.391862	NA
CNAG_04498	2641.38	-0.310908	0.126784	-2.45227	0.0141957	0.0581282
CNAG_03638	8241.49	-0.310866	0.0967677	-3.2125	0.00131585	0.0129542
CNAG_10090	9.83467	-0.310838	0.4742	-0.655501	0.512145	NA
CNAG_01295	2111.85	-0.310504	0.207255	-1.49817	0.134089	0.276054
CNAG_12849	22.0795	-0.310025	0.368776	-0.840687	0.400523	NA
CNAG_01388	3551.55	-0.309985	0.0835084	-3.71203	0.000205607	0.00461847
CNAG_07450	672.057	-0.309918	0.19823	-1.56342	0.117953	0.252475
CNAG_07582	1516.13	-0.309676	0.105144	-2.94525	0.00322693	0.0223031
CNAG_07958	379.721	-0.309627	0.175183	-1.76745	0.0771521	0.189415
CNAG_12830	306.298	-0.309545	0.310037	-0.998412	0.318079	0.495234
CNAG_04503	816.039	-0.309492	0.184303	-1.67925	0.0931029	0.21564
CNAG_04913	3530.44	-0.309374	0.112071	-2.76052	0.00577101	0.0321911
CNAG_04973	5120.75	-0.308868	0.100014	-3.08824	0.00201346	0.0165157
CNAG_02843	32859.3	-0.308859	0.118149	-2.61414	0.00894513	0.0426887
CNAG_05266	948.614	-0.308717	0.277097	-1.11411	0.265231	0.437307
CNAG_00773	1156.76	-0.308663	0.146686	-2.10424	0.0353574	0.108049
CNAG_07639	3283.66	-0.308427	0.148699	-2.07416	0.038064	0.113915
CNAG_12529	241.965	-0.308199	0.195318	-1.57794	0.114579	0.247285
CNAG_07365	1883.3	-0.308187	0.106124	-2.90403	0.00368394	0.0242275
CNAG_05387	17077.1	-0.308085	0.207159	-1.48719	0.136965	0.279604
CNAG_02269	2240.87	-0.307889	0.101794	-3.02464	0.00248933	0.019115
CNAG_04017	4175.56	-0.307689	0.160202	-1.92064	0.0547775	0.148077
CNAG_06009	1903.98	-0.307243	0.162939	-1.88564	0.059344	0.157039
CNAG_07590	3479.73	-0.307198	0.140465	-2.18701	0.0287417	0.0932258
CNAG_12699	116.675	-0.306744	0.255052	-1.20267	0.229103	0.396536
CNAG_05074	7409.6	-0.306399	0.160579	-1.90809	0.0563796	0.151087
CNAG_02557	1666.68	-0.306382	0.174045	-1.76036	0.0783464	0.191147
CNAG_03306	2527.5	-0.30613	0.141079	-2.16992	0.0300128	0.0964284
CNAG_04620	1482.89	-0.305863	0.181565	-1.68459	0.0920671	0.21395
CNAG_04874	8863.44	-0.305188	0.202065	-1.51034	0.130956	0.271823
CNAG_07477	2753.96	-0.305024	0.151727	-2.01035	0.0443942	0.127164
CNAG_06598	53.161	-0.304785	0.365244	-0.834471	0.404016	0.58087
CNAG_01911	2019.07	-0.304782	0.125632	-2.42599	0.0152667	0.0610121
CNAG_02695	2575.98	-0.304741	0.08664	-3.51732	0.000435926	0.00678812
CNAG_03679	3506.59	-0.304619	0.212517	-1.43339	0.151747	0.300687
CNAG_05559	5344.74	-0.304391	0.0887688	-3.42903	0.000605737	0.00815386
CNAG_01456	214.943	-0.304226	0.254218	-1.19672	0.231417	0.399512
CNAG_04339	3823.08	-0.303649	0.0950966	-3.19306	0.00140773	0.0134801
CNAG_03069	2744.89	-0.303578	0.174223	-1.74247	0.0814269	0.196576
CNAG_07899	51.7199	-0.303538	0.433335	-0.70047	0.483634	0.650364
CNAG_05977	12883.9	-0.303424	0.144194	-2.10427	0.0353546	0.108049
CNAG_00016	2168.82	-0.303367	0.132439	-2.29062	0.0219853	0.0779806
CNAG_04998	580.448	-0.303321	0.113101	-2.68185	0.00732156	0.0374069
CNAG_12899	44.5486	-0.30326	0.34187	-0.887063	0.375045	0.553678
CNAG_12738	1360.77	-0.303213	0.337825	-0.897544	0.369429	0.548703
CNAG_06711	1940.42	-0.303064	0.0864847	-3.50424	0.000457906	0.0070048
CNAG_00855	1997.92	-0.303012	0.128292	-2.36189	0.0181818	0.0689292
CNAG_03395	2548.31	-0.302331	0.145796	-2.07365	0.0381114	0.11397
CNAG_06846	927.384	-0.302268	0.135989	-2.22273	0.0262339	0.0874126
CNAG_01492	19738.9	-0.302104	0.104785	-2.88308	0.00393806	0.0250683
CNAG_05683	51944.6	-0.301971	0.21797	-1.38538	0.165936	0.319646
CNAG_01910	1300.13	-0.301688	0.117362	-2.57058	0.0101527	0.0465478
CNAG_01945	150.585	-0.301148	0.364274	-0.826707	0.408403	0.584812
CNAG_12066	37.4664	-0.301011	0.431901	-0.696945	0.485837	0.651368
CNAG_00146	3471.79	-0.300577	0.0718779	-4.18177	2.89254e-05	0.00153969
CNAG_04786	5887.11	-0.300531	0.0865544	-3.47216	0.000516292	0.00743251
CNAG_04439	11956.9	-0.30051	0.0975415	-3.08085	0.00206414	0.0167365
CNAG_00482	5386.9	-0.299912	0.0737564	-4.06625	4.77759e-05	0.00206334
CNAG_00832	1076.23	-0.299889	0.122218	-2.45373	0.0141385	0.0579855
CNAG_01576	6687.49	-0.29976	0.122293	-2.45116	0.0142398	0.0582027
CNAG_12785	25.5525	-0.299509	0.438649	-0.682799	0.494734	0.659055
CNAG_04206	4791.39	-0.299428	0.186803	-1.60291	0.108955	0.239174
CNAG_00484	2480.01	-0.29917	0.177561	-1.68488	0.0920113	0.21395
CNAG_12216	223.543	-0.299027	0.219074	-1.36496	0.172267	0.327801
CNAG_12694	3.75905	-0.298773	0.485699	-0.61514	0.538463	NA
CNAG_13181	208.745	-0.298256	0.266662	-1.11848	0.263361	0.435426
CNAG_12518	245.33	-0.298176	0.277937	-1.07282	0.283352	0.45798
CNAG_05019	1051.8	-0.297548	0.150361	-1.97889	0.0478283	0.133861
CNAG_12182	168.988	-0.297234	0.262213	-1.13356	0.256979	0.428446
CNAG_00436	3816.82	-0.296857	0.0769859	-3.85599	0.000115262	0.00326451
CNAG_10501	3509.97	-0.296741	0.130021	-2.28225	0.0224744	0.0788959
CNAG_06299	3569.26	-0.296617	0.110032	-2.69572	0.00702361	0.0365536
CNAG_05601	2697.6	-0.296153	0.113364	-2.61241	0.00899057	0.042697
CNAG_03160	2986.83	-0.295945	0.129514	-2.28505	0.02231	0.0786283
CNAG_12282	48.6665	-0.29585	0.339091	-0.872482	0.382946	0.561524
CNAG_03242	1905.62	-0.295843	0.116895	-2.53084	0.0113791	0.0503061
CNAG_02575	10483.1	-0.295798	0.142412	-2.07706	0.0377958	0.113305
CNAG_00397	659.734	-0.295747	0.143533	-2.06047	0.0393535	0.116393
CNAG_12535	887.414	-0.295696	0.324996	-0.909844	0.362905	0.542518
CNAG_03608	560.471	-0.295529	0.144007	-2.05219	0.0401514	0.117994
CNAG_05784	1691.69	-0.295388	0.105831	-2.79112	0.00525254	0.0305045
CNAG_03364	1297.46	-0.295179	0.143511	-2.05684	0.0397014	0.1172
CNAG_06745	19740.8	-0.295124	0.1173	-2.51598	0.0118701	0.0517792
CNAG_00898	143.979	-0.294673	0.391648	-0.752391	0.451816	0.621147
CNAG_02146	8.91503	-0.294484	0.453852	-0.648854	0.516433	NA
CNAG_12085	56.4816	-0.29447	0.253001	-1.1639	0.244463	0.413796
CNAG_05336	3191.37	-0.29391	0.130819	-2.2467	0.0246594	0.0839192
CNAG_03224	187.903	-0.293846	0.183536	-1.60103	0.109371	0.239684
CNAG_12707	245.818	-0.2936	0.359159	-0.817466	0.413662	0.588662
CNAG_05737	3346.73	-0.293373	0.123555	-2.37443	0.0175758	0.0674143
CNAG_06726	1747.01	-0.292979	0.13647	-2.14684	0.0318061	0.100375
CNAG_03796	4883.18	-0.29296	0.132721	-2.20733	0.0272908	0.0899448
CNAG_13015	874.299	-0.292818	0.150989	-1.93933	0.0524616	0.143289
CNAG_12436	15.1818	-0.292795	0.471854	-0.62052	0.534915	NA
CNAG_02377	4572.48	-0.29272	0.110304	-2.65376	0.00796001	0.0394187
CNAG_00072	5823.17	-0.292187	0.144598	-2.02068	0.0433133	0.124845
CNAG_06501	5990.44	-0.292183	0.155501	-1.87898	0.0602475	0.158668
CNAG_03978	3863.9	-0.291851	0.106346	-2.74436	0.00606289	0.0330499
CNAG_01213	4185.75	-0.291819	0.0697045	-4.18651	2.8328e-05	0.00153525
CNAG_12213	23.4975	-0.291609	0.354162	-0.823378	0.410293	NA
CNAG_01445	1438.64	-0.291448	0.113846	-2.56001	0.0104668	0.0474865
CNAG_01823	6118.65	-0.291413	0.11567	-2.51935	0.0117571	0.0514297
CNAG_00061	40436.8	-0.291003	0.0620651	-4.68867	2.74985e-06	0.000338176
CNAG_13124	549.179	-0.290887	0.168062	-1.73084	0.0834811	0.19993
CNAG_00012	4121.28	-0.290858	0.127967	-2.27291	0.0230316	0.0802528
CNAG_00581	47163.8	-0.290714	0.146622	-1.98274	0.0473967	0.132986
CNAG_01514	5.72303	-0.289845	0.441114	-0.657077	0.511132	NA
CNAG_06098	3272.1	-0.289417	0.188596	-1.53459	0.124884	0.263202
CNAG_01796	10342.1	-0.289201	0.176667	-1.63698	0.101634	0.228484
CNAG_04022	6419.09	-0.288983	0.0758489	-3.80998	0.000138978	0.0036952
CNAG_04032	14427.7	-0.28898	0.0702966	-4.11087	3.94177e-05	0.00191244
CNAG_12495	1.85106	-0.287931	0.461259	-0.624227	0.532478	NA
CNAG_04740	4531.77	-0.287918	0.108322	-2.65798	0.00786114	0.0392436
CNAG_07655	8.60531	-0.287751	0.451783	-0.636924	0.524174	NA
CNAG_06794	1887.8	-0.287473	0.159696	-1.80013	0.0718406	0.17988
CNAG_12108	288.802	-0.287114	0.196275	-1.46282	0.143518	0.288623
CNAG_02400	4461	-0.286773	0.083762	-3.42367	0.000617821	0.00822745
CNAG_00410	7798.99	-0.286632	0.0736404	-3.89233	9.92869e-05	0.00309275
CNAG_00438	535.705	-0.286548	0.206184	-1.38977	0.164599	0.317662
CNAG_03025	2731.76	-0.28644	0.134899	-2.12336	0.0337237	0.104486
CNAG_03742	8725.15	-0.286417	0.0767895	-3.7299	0.000191554	0.00439615
CNAG_05099	44.8221	-0.285967	0.347112	-0.823847	0.410026	0.585728
CNAG_02799	4402.68	-0.285798	0.0955579	-2.99084	0.00278211	0.0204892
CNAG_01006	1080.55	-0.28575	0.103519	-2.76037	0.00577355	0.0321911
CNAG_03202	7201.74	-0.285215	0.158861	-1.79538	0.0725937	0.180967
CNAG_12847	8.78965	-0.285108	0.478565	-0.595756	0.551338	NA
CNAG_02143	2243.75	-0.285107	0.189221	-1.50674	0.131876	0.272921
CNAG_07369	207.081	-0.284715	0.231353	-1.23065	0.218453	0.38349
CNAG_13066	69.6901	-0.284694	0.345987	-0.822846	0.410596	0.586019
CNAG_13021	2464.74	-0.284618	0.188914	-1.5066	0.131912	0.272921
CNAG_07336	235.031	-0.284302	0.19119	-1.48701	0.137011	0.279604
CNAG_01241	2346.82	-0.284255	0.121948	-2.33096	0.0197557	0.0730167
CNAG_02723	3050.36	-0.284248	0.0867543	-3.27647	0.00105115	0.0112405
CNAG_03805	6121.41	-0.284229	0.10611	-2.67862	0.0073926	0.0375979
CNAG_05313	5806.76	-0.283941	0.200587	-1.41555	0.156907	0.307712
CNAG_01849	209.016	-0.283919	0.169828	-1.6718	0.0945629	0.218181
CNAG_05569	946.936	-0.283904	0.154998	-1.83167	0.0670013	0.170936
CNAG_03133	1238.24	-0.283895	0.0904364	-3.13917	0.0016943	0.0148312
CNAG_02311	55.7899	-0.283668	0.28345	-1.00077	0.31694	0.494547
CNAG_01601	3934.85	-0.283642	0.231688	-1.22424	0.220862	0.386669
CNAG_08015	165.965	-0.282939	0.249246	-1.13518	0.256299	0.427822
CNAG_00682	13668.5	-0.282891	0.163859	-1.72642	0.0842713	0.201206
CNAG_04059	381.272	-0.282784	0.278034	-1.01709	0.309112	0.48589
CNAG_02360	4481.26	-0.282696	0.115292	-2.45199	0.0142067	0.0581282
CNAG_00445	5265.37	-0.282582	0.121637	-2.32316	0.0201704	0.0738856
CNAG_04880	1809.42	-0.282185	0.13558	-2.08131	0.0374052	0.112468
CNAG_02713	305.983	-0.281928	0.121431	-2.32172	0.020248	0.0740488
CNAG_04194	7295.49	-0.281761	0.0928054	-3.03604	0.00239705	0.0185813
CNAG_02459	3473.88	-0.281181	0.13533	-2.07774	0.0377334	0.113273
CNAG_03652	1428.52	-0.281114	0.170873	-1.64516	0.0999361	0.225996
CNAG_05134	7294.63	-0.281108	0.0882067	-3.18693	0.00143793	0.0135743
CNAG_06473	6824.42	-0.281083	0.108682	-2.58629	0.00970165	0.0450076
CNAG_12157	74.1398	-0.280943	0.468883	-0.599175	0.549056	0.706151
CNAG_06485	840.577	-0.280776	0.150197	-1.86938	0.0615698	0.160874
CNAG_04530	4069.13	-0.280579	0.104529	-2.68422	0.00726997	0.0373141
CNAG_00996	10420.2	-0.280557	0.0758179	-3.7004	0.000215259	0.00473724
CNAG_05608	2842.84	-0.28048	0.200792	-1.39687	0.162452	0.314953
CNAG_13112	12.6513	-0.280159	0.468795	-0.597614	0.550098	NA
CNAG_03217	2464.59	-0.280126	0.0974123	-2.87567	0.00403166	0.0254851
CNAG_01918	2525.99	-0.279787	0.159624	-1.75279	0.0796375	0.193331
CNAG_07589	315.937	-0.279213	0.169031	-1.65184	0.0985673	0.224106
CNAG_01569	1478.01	-0.27881	0.112567	-2.47684	0.0132552	0.0556478
CNAG_01046	6095.68	-0.278805	0.090878	-3.0679	0.00215565	0.0172474
CNAG_00671	4973.88	-0.278221	0.0764944	-3.63714	0.000275683	0.0054146
CNAG_12398	11.4472	-0.278199	0.436184	-0.637803	0.523602	NA
CNAG_06904	1122.86	-0.278109	0.164347	-1.69221	0.0906058	0.211675
CNAG_06894	0.724154	-0.277699	0.374876	-0.740775	0.45883	NA
CNAG_00528	1989.52	-0.277476	0.129667	-2.13991	0.0323623	0.101638
CNAG_06484	667.054	-0.27736	0.175366	-1.5816	0.11374	0.24615
CNAG_01653	26315.3	-0.27734	0.297734	-0.931502	0.351594	0.530889
CNAG_00676	1282.5	-0.277206	0.149135	-1.85876	0.0630619	0.163357
CNAG_05686	5833.09	-0.276905	0.230622	-1.20069	0.229871	0.397606
CNAG_12787	312.167	-0.276749	0.227669	-1.21557	0.224147	0.390235
CNAG_00999	2287.6	-0.276713	0.0991242	-2.79158	0.00524519	0.0304845
CNAG_06900	23988.1	-0.276646	0.108438	-2.55119	0.0107357	0.0483745
CNAG_00892	378.788	-0.276609	0.23572	-1.17347	0.240609	0.40952
CNAG_12026	76.5543	-0.276544	0.319562	-0.865385	0.386827	0.565413
CNAG_02859	1555.18	-0.276321	0.125237	-2.20638	0.0273575	0.0900815
CNAG_04217	6298.51	-0.276301	0.25476	-1.08456	0.278119	0.452456
CNAG_13096	93.7856	-0.276266	0.330048	-0.837048	0.402565	0.579531
CNAG_03663	1597.04	-0.276186	0.104562	-2.64137	0.00825719	0.0405207
CNAG_05931	4151.6	-0.27603	0.160931	-1.71521	0.0863072	0.204403
CNAG_00011	2971.13	-0.275978	0.208162	-1.32578	0.184911	0.343012
CNAG_05715	1674.52	-0.275465	0.112487	-2.44886	0.0143308	0.0583254
CNAG_07747	3657.58	-0.275454	0.131158	-2.10017	0.0357143	0.108884
CNAG_12505	65.4771	-0.275214	0.353046	-0.779542	0.435661	0.60857
CNAG_04014	7005.74	-0.275104	0.0718556	-3.82856	0.000128894	0.00348639
CNAG_05743	738.459	-0.275103	0.221869	-1.23993	0.215	0.379548
CNAG_03988	963.162	-0.274986	0.146686	-1.87466	0.0608397	0.159679
CNAG_03519	252.149	-0.274825	0.235198	-1.16848	0.242612	0.411566
CNAG_00639	1062.48	-0.274659	0.154477	-1.778	0.0754042	0.186118
CNAG_00461	7091.67	-0.274641	0.12691	-2.16405	0.0304602	0.0973856
CNAG_05638	5165.39	-0.274627	0.0923894	-2.9725	0.0029539	0.0212015
CNAG_03875	1853.36	-0.274381	0.114661	-2.39297	0.0167125	0.0648669
CNAG_02976	2514.76	-0.274328	0.122187	-2.24515	0.0247588	0.084111
CNAG_02046	12699.3	-0.274228	0.105394	-2.60192	0.00927032	0.0435791
CNAG_02207	1576.27	-0.274152	0.120375	-2.27749	0.0227572	0.0796655
CNAG_03808	4726.72	-0.273687	0.106364	-2.5731	0.0100792	0.046298
CNAG_13157	108.874	-0.273612	0.45565	-0.600488	0.548181	0.705487
CNAG_05684	14828	-0.273562	0.138123	-1.98057	0.0476391	0.133523
CNAG_12239	58.5774	-0.273465	0.355206	-0.769877	0.441373	0.613937
CNAG_07901	7117.14	-0.273401	0.108105	-2.52903	0.0114378	0.0504567
CNAG_04296	431.666	-0.272877	0.330323	-0.82609	0.408753	0.584992
CNAG_08025	3975.5	-0.272732	0.135435	-2.01374	0.0440368	0.126464
CNAG_12286	1061.68	-0.272641	0.118763	-2.29566	0.0216951	0.0774033
CNAG_00474	1560.01	-0.271726	0.213791	-1.27099	0.203733	0.366412
CNAG_06136	1085.11	-0.271622	0.143903	-1.88754	0.0590882	0.156627
CNAG_05041	6122.19	-0.271554	0.112015	-2.42427	0.0153392	0.0612348
CNAG_12589	3.26091	-0.271474	0.485768	-0.558856	0.57626	NA
CNAG_04188	5469	-0.271335	0.163294	-1.66163	0.0965861	0.22143
CNAG_00456	64455.9	-0.27133	0.202122	-1.34241	0.179463	0.336337
CNAG_02203	1993.22	-0.271271	0.144562	-1.8765	0.0605862	0.159194
CNAG_05345	85.2781	-0.270653	0.35449	-0.763499	0.445166	0.617106
CNAG_00778	8641.33	-0.270437	0.0928399	-2.91294	0.00358047	0.0237392
CNAG_05120	4085.27	-0.270216	0.0835753	-3.23321	0.00122408	0.012334
CNAG_12743	27.3562	-0.270188	0.386487	-0.699087	0.484498	0.650742
CNAG_07333	8084	-0.269889	0.131327	-2.05509	0.0398703	0.117465
CNAG_05113	4095.7	-0.269867	0.0773083	-3.49079	0.000481593	0.00714883
CNAG_05440	1390.24	-0.269702	0.117307	-2.29912	0.0214983	0.0768767
CNAG_05522	13126.9	-0.269635	0.0874308	-3.08398	0.00204249	0.0166314
CNAG_02030	36361.3	-0.269309	0.16552	-1.62705	0.103726	0.231533
CNAG_00911	51.702	-0.269281	0.354037	-0.760602	0.446895	0.617532
CNAG_05308	5701.3	-0.269266	0.116402	-2.31324	0.0207097	0.0750174
CNAG_01162	1490.75	-0.269198	0.137707	-1.95486	0.0505996	0.13947
CNAG_05919	1932.31	-0.268694	0.115669	-2.32296	0.0201813	0.0738911
CNAG_07588	41.0784	-0.268575	0.350772	-0.765666	0.443875	0.616079
CNAG_02500	15399.5	-0.268424	0.092009	-2.91737	0.00352998	0.0236288
CNAG_05992	569.506	-0.26821	0.199997	-1.34107	0.179899	0.337004
CNAG_02596	41.3942	-0.268198	0.386984	-0.693046	0.488281	0.653353
CNAG_03108	2579.55	-0.267946	0.104285	-2.56936	0.0101886	0.04663
CNAG_01036	1322.28	-0.267805	0.120842	-2.21617	0.0266802	0.0884848
CNAG_12742	53.915	-0.267741	0.365266	-0.733003	0.463557	0.631481
CNAG_05747	2667.68	-0.267507	0.110182	-2.42788	0.0151876	0.0608203
CNAG_07671	940.607	-0.2675	0.16099	-1.66159	0.0965942	0.22143
CNAG_12241	1.46608	-0.267248	0.415255	-0.643576	0.51985	NA
CNAG_02284	1430.36	-0.266891	0.139077	-1.91902	0.0549819	0.148512
CNAG_01914	2517.48	-0.266722	0.128943	-2.06853	0.0385899	0.115092
CNAG_04947	265.358	-0.266608	0.141589	-1.88297	0.0597045	0.157619
CNAG_04466	1905.55	-0.266321	0.183656	-1.45011	0.147029	0.293304
CNAG_12170	26.629	-0.266017	0.431706	-0.616198	0.537764	0.6969
CNAG_04458	1980	-0.265801	0.125548	-2.11712	0.0342497	0.105738
CNAG_00750	1961.95	-0.265684	0.124364	-2.13635	0.0326511	0.102134
CNAG_06614	9765.13	-0.265387	0.167537	-1.58405	0.113182	0.24515
CNAG_12994	725.804	-0.265352	0.226185	-1.17317	0.240729	0.409527
CNAG_05033	4193.63	-0.265323	0.103049	-2.57472	0.0100322	0.0461847
CNAG_04105	74578.2	-0.265122	0.276468	-0.958959	0.337579	0.516714
CNAG_02175	5687.87	-0.264993	0.0944172	-2.80662	0.00500639	0.0294913
CNAG_05090	7219.3	-0.264989	0.138848	-1.90847	0.0563299	0.151005
CNAG_07680	1271.65	-0.264869	0.0884229	-2.99547	0.00274018	0.0202457
CNAG_00749	239.746	-0.264683	0.356111	-0.743261	0.457324	0.625967
CNAG_06332	4400.64	-0.264672	0.110104	-2.40384	0.016224	0.0634597
CNAG_03684	7865.41	-0.264341	0.0767555	-3.44394	0.000573304	0.0078621
CNAG_04229	2401.8	-0.264241	0.121646	-2.17221	0.0298399	0.0959912
CNAG_01627	2785.43	-0.264011	0.0872299	-3.02661	0.0024731	0.0190523
CNAG_03464	556.626	-0.263947	0.152102	-1.73533	0.082682	0.198442
CNAG_02295	696.619	-0.26379	0.115306	-2.28774	0.0221528	0.0783214
CNAG_02112	1457.31	-0.263569	0.20926	-1.25953	0.207839	0.370508
CNAG_12292	412.445	-0.263559	0.218498	-1.20623	0.227728	0.394799
CNAG_06836	431.863	-0.263533	0.207108	-1.27245	0.203214	0.365851
CNAG_07622	3406.2	-0.263319	0.12341	-2.1337	0.0328675	0.102524
CNAG_00978	3405.66	-0.263264	0.13153	-2.00155	0.0453328	0.128904
CNAG_02035	42334.3	-0.26319	0.146085	-1.80163	0.071604	0.17963
CNAG_01423	4462.94	-0.26305	0.0755728	-3.48074	0.000500022	0.00730592
CNAG_06437	4609.31	-0.263011	0.119961	-2.19246	0.028346	0.0923253
CNAG_06450	4922.59	-0.262983	0.0780503	-3.3694	0.000753323	0.00928171
CNAG_03174	738.561	-0.262897	0.150083	-1.75167	0.07983	0.193738
CNAG_05741	2558.08	-0.262732	0.100317	-2.61901	0.00881841	0.0423165
CNAG_07853	238.422	-0.262715	0.280586	-0.936307	0.349115	0.528882
CNAG_02510	8988.23	-0.262686	0.148995	-1.76306	0.0778911	0.190571
CNAG_13136	99.4648	-0.262554	0.330521	-0.794364	0.426983	0.600959
CNAG_04904	29227.6	-0.262543	0.0609752	-4.30574	1.6643e-05	0.00114122
CNAG_06219	3612.69	-0.262496	0.0977628	-2.68502	0.00725245	0.0373141
CNAG_06027	167.895	-0.262337	0.266656	-0.983804	0.325212	0.502905
CNAG_01001	913.862	-0.262234	0.167161	-1.56875	0.116706	0.250403
CNAG_00972	2965.63	-0.261889	0.124027	-2.11155	0.0347254	0.106785
CNAG_02659	145.283	-0.261542	0.372709	-0.701732	0.482846	0.649671
CNAG_06236	2719.43	-0.261402	0.084421	-3.09641	0.00195882	0.0162871
CNAG_04974	1465.5	-0.261306	0.197334	-1.32419	0.185442	0.343751
CNAG_02681	3534.13	-0.261249	0.115825	-2.25556	0.0240983	0.0826249
CNAG_12633	1444.72	-0.261079	0.153043	-1.70592	0.0880231	0.207233
CNAG_07893	1198.76	-0.261055	0.106668	-2.44737	0.0143903	0.058484
CNAG_02920	2692.17	-0.260996	0.0657029	-3.97236	7.11627e-05	0.00250981
CNAG_03681	5614.4	-0.260752	0.0896381	-2.90894	0.0036266	0.0239435
CNAG_03523	1088.98	-0.260338	0.124074	-2.09825	0.035883	0.109101
CNAG_08011	503.017	-0.260091	0.193309	-1.34547	0.178475	0.335208
CNAG_04626	615.274	-0.259601	0.222153	-1.16857	0.242576	0.411566
CNAG_01512	1910.23	-0.259367	0.113013	-2.29503	0.0217316	0.0774982
CNAG_07923	150.375	-0.259277	0.251351	-1.03154	0.30229	0.478146
CNAG_12637	9.14296	-0.25882	0.472475	-0.547796	0.583832	NA
CNAG_12668	310.729	-0.258497	0.222116	-1.16379	0.244508	0.413796
CNAG_12135	572.367	-0.258472	0.184198	-1.40323	0.160549	0.312562
CNAG_03272	808.93	-0.258088	0.153188	-1.68478	0.0920313	0.21395
CNAG_02173	1149.99	-0.257945	0.0978216	-2.63689	0.00836706	0.0408481
CNAG_00055	2861.97	-0.257675	0.082664	-3.11713	0.00182621	0.0156016
CNAG_07515	380.531	-0.257561	0.192332	-1.33915	0.180523	0.337882
CNAG_12527	110.285	-0.257369	0.215938	-1.19186	0.233314	0.401634
CNAG_03279	886.047	-0.257344	0.118353	-2.17438	0.0296763	0.0956224
CNAG_02326	13025.1	-0.257318	0.0897899	-2.86578	0.00415983	0.0259567
CNAG_01210	80.8568	-0.257297	0.296345	-0.868237	0.385265	0.564103
CNAG_03494	2412.7	-0.257293	0.0794455	-3.23861	0.00120114	0.0122576
CNAG_01933	21.1004	-0.256394	0.367486	-0.697697	0.485367	NA
CNAG_12127	250.451	-0.256251	0.322842	-0.793737	0.427349	0.601366
CNAG_05898	909.537	-0.256234	0.140601	-1.82242	0.068392	0.173691
CNAG_05532	1159.74	-0.255938	0.14129	-1.81144	0.0700728	0.177097
CNAG_05142	1987.36	-0.255806	0.119566	-2.13946	0.0323981	0.101689
CNAG_02308	1936.2	-0.255559	0.161307	-1.5843	0.113126	0.245096
CNAG_02169	524.217	-0.255413	0.215058	-1.18765	0.234973	0.403868
CNAG_02929	4142.58	-0.25535	0.0728594	-3.5047	0.000457123	0.0070048
CNAG_01502	4408.06	-0.255143	0.126964	-2.00957	0.0444768	0.12718
CNAG_00523	1513.05	-0.25482	0.12772	-1.99515	0.0460263	0.130264
CNAG_05123	2342.09	-0.254692	0.0876344	-2.90629	0.00365737	0.0241263
CNAG_12967	2137.03	-0.254455	0.254318	-1.00054	0.317049	0.494547
CNAG_02861	828.967	-0.254282	0.152229	-1.67039	0.0948431	0.218516
CNAG_07719	9067.35	-0.254221	0.0717356	-3.54387	0.000394302	0.00638149
CNAG_02569	1218.85	-0.25398	0.124886	-2.03369	0.0419825	0.121637
CNAG_03899	9514.26	-0.253909	0.107122	-2.37029	0.0177742	0.0679828
CNAG_04663	3491.03	-0.253788	0.147663	-1.71869	0.0856705	0.203428
CNAG_06639	7803.88	-0.25357	0.0828238	-3.06156	0.00220187	0.0175454
CNAG_01050	1424.6	-0.252982	0.134269	-1.88414	0.0595458	0.15736
CNAG_07353	76.3261	-0.25296	0.232247	-1.08918	0.276073	0.450577
CNAG_05216	4923.73	-0.252941	0.109013	-2.32029	0.020325	0.0740488
CNAG_03213	9470.45	-0.252911	0.125616	-2.01337	0.0440756	0.126529
CNAG_06673	5494.63	-0.252904	0.0910766	-2.77682	0.00548933	0.0312092
CNAG_02708	1929.83	-0.252874	0.13641	-1.85378	0.0637701	0.164573
CNAG_03046	1721.74	-0.252738	0.250363	-1.00949	0.312741	0.489624
CNAG_00665	8525.42	-0.252688	0.0814189	-3.10355	0.00191215	0.016107
CNAG_04065	359.721	-0.252631	0.14646	-1.72492	0.0845419	0.201606
CNAG_00673	3218.15	-0.252614	0.108866	-2.32042	0.0203183	0.0740488
CNAG_12161	531.669	-0.252539	0.221755	-1.13882	0.254777	0.4261
CNAG_00967	2280.99	-0.252502	0.135184	-1.86785	0.0617834	0.161202
CNAG_06592	3934.71	-0.252232	0.130162	-1.93783	0.0526444	0.143688
CNAG_04665	1010.81	-0.252192	0.122293	-2.0622	0.0391892	0.116082
CNAG_06293	783.378	-0.25148	0.165751	-1.51721	0.129213	0.269566
CNAG_05180	6267.8	-0.251277	0.140492	-1.78854	0.0736885	0.182981
CNAG_02883	5239.22	-0.251218	0.149975	-1.67506	0.093922	0.217151
CNAG_12222	235.029	-0.250805	0.239886	-1.04552	0.295784	0.471963
CNAG_04257	4947.23	-0.250694	0.0782106	-3.20537	0.00134891	0.0131566
CNAG_00466	1002.37	-0.250533	0.196802	-1.27302	0.20301	0.365652
CNAG_04168	6195.79	-0.250224	0.0788588	-3.17307	0.00150839	0.0138763
CNAG_02865	1985.25	-0.249962	0.178493	-1.40041	0.161392	0.313519
CNAG_01764	2578.81	-0.249786	0.0956583	-2.61123	0.00902167	0.0427408
CNAG_05315	937.923	-0.249499	0.129024	-1.93374	0.0531449	0.144844
CNAG_04406	1610.73	-0.249274	0.136424	-1.8272	0.0676695	0.172163
CNAG_06153	9475.58	-0.249254	0.0714222	-3.48986	0.000483269	0.00715476
CNAG_05162	759.293	-0.249194	0.14769	-1.68728	0.09155	0.213341
CNAG_00503	3856.28	-0.24906	0.142041	-1.75343	0.0795279	0.193245
CNAG_03092	3011.46	-0.248945	0.0718841	-3.46315	0.000533893	0.00756058
CNAG_00612	2280.14	-0.248673	0.129862	-1.9149	0.0555052	0.149358
CNAG_12670	251.823	-0.248368	0.166849	-1.48858	0.136599	0.279162
CNAG_02055	3815.9	-0.248034	0.149379	-1.66044	0.0968264	0.221702
CNAG_04252	2410.75	-0.247987	0.105701	-2.34612	0.0189699	0.0708156
CNAG_01614	2656.61	-0.247906	0.0939888	-2.63761	0.00834922	0.0408422
CNAG_05726	2129.86	-0.247886	0.0973117	-2.54734	0.0108549	0.0487658
CNAG_00079	786.556	-0.247836	0.302025	-0.82058	0.411885	0.587239
CNAG_12050	129.077	-0.247828	0.264963	-0.93533	0.349618	0.529337
CNAG_06296	649.895	-0.247586	0.204629	-1.20993	0.226308	0.393209
CNAG_02924	5732.31	-0.247579	0.162312	-1.52533	0.127176	0.266142
CNAG_12762	999.626	-0.247318	0.242397	-1.0203	0.307587	0.483915
CNAG_03280	1493	-0.247126	0.108383	-2.28012	0.0226007	0.079224
CNAG_03533	2721.49	-0.247086	0.10561	-2.3396	0.0193045	0.0717562
CNAG_02468	3659.73	-0.246862	0.0922734	-2.67533	0.00746553	0.0377478
CNAG_05734	7977.88	-0.246453	0.151391	-1.62793	0.103541	0.231383
CNAG_01040	1150.75	-0.24641	0.215622	-1.14279	0.253128	0.424159
CNAG_01457	3545.22	-0.246065	0.109673	-2.24363	0.0248565	0.08426
CNAG_04763	7284.86	-0.246054	0.106787	-2.30415	0.021214	0.0762807
CNAG_12567	73.4729	-0.245936	0.23314	-1.05488	0.291479	0.467274
CNAG_03924	525.214	-0.245775	0.181781	-1.35204	0.176363	0.332259
CNAG_04388	36326	-0.245388	0.211222	-1.16176	0.245335	0.414745
CNAG_00138	4665.67	-0.245251	0.13682	-1.79251	0.0730505	0.181743
CNAG_01982	4737.17	-0.245	0.148808	-1.64642	0.0996774	0.225587
CNAG_04219	5517.35	-0.244996	0.158444	-1.54626	0.122042	0.258747
CNAG_00587	1266.86	-0.24499	0.28702	-0.853565	0.393346	0.571628
CNAG_05002	66.9005	-0.244826	0.398957	-0.613665	0.539437	0.698142
CNAG_03722	12988.7	-0.244692	0.0784703	-3.11828	0.00181909	0.0155601
CNAG_06863	3338.2	-0.24469	0.129029	-1.8964	0.0579069	0.154333
CNAG_10052	4.46162	-0.244676	0.478434	-0.511411	0.609063	NA
CNAG_04916	376.543	-0.244667	0.226571	-1.07987	0.280202	0.454804
CNAG_04285	3949.74	-0.244565	0.097547	-2.50715	0.0121708	0.0525049
CNAG_03562	1283.22	-0.244476	0.116039	-2.10684	0.0351318	0.107739
CNAG_04392	1536.4	-0.244437	0.186138	-1.31321	0.189113	0.348301
CNAG_05845	5121.11	-0.244141	0.102341	-2.38556	0.0170532	0.0657994
CNAG_05543	435.915	-0.244049	0.192235	-1.26953	0.204251	0.366752
CNAG_02078	4747.46	-0.244045	0.124327	-1.96292	0.0496554	0.1374
CNAG_07987	613.622	-0.243962	0.177249	-1.37638	0.168706	0.323625
CNAG_06849	8821.11	-0.243895	0.0841711	-2.89762	0.00376012	0.0244952
CNAG_07331	389.575	-0.243855	0.195651	-1.24638	0.212626	0.376296
CNAG_00589	2336.89	-0.243755	0.116531	-2.09176	0.0364598	0.110382
CNAG_10018	1.89239	-0.243658	0.439083	-0.554925	0.578946	NA
CNAG_02418	9533.95	-0.243569	0.0927708	-2.62549	0.00865249	0.0418284
CNAG_05301	10235	-0.243477	0.0741151	-3.28512	0.00101938	0.0110367
CNAG_04563	3599.14	-0.243342	0.140134	-1.7365	0.082475	0.19831
CNAG_04143	161.745	-0.243315	0.286524	-0.849197	0.395772	0.574166
CNAG_06944	1176.61	-0.243068	0.111975	-2.17073	0.0299512	0.09627
CNAG_02701	636.293	-0.243034	0.301495	-0.806097	0.420187	0.594985
CNAG_06968	1329.59	-0.242742	0.158685	-1.52971	0.126089	0.264552
CNAG_03558	1704.13	-0.242525	0.19686	-1.23197	0.217961	0.383049
CNAG_03600	1054.24	-0.242445	0.121888	-1.98908	0.0466922	0.131529
CNAG_06370	5523.67	-0.242362	0.10941	-2.21516	0.0267488	0.0886372
CNAG_13040	1939.6	-0.242348	0.270845	-0.894785	0.370902	0.54998
CNAG_12083	1008.07	-0.242343	0.133823	-1.81093	0.0701517	0.177238
CNAG_05650	20455.2	-0.242312	0.096666	-2.5067	0.0121865	0.0525164
CNAG_00274	2718.97	-0.2422	0.0919687	-2.6335	0.008451	0.0411342
CNAG_06374	1405.03	-0.241088	0.24149	-0.998338	0.318116	0.495234
CNAG_00756	1151.22	-0.240722	0.110602	-2.17646	0.0295207	0.0951994
CNAG_01675	2283.45	-0.240467	0.13787	-1.74415	0.0811328	0.196048
CNAG_00614	756.843	-0.240296	0.241208	-0.996218	0.319144	0.49635
CNAG_03396	2350.73	-0.240201	0.0730591	-3.28776	0.00100988	0.0109795
CNAG_03588	15194.6	-0.239843	0.0940138	-2.55115	0.0107368	0.0483745
CNAG_04041	2373.75	-0.239269	0.134466	-1.7794	0.0751738	0.185741
CNAG_04262	1116.97	-0.239196	0.172809	-1.38417	0.166308	0.320204
CNAG_00875	1283.2	-0.238748	0.0986626	-2.41984	0.0155274	0.0616757
CNAG_04337	315.446	-0.238105	0.190041	-1.25291	0.210237	0.373678
CNAG_02240	7588.21	-0.238063	0.0967633	-2.46026	0.0138836	0.0574831
CNAG_13207	63.8162	-0.237913	0.26353	-0.902792	0.366636	0.545835
CNAG_02108	2089.9	-0.237662	0.117695	-2.0193	0.0434562	0.125165
CNAG_12115	6.17166	-0.237486	0.472214	-0.50292	0.61502	NA
CNAG_02525	587.584	-0.237383	0.228332	-1.03964	0.298507	0.47434
CNAG_05183	3098.82	-0.237066	0.0847271	-2.798	0.005142	0.0300861
CNAG_13104	263.373	-0.236992	0.186299	-1.27211	0.203335	0.365984
CNAG_04364	10881.5	-0.23694	0.0642385	-3.68844	0.000225634	0.0048731
CNAG_01896	61552.2	-0.23674	0.146021	-1.62127	0.104959	0.233021
CNAG_00493	4491.35	-0.236622	0.158892	-1.4892	0.136434	0.278972
CNAG_01689	260.504	-0.236592	0.172326	-1.37293	0.169773	0.324955
CNAG_12705	17.5785	-0.23597	0.421517	-0.559811	0.575609	NA
CNAG_00462	3875.11	-0.235922	0.112107	-2.10444	0.0353401	0.108049
CNAG_04851	39481.6	-0.2359	0.0503278	-4.68727	2.76874e-06	0.000338176
CNAG_03892	13821.8	-0.235825	0.108103	-2.18149	0.0291471	0.094189
CNAG_02878	1882.03	-0.23562	0.0832085	-2.83168	0.00463038	0.0278862
CNAG_07799	7726.59	-0.235551	0.204754	-1.15041	0.249976	0.421043
CNAG_07692	4537.27	-0.235499	0.128604	-1.8312	0.0670701	0.171056
CNAG_03599	1325.32	-0.235467	0.0961633	-2.44861	0.0143407	0.0583254
CNAG_00266	2111.75	-0.235045	0.185428	-1.26758	0.204949	0.367367
[truncated: 6,339 more rows]

## Sheet: 24_hour_C02_vs_Amb
CNAG_XXXXX	baseMean	log2FoldChange	lfcSE	stat	pvalue	padj
CNAG_05278	97.2932	-3.2868	0.354973	-9.2593	2.05779e-20	4.06071e-18
CNAG_05075	26942.1	-3.12581	0.37688	-8.29391	1.09583e-16	1.08122e-14
CNAG_01995	834.241	-2.58415	0.378111	-6.83436	8.23713e-12	2.67723e-10
CNAG_12187	1510.99	-2.39561	0.164341	-14.5771	3.92829e-48	8.13942e-45
CNAG_02083	18555.8	-2.1372	0.193571	-11.0409	2.42519e-28	1.34e-25
CNAG_00128	3086.75	-2.13686	0.255929	-8.34941	6.86038e-17	7.19732e-15
CNAG_05853	1574.83	-2.13553	0.319615	-6.68156	2.36416e-11	7.12514e-10
CNAG_12934	298.338	-1.98985	0.262587	-7.57785	3.51331e-14	2.17301e-12
CNAG_01105	6263.02	-1.86046	0.292828	-6.3534	2.10601e-10	5.0157e-09
CNAG_05565	1654.33	-1.83303	0.355852	-5.15111	2.58947e-07	2.69596e-06
CNAG_02406	3491.85	-1.83063	0.258074	-7.09344	1.30823e-12	5.21318e-11
CNAG_06832	2880.74	-1.8222	0.295284	-6.17101	6.78547e-10	1.39895e-08
CNAG_01656	1578.8	-1.80895	0.214583	-8.43008	3.45441e-17	3.81736e-15
CNAG_03369	669.292	-1.80217	0.456096	-3.95129	7.77317e-05	0.000384392
CNAG_03671	1799.09	-1.78292	0.267337	-6.66919	2.57223e-11	7.69626e-10
CNAG_01959	7463.94	-1.75834	0.266794	-6.59063	4.37977e-11	1.24741e-09
CNAG_12973	484.535	-1.7539	0.461847	-3.79757	0.000146122	0.000662507
CNAG_01566	3307.53	-1.74345	0.270719	-6.44007	1.1942e-10	3.0548e-09
CNAG_06408	2129.26	-1.74335	0.293659	-5.93666	2.90889e-09	5.07385e-08
CNAG_04619	784.023	-1.74193	0.304926	-5.71261	1.11256e-08	1.66536e-07
CNAG_06761	4678.5	-1.73056	0.198606	-8.71351	2.94605e-18	3.59071e-16
CNAG_04893	123.327	-1.71889	0.411346	-4.17869	2.93199e-05	0.000166099
CNAG_03855	2801.71	-1.71546	0.236542	-7.25225	4.09912e-13	1.87699e-11
CNAG_06141	2686.44	-1.71329	0.193901	-8.8359	9.92997e-19	1.32741e-16
CNAG_00250	4162	-1.69813	0.187226	-9.06992	1.19108e-19	2.01462e-17
CNAG_03044	1090.28	-1.68608	0.269188	-6.26358	3.76234e-10	8.33751e-09
CNAG_01841	1762.71	-1.67924	0.234202	-7.17005	7.49678e-13	3.17007e-11
CNAG_00749	239.746	-1.66598	0.357373	-4.66175	3.13531e-06	2.3818e-05
CNAG_03539	3689.73	-1.65804	0.234989	-7.05581	1.71599e-12	6.5843e-11
CNAG_06052	4476.74	-1.65379	0.133471	-12.3906	2.93946e-35	3.04528e-32
CNAG_12854	75.5943	-1.64415	0.475099	-3.46064	0.000538892	0.0020469
CNAG_02654	8854.33	-1.64198	0.264061	-6.21818	5.02946e-10	1.08836e-08
CNAG_03551	199.038	-1.61845	0.324303	-4.99055	6.02077e-07	5.66404e-06
CNAG_07463	5669.97	-1.61611	0.284619	-5.67816	1.3615e-08	1.99366e-07
CNAG_05655	2215.63	-1.61337	0.213048	-7.5728	3.65269e-14	2.24248e-12
CNAG_12807	384.618	-1.60595	0.172334	-9.31884	1.17618e-20	2.49953e-18
CNAG_07635	6400.21	-1.59072	0.27125	-5.86442	4.50718e-09	7.48607e-08
CNAG_06607	11307.8	-1.5863	0.263098	-6.02931	1.64658e-09	3.07361e-08
CNAG_03389	16276.5	-1.58453	0.205382	-7.71505	1.20937e-14	8.42289e-13
CNAG_05305	435.502	-1.57942	0.306932	-5.14583	2.66343e-07	2.75192e-06
CNAG_00815	50222	-1.571	0.181328	-8.66386	4.56061e-18	5.47802e-16
CNAG_02208	31608.4	-1.55767	0.255309	-6.10113	1.05324e-09	2.05394e-08
CNAG_12597	797.11	-1.54876	0.220823	-7.01356	2.32327e-12	8.48248e-11
CNAG_13126	55.1226	-1.53437	0.413763	-3.70832	0.000208638	0.000903916
CNAG_04742	3392.56	-1.53262	0.27951	-5.48324	4.17609e-08	5.27613e-07
CNAG_02488	2228.7	-1.53062	0.0976152	-15.6801	2.06798e-55	8.56969e-52
CNAG_07784	3719.26	-1.52817	0.207411	-7.36784	1.7342e-13	8.55536e-12
CNAG_04170	4384.48	-1.51393	0.234931	-6.44414	1.1626e-10	2.99243e-09
CNAG_12787	312.167	-1.51104	0.236059	-6.40113	1.54233e-10	3.79313e-09
CNAG_02386	6295.99	-1.50689	0.25041	-6.01768	1.76931e-09	3.27322e-08
CNAG_05987	114.151	-1.50122	0.357363	-4.20082	2.65947e-05	0.000152961
CNAG_02051	4425.93	-1.49834	0.266737	-5.61727	1.93993e-08	2.7484e-07
CNAG_06324	2056.71	-1.49499	0.251457	-5.94529	2.75964e-09	4.8355e-08
CNAG_02193	2396.32	-1.49276	0.275528	-5.41781	6.03346e-08	7.33216e-07
CNAG_06963	24526.6	-1.48999	0.242689	-6.13952	8.27722e-10	1.66106e-08
CNAG_02385	5806.16	-1.48505	0.259167	-5.73011	1.00368e-08	1.53462e-07
CNAG_01916	17996.3	-1.48285	0.246774	-6.00895	1.86729e-09	3.43734e-08
CNAG_03068	721.789	-1.48247	0.157422	-9.4172	4.63289e-21	1.09707e-18
CNAG_12375	189.347	-1.47346	0.380891	-3.86846	0.000109523	0.000514876
CNAG_03552	5694.65	-1.46988	0.279171	-5.26515	1.40074e-07	1.56249e-06
CNAG_02847	1830.24	-1.46104	0.20516	-7.12147	1.06783e-12	4.3597e-11
CNAG_04278	3440.36	-1.45653	0.236563	-6.15705	7.41122e-10	1.50919e-08
CNAG_07736	3632.02	-1.45528	0.383551	-3.79422	0.000148106	0.00066967
CNAG_00172	3599.94	-1.45459	0.272076	-5.34626	8.97892e-08	1.04813e-06
CNAG_12191	28.9783	-1.44681	0.38073	-3.8001	0.00014464	0.000656865
CNAG_05968	662.242	-1.43306	0.275935	-5.19346	2.06424e-07	2.18498e-06
CNAG_04962	9661.74	-1.41578	0.20714	-6.8349	8.20622e-12	2.67723e-10
CNAG_13055	417.316	-1.41375	0.205501	-6.87954	6.00446e-12	2.04794e-10
CNAG_02675	9202.18	-1.41334	0.280447	-5.03961	4.66484e-07	4.52719e-06
CNAG_07627	6599.42	-1.41227	0.275354	-5.12893	2.91396e-07	2.97059e-06
CNAG_04603	3508.98	-1.40175	0.228915	-6.12346	9.15667e-10	1.81556e-08
CNAG_12946	590.331	-1.39855	0.196992	-7.0995	1.2521e-12	5.03759e-11
CNAG_02195	3271.91	-1.39687	0.268594	-5.20068	1.98565e-07	2.11531e-06
CNAG_04857	77668.7	-1.39651	0.144661	-9.65366	4.7432e-22	1.40362e-19
CNAG_01915	30806.1	-1.38426	0.154808	-8.94177	3.82992e-19	5.66828e-17
CNAG_12970	130.626	-1.38075	0.309867	-4.45595	8.35216e-06	5.5556e-05
CNAG_01955	17.2829	-1.37393	0.425386	-3.22985	0.00123854	0.00415253
CNAG_07737	60.7535	-1.36513	0.32964	-4.14127	3.45383e-05	0.00019043
CNAG_04247	2951.9	-1.35563	0.243623	-5.56444	2.63001e-08	3.58512e-07
CNAG_00423	2592.6	-1.34979	0.228599	-5.90461	3.53476e-09	6.02801e-08
CNAG_04091	441.669	-1.34947	0.151017	-8.93586	4.04019e-19	5.77329e-17
CNAG_03148	8296.82	-1.34389	0.250578	-5.36318	8.17689e-08	9.65386e-07
CNAG_01539	43103.5	-1.34373	0.209411	-6.41671	1.39252e-10	3.48678e-09
CNAG_03023	5888.67	-1.3437	0.256521	-5.23819	1.62162e-07	1.77778e-06
CNAG_05668	760.713	-1.33811	0.306687	-4.36312	1.28218e-05	8.075e-05
CNAG_02850	19740.1	-1.33012	0.202597	-6.56534	5.19133e-11	1.44382e-09
CNAG_01907	4657	-1.32963	0.25039	-5.31023	1.09487e-07	1.24306e-06
CNAG_00406	2786.02	-1.32931	0.298189	-4.45795	8.27456e-06	5.5084e-05
CNAG_02721	2762.79	-1.32832	0.33556	-3.95853	7.54112e-05	0.000374032
CNAG_04261	2547	-1.32498	0.246684	-5.37116	7.82322e-08	9.28924e-07
CNAG_06051	8120.19	-1.32002	0.200266	-6.59135	4.35831e-11	1.24557e-09
CNAG_04675	3585.72	-1.31931	0.230187	-5.73146	9.9569e-09	1.52772e-07
CNAG_01468	2080.24	-1.31838	0.313398	-4.20674	2.59081e-05	0.000149635
CNAG_12365	5230.41	-1.30431	0.278839	-4.67764	2.90194e-06	2.23525e-05
CNAG_13153	59.1887	-1.30161	0.369681	-3.5209	0.000430078	0.00168375
CNAG_12806	144.536	-1.29977	0.209877	-6.19303	5.90194e-10	1.24466e-08
CNAG_00099	9832.89	-1.2963	0.234935	-5.51769	3.43494e-08	4.46919e-07
CNAG_06599	4799.14	-1.29592	0.241772	-5.36008	8.31829e-08	9.79289e-07
CNAG_06608	5412.56	-1.29503	0.232441	-5.57144	2.52644e-08	3.4553e-07
CNAG_01490	1245.95	-1.29167	0.144528	-8.93712	3.99442e-19	5.77329e-17
CNAG_05988	60.7031	-1.29092	0.348579	-3.70338	0.000212748	0.000916928
CNAG_05176	8143.75	-1.28794	0.228015	-5.64848	1.61871e-08	2.33726e-07
CNAG_03704	14.565	-1.28203	0.479239	-2.67513	0.00746996	0.0192587
CNAG_05972	1190.95	-1.28044	0.286505	-4.46919	7.8518e-06	5.28212e-05
CNAG_12387	501.974	-1.27983	0.159326	-8.03278	9.52886e-16	7.66749e-14
CNAG_03329	1340.14	-1.27156	0.224954	-5.65254	1.58091e-08	2.28666e-07
CNAG_00539	3222.42	-1.27125	0.215107	-5.90982	3.42483e-09	5.8768e-08
CNAG_06050	2165.59	-1.26661	0.153626	-8.24477	1.65475e-16	1.57638e-14
CNAG_12254	10.5376	-1.26612	0.448457	-2.82328	0.00475354	0.0130714
CNAG_01577	99463.4	-1.26032	0.180183	-6.99469	2.65851e-12	9.53842e-11
CNAG_02958	3727.22	-1.259	0.207896	-6.05592	1.39614e-09	2.65395e-08
CNAG_00780	4603.18	-1.25863	0.23141	-5.43897	5.35909e-08	6.65909e-07
CNAG_13182	23.389	-1.25688	0.42977	-2.92455	0.00344958	0.00990648
CNAG_05863	1809.69	-1.25144	0.256123	-4.88609	1.02857e-06	9.12172e-06
CNAG_04476	1859.22	-1.25096	0.227652	-5.49508	3.90527e-08	4.99489e-07
CNAG_02759	5743.66	-1.24962	0.161603	-7.73263	1.05348e-14	7.39937e-13
CNAG_03524	15981.2	-1.24842	0.257207	-4.85377	1.21134e-06	1.05392e-05
CNAG_07519	35601.5	-1.2472	0.229566	-5.43285	5.54596e-08	6.85021e-07
CNAG_06142	4828.65	-1.24534	0.216036	-5.76449	8.19049e-09	1.28323e-07
CNAG_03374	325.448	-1.2438	0.357681	-3.4774	0.000506304	0.00193733
CNAG_04861	17029.4	-1.24261	0.10291	-12.0747	1.43612e-33	1.3225e-30
CNAG_01500	25.5001	-1.2419	0.413222	-3.00541	0.00265225	0.00795578
CNAG_05986	288.546	-1.23494	0.208119	-5.93383	2.95943e-09	5.14209e-08
CNAG_12033	39.1624	-1.2349	0.372102	-3.31872	0.000904312	0.00319069
CNAG_00349	2936.53	-1.23398	0.164273	-7.51172	5.83544e-14	3.40592e-12
CNAG_04635	33625.3	-1.2334	0.151069	-8.1645	3.22776e-16	2.87652e-14
CNAG_12126	135.325	-1.232	0.223696	-5.50746	3.6404e-08	4.70697e-07
CNAG_12981	229.936	-1.23021	0.269961	-4.557	5.18903e-06	3.70428e-05
CNAG_01441	12478.6	-1.22629	0.173549	-7.06596	1.59505e-12	6.14872e-11
CNAG_00876	20633.5	-1.22585	0.166635	-7.35647	1.88835e-13	9.15241e-12
CNAG_02060	5882.15	-1.22392	0.297782	-4.11013	3.95441e-05	0.000213373
CNAG_04413	159.617	-1.2209	0.236213	-5.16866	2.35775e-07	2.46419e-06
CNAG_06793	5515.18	-1.22016	0.221089	-5.51888	3.41167e-08	4.44889e-07
CNAG_05724	7246.53	-1.21688	0.171621	-7.09052	1.33605e-12	5.29818e-11
CNAG_02217	8390.28	-1.21423	0.194321	-6.24859	4.1417e-10	9.05709e-09
CNAG_05591	4669.98	-1.21085	0.209409	-5.7822	7.37299e-09	1.1684e-07
CNAG_04633	11456.5	-1.20556	0.190172	-6.33935	2.30741e-10	5.41751e-09
CNAG_00687	6247.52	-1.20514	0.251819	-4.78572	1.70371e-06	1.42486e-05
CNAG_03907	5970.55	-1.203	0.261076	-4.60786	4.06842e-06	3.01332e-05
CNAG_01244	770.787	-1.19977	0.181261	-6.61904	3.61534e-11	1.05507e-09
CNAG_03526	537.474	-1.19745	0.237499	-5.0419	4.6093e-07	4.47853e-06
CNAG_00085	1548.7	-1.19436	0.21417	-5.5767	2.45123e-08	3.36912e-07
CNAG_02578	4071.38	-1.19261	0.213366	-5.5895	2.27726e-08	3.16676e-07
CNAG_00887	84.6887	-1.18654	0.272285	-4.35771	1.31431e-05	8.23355e-05
CNAG_05869	66.2762	-1.18637	0.382387	-3.10254	0.00191865	0.00605321
CNAG_06182	12757.6	-1.18252	0.234204	-5.04911	4.43877e-07	4.32298e-06
CNAG_02141	1636.23	-1.18063	0.292024	-4.04291	5.2791e-05	0.000274659
CNAG_02777	112983	-1.17776	0.241079	-4.88537	1.03236e-06	9.12172e-06
CNAG_05963	5030.94	-1.17582	0.199235	-5.90168	3.59825e-09	6.11112e-08
CNAG_07415	10423.4	-1.17472	0.276542	-4.24787	2.1581e-05	0.000127577
CNAG_03341	11013.9	-1.17247	0.244427	-4.79679	1.61229e-06	1.36423e-05
CNAG_06634	3648.08	-1.16856	0.205491	-5.68666	1.29547e-08	1.90311e-07
CNAG_01438	10019.4	-1.16807	0.217111	-5.38007	7.44589e-08	8.8666e-07
CNAG_02566	14771.2	-1.16144	0.245564	-4.7297	2.24857e-06	1.81639e-05
CNAG_06434	8334.16	-1.16093	0.217508	-5.33739	9.42954e-08	1.09304e-06
CNAG_00681	7154.01	-1.16088	0.259386	-4.47547	7.62428e-06	5.1639e-05
CNAG_00145	3228.97	-1.15754	0.192287	-6.01985	1.74577e-09	3.2369e-08
CNAG_00110	2213.53	-1.15572	0.2427	-4.76193	1.91747e-06	1.5892e-05
CNAG_01389	1905.31	-1.15184	0.242213	-4.75548	1.97974e-06	1.63102e-05
CNAG_02491	2899.24	-1.1518	0.249412	-4.61806	3.87348e-06	2.88699e-05
CNAG_01981	14768.7	-1.15111	0.123226	-9.34152	9.49622e-21	2.12715e-18
CNAG_06802	12.4174	-1.15057	0.485395	-2.37038	0.0177696	0.0401293
CNAG_03005	770.517	-1.15056	0.274592	-4.19007	2.78868e-05	0.000159287
CNAG_03993	4177.2	-1.15	0.203137	-5.66121	1.50309e-08	2.18172e-07
CNAG_03125	1060.71	-1.14894	0.215555	-5.33014	9.81371e-08	1.13439e-06
CNAG_02184	89.1256	-1.14542	0.291404	-3.93069	8.47016e-05	0.000412703
CNAG_04079	7145.21	-1.14287	0.175449	-6.514	7.3177e-11	1.9814e-09
CNAG_03313	371.709	-1.14223	0.241881	-4.72226	2.33237e-06	1.87313e-05
CNAG_07687	786.736	-1.14165	0.128194	-8.90566	5.30701e-19	7.455e-17
CNAG_06352	6900.24	-1.13583	0.269546	-4.21386	2.51042e-05	0.000145805
CNAG_00826	1318.5	-1.13573	0.256516	-4.42754	9.53142e-06	6.22485e-05
CNAG_01573	10232	-1.13544	0.196824	-5.76883	7.98235e-09	1.25536e-07
CNAG_07842	164.988	-1.13529	0.198468	-5.72029	1.06345e-08	1.60252e-07
CNAG_12546	56.057	-1.13528	0.386475	-2.93752	0.00330846	0.00955418
CNAG_00373	7561.86	-1.13461	0.136227	-8.32882	8.16494e-17	8.35444e-15
CNAG_05825	12676.7	-1.13243	0.206235	-5.49096	3.99758e-08	5.08939e-07
CNAG_06588	6639.09	-1.1293	0.186083	-6.0688	1.28869e-09	2.46667e-08
CNAG_03406	3198.07	-1.12928	0.203501	-5.54926	2.86882e-08	3.84115e-07
CNAG_05515	13038.6	-1.12778	0.149035	-7.56723	3.81258e-14	2.30647e-12
CNAG_13013	99.3017	-1.12119	0.297539	-3.76822	0.000164413	0.00073498
CNAG_07491	8750.81	-1.11601	0.269747	-4.13726	3.51476e-05	0.0001933
CNAG_06567	17395.7	-1.11096	0.203139	-5.46898	4.52633e-08	5.6668e-07
CNAG_05429	1081.44	-1.11083	0.24877	-4.46528	7.99634e-06	5.35329e-05
CNAG_03308	15568.4	-1.10888	0.20312	-5.45924	4.78188e-08	5.97771e-07
CNAG_12624	9.1653	-1.10838	0.455953	-2.43091	0.0150608	0.0349451
CNAG_01909	3225.98	-1.10795	0.251548	-4.40453	1.06011e-05	6.82689e-05
CNAG_07681	2898.94	-1.10337	0.223141	-4.94474	7.62453e-07	6.99801e-06
CNAG_07686	6306.39	-1.09926	0.212502	-5.17293	2.30451e-07	2.42076e-06
CNAG_03037	680.577	-1.0982	0.244735	-4.48731	7.21293e-06	4.92428e-05
CNAG_00920	2446.66	-1.09814	0.294518	-3.72859	0.000192554	0.000842648
CNAG_05551	4165.84	-1.09735	0.206353	-5.31783	1.05011e-07	1.19715e-06
CNAG_08029	2708.9	-1.09443	0.218852	-5.00078	5.70988e-07	5.39606e-06
CNAG_12097	79.638	-1.09356	0.308241	-3.54773	0.000388566	0.0015372
CNAG_06698	6520.53	-1.09196	0.117788	-9.27054	1.852e-20	3.75338e-18
CNAG_04682	1819.19	-1.08707	0.22239	-4.88813	1.01797e-06	9.04276e-06
CNAG_04026	4869.32	-1.08617	0.244258	-4.44682	8.71518e-06	5.74633e-05
CNAG_04692	5403.82	-1.08401	0.199912	-5.42244	5.87908e-08	7.15504e-07
CNAG_12075	131.842	-1.08374	0.231686	-4.67764	2.90193e-06	2.23525e-05
CNAG_03498	7231.41	-1.08328	0.119919	-9.03344	1.66354e-19	2.55322e-17
CNAG_04412	2293.68	-1.08083	0.118234	-9.14144	6.1627e-20	1.11036e-17
CNAG_07638	9504.89	-1.07404	0.195509	-5.49358	3.93868e-08	5.02211e-07
CNAG_12323	433.248	-1.07347	0.191008	-5.62002	1.90932e-08	2.71898e-07
CNAG_01333	2588.64	-1.07283	0.242498	-4.42409	9.68511e-06	6.31055e-05
CNAG_01726	19309.5	-1.07249	0.211328	-5.07501	3.87476e-07	3.82765e-06
CNAG_06487	2880.64	-1.07126	0.243156	-4.40563	1.05476e-05	6.79769e-05
CNAG_12558	192.609	-1.06681	0.326286	-3.26955	0.00107717	0.00368758
CNAG_07910	48.9669	-1.06648	0.385041	-2.76978	0.00560937	0.0150454
CNAG_00701	8913.43	-1.06604	0.16956	-6.28712	3.23405e-10	7.2639e-09
CNAG_04148	4014.63	-1.06238	0.206076	-5.15529	2.53233e-07	2.63999e-06
CNAG_07041	271.038	-1.05952	0.161016	-6.58021	4.69793e-11	1.31542e-09
CNAG_05479	8596.85	-1.0579	0.190203	-5.56198	2.66724e-08	3.62063e-07
CNAG_06817	4342.22	-1.0573	0.254898	-4.14795	3.35462e-05	0.0001871
CNAG_04632	2168.23	-1.05629	0.309753	-3.4101	0.000649391	0.00240275
CNAG_05245	2435.96	-1.05543	0.23266	-4.53636	5.72334e-06	4.04736e-05
CNAG_04052	7081.05	-1.05232	0.236378	-4.45185	8.51323e-06	5.64461e-05
CNAG_02073	5030.43	-1.05137	0.130194	-8.07538	6.72678e-16	5.63147e-14
CNAG_05279	220.973	-1.05107	0.246283	-4.26774	1.97463e-05	0.00011825
CNAG_02574	5046.87	-1.04709	0.18635	-5.61895	1.92118e-08	2.73118e-07
CNAG_01263	21894.7	-1.04474	0.164219	-6.3619	1.99273e-10	4.78632e-09
CNAG_00399	5113.01	-1.04413	0.151138	-6.90844	4.90006e-12	1.69924e-10
CNAG_07388	20.3278	-1.04223	0.439192	-2.37307	0.0176409	0.0398712
CNAG_02194	4947.78	-1.04062	0.233306	-4.46033	8.18319e-06	5.46392e-05
CNAG_06104	4625.5	-1.04016	0.288491	-3.60551	0.000311536	0.00127507
CNAG_05374	8153.69	-1.03928	0.196918	-5.27773	1.30797e-07	1.46098e-06
CNAG_03487	5531.8	-1.03927	0.236013	-4.40343	1.06553e-05	6.85644e-05
CNAG_13198	1083.63	-1.03895	0.239827	-4.33207	1.47715e-05	9.16364e-05
CNAG_00472	2067.69	-1.03728	0.205385	-5.05041	4.40851e-07	4.29856e-06
CNAG_03716	5094.13	-1.03668	0.255593	-4.05599	4.99224e-05	0.000261515
CNAG_06687	7545.36	-1.03571	0.242606	-4.26912	1.96243e-05	0.000117689
CNAG_03259	341.178	-1.03424	0.173015	-5.97775	2.26237e-09	4.05855e-08
CNAG_05586	4263.07	-1.03313	0.139196	-7.42212	1.15264e-13	5.97069e-12
CNAG_02138	7035.97	-1.02772	0.234481	-4.38296	1.17079e-05	7.45847e-05
CNAG_07971	964.122	-1.02762	0.232727	-4.41554	1.00756e-05	6.52397e-05
CNAG_02270	5346.1	-1.02536	0.127615	-8.03477	9.37545e-16	7.63261e-14
CNAG_12654	78.6977	-1.02444	0.26257	-3.90158	9.55677e-05	0.000458539
CNAG_12757	47.8001	-1.02421	0.300326	-3.41034	0.000648825	0.00240173
CNAG_12347	20.5565	-1.01842	0.424379	-2.39979	0.0164044	0.0375475
CNAG_00299	6925.39	-1.01653	0.210458	-4.83006	1.3649e-06	1.17105e-05
CNAG_12935	1152.65	-1.01551	0.193289	-5.25386	1.48942e-07	1.65031e-06
CNAG_06795	10501.3	-1.01396	0.0716611	-14.1494	1.8831e-45	2.60119e-42
CNAG_02432	4268.22	-1.01355	0.237147	-4.27393	1.92053e-05	0.000115511
CNAG_06227	7407.4	-1.01151	0.14145	-7.15101	8.61425e-13	3.6058e-11
CNAG_02186	860.548	-1.01016	0.287284	-3.51622	0.000437734	0.00171048
CNAG_07387	2434.61	-1.00905	0.237414	-4.25015	2.13631e-05	0.000126499
CNAG_12922	104.997	-1.00846	0.419319	-2.405	0.0161725	0.0371295
CNAG_06611	26271.7	-1.00768	0.202099	-4.98606	6.16236e-07	5.7841e-06
CNAG_02705	1104.75	-1.00601	0.237354	-4.23845	2.25067e-05	0.000132295
CNAG_12469	13.1673	-1.00405	0.433588	-2.31568	0.0205756	0.0453297
CNAG_12337	84.2159	-1.00235	0.295319	-3.39414	0.000688451	0.00252473
CNAG_04653	935.126	-1.00137	0.23267	-4.3038	1.67895e-05	0.000102847
CNAG_00418	41816	-1.00129	0.191843	-5.21932	1.79579e-07	1.93293e-06
CNAG_01975	7579.72	-1.00055	0.206055	-4.85571	1.19953e-06	1.0454e-05
CNAG_02829	6696.41	-1.00049	0.210297	-4.75749	1.9601e-06	1.61806e-05
CNAG_00333	3888.28	-0.99939	0.120169	-8.31653	9.05785e-17	9.15506e-15
CNAG_05924	1102.43	-0.998452	0.200635	-4.97646	6.4757e-07	6.04399e-06
CNAG_13195	17.0861	-0.996287	0.467815	-2.12966	0.0331995	0.0681015
CNAG_03357	4830.81	-0.996176	0.193046	-5.1603	2.46555e-07	2.57361e-06
CNAG_01163	11857.3	-0.992296	0.209417	-4.73837	2.15441e-06	1.754e-05
CNAG_03184	6369.41	-0.99104	0.245968	-4.02915	5.59799e-05	0.000289795
CNAG_01939	12232	-0.98846	0.200512	-4.92968	8.23631e-07	7.50963e-06
CNAG_02005	121.343	-0.987604	0.364192	-2.71177	0.00669258	0.0175034
CNAG_03099	4000.93	-0.986294	0.266216	-3.70486	0.000211508	0.000912533
CNAG_07856	10066.3	-0.986207	0.188486	-5.23226	1.67451e-07	1.82609e-06
CNAG_03291	2559.74	-0.98512	0.17819	-5.52847	3.23036e-08	4.24298e-07
CNAG_05153	6268.58	-0.984952	0.186206	-5.28959	1.22588e-07	1.37484e-06
CNAG_12465	18.9691	-0.984706	0.454113	-2.16842	0.030127	0.0625639
CNAG_07548	3378.99	-0.983884	0.193388	-5.0876	3.62616e-07	3.60355e-06
CNAG_01814	4916.24	-0.981945	0.165015	-5.95063	2.67106e-09	4.69021e-08
CNAG_03923	2188.12	-0.980623	0.247543	-3.96143	7.45025e-05	0.000370634
CNAG_12799	9.65218	-0.978872	0.468252	-2.09048	0.0365745	0.0736288
CNAG_12008	24.8526	-0.978247	0.442561	-2.21043	0.0270756	0.0571872
CNAG_02541	12156.3	-0.976752	0.191957	-5.08839	3.61109e-07	3.5972e-06
CNAG_07483	5367.92	-0.97566	0.217944	-4.47666	7.58185e-06	5.14647e-05
CNAG_13117	339.489	-0.974697	0.30762	-3.16851	0.00153221	0.00498391
CNAG_00758	3825.03	-0.974612	0.186535	-5.22483	1.74315e-07	1.88853e-06
CNAG_07321	3387.2	-0.973901	0.222743	-4.37231	1.22937e-05	7.78976e-05
CNAG_00106	15174.5	-0.973896	0.22504	-4.32766	1.50704e-05	9.31419e-05
CNAG_02319	5128.57	-0.973379	0.266712	-3.64955	0.000262702	0.00110074
CNAG_07751	6284.08	-0.972302	0.121315	-8.01471	1.10397e-15	8.63181e-14
CNAG_13187	9.58982	-0.971941	0.445134	-2.18348	0.0290006	0.060635
CNAG_06916	11929.6	-0.971773	0.208401	-4.66299	3.11654e-06	2.37177e-05
CNAG_04662	8046.38	-0.971355	0.21901	-4.43521	9.19841e-06	6.02659e-05
CNAG_05268	93.7729	-0.971196	0.27622	-3.51603	0.00043805	0.00171091
CNAG_01536	9535.7	-0.971171	0.2263	-4.29153	1.7745e-05	0.000107744
CNAG_03856	90599.3	-0.966206	0.101459	-9.52309	1.68105e-21	4.22198e-19
CNAG_00919	21209	-0.964564	0.152701	-6.31668	2.67238e-10	6.13536e-09
CNAG_00377	21476.4	-0.964345	0.236384	-4.07956	4.5121e-05	0.000240027
CNAG_06725	3530.12	-0.963276	0.209603	-4.59571	4.31271e-06	3.14646e-05
CNAG_05432	380.608	-0.961696	0.264214	-3.63984	0.000272808	0.00113488
CNAG_06079	14486	-0.961511	0.186804	-5.14715	2.64474e-07	2.73653e-06
CNAG_00934	3486.82	-0.961168	0.169464	-5.67182	1.41286e-08	2.06521e-07
CNAG_04407	3081.34	-0.960298	0.208426	-4.60737	4.07792e-06	3.01766e-05
CNAG_02371	1014.72	-0.959601	0.204333	-4.69626	2.64966e-06	2.08353e-05
CNAG_02437	21287.5	-0.955476	0.200386	-4.76817	1.85911e-06	1.54546e-05
CNAG_13119	26.4495	-0.95211	0.356287	-2.67231	0.00753308	0.0194015
CNAG_04394	214.351	-0.94802	0.216158	-4.38577	1.15578e-05	7.37421e-05
CNAG_06541	27216.6	-0.9471	0.244008	-3.88144	0.000103842	0.000491513
CNAG_04528	3265.14	-0.943709	0.240195	-3.92894	8.53221e-05	0.000415237
CNAG_00384	2685.17	-0.942891	0.149332	-6.31406	2.71812e-10	6.20599e-09
CNAG_12388	139.41	-0.942862	0.291178	-3.23809	0.00120333	0.00405447
CNAG_02389	3410.7	-0.942777	0.232448	-4.05587	4.9949e-05	0.000261515
CNAG_00063	1866.33	-0.940572	0.186793	-5.03538	4.76902e-07	4.6121e-06
CNAG_01144	12453.5	-0.937067	0.190302	-4.92409	8.47525e-07	7.69363e-06
CNAG_07311	2487.62	-0.93579	0.237381	-3.94214	8.07586e-05	0.000397699
CNAG_06949	4349.65	-0.934716	0.147104	-6.35414	2.09601e-10	5.00626e-09
CNAG_02540	1917.48	-0.931652	0.121364	-7.67649	1.63502e-14	1.08408e-12
CNAG_02749	7825.8	-0.931057	0.24236	-3.84163	0.00012222	0.000565268
CNAG_06507	2258.23	-0.930841	0.187062	-4.9761	6.4877e-07	6.04838e-06
CNAG_07373	71250.4	-0.925932	0.204528	-4.52717	5.97795e-06	4.19831e-05
CNAG_03731	2465.94	-0.924482	0.220805	-4.18687	2.82828e-05	0.000161105
CNAG_03500	3961.03	-0.923891	0.264097	-3.4983	0.000468235	0.00181089
CNAG_02849	169.164	-0.921446	0.276655	-3.33067	0.000866385	0.00307652
CNAG_01810	2602.51	-0.919423	0.18201	-5.0515	4.38365e-07	4.27935e-06
CNAG_08005	827.097	-0.917636	0.156764	-5.85363	4.80961e-09	7.94417e-08
CNAG_06020	4648.12	-0.915935	0.205361	-4.46012	8.19151e-06	5.46392e-05
CNAG_03239	1213.33	-0.915142	0.243617	-3.75648	0.00017232	0.000765373
CNAG_07951	4003.92	-0.912796	0.19904	-4.586	4.51817e-06	3.27044e-05
CNAG_06707	1174.43	-0.912352	0.198283	-4.60126	4.19946e-06	3.08322e-05
CNAG_05541	2791.8	-0.911346	0.19467	-4.6815	2.84781e-06	2.20585e-05
CNAG_12320	700.778	-0.90621	0.193607	-4.68067	2.85942e-06	2.21218e-05
CNAG_06708	3950.54	-0.901865	0.220319	-4.09345	4.2501e-05	0.000227698
CNAG_03453	5383.7	-0.901201	0.259491	-3.47296	0.000514761	0.00196424
CNAG_03962	8028.72	-0.900193	0.235006	-3.83051	0.000127877	0.000589459
CNAG_04802	5506.3	-0.899987	0.18287	-4.92144	8.59086e-07	7.78154e-06
CNAG_07873	12345.4	-0.899065	0.21739	-4.13572	3.53847e-05	0.000194218
CNAG_03332	4075.73	-0.898462	0.146997	-6.11213	9.83111e-10	1.92625e-08
CNAG_04355	1635.29	-0.897187	0.270543	-3.31624	0.000912367	0.00320873
CNAG_02707	262.906	-0.897179	0.155105	-5.78435	7.27945e-09	1.16147e-07
CNAG_12598	760.762	-0.893813	0.144666	-6.17846	6.47314e-10	1.3446e-08
CNAG_00904	854.397	-0.892299	0.283946	-3.14249	0.00167516	0.00537711
CNAG_02196	7983.76	-0.891197	0.140611	-6.33803	2.32729e-10	5.44875e-09
CNAG_03166	847.18	-0.890722	0.118654	-7.50687	6.05581e-14	3.44869e-12
CNAG_02086	7074.95	-0.889744	0.183315	-4.85363	1.21221e-06	1.05392e-05
CNAG_13086	23.6998	-0.889088	0.29779	-2.98562	0.00283002	0.00840187
CNAG_07552	5752.88	-0.888747	0.222031	-4.0028	6.25964e-05	0.000319674
CNAG_02589	3600.75	-0.888055	0.179692	-4.9421	7.72857e-07	7.08566e-06
CNAG_07435	1716.78	-0.887633	0.137558	-6.45279	1.09813e-10	2.84416e-09
CNAG_01354	5281.04	-0.886639	0.132198	-6.70688	1.98825e-11	6.03612e-10
CNAG_01730	2746.45	-0.886589	0.222129	-3.99132	6.57073e-05	0.00033369
CNAG_12238	800.231	-0.885824	0.171042	-5.17898	2.231e-07	2.34949e-06
CNAG_12110	653.424	-0.885294	0.140068	-6.32046	2.60794e-10	6.02078e-09
CNAG_03484	4030.91	-0.88505	0.22155	-3.99482	6.47438e-05	0.000329403
CNAG_07464	17613.7	-0.884357	0.219939	-4.02092	5.79715e-05	0.000298242
CNAG_03090	1641.05	-0.881331	0.202103	-4.3608	1.29588e-05	8.14893e-05
CNAG_01272	98183.4	-0.881012	0.228692	-3.8524	0.000116966	0.000544919
CNAG_03715	4153.19	-0.878625	0.260922	-3.36738	0.00075886	0.00274049
CNAG_02729	2130.14	-0.878364	0.194035	-4.52683	5.98746e-06	4.19831e-05
CNAG_03237	4871.18	-0.878194	0.168227	-5.22028	1.78649e-07	1.92792e-06
CNAG_02902	1829.1	-0.87638	0.24913	-3.51776	0.000435204	0.0017014
CNAG_06993	6294.4	-0.875728	0.142142	-6.16093	7.23196e-10	1.48255e-08
CNAG_01246	3645.01	-0.875677	0.165214	-5.30026	1.15638e-07	1.30751e-06
CNAG_04348	11286.4	-0.875646	0.195868	-4.4706	7.80013e-06	5.25162e-05
CNAG_12927	27.4032	-0.875396	0.384628	-2.27595	0.0228488	0.049453
CNAG_01851	14.723	-0.873055	0.382643	-2.28164	0.0225105	0.0488267
CNAG_12655	314.543	-0.872396	0.172635	-5.05341	4.3399e-07	4.24665e-06
CNAG_07756	3401.89	-0.87211	0.211739	-4.1188	3.80846e-05	0.000206709
CNAG_06914	5050.16	-0.871662	0.247162	-3.52668	0.000420797	0.00164975
CNAG_05452	8366.37	-0.870334	0.21727	-4.00576	6.18175e-05	0.000316067
CNAG_03474	1865.76	-0.870102	0.180331	-4.82503	1.39981e-06	1.19851e-05
CNAG_01051	8572.85	-0.869644	0.182302	-4.77035	1.83906e-06	1.53034e-05
CNAG_04153	1426.65	-0.868893	0.163096	-5.32749	9.95787e-08	1.14945e-06
CNAG_00585	2942.5	-0.868424	0.194021	-4.47592	7.60813e-06	5.16008e-05
CNAG_03911	3164.91	-0.868386	0.103971	-8.35215	6.70293e-17	7.12229e-15
CNAG_05009	1925.53	-0.86789	0.17712	-4.90001	9.58316e-07	8.55875e-06
CNAG_02345	2568.29	-0.867593	0.224435	-3.86568	0.000110778	0.000520482
CNAG_07964	14647.3	-0.866699	0.24183	-3.58391	0.000338484	0.00136647
CNAG_06697	6356.11	-0.866473	0.236572	-3.66261	0.000249657	0.00105087
CNAG_07954	66.8052	-0.866306	0.372177	-2.32768	0.0199294	0.0441997
CNAG_00765	4875.49	-0.865609	0.128109	-6.7568	1.41068e-11	4.41197e-10
CNAG_04648	7051.19	-0.865126	0.191734	-4.51212	6.41819e-06	4.46258e-05
CNAG_01639	13104.7	-0.864375	0.195727	-4.41624	1.00433e-05	6.51047e-05
CNAG_01725	318.533	-0.863973	0.223629	-3.86341	0.000111814	0.000524454
CNAG_07733	73.2706	-0.863238	0.270981	-3.18561	0.00144451	0.00473392
CNAG_12651	10.0254	-0.860767	0.468238	-1.83831	0.0660169	0.120517
CNAG_04087	1765.84	-0.860719	0.226122	-3.80644	0.000140984	0.000642018
CNAG_01421	20376	-0.857821	0.170435	-5.03314	4.82508e-07	4.65545e-06
CNAG_02517	810.849	-0.85772	0.238914	-3.59007	0.000330583	0.00133717
CNAG_06647	9485.34	-0.857312	0.195121	-4.39375	1.11412e-05	7.1469e-05
CNAG_02146	8.91503	-0.857029	0.429941	-1.99337	0.0462214	0.0894076
CNAG_03398	178.83	-0.856867	0.329511	-2.60042	0.00931085	0.0231389
CNAG_12788	430.226	-0.856726	0.157881	-5.4264	5.75031e-08	7.06019e-07
CNAG_12331	351.329	-0.856221	0.355046	-2.41158	0.0158835	0.036608
CNAG_01134	3791.51	-0.855464	0.203264	-4.20864	2.5691e-05	0.000148692
CNAG_02531	1533.01	-0.854763	0.130577	-6.54606	5.90741e-11	1.63202e-09
CNAG_05144	12802	-0.854258	0.200487	-4.26091	2.03593e-05	0.000121193
CNAG_00714	1382.9	-0.854226	0.167378	-5.10357	3.33304e-07	3.35246e-06
CNAG_02992	4265.27	-0.854153	0.185351	-4.6083	4.05983e-06	3.00965e-05
CNAG_01562	425204	-0.854002	0.138168	-6.18091	6.3732e-10	1.33387e-08
CNAG_05884	45876.5	-0.853141	0.204646	-4.16886	3.06122e-05	0.000172712
CNAG_04500	2678.73	-0.852685	0.164883	-5.17145	2.32284e-07	2.43077e-06
CNAG_00501	687.459	-0.852468	0.152903	-5.57524	2.47187e-08	3.38959e-07
CNAG_01668	172.628	-0.852125	0.164736	-5.17269	2.30751e-07	2.42084e-06
CNAG_02771	5202.48	-0.849412	0.192629	-4.40957	1.03578e-05	6.70145e-05
CNAG_03171	9327.19	-0.846818	0.204356	-4.14383	3.41547e-05	0.000188842
CNAG_00720	7692.16	-0.844007	0.204782	-4.12149	3.76429e-05	0.000204772
CNAG_01101	7522.49	-0.842085	0.223521	-3.76736	0.000164983	0.000736339
CNAG_03836	5992.12	-0.836501	0.173934	-4.8093	1.51461e-06	1.28882e-05
CNAG_12473	64.7129	-0.835635	0.340751	-2.45234	0.0141932	0.0332101
CNAG_13127	159.756	-0.833981	0.213959	-3.89785	9.70512e-05	0.000464268
CNAG_12678	1553.59	-0.833733	0.239822	-3.47646	0.000508074	0.0019432
CNAG_03318	517.592	-0.833545	0.16088	-5.18115	2.20517e-07	2.32525e-06
CNAG_07331	389.575	-0.831217	0.198238	-4.19304	2.75244e-05	0.000157753
CNAG_00812	6649.3	-0.831179	0.200461	-4.14633	3.37845e-05	0.000187798
CNAG_12936	408.404	-0.830326	0.18441	-4.50262	6.71213e-06	4.63584e-05
CNAG_01653	26315.3	-0.827069	0.297708	-2.77812	0.00546742	0.0147219
CNAG_03767	6694.72	-0.826355	0.197099	-4.19258	2.75801e-05	0.000157753
CNAG_02052	251.856	-0.825348	0.206466	-3.99751	6.40126e-05	0.000326083
CNAG_05061	571.53	-0.823473	0.163596	-5.03357	4.81428e-07	4.65044e-06
CNAG_05425	20220.4	-0.8229	0.138035	-5.96152	2.49897e-09	4.45407e-08
CNAG_00149	9669.07	-0.821781	0.147996	-5.55271	2.81274e-08	3.77828e-07
CNAG_00076	5033.24	-0.82163	0.143783	-5.71436	1.10115e-08	1.65332e-07
CNAG_07428	7535.77	-0.821376	0.137943	-5.95448	2.60904e-09	4.61678e-08
CNAG_05185	383.067	-0.8191	0.220936	-3.7074	0.000209395	0.000905775
CNAG_04758	5559.02	-0.818689	0.384677	-2.12825	0.0333165	0.0682301
CNAG_12622	357.44	-0.818508	0.191364	-4.27723	1.89231e-05	0.000114062
CNAG_04708	3265.53	-0.818117	0.265683	-3.0793	0.00207491	0.00646209
CNAG_07965	50923.4	-0.817087	0.163112	-5.00936	5.46116e-07	5.20852e-06
CNAG_01122	381.392	-0.816976	0.172505	-4.73596	2.18019e-06	1.76977e-05
CNAG_07945	189.539	-0.816546	0.247388	-3.30067	0.000964535	0.00336309
CNAG_12240	48.1694	-0.816463	0.260833	-3.13021	0.00174681	0.00557471
CNAG_05725	44243.7	-0.816101	0.0797586	-10.2321	1.42343e-24	6.20917e-22
CNAG_05508	2276.5	-0.814699	0.250882	-3.24734	0.00116489	0.00394228
CNAG_12035	41.1775	-0.814011	0.406852	-2.00075	0.0454189	0.0880955
CNAG_06833	167.96	-0.81358	0.221884	-3.6667	0.000245705	0.00103687
CNAG_06333	3906.5	-0.81242	0.165644	-4.90462	9.36102e-07	8.37841e-06
CNAG_13056	50.2004	-0.811737	0.283753	-2.86072	0.00422684	0.0118192
CNAG_01264	9006.77	-0.811727	0.101028	-8.0347	9.38074e-16	7.63261e-14
CNAG_07752	9175.87	-0.811134	0.132707	-6.1122	9.82698e-10	1.92625e-08
CNAG_05177	6647.18	-0.810151	0.235887	-3.43449	0.000593675	0.00222742
CNAG_03057	2375.74	-0.809018	0.277745	-2.9128	0.00358199	0.0102265
CNAG_05576	1779.21	-0.806248	0.213526	-3.77587	0.000159448	0.000715875
CNAG_03983	12085.3	-0.806043	0.136263	-5.91534	3.31186e-09	5.70659e-08
CNAG_01325	1621.62	-0.804678	0.224702	-3.58109	0.000342168	0.00137865
CNAG_01531	2909.63	-0.804119	0.236061	-3.40641	0.00065823	0.00243111
CNAG_01390	5640.21	-0.803984	0.15874	-5.06478	4.08872e-07	4.02462e-06
CNAG_03460	40.4621	-0.803859	0.268885	-2.9896	0.00279345	0.0083251
CNAG_07946	336.515	-0.802324	0.308274	-2.60263	0.00925107	0.0230111
CNAG_12252	75.5908	-0.802181	0.403471	-1.9882	0.0467895	0.0903942
CNAG_02484	149.117	-0.801728	0.23014	-3.48365	0.000494635	0.00189969
CNAG_06194	360.907	-0.801112	0.311612	-2.57086	0.0101445	0.0249046
CNAG_05828	13236.4	-0.798974	0.163338	-4.89153	1.00057e-06	8.89779e-06
CNAG_13192	895.432	-0.796618	0.224007	-3.55621	0.000376237	0.00149988
CNAG_05459	35031.7	-0.795803	0.197293	-4.03362	5.49241e-05	0.000284863
CNAG_01663	2722.66	-0.794751	0.181534	-4.37797	1.19788e-05	7.60767e-05
CNAG_05678	12998.1	-0.793281	0.184639	-4.29638	1.73609e-05	0.000105799
CNAG_01683	34342.7	-0.792226	0.17217	-4.60142	4.19613e-06	3.08322e-05
CNAG_07502	22902.2	-0.791474	0.141684	-5.58621	2.32077e-08	3.22187e-07
CNAG_04901	681.679	-0.79078	0.198282	-3.98815	6.65907e-05	0.00033735
CNAG_12906	1752.27	-0.790635	0.132413	-5.97096	2.3586e-09	4.21448e-08
CNAG_05372	16298.7	-0.789729	0.122802	-6.43091	1.2684e-10	3.20503e-09
CNAG_13177	1.62174	-0.787947	0.475308	-1.65776	0.0973657	0.166557
CNAG_02414	68.7262	-0.786964	0.305784	-2.5736	0.0100648	0.0247454
CNAG_03655	10531.6	-0.786189	0.27215	-2.88881	0.00386701	0.0109273
CNAG_12596	8.99423	-0.786062	0.485611	-1.61871	0.10551	0.177991
CNAG_01316	4751.03	-0.784991	0.163653	-4.79669	1.61311e-06	1.36423e-05
CNAG_03906	2071.59	-0.784101	0.125284	-6.25861	3.88433e-10	8.56205e-09
CNAG_04015	565.399	-0.783889	0.171776	-4.56342	5.03263e-06	3.61129e-05
CNAG_05131	663.639	-0.783825	0.172971	-4.53153	5.85575e-06	4.13746e-05
CNAG_01189	26847.5	-0.779537	0.21252	-3.66806	0.000244398	0.00103187
CNAG_03532	33.7777	-0.778462	0.287851	-2.70439	0.00684301	0.0178239
CNAG_00107	1527.48	-0.777416	0.352183	-2.20742	0.0272848	0.057585
CNAG_00425	22.6958	-0.777083	0.393085	-1.97688	0.0480551	0.0924515
CNAG_02364	1623.54	-0.776071	0.103512	-7.49737	6.51086e-14	3.61394e-12
CNAG_12280	272.417	-0.775695	0.240561	-3.22452	0.00126184	0.00421529
CNAG_06751	12873.7	-0.775163	0.195626	-3.96247	7.4177e-05	0.00036968
CNAG_00179	866.647	-0.774811	0.243538	-3.18148	0.00146523	0.00478857
CNAG_01119	15704.6	-0.774763	0.25457	-3.04342	0.00233908	0.00714569
CNAG_07824	2608.48	-0.774396	0.165724	-4.67281	2.9711e-06	2.28005e-05
CNAG_02353	2297.6	-0.774163	0.177901	-4.35164	1.35122e-05	8.42916e-05
CNAG_04128	3147.61	-0.773228	0.140592	-5.49979	3.80249e-08	4.89364e-07
CNAG_03654	7080.05	-0.772973	0.168641	-4.58354	4.57161e-06	3.30624e-05
CNAG_01149	9659.37	-0.772864	0.228083	-3.38852	0.000702699	0.00256337
CNAG_13016	54.1731	-0.772234	0.35677	-2.16452	0.0304247	0.0630715
CNAG_12958	457.417	-0.771739	0.193415	-3.99007	6.60529e-05	0.000335035
CNAG_06344	4275.03	-0.771309	0.129845	-5.94022	2.84638e-09	4.97696e-08
CNAG_06845	5239.16	-0.770607	0.248515	-3.10085	0.00192969	0.00607437
CNAG_01334	9222.79	-0.770016	0.225316	-3.4175	0.000631996	0.00235309
CNAG_12923	61.8808	-0.769374	0.393123	-1.95708	0.0503376	0.0960179
CNAG_02393	10749.9	-0.767865	0.220286	-3.48576	0.000490741	0.00188824
CNAG_03975	15577.3	-0.766511	0.182055	-4.21032	2.55005e-05	0.000147693
CNAG_00292	20608	-0.766353	0.17131	-4.47348	7.69573e-06	5.20166e-05
CNAG_04027	13170.7	-0.76627	0.205587	-3.72723	0.000193592	0.000846699
CNAG_03212	2910.33	-0.765927	0.233317	-3.28278	0.00102789	0.00355707
CNAG_07567	6995.22	-0.765587	0.164914	-4.64234	3.44483e-06	2.59552e-05
CNAG_04504	9202.72	-0.765078	0.155574	-4.91776	8.75387e-07	7.91189e-06
CNAG_12743	27.3562	-0.764498	0.386694	-1.97701	0.0480404	0.0924447
CNAG_12386	32.1471	-0.764354	0.478376	-1.59781	0.110085	0.184134
CNAG_05514	527.152	-0.764248	0.171131	-4.46587	7.97425e-06	5.34281e-05
CNAG_04114	50182.1	-0.764002	0.0818608	-9.33295	1.02968e-20	2.24578e-18
CNAG_07970	6434.93	-0.763952	0.174825	-4.3698	1.24359e-05	7.86783e-05
CNAG_07516	122.474	-0.763569	0.210128	-3.63383	0.00027925	0.00115837
CNAG_01148	26693.2	-0.763419	0.140728	-5.42478	5.80256e-08	7.08271e-07
CNAG_05222	5922.05	-0.763377	0.192022	-3.97547	7.02406e-05	0.000353678
CNAG_02573	1799.72	-0.763311	0.160391	-4.75907	1.94486e-06	1.60708e-05
CNAG_05908	2154.65	-0.762954	0.3297	-2.31408	0.0206632	0.0454986
CNAG_01941	6812.69	-0.762901	0.179573	-4.24842	2.15282e-05	0.000127356
CNAG_01467	4969.95	-0.762611	0.13153	-5.79802	6.71036e-09	1.07482e-07
CNAG_12637	9.14296	-0.762191	0.473448	-1.60987	0.107426	0.180451
CNAG_04783	7955.16	-0.761944	0.16522	-4.6117	3.9938e-06	2.97133e-05
CNAG_12756	213.345	-0.760433	0.224234	-3.39125	0.000695759	0.00254787
CNAG_12808	875.821	-0.760175	0.14584	-5.21239	1.86419e-07	2.00135e-06
CNAG_06902	10622.9	-0.759586	0.240131	-3.16322	0.00156037	0.0050625
CNAG_03061	7276.56	-0.7595	0.20794	-3.6525	0.000259696	0.00109035
CNAG_03624	25444.1	-0.758685	0.173517	-4.37241	1.22885e-05	7.78976e-05
CNAG_05558	10764.4	-0.758393	0.258793	-2.9305	0.00338419	0.00973895
CNAG_02331	44087.6	-0.757891	0.122146	-6.20478	5.4774e-10	1.16701e-08
CNAG_13199	99.9019	-0.757636	0.295504	-2.56388	0.0103511	0.0253291
CNAG_12533	3.79692	-0.757428	0.455847	-1.66158	0.0965961	0.165445
CNAG_06003	412.688	-0.755395	0.193975	-3.8943	9.84831e-05	0.000470177
CNAG_07560	1178.44	-0.754319	0.157548	-4.78788	1.6855e-06	1.41412e-05
CNAG_06821	8279.6	-0.752696	0.148628	-5.06429	4.09917e-07	4.03012e-06
CNAG_02125	918.293	-0.751311	0.131206	-5.7262	1.02707e-08	1.55905e-07
CNAG_03414	1513.81	-0.750704	0.166839	-4.49957	6.80916e-06	4.69318e-05
CNAG_05749	2643.78	-0.750216	0.232589	-3.22551	0.00125751	0.00420589
CNAG_12705	17.5785	-0.748965	0.408025	-1.83559	0.0664185	0.121137
CNAG_12013	851.26	-0.748768	0.21678	-3.45404	0.000552258	0.00208905
CNAG_13025	217.106	-0.747814	0.226938	-3.29524	0.000983389	0.00342307
CNAG_07855	20075.9	-0.747378	0.183414	-4.07482	4.60498e-05	0.000244029
CNAG_02202	6695.52	-0.745381	0.105686	-7.05282	1.75333e-12	6.69659e-11
CNAG_12415	1869.9	-0.74482	0.130831	-5.69301	1.24822e-08	1.84407e-07
CNAG_05453	1349.56	-0.743677	0.149346	-4.97957	6.37251e-07	5.96784e-06
CNAG_03789	12961.8	-0.742955	0.154637	-4.8045	1.55135e-06	1.31603e-05
CNAG_00268	22525.1	-0.742883	0.130642	-5.68641	1.29737e-08	1.90311e-07
CNAG_12275	13.3005	-0.742705	0.433993	-1.71133	0.08702	0.15174
CNAG_06997	10693.1	-0.742411	0.15732	-4.71911	2.36882e-06	1.89872e-05
CNAG_02064	11267.5	-0.741429	0.176964	-4.18972	2.793e-05	0.000159424
CNAG_00394	1665.98	-0.740933	0.249505	-2.96961	0.00298182	0.00877292
CNAG_00991	3847.48	-0.738859	0.155334	-4.75659	1.96891e-06	1.62371e-05
CNAG_03263	38658.1	-0.737316	0.134009	-5.50199	3.75526e-08	4.84037e-07
CNAG_02703	10064.9	-0.736801	0.16086	-4.58039	4.64115e-06	3.34776e-05
CNAG_03482	33806.2	-0.736708	0.0971007	-7.58706	3.27253e-14	2.0393e-12
CNAG_01600	9738.75	-0.735992	0.143574	-5.12622	2.95622e-07	2.99891e-06
CNAG_05571	23356.6	-0.734275	0.207757	-3.53429	0.00040887	0.00160557
CNAG_05391	4717.14	-0.732176	0.223644	-3.27384	0.00106097	0.00364262
CNAG_00770	6787.94	-0.731393	0.196592	-3.72036	0.000198943	0.000869181
CNAG_12692	121.665	-0.730883	0.226885	-3.22137	0.00127577	0.00425669
CNAG_03955	5161.75	-0.730589	0.14742	-4.95582	7.20241e-07	6.6548e-06
CNAG_02884	1897.78	-0.729712	0.176952	-4.12379	3.72693e-05	0.000203216
CNAG_00906	17317.5	-0.728984	0.17314	-4.21037	2.54953e-05	0.000147693
CNAG_12657	846.363	-0.727638	0.144605	-5.03191	4.85623e-07	4.67462e-06
CNAG_07979	4150.5	-0.727363	0.178458	-4.07583	4.58498e-05	0.000243124
CNAG_04370	17362.9	-0.727184	0.223558	-3.25277	0.00114285	0.00387523
CNAG_03929	4184.81	-0.727072	0.192477	-3.77745	0.000158444	0.000711754
CNAG_02539	12443.6	-0.726921	0.170573	-4.26164	2.02933e-05	0.000120914
CNAG_01903	2455.85	-0.726635	0.243529	-2.98377	0.00284718	0.00844574
CNAG_04459	1775.3	-0.726519	0.303973	-2.39008	0.0168448	0.038407
CNAG_06252	7662.56	-0.726153	0.181412	-4.00279	6.26002e-05	0.000319674
CNAG_03047	3142.81	-0.725897	0.178296	-4.0713	4.67516e-05	0.000247194
CNAG_04169	1553.66	-0.725606	0.189542	-3.8282	0.000129083	0.000593694
CNAG_01493	1393.29	-0.725307	0.417608	-1.73681	0.0824199	0.145401
CNAG_00774	11582.1	-0.725103	0.127181	-5.70134	1.18867e-08	1.76553e-07
CNAG_02839	1310.35	-0.724157	0.173999	-4.16186	3.1567e-05	0.000177048
CNAG_03781	4748.59	-0.724122	0.218424	-3.31522	0.000915716	0.00321835
CNAG_07690	10200.9	-0.723832	0.13925	-5.19806	2.01379e-07	2.14253e-06
CNAG_02670	3452.92	-0.723638	0.213345	-3.39187	0.000694179	0.00254348
CNAG_00930	34462.9	-0.722391	0.135827	-5.31847	1.04646e-07	1.19463e-06
CNAG_01964	1818.1	-0.722241	0.118611	-6.08915	1.1351e-09	2.19294e-08
CNAG_01884	109794	-0.720997	0.095936	-7.5154	5.67369e-14	3.335e-12
CNAG_03310	2899.55	-0.720974	0.150839	-4.77977	1.75497e-06	1.46477e-05
CNAG_01628	28474.1	-0.720855	0.0838179	-8.60025	7.95449e-18	9.28546e-16
CNAG_12003	566.232	-0.719768	0.310457	-2.31842	0.0204267	0.0450257
CNAG_04822	2768.18	-0.719643	0.132628	-5.42602	5.76254e-08	7.06019e-07
CNAG_04297	3727.59	-0.719642	0.20686	-3.47888	0.000503512	0.00192842
CNAG_02910	7406	-0.71717	0.224255	-3.19801	0.0013838	0.00457843
CNAG_05522	13126.9	-0.717035	0.0882212	-8.12769	4.37532e-16	3.77736e-14
CNAG_12087	4225.15	-0.717034	0.160216	-4.47542	7.62622e-06	5.1639e-05
CNAG_03891	35895.1	-0.716389	0.140821	-5.08724	3.63314e-07	3.60616e-06
CNAG_06758	26211.2	-0.716252	0.157205	-4.55618	5.20931e-06	3.71555e-05
CNAG_12074	82.3667	-0.716224	0.350506	-2.0434	0.0410132	0.0811258
CNAG_05344	7774.33	-0.716129	0.127713	-5.60733	2.05471e-08	2.88949e-07
CNAG_06248	17899.6	-0.714698	0.129235	-5.53022	3.19825e-08	4.20747e-07
CNAG_01755	14226.8	-0.714499	0.158172	-4.51724	6.26519e-06	4.36719e-05
CNAG_12849	22.0795	-0.714367	0.349807	-2.04218	0.0411342	0.0813069
CNAG_05699	1922.57	-0.71285	0.205303	-3.47219	0.000516232	0.00196805
CNAG_02917	9311.1	-0.712809	0.117922	-6.04475	1.49642e-09	2.80682e-08
CNAG_01353	3056.46	-0.712618	0.19285	-3.69518	0.00021973	0.00094261
CNAG_12012	29.52	-0.712477	0.378043	-1.88464	0.0594779	0.110627
CNAG_06379	15785.5	-0.711568	0.178188	-3.99334	6.51483e-05	0.000331257
CNAG_07539	7912.27	-0.710868	0.169616	-4.19104	2.77674e-05	0.000158715
CNAG_00719	13880.1	-0.707845	0.156899	-4.51148	6.43778e-06	4.47245e-05
CNAG_02235	2574.74	-0.707205	0.101619	-6.95941	3.41704e-12	1.20002e-10
CNAG_06573	7124.82	-0.707096	0.214538	-3.29591	0.000981051	0.00341636
CNAG_02754	54734.3	-0.70699	0.115371	-6.128	8.89925e-10	1.77301e-08
CNAG_05800	33544.9	-0.706708	0.114875	-6.15199	7.65187e-10	1.5468e-08
CNAG_07413	30337.2	-0.706594	0.181885	-3.88483	0.000102401	0.00048525
CNAG_01664	9749.43	-0.706448	0.122163	-5.78282	7.34575e-09	1.16661e-07
CNAG_04004	84356.3	-0.706408	0.0986821	-7.15842	8.16137e-13	3.43358e-11
CNAG_01013	3063.52	-0.705265	0.105079	-6.71176	1.92293e-11	5.85927e-10
CNAG_04506	281.964	-0.705175	0.20629	-3.41837	0.000629966	0.00234764
CNAG_12158	7.48926	-0.70504	0.437663	-1.61092	0.107197	0.18016
CNAG_01877	28612.4	-0.704785	0.157734	-4.46819	7.88838e-06	5.30243e-05
CNAG_12335	794.661	-0.704218	0.169977	-4.14301	3.42775e-05	0.000189142
CNAG_12777	57.5059	-0.703446	0.443826	-1.58496	0.112976	0.188014
CNAG_06729	1475.84	-0.703109	0.120663	-5.82706	5.64139e-09	9.16781e-08
CNAG_00258	5974.08	-0.702944	0.216941	-3.24026	0.00119422	0.00402673
CNAG_04086	106.854	-0.701499	0.255042	-2.75053	0.00594995	0.0158309
CNAG_06318	9425.94	-0.700814	0.153279	-4.57214	4.8277e-06	3.47025e-05
CNAG_05762	47295.1	-0.700763	0.120276	-5.82628	5.66776e-09	9.19264e-08
CNAG_12937	14.6609	-0.700468	0.410043	-1.70828	0.0875846	0.1525
CNAG_04342	29.8758	-0.699717	0.284637	-2.45828	0.0139605	0.0327469
CNAG_01152	61935.7	-0.699228	0.0935203	-7.47675	7.61807e-14	4.07345e-12
CNAG_01623	5424.89	-0.697683	0.156176	-4.46727	7.92227e-06	5.32089e-05
CNAG_01768	10589.9	-0.697294	0.142713	-4.88599	1.02911e-06	9.12172e-06
CNAG_00026	7020.85	-0.697089	0.115124	-6.05513	1.40302e-09	2.66091e-08
CNAG_04147	7716.09	-0.696753	0.146858	-4.74439	2.09131e-06	1.71272e-05
CNAG_02328	16417.1	-0.696042	0.19619	-3.5478	0.000388464	0.0015372
CNAG_01890	82856.2	-0.695996	0.149354	-4.66006	3.16122e-06	2.39857e-05
CNAG_04331	79.7992	-0.695761	0.247354	-2.81282	0.00491093	0.0134418
CNAG_01812	13410.8	-0.694401	0.144951	-4.7906	1.66284e-06	1.39915e-05
CNAG_01118	1118.12	-0.694135	0.352864	-1.96715	0.0491664	0.0941087
CNAG_02997	4508.02	-0.694038	0.219656	-3.15966	0.00157953	0.00511774
CNAG_00481	1.79022	-0.693669	0.442691	-1.56694	0.11713	0.193496
CNAG_05184	133.605	-0.693579	0.199641	-3.47414	0.000512497	0.00195651
CNAG_01486	55825.2	-0.693382	0.0987523	-7.02143	2.1961e-12	8.13568e-11
CNAG_12959	649.954	-0.693243	0.175404	-3.95226	7.74172e-05	0.000383065
CNAG_07605	5345.04	-0.692868	0.223362	-3.102	0.00192218	0.00606205
CNAG_04243	10225.4	-0.691857	0.218399	-3.16786	0.00153567	0.00499122
CNAG_04694	17629	-0.691381	0.138205	-5.00257	5.65724e-07	5.35853e-06
CNAG_01143	4577.67	-0.69116	0.143836	-4.80521	1.5459e-06	1.31275e-05
CNAG_04899	3597.46	-0.690769	0.130634	-5.28782	1.23781e-07	1.38634e-06
CNAG_12984	56.8167	-0.690332	0.252577	-2.73316	0.00627303	0.0165629
CNAG_02822	16584.9	-0.689571	0.155775	-4.4267	9.56868e-06	6.23959e-05
CNAG_06535	13442.5	-0.688949	0.146946	-4.68846	2.75266e-06	2.14822e-05
CNAG_05661	8937.83	-0.688584	0.165722	-4.15505	3.25214e-05	0.000181537
CNAG_03053	41604.4	-0.687994	0.093888	-7.32781	2.33936e-13	1.12073e-11
CNAG_05814	38853.3	-0.687843	0.108819	-6.32098	2.59914e-10	6.01723e-09
CNAG_03747	44145.1	-0.686543	0.100119	-6.85726	7.0195e-12	2.33645e-10
CNAG_02285	19968.3	-0.686166	0.0875882	-7.834	4.72591e-15	3.49718e-13
CNAG_06447	46318.4	-0.685169	0.0947561	-7.23087	4.79924e-13	2.1385e-11
CNAG_07327	1670.48	-0.684951	0.134678	-5.08583	3.66025e-07	3.62853e-06
CNAG_05156	11246.8	-0.683933	0.147588	-4.63407	3.58546e-06	2.69413e-05
CNAG_03168	45959.3	-0.682813	0.160175	-4.26292	2.01769e-05	0.00012048
CNAG_13156	66.5568	-0.682703	0.32797	-2.0816	0.037379	0.0749388
CNAG_02144	76043.8	-0.68217	0.0923196	-7.38922	1.47696e-13	7.41881e-12
CNAG_13076	4.87285	-0.68214	0.482997	-1.41231	0.15786	0.246747
CNAG_05439	2855.92	-0.681998	0.121615	-5.60785	2.04858e-08	2.88752e-07
CNAG_04215	73571.4	-0.68184	0.152063	-4.48392	7.32854e-06	4.9881e-05
CNAG_04068	21452.4	-0.681268	0.0967914	-7.03852	1.94295e-12	7.31962e-11
CNAG_06674	3824.08	-0.681253	0.203046	-3.35517	0.000793169	0.00285817
CNAG_12804	14.0869	-0.681187	0.47443	-1.4358	0.151059	0.237792
CNAG_05519	2196.25	-0.680727	0.180674	-3.76771	0.000164752	0.00073594
CNAG_00070	35569.7	-0.680452	0.109536	-6.21216	5.22618e-10	1.12505e-08
CNAG_03250	3663.87	-0.680393	0.129764	-5.24331	1.57719e-07	1.73827e-06
CNAG_03342	11330.7	-0.679788	0.152648	-4.4533	8.4559e-06	5.61558e-05
CNAG_00672	43188.5	-0.678756	0.0936568	-7.24727	4.25243e-13	1.93649e-11
CNAG_00334	147357	-0.678747	0.107428	-6.31813	2.6474e-10	6.0949e-09
CNAG_07917	11699.7	-0.678454	0.199931	-3.39343	0.000690224	0.00253011
CNAG_01233	10225.9	-0.678413	0.218784	-3.10084	0.00192976	0.00607437
CNAG_12980	17.4261	-0.678119	0.355922	-1.90525	0.0567478	0.10636
CNAG_12988	573.326	-0.678097	0.130185	-5.20872	1.90149e-07	2.03087e-06
CNAG_00655	37431.3	-0.677126	0.110706	-6.11644	9.56917e-10	1.88383e-08
CNAG_02928	69836.7	-0.676925	0.0872125	-7.76179	8.37388e-15	5.93186e-13
CNAG_02209	22609.4	-0.676306	0.139224	-4.85767	1.18774e-06	1.03621e-05
CNAG_02293	4410.37	-0.676208	0.172475	-3.92062	8.83232e-05	0.00042824
CNAG_03403	1128.26	-0.676126	0.0818122	-8.26436	1.40442e-16	1.35347e-14
CNAG_12929	1560.47	-0.676054	0.183837	-3.67746	0.000235566	0.000999677
CNAG_05085	9285.3	-0.676002	0.170321	-3.96899	7.21772e-05	0.000362548
CNAG_04130	6303.7	-0.675253	0.208731	-3.23504	0.00121625	0.00409267
CNAG_07505	237.911	-0.674956	0.218391	-3.09059	0.00199759	0.00624519
CNAG_06844	245.045	-0.674405	0.222671	-3.02871	0.002456	0.00744799
CNAG_07355	2893.29	-0.674062	0.132469	-5.08847	3.60967e-07	3.5972e-06
CNAG_05260	13237.9	-0.673865	0.128827	-5.23076	1.68815e-07	1.83855e-06
CNAG_03974	8547.55	-0.673239	0.103139	-6.52751	6.68724e-11	1.83523e-09
CNAG_02563	8949.62	-0.673236	0.22208	-3.0315	0.0024334	0.0073927
CNAG_02338	37269.1	-0.672963	0.0880092	-7.6465	2.06519e-14	1.33721e-12
CNAG_05458	8871.37	-0.672493	0.206534	-3.25608	0.00112961	0.00384485
CNAG_04129	551.291	-0.672235	0.122362	-5.4938	3.93365e-08	5.02211e-07
CNAG_00886	53311.3	-0.671803	0.177079	-3.7938	0.000148358	0.00067044
CNAG_00743	6775.81	-0.671495	0.142316	-4.71833	2.37785e-06	1.90412e-05
CNAG_01951	37592.3	-0.671467	0.101517	-6.61434	3.73217e-11	1.08155e-09
CNAG_00520	20738.1	-0.671466	0.154983	-4.33252	1.47411e-05	9.15164e-05
CNAG_06538	5736.41	-0.671445	0.181496	-3.6995	0.000216026	0.000928162
CNAG_01131	3918.08	-0.670917	0.121546	-5.51984	3.39307e-08	4.43561e-07
CNAG_01335	8406.96	-0.670361	0.237665	-2.82062	0.00479316	0.0131629
CNAG_02583	3550.78	-0.669915	0.176218	-3.80163	0.000143749	0.000653892
CNAG_01276	15766.3	-0.66946	0.19142	-3.49734	0.000469926	0.00181489
CNAG_02776	755.791	-0.669388	0.10545	-6.34792	2.18244e-10	5.18282e-09
CNAG_00300	8594.96	-0.66937	0.148964	-4.49351	7.00586e-06	4.81464e-05
CNAG_05145	5307.94	-0.668872	0.185844	-3.5991	0.000319318	0.00130049
CNAG_00386	20930.3	-0.668054	0.155883	-4.28561	1.82235e-05	0.000110407
CNAG_03080	18311.2	-0.666632	0.143884	-4.63311	3.60222e-06	2.70427e-05
CNAG_04576	2716.94	-0.666577	0.129854	-5.13329	2.84727e-07	2.92057e-06
CNAG_04799	44539.2	-0.66655	0.120336	-5.53908	3.04065e-08	4.0257e-07
CNAG_03724	22956.1	-0.666452	0.177413	-3.75649	0.000172312	0.000765373
CNAG_02185	4273.28	-0.666285	0.147167	-4.52742	5.97084e-06	4.19732e-05
CNAG_02889	186.672	-0.665973	0.315102	-2.11352	0.0345565	0.070335
CNAG_05130	2566.3	-0.664973	0.155386	-4.27949	1.87322e-05	0.000113076
CNAG_02234	63628.5	-0.664886	0.090131	-7.37689	1.62031e-13	8.08982e-12
CNAG_03577	68614.2	-0.664599	0.0812283	-8.18187	2.79474e-16	2.54536e-14
CNAG_12476	41.0928	-0.664582	0.420964	-1.57871	0.114402	0.189936
CNAG_05520	1156.47	-0.664555	0.189088	-3.51453	0.000440535	0.00171819
CNAG_06319	489.683	-0.663608	0.168567	-3.93677	8.2586e-05	0.000404774
CNAG_06897	19023.6	-0.663163	0.195591	-3.39055	0.000697526	0.00255124
CNAG_05854	1828.51	-0.662471	0.171914	-3.8535	0.000116442	0.000543366
CNAG_01550	2930.6	-0.661353	0.146745	-4.50681	6.58101e-06	4.55928e-05
CNAG_04446	962.73	-0.661256	0.137387	-4.81308	1.48618e-06	1.26723e-05
CNAG_00419	1044.71	-0.661168	0.157341	-4.20214	2.64399e-05	0.000152388
CNAG_12228	114.084	-0.661011	0.283945	-2.32795	0.0199146	0.0441789
CNAG_12174	124.62	-0.660782	0.193595	-3.41321	0.000642017	0.00238078
CNAG_06724	4374.97	-0.660354	0.204846	-3.22367	0.0012656	0.00422614
CNAG_04072	9113.94	-0.659139	0.157788	-4.17737	2.949e-05	0.000166886
CNAG_05415	2915.3	-0.657748	0.205896	-3.19456	0.00140045	0.00461142
CNAG_13190	40.9952	-0.657668	0.383672	-1.71414	0.0865027	0.151125
CNAG_05409	3360.98	-0.657476	0.149462	-4.39895	1.08776e-05	6.98325e-05
CNAG_00613	3615.03	-0.657294	0.119598	-5.49587	3.88795e-08	4.98042e-07
CNAG_01819	1913.84	-0.657118	0.242361	-2.71131	0.00670172	0.0175217
CNAG_06752	4732.82	-0.656927	0.119711	-5.48759	4.07454e-08	5.17149e-07
CNAG_02378	16128.8	-0.656815	0.10777	-6.09458	1.09724e-09	2.12972e-08
CNAG_03820	14610.4	-0.656784	0.173021	-3.79598	0.00014706	0.0006653
CNAG_01761	20569.4	-0.65665	0.194001	-3.38477	0.000712385	0.002593
CNAG_01224	62001.1	-0.656442	0.104102	-6.30573	2.8684e-10	6.49544e-09
CNAG_05400	6824.37	-0.655442	0.107111	-6.11928	9.39998e-10	1.85936e-08
CNAG_12395	60.9911	-0.655088	0.272612	-2.40301	0.0162609	0.0372706
CNAG_05904	47143.8	-0.654462	0.0956172	-6.8446	7.66889e-12	2.54239e-10
CNAG_13189	281.284	-0.654394	0.272274	-2.40344	0.0162416	0.0372367
CNAG_12581	107.53	-0.653911	0.199617	-3.27583	0.0010535	0.0036215
CNAG_06055	1775.87	-0.653861	0.0932474	-7.01211	2.34748e-12	8.53331e-11
CNAG_05513	3006.73	-0.653631	0.166261	-3.93135	8.44693e-05	0.000412006
CNAG_12236	12.8739	-0.653362	0.474961	-1.37561	0.168941	0.261189
CNAG_02036	2601.94	-0.65336	0.272839	-2.39468	0.0166351	0.0379916
CNAG_01136	7432	-0.651977	0.117383	-5.55425	2.78805e-08	3.758e-07
CNAG_12093	1017.41	-0.651113	0.157045	-4.14602	3.38299e-05	0.000187798
CNAG_05465	58144	-0.651013	0.0810905	-8.02823	9.88915e-16	7.80584e-14
CNAG_04762	79959.5	-0.65027	0.0833231	-7.8042	5.98797e-15	4.35336e-13
CNAG_12512	108.765	-0.650252	0.322739	-2.01479	0.0439262	0.085641
CNAG_04441	82336.6	-0.650216	0.100913	-6.44337	1.16852e-10	2.99835e-09
CNAG_01840	57441.9	-0.650038	0.12722	-5.10957	3.22889e-07	3.25956e-06
CNAG_01179	9824.61	-0.650007	0.147471	-4.40768	1.04482e-05	6.74414e-05
CNAG_12869	183.617	-0.649465	0.211136	-3.07605	0.0020976	0.00652094
CNAG_01197	5152.69	-0.649255	0.16521	-3.92989	8.49854e-05	0.000413842
CNAG_05547	7118.88	-0.648685	0.245632	-2.64088	0.00826898	0.0209253
CNAG_03617	9.6089	-0.648288	0.413609	-1.56739	0.117023	0.193386
CNAG_06468	29960.9	-0.647146	0.17616	-3.67363	0.00023913	0.00101325
CNAG_04259	11200.1	-0.646622	0.111911	-5.77803	7.55817e-09	1.19318e-07
CNAG_04356	7034.88	-0.646493	0.155129	-4.16746	3.08008e-05	0.000173494
CNAG_06706	2878.87	-0.646318	0.15733	-4.10805	3.99021e-05	0.000215165
CNAG_05609	7010.39	-0.646062	0.191565	-3.37254	0.000744775	0.00269432
CNAG_05028	11378.3	-0.64556	0.086861	-7.43211	1.06881e-13	5.6065e-12
CNAG_01990	62671.3	-0.644962	0.101653	-6.34477	2.22755e-10	5.27483e-09
CNAG_05823	992.791	-0.644873	0.211929	-3.04287	0.00234335	0.00715611
CNAG_03658	3679.97	-0.64467	0.144788	-4.45252	8.48701e-06	5.63173e-05
CNAG_00867	659.508	-0.64305	0.129385	-4.97004	6.69387e-07	6.21959e-06
CNAG_12996	176.033	-0.643005	0.201907	-3.18467	0.00144922	0.00474672
CNAG_06814	5286.48	-0.642065	0.0858709	-7.47709	7.59846e-14	4.07345e-12
CNAG_12248	1336.38	-0.640935	0.146319	-4.3804	1.18464e-05	7.53513e-05
CNAG_12318	226.356	-0.640496	0.264439	-2.42209	0.0154313	0.035685
CNAG_05556	20104.2	-0.640103	0.105095	-6.09071	1.1241e-09	2.17677e-08
CNAG_00656	80206.1	-0.639766	0.0907966	-7.04615	1.83933e-12	6.9924e-11
CNAG_04726	42367.3	-0.639214	0.0930417	-6.87019	6.41175e-12	2.17789e-10
CNAG_01704	46607.2	-0.63879	0.144079	-4.43359	9.26753e-06	6.06426e-05
CNAG_02840	991.34	-0.638285	0.209016	-3.05376	0.00225991	0.00694479
CNAG_05109	16311.1	-0.638224	0.105019	-6.07723	1.22274e-09	2.3513e-08
CNAG_12972	25.1482	-0.637464	0.345331	-1.84595	0.0648994	0.11887
CNAG_01174	32923	-0.637317	0.168939	-3.77247	0.000161638	0.000723748
CNAG_12967	2137.03	-0.636868	0.253829	-2.50904	0.0121059	0.0290234
CNAG_02925	37865.7	-0.636673	0.173409	-3.67152	0.000241116	0.0010201
CNAG_13155	76.6653	-0.63607	0.290379	-2.19048	0.0284892	0.0597239
CNAG_07953	1342.13	-0.636052	0.189814	-3.35091	0.000805452	0.00289352
CNAG_00779	34661.1	-0.635871	0.111035	-5.72678	1.02353e-08	1.55652e-07
CNAG_12888	208.732	-0.635727	0.241019	-2.63767	0.00834786	0.0211065
CNAG_03426	5371.04	-0.634997	0.202326	-3.13849	0.00169823	0.00543853
CNAG_12800	488.034	-0.634834	0.229461	-2.76663	0.00566381	0.0151768
CNAG_09001	4.4217	-0.63438	0.47352	-1.33971	0.180339	0.276071
CNAG_07362	43793.1	-0.634379	0.163862	-3.87142	0.000108202	0.000509824
CNAG_02361	6597.34	-0.633648	0.153744	-4.12146	3.76475e-05	0.000204772
CNAG_05401	11871.6	-0.633505	0.220886	-2.86802	0.00413055	0.0115734
CNAG_05228	8234.79	-0.633358	0.157758	-4.01474	5.95121e-05	0.00030522
CNAG_05940	8574.81	-0.63324	0.191545	-3.30595	0.000946538	0.0033059
CNAG_03018	4556.3	-0.632896	0.200207	-3.16121	0.00157113	0.0050945
CNAG_01528	4317.22	-0.632797	0.141507	-4.47185	7.75468e-06	5.22526e-05
CNAG_12308	6.49598	-0.632726	0.48274	-1.3107	0.18996	0.288402
CNAG_02317	4829.11	-0.632632	0.167148	-3.78486	0.000153793	0.00069236
CNAG_01474	2484.1	-0.632407	0.172285	-3.67071	0.00024188	0.00102228
CNAG_04365	22279.3	-0.632326	0.170225	-3.71465	0.000203485	0.000885291
CNAG_06811	26969	-0.632153	0.093916	-6.73104	1.6845e-11	5.17079e-10
CNAG_01153	38614.4	-0.630205	0.0976033	-6.4568	1.06941e-10	2.77846e-09
CNAG_00582	4827.95	-0.630168	0.0862774	-7.30397	2.7939e-13	1.33079e-11
CNAG_03603	11039.9	-0.629749	0.190229	-3.31049	0.00093134	0.0032635
CNAG_07709	11.4471	-0.629627	0.485303	-1.29739	0.194497	0.293677
CNAG_00737	3861.5	-0.628911	0.181806	-3.45925	0.000541687	0.00205657
CNAG_03344	952.183	-0.628572	0.16036	-3.91976	8.86384e-05	0.00042936
CNAG_06718	93.38	-0.627436	0.330638	-1.89765	0.0577422	0.107956
CNAG_12162	4.56376	-0.627203	0.481995	-1.30126	0.193169	0.292256
CNAG_01897	10506.3	-0.62677	0.115472	-5.42791	5.70164e-08	7.01115e-07
CNAG_03645	48190.9	-0.626484	0.192043	-3.2622	0.00110551	0.00377055
CNAG_06774	3713.57	-0.625789	0.175399	-3.5678	0.000359989	0.00144344
CNAG_00755	2011.57	-0.625757	0.213653	-2.92885	0.00340221	0.00978739
CNAG_03238	1177.59	-0.625668	0.130732	-4.78588	1.70237e-06	1.42486e-05
CNAG_01756	2464.54	-0.625059	0.153961	-4.05986	4.91028e-05	0.000258062
CNAG_05468	4854.9	-0.624888	0.20956	-2.98191	0.0028646	0.00848225
CNAG_13159	14.0405	-0.624111	0.482505	-1.29348	0.195845	0.295443
CNAG_13144	217.274	-0.623919	0.220493	-2.82965	0.00465984	0.0128564
CNAG_04963	90095	-0.623204	0.157957	-3.94541	7.96628e-05	0.000392769
CNAG_07518	1733.67	-0.622965	0.128188	-4.85977	1.17523e-06	1.02637e-05
CNAG_02143	2243.75	-0.622384	0.189346	-3.28702	0.00101254	0.00351127
CNAG_01480	39514.5	-0.621987	0.0960435	-6.4761	9.41231e-11	2.46865e-09
CNAG_01625	2445.5	-0.621387	0.149248	-4.16345	3.13474e-05	0.00017626
CNAG_02880	28135.6	-0.620665	0.0887251	-6.99537	2.64567e-12	9.53362e-11
CNAG_12442	107.985	-0.620586	0.241491	-2.56981	0.0101755	0.0249585
CNAG_02810	26820.1	-0.62042	0.161478	-3.84214	0.000121966	0.000564409
CNAG_00580	10924.5	-0.620143	0.169732	-3.65366	0.000258528	0.00108655
CNAG_00034	47364.2	-0.619872	0.090661	-6.83724	8.07308e-12	2.64465e-10
CNAG_00771	21372.2	-0.619736	0.0933868	-6.63622	3.21828e-11	9.42512e-10
CNAG_03455	3726.46	-0.619202	0.117057	-5.28973	1.22499e-07	1.37484e-06
CNAG_06545	6999.54	-0.618347	0.141526	-4.36912	1.24746e-05	7.88027e-05
CNAG_06314	20194.9	-0.618341	0.13898	-4.44914	8.62136e-06	5.69807e-05
CNAG_12731	354.507	-0.618131	0.237982	-2.59739	0.00939364	0.0232888
CNAG_02867	9185.62	-0.617904	0.108226	-5.70936	1.13403e-08	1.69348e-07
CNAG_06472	21501.9	-0.617521	0.156321	-3.95034	7.80406e-05	0.000385689
CNAG_12474	26.657	-0.617096	0.348808	-1.76916	0.0768679	0.137095
CNAG_01130	14677.8	-0.616619	0.140804	-4.37926	1.19083e-05	7.56868e-05
CNAG_12403	446.968	-0.616326	0.186995	-3.29594	0.000980922	0.00341636
CNAG_01849	209.016	-0.616056	0.188255	-3.27246	0.00106616	0.00365533
CNAG_00764	11211	-0.615912	0.168812	-3.64852	0.000263756	0.00110405
CNAG_03569	93.4499	-0.615759	0.266202	-2.31313	0.0207156	0.0455777
CNAG_02330	55572.2	-0.615098	0.0921105	-6.67784	2.42497e-11	7.28194e-10
CNAG_05031	7083.96	-0.614966	0.187738	-3.27566	0.00105416	0.00362225
CNAG_04600	7180.19	-0.614908	0.148599	-4.13803	3.50299e-05	0.000192781
CNAG_02857	13647	-0.614585	0.148902	-4.12746	3.66789e-05	0.000200524
CNAG_02449	4234	-0.614569	0.11934	-5.14972	2.60876e-07	2.70788e-06
CNAG_06766	13868.7	-0.613696	0.154233	-3.97901	6.92035e-05	0.000349518
CNAG_06222	43092.3	-0.613667	0.105277	-5.82908	5.5735e-09	9.09314e-08
CNAG_00127	3307.54	-0.613068	0.207958	-2.94803	0.00319804	0.00928059
CNAG_05769	2110.32	-0.612637	0.133245	-4.59784	4.26899e-06	3.12005e-05
CNAG_05232	89328	-0.610911	0.101672	-6.00867	1.87046e-09	3.43734e-08
CNAG_01815	7357.56	-0.610795	0.0813437	-7.50882	5.96619e-14	3.44569e-12
CNAG_00086	6723.12	-0.610448	0.167654	-3.64113	0.000271448	0.00113053
CNAG_00259	8135.67	-0.610446	0.159501	-3.82723	0.000129593	0.00059538
CNAG_03015	17046	-0.610046	0.108147	-5.64091	1.69158e-08	2.43823e-07
CNAG_04832	9315.31	-0.609388	0.192652	-3.16316	0.00156065	0.0050625
CNAG_02773	14259.1	-0.609385	0.167822	-3.63114	0.000282176	0.0011682
CNAG_06290	2299.86	-0.609157	0.251287	-2.42415	0.0153443	0.0355135
CNAG_06277	19819.5	-0.608835	0.174624	-3.48654	0.00048931	0.00188448
CNAG_05626	3521.15	-0.608771	0.127086	-4.79023	1.66589e-06	1.4003e-05
CNAG_03302	10637.5	-0.608221	0.178771	-3.40224	0.000668354	0.00246411
CNAG_06715	18.5456	-0.607804	0.327765	-1.85439	0.0636835	0.117083
CNAG_13135	26.9283	-0.607155	0.478048	-1.27007	0.20406	0.305059
CNAG_00640	98336.5	-0.607041	0.102465	-5.92436	3.1352e-09	5.42475e-08
CNAG_02120	7459.77	-0.607	0.14881	-4.07901	4.52275e-05	0.00024044
CNAG_00124	3744.99	-0.60682	0.140148	-4.32986	1.49206e-05	9.24231e-05
CNAG_07564	2376.36	-0.605849	0.136	-4.45476	8.39886e-06	5.58218e-05
CNAG_12578	29.4458	-0.6047	0.371218	-1.62896	0.103321	0.174974
CNAG_01030	1139.51	-0.604613	0.1684	-3.59034	0.000330242	0.00133717
CNAG_02546	10657.6	-0.604097	0.110421	-5.47082	4.47947e-08	5.62513e-07
CNAG_06448	395.973	-0.603769	0.118569	-5.09211	3.54092e-07	3.54007e-06
CNAG_12539	1256.83	-0.603614	0.227325	-2.65529	0.00792414	0.0201835
CNAG_00973	1904.61	-0.602806	0.123874	-4.8663	1.13708e-06	9.98318e-06
CNAG_01869	3259.06	-0.601834	0.140886	-4.27177	1.93928e-05	0.000116469
CNAG_01203	5748.83	-0.601733	0.175323	-3.43214	0.000598834	0.00224347
CNAG_06271	203.691	-0.60146	0.211822	-2.83945	0.0045191	0.012514
CNAG_05274	2948.51	-0.60079	0.166097	-3.6171	0.000297924	0.00122601
CNAG_03857	79994	-0.600112	0.117335	-5.11451	3.14551e-07	3.18314e-06
CNAG_03300	6108.31	-0.600006	0.144122	-4.16317	3.13864e-05	0.00017636
CNAG_03246	6770.17	-0.599213	0.144497	-4.14691	3.37e-05	0.000187579
CNAG_04021	31965.9	-0.598846	0.0940873	-6.36479	1.95561e-10	4.71166e-09
CNAG_12986	82.4324	-0.598529	0.272272	-2.19827	0.0279296	0.0587663
CNAG_05660	17411.2	-0.598267	0.159764	-3.74468	0.000180623	0.000795854
CNAG_03390	6064.63	-0.59825	0.153339	-3.90149	9.56027e-05	0.000458539
CNAG_07562	7873.11	-0.598226	0.193503	-3.09156	0.00199111	0.00622729
CNAG_02100	45234.7	-0.597972	0.175817	-3.40111	0.000671133	0.00247247
CNAG_03675	18981.2	-0.597672	0.174911	-3.417	0.000633146	0.00235632
CNAG_03441	3284.89	-0.59707	0.120277	-4.96412	6.90118e-07	6.40503e-06
CNAG_02944	3379.05	-0.596795	0.131234	-4.54756	5.42709e-06	3.8543e-05
CNAG_05254	4868.17	-0.596516	0.157992	-3.7756	0.000159621	0.000716144
CNAG_00923	2023.59	-0.595717	0.131592	-4.52699	5.98307e-06	4.19831e-05
CNAG_01559	6959.06	-0.5957	0.184047	-3.23667	0.00120933	0.00407105
CNAG_06401	2484.89	-0.594924	0.151002	-3.93983	8.15404e-05	0.000401072
CNAG_03867	4.63459	-0.594867	0.476813	-1.24759	0.212181	0.314982
CNAG_00441	46574.5	-0.593913	0.134946	-4.40113	1.07689e-05	6.91882e-05
CNAG_06353	9074.53	-0.593587	0.152745	-3.88613	0.000101855	0.000483425
CNAG_02198	370.714	-0.59352	0.198891	-2.98414	0.00284374	0.00843858
CNAG_05752	3198.34	-0.593496	0.213225	-2.78343	0.00537882	0.0145353
CNAG_12722	655.05	-0.592931	0.183363	-3.23364	0.00122222	0.00410612
CNAG_01133	1359.13	-0.592857	0.176693	-3.35528	0.000792834	0.00285817
CNAG_00475	4472.97	-0.592309	0.140975	-4.20151	2.65136e-05	0.000152707
CNAG_05976	20023.9	-0.590753	0.145001	-4.07413	4.61865e-05	0.000244441
CNAG_01285	4089.49	-0.590601	0.202259	-2.92002	0.00350011	0.0100273
CNAG_07988	6276.93	-0.59046	0.199541	-2.95909	0.00308552	0.00902039
CNAG_01332	37219.8	-0.589805	0.10341	-5.70354	1.17345e-08	1.74606e-07
CNAG_02724	3020.25	-0.589748	0.226113	-2.6082	0.00910204	0.0226796
CNAG_03846	2926.31	-0.588825	0.146179	-4.02812	5.62255e-05	0.000290885
CNAG_04324	3528.26	-0.58873	0.103014	-5.71504	1.09677e-08	1.64973e-07
CNAG_02666	2880.48	-0.58843	0.216643	-2.71613	0.00660496	0.0173218
CNAG_07960	1697.23	-0.588391	0.105029	-5.60218	2.11671e-08	2.9634e-07
CNAG_02508	1506.2	-0.587538	0.117706	-4.99155	5.98957e-07	5.64109e-06
CNAG_12606	52.6856	-0.587028	0.363784	-1.61367	0.106599	0.179426
CNAG_04700	2473.39	-0.587024	0.149618	-3.92347	8.72819e-05	0.000424028
CNAG_05202	9404.72	-0.586037	0.144863	-4.04544	5.22242e-05	0.000271881
CNAG_01167	7139.61	-0.585897	0.231767	-2.52796	0.0114727	0.0277137
CNAG_06342	2685.32	-0.58526	0.140682	-4.16016	3.18024e-05	0.000178093
CNAG_12434	286.881	-0.585109	0.135184	-4.32823	1.5031e-05	9.30272e-05
CNAG_00700	21433.7	-0.584832	0.136318	-4.29021	1.785e-05	0.000108302
CNAG_00077	23635.6	-0.58465	0.123154	-4.74729	2.06157e-06	1.69339e-05
CNAG_00992	36929.5	-0.584574	0.0898526	-6.50593	7.72147e-11	2.07105e-09
CNAG_06633	45961.2	-0.58456	0.0929741	-6.28734	3.22949e-10	7.2639e-09
CNAG_05538	5213.72	-0.583221	0.17643	-3.30568	0.000947449	0.00330769
CNAG_02720	29088.1	-0.582791	0.156407	-3.72612	0.000194453	0.000850016
CNAG_06935	7012.98	-0.582358	0.155363	-3.74838	0.000177984	0.000786736
CNAG_12575	43.1865	-0.581814	0.395478	-1.47117	0.141246	0.225863
CNAG_05093	166.711	-0.581559	0.283925	-2.04828	0.0405326	0.0803285
CNAG_12564	1759.89	-0.581036	0.178175	-3.26105	0.00111001	0.00378437
CNAG_02218	2907.36	-0.580996	0.292472	-1.9865	0.0469781	0.090674
CNAG_04919	2752.72	-0.580462	0.182028	-3.18885	0.00142838	0.00468847
CNAG_02259	5793.17	-0.580384	0.167198	-3.47123	0.000518083	0.00197419
CNAG_01437	8732.93	-0.580284	0.143274	-4.05016	5.11824e-05	0.000267465
CNAG_06860	9303.74	-0.58019	0.201621	-2.87764	0.00400668	0.0112644
CNAG_06302	1849.2	-0.580157	0.199678	-2.90546	0.00366714	0.010448
CNAG_07942	5850.44	-0.580011	0.174202	-3.32952	0.00086996	0.00308789
CNAG_00033	72.8918	-0.579227	0.277383	-2.08818	0.0367814	0.0739913
CNAG_00633	14616.4	-0.579098	0.147304	-3.93132	8.44804e-05	0.000412006
CNAG_02959	2882.93	-0.578432	0.174962	-3.30605	0.000946208	0.0033059
CNAG_04055	2901.13	-0.577226	0.104717	-5.51225	3.54285e-08	4.58798e-07
CNAG_00822	14033.8	-0.576775	0.11584	-4.97908	6.38878e-07	5.97632e-06
CNAG_04192	20901.5	-0.576587	0.162536	-3.54744	0.000388996	0.00153777
CNAG_03164	24.8601	-0.576544	0.341614	-1.68771	0.0914678	0.158165
CNAG_03159	1947.64	-0.576514	0.14659	-3.93283	8.39504e-05	0.00041049
CNAG_03636	3672.31	-0.576506	0.136475	-4.22428	2.39711e-05	0.000139812
CNAG_12881	42.8829	-0.576317	0.388418	-1.48375	0.137874	0.221325
CNAG_03385	43745.3	-0.57628	0.146589	-3.93126	8.45028e-05	0.000412006
CNAG_01477	11756.7	-0.576209	0.185953	-3.09868	0.00194385	0.00610946
CNAG_04231	3055.17	-0.576149	0.228087	-2.526	0.011537	0.0278446
CNAG_00914	16351.3	-0.575891	0.149502	-3.85205	0.000117132	0.000545082
CNAG_01300	20175.2	-0.575095	0.0978621	-5.87658	4.18817e-09	7.04088e-08
CNAG_00785	68601.2	-0.57482	0.100339	-5.7288	1.01144e-08	1.54096e-07
CNAG_01498	1844.79	-0.574756	0.124881	-4.60245	4.17557e-06	3.07346e-05
CNAG_05598	3936.62	-0.574703	0.133215	-4.3141	1.60254e-05	9.86033e-05
CNAG_04098	19949.3	-0.574647	0.208908	-2.75072	0.00594653	0.0158269
CNAG_05975	13510.3	-0.574245	0.124682	-4.60569	4.11094e-06	3.03397e-05
CNAG_02424	3031.89	-0.574187	0.143628	-3.99774	6.39508e-05	0.000325968
CNAG_12030	80.3087	-0.574067	0.301692	-1.90283	0.0570634	0.106856
CNAG_06713	6426.81	-0.573859	0.152313	-3.76763	0.000164805	0.00073594
CNAG_05525	41553.1	-0.573086	0.101209	-5.66241	1.49257e-08	2.17026e-07
CNAG_03762	21341.5	-0.572301	0.186675	-3.06576	0.00217121	0.00671914
CNAG_04884	28813.7	-0.572085	0.118529	-4.82655	1.3892e-06	1.19066e-05
CNAG_12001	298.074	-0.571514	0.167087	-3.42046	0.000625153	0.0023318
CNAG_02159	4420.89	-0.571379	0.137381	-4.15907	3.19549e-05	0.000178827
CNAG_12616	514.589	-0.570557	0.166929	-3.41797	0.00063091	0.0023501
CNAG_02930	7276.5	-0.570243	0.198984	-2.86577	0.00415994	0.0116478
CNAG_00870	2749.78	-0.57022	0.271478	-2.10043	0.0356909	0.0721654
CNAG_12147	220.738	-0.570127	0.18535	-3.07594	0.00209838	0.00652094
CNAG_04907	517.599	-0.569865	0.13074	-4.35877	1.30797e-05	8.20003e-05
CNAG_04629	5847.11	-0.56958	0.120175	-4.73959	2.14148e-06	1.74691e-05
CNAG_05918	164735	-0.569443	0.0562346	-10.1262	4.22713e-24	1.59248e-21
CNAG_02204	3380.89	-0.568739	0.102792	-5.53289	3.14999e-08	4.15719e-07
CNAG_00449	11131.3	-0.568055	0.148051	-3.83689	0.000124601	0.000575637
CNAG_04883	39934	-0.567941	0.10377	-5.47308	4.42273e-08	5.57076e-07
CNAG_00849	372.111	-0.567592	0.228482	-2.48419	0.0129847	0.0308359
CNAG_05590	38873.2	-0.567098	0.16281	-3.48319	0.000495476	0.00190204
CNAG_05346	1059.93	-0.566899	0.120977	-4.686	2.78599e-06	2.16607e-05
CNAG_05789	7644.82	-0.565679	0.14715	-3.84424	0.000120927	0.000560853
CNAG_06347	771694	-0.565388	0.121074	-4.66978	3.01522e-06	2.30324e-05
CNAG_07865	10649.6	-0.565115	0.106662	-5.29821	1.16946e-07	1.3205e-06
CNAG_01242	7202.75	-0.564701	0.150712	-3.74688	0.000179049	0.000790181
CNAG_06412	4142.29	-0.564609	0.143071	-3.94637	7.93465e-05	0.000391532
CNAG_00265	7158.78	-0.564147	0.158983	-3.54846	0.000387488	0.0015344
CNAG_01181	54392.1	-0.563934	0.101094	-5.57833	2.42832e-08	3.34318e-07
CNAG_06421	7691.85	-0.563789	0.0830079	-6.79198	1.10603e-11	3.53928e-10
CNAG_12941	10.0207	-0.56315	0.452864	-1.24353	0.213672	0.316461
CNAG_05234	7027.4	-0.56301	0.127402	-4.41916	9.90833e-06	6.43072e-05
CNAG_03003	1667.93	-0.562786	0.188121	-2.99161	0.00277507	0.00827832
CNAG_00821	27973	-0.562022	0.0968659	-5.80206	6.55034e-09	1.05416e-07
CNAG_01572	4054.66	-0.561971	0.139593	-4.02579	5.67843e-05	0.000293226
CNAG_10146	1.46114	-0.561483	0.450465	-1.24645	0.212598	0.315434
CNAG_01976	36080.1	-0.561411	0.104792	-5.35741	8.44237e-08	9.8968e-07
CNAG_01989	493.001	-0.561207	0.207205	-2.70847	0.00675946	0.0176504
CNAG_03956	3759.98	-0.561144	0.176954	-3.17113	0.00151845	0.00494495
CNAG_00116	52784.3	-0.560764	0.0857099	-6.54258	6.04656e-11	1.66491e-09
CNAG_03335	11452	-0.560714	0.149854	-3.74173	0.000182759	0.000803984
CNAG_04517	35.5794	-0.560152	0.388409	-1.44217	0.149254	0.235533
CNAG_00359	5121.44	-0.560093	0.22724	-2.46476	0.0137106	0.0322639
CNAG_07682	3365.43	-0.559934	0.23367	-2.39626	0.0165634	0.0378696
CNAG_05423	855.197	-0.559882	0.135521	-4.13133	3.60666e-05	0.000197829
CNAG_02376	3499.44	-0.559496	0.146901	-3.80866	0.000139721	0.000637319
CNAG_05597	2738.87	-0.559434	0.119448	-4.68351	2.82009e-06	2.18643e-05
CNAG_03922	298.094	-0.55933	0.145903	-3.83357	0.000126295	0.000583139
CNAG_00558	9798.93	-0.559226	0.183406	-3.04912	0.00229515	0.00703485
CNAG_05102	5576.97	-0.558716	0.187992	-2.97203	0.00295842	0.00872095
CNAG_05896	4372	-0.558116	0.172167	-3.24171	0.00118815	0.00401115
CNAG_00788	26730	-0.557609	0.112598	-4.95219	7.33832e-07	6.75778e-06
CNAG_03146	28487.2	-0.557167	0.128461	-4.33723	1.44288e-05	8.97794e-05
CNAG_12615	328.587	-0.557159	0.161777	-3.44399	0.000573203	0.00215843
CNAG_02382	12192.1	-0.556944	0.129492	-4.30098	1.70047e-05	0.000103858
CNAG_01273	10764	-0.55694	0.100608	-5.53574	3.09919e-08	4.09666e-07
CNAG_12322	301.987	-0.556663	0.246558	-2.25774	0.0239621	0.0514636
CNAG_01288	6585.65	-0.556374	0.151905	-3.66265	0.000249622	0.00105087
CNAG_03353	5429.78	-0.556081	0.107018	-5.19615	2.03461e-07	2.16191e-06
CNAG_01258	14726.4	-0.555555	0.173801	-3.1965	0.00139104	0.0045919
CNAG_12237	39.2716	-0.555194	0.322025	-1.72407	0.0846955	0.14872
CNAG_12681	40.4557	-0.554999	0.395275	-1.40408	0.160294	0.249862
CNAG_00256	10903.6	-0.554632	0.0865288	-6.40979	1.45716e-10	3.60506e-09
CNAG_12420	801.981	-0.554489	0.197801	-2.80327	0.00505877	0.0137873
CNAG_10503	9.2488	-0.554449	0.403445	-1.37429	0.169353	0.261719
CNAG_01291	7733.77	-0.55408	0.120789	-4.58716	4.49316e-06	3.25803e-05
CNAG_00818	10353.3	-0.553473	0.18995	-2.91378	0.00357087	0.0102088
CNAG_07432	3238.26	-0.553339	0.147176	-3.75971	0.000170112	0.000756783
CNAG_06280	6887.1	-0.553326	0.123722	-4.47231	7.73779e-06	5.21813e-05
CNAG_01238	7896.27	-0.553134	0.132059	-4.18855	2.80748e-05	0.00016014
CNAG_04350	6005.78	-0.552793	0.0832073	-6.64356	3.06187e-11	9.06312e-10
CNAG_03780	50981	-0.552692	0.106857	-5.17224	2.31305e-07	2.42359e-06
CNAG_05694	10018.3	-0.552641	0.0923163	-5.98639	2.14556e-09	3.85851e-08
CNAG_00707	8295.95	-0.552523	0.102242	-5.40407	6.51467e-08	7.85741e-07
CNAG_04521	1849.93	-0.55248	0.122092	-4.5251	6.0366e-06	4.22436e-05
CNAG_00703	31098.9	-0.552346	0.10726	-5.14959	2.61051e-07	2.70788e-06
CNAG_01574	20352.6	-0.552172	0.145043	-3.80696	0.000140685	0.000641012
CNAG_07363	11691.9	-0.552076	0.0667129	-8.27541	1.28015e-16	1.24822e-14
CNAG_05270	7265.23	-0.551811	0.154514	-3.57128	0.000355247	0.00142719
CNAG_12521	286.896	-0.551567	0.236218	-2.33499	0.0195437	0.0434841
CNAG_05980	5991.69	-0.551441	0.101079	-5.45555	4.88216e-08	6.09388e-07
CNAG_00775	8936.72	-0.550894	0.157006	-3.50875	0.000450221	0.00174877
CNAG_03265	3141.49	-0.550871	0.112258	-4.90717	9.24007e-07	8.28807e-06
CNAG_03510	29922.1	-0.5502	0.0937465	-5.86902	4.38376e-09	7.33991e-08
CNAG_03817	7983.06	-0.549922	0.148324	-3.70758	0.000209251	0.000905626
CNAG_05936	10895.7	-0.54975	0.184074	-2.98657	0.00282124	0.00838982
CNAG_03897	6004.87	-0.549733	0.111938	-4.91105	9.05892e-07	8.15204e-06
CNAG_03295	12745.6	-0.549412	0.31366	-1.75162	0.0798399	0.141573
CNAG_06383	2059.78	-0.549275	0.181161	-3.03197	0.00242963	0.0073851
CNAG_05501	1366.88	-0.54922	0.141216	-3.88922	0.000100565	0.00047874
CNAG_01140	11489.2	-0.549151	0.170729	-3.2165	0.00129764	0.00432443
CNAG_03301	4352.81	-0.548817	0.118037	-4.64952	3.32703e-06	2.51133e-05
CNAG_04340	3727.71	-0.548339	0.0784171	-6.9926	2.69847e-12	9.64005e-11
CNAG_01146	13125.5	-0.548145	0.188857	-2.90243	0.00370282	0.0105279
CNAG_00742	6377.27	-0.547678	0.168165	-3.25679	0.00112679	0.00383683
CNAG_00327	1304.56	-0.547671	0.19244	-2.84594	0.00442807	0.0123071
CNAG_06087	4760.76	-0.547583	0.252232	-2.17094	0.0299354	0.0622439
CNAG_07407	425.111	-0.54741	0.184217	-2.97154	0.00296308	0.00873018
CNAG_12965	28.5564	-0.547366	0.361167	-1.51555	0.129633	0.210172
CNAG_01744	36000.8	-0.54736	0.141931	-3.85652	0.000115013	0.000537633
CNAG_03163	3343.66	-0.546998	0.161314	-3.39089	0.000696655	0.00254917
CNAG_02516	4355.85	-0.546943	0.111388	-4.91025	9.096e-07	8.17653e-06
CNAG_05833	221.79	-0.546466	0.224057	-2.43896	0.0147298	0.0342922
CNAG_03583	3153.89	-0.546358	0.15292	-3.57284	0.000353125	0.00141935
CNAG_07878	19628.8	-0.546035	0.184629	-2.95747	0.0031017	0.0090613
CNAG_12054	121.235	-0.545848	0.277303	-1.96842	0.04902	0.0939788
CNAG_12482	307.849	-0.545742	0.290202	-1.88056	0.060032	0.111461
CNAG_02758	3907.35	-0.545433	0.165982	-3.28609	0.00101588	0.00351991
CNAG_05663	20907.9	-0.545202	0.244882	-2.22638	0.0259885	0.0552713
CNAG_12925	1016.83	-0.545198	0.473583	-1.15122	0.249642	0.35902
CNAG_03634	7466.24	-0.545175	0.134667	-4.04833	5.15852e-05	0.000269061
CNAG_02301	23618.4	-0.545103	0.127892	-4.26222	2.02409e-05	0.000120688
CNAG_03000	45250	-0.544894	0.102431	-5.31963	1.03978e-07	1.19128e-06
CNAG_06645	7033.18	-0.544283	0.141307	-3.85179	0.00011726	0.000545371
CNAG_06746	23690.8	-0.544028	0.124623	-4.36538	1.26902e-05	8.01037e-05
CNAG_00796	6348.27	-0.543778	0.15951	-3.40906	0.000651875	0.00241086
CNAG_12276	7.07579	-0.543755	0.480339	-1.13203	0.257624	0.368072
CNAG_05637	7178.51	-0.542668	0.105818	-5.12831	2.92359e-07	2.97674e-06
CNAG_00194	6422.28	-0.542657	0.182473	-2.9739	0.00294041	0.00867574
CNAG_03763	16657.3	-0.542182	0.225283	-2.40668	0.0160985	0.0369801
CNAG_03951	5139.94	-0.542087	0.174693	-3.10308	0.00191517	0.00604453
CNAG_06095	78207.2	-0.541978	0.0949858	-5.70588	1.15742e-08	1.7253e-07
CNAG_05759	37053.6	-0.541587	0.206073	-2.62813	0.00858565	0.0216088
CNAG_06456	7813.61	-0.541465	0.153893	-3.51846	0.000434067	0.00169776
CNAG_02823	7731.58	-0.541416	0.192039	-2.8193	0.00481288	0.0132039
CNAG_07399	68.2772	-0.541128	0.239171	-2.26252	0.0236655	0.0509586
CNAG_00911	51.702	-0.54108	0.35985	-1.50363	0.132677	0.214353
CNAG_00032	615.869	-0.540616	0.161722	-3.34287	0.000829182	0.00296859
CNAG_02942	7276.63	-0.540612	0.322132	-1.67823	0.0933013	0.160832
CNAG_04601	48332	-0.540419	0.104045	-5.19407	2.05742e-07	2.18055e-06
CNAG_03028	1035.94	-0.540211	0.147458	-3.66348	0.000248813	0.0010485
CNAG_07409	16379.5	-0.540153	0.170384	-3.17021	0.0015233	0.00495686
CNAG_06076	6738.01	-0.539378	0.0715092	-7.54278	4.60072e-14	2.7631e-12
CNAG_05750	145421	-0.539369	0.0613721	-8.78849	1.51581e-18	1.96297e-16
CNAG_12931	23.1295	-0.538786	0.439753	-1.2252	0.2205	0.324543
CNAG_13178	284.762	-0.538664	0.223928	-2.40553	0.016149	0.0370859
CNAG_04222	15597.7	-0.53831	0.184001	-2.92559	0.00343809	0.00987692
CNAG_01881	6284.49	-0.537863	0.116161	-4.63033	3.65079e-06	2.73578e-05
CNAG_12339	1318.13	-0.537748	0.145579	-3.69385	0.000220886	0.000946591
CNAG_06923	139930	-0.53753	0.211038	-2.54708	0.0108629	0.0263945
CNAG_00841	1169.92	-0.537497	0.179847	-2.98864	0.00280224	0.00834531
CNAG_02292	4356.19	-0.537467	0.0994372	-5.40509	6.47742e-08	7.82578e-07
CNAG_01723	4882.06	-0.537114	0.110883	-4.844	1.27254e-06	1.10207e-05
CNAG_04597	1675.54	-0.536397	0.180449	-2.97258	0.00295312	0.00871011
CNAG_00706	5992.19	-0.536329	0.154048	-3.48156	0.000498499	0.00191145
CNAG_03055	8202.42	-0.536231	0.152538	-3.51539	0.000439113	0.00171426
CNAG_02502	13566.9	-0.536124	0.166468	-3.22058	0.0012793	0.00426503
CNAG_05402	7477.21	-0.535798	0.129786	-4.12831	3.65442e-05	0.00019992
CNAG_06250	1727.11	-0.534991	0.112814	-4.74223	2.1138e-06	1.72944e-05
CNAG_05199	47395.3	-0.534884	0.108478	-4.9308	8.18955e-07	7.48346e-06
CNAG_00874	17083.5	-0.534727	0.135794	-3.93778	8.22396e-05	0.000403553
CNAG_04607	1869.02	-0.534308	0.130801	-4.08489	4.40984e-05	0.000235495
CNAG_05046	292.981	-0.534295	0.225865	-2.36555	0.0180033	0.0405575
CNAG_12957	314.105	-0.534228	0.177295	-3.01321	0.00258499	0.00778786
CNAG_13133	219.065	-0.534221	0.152721	-3.49803	0.000468713	0.00181189
CNAG_01404	27247.6	-0.533868	0.111666	-4.78094	1.74476e-06	1.45772e-05
CNAG_02811	13914.8	-0.53319	0.115979	-4.59728	4.28034e-06	3.12559e-05
CNAG_06500	2327.09	-0.533155	0.103882	-5.13229	2.86239e-07	2.92883e-06
CNAG_06145	5303.92	-0.533033	0.153513	-3.47224	0.000516132	0.00196805
CNAG_12451	44.9231	-0.533003	0.270915	-1.96742	0.0491349	0.094091
CNAG_02588	941.199	-0.532919	0.121812	-4.37494	1.21465e-05	7.70829e-05
CNAG_00786	1238.82	-0.532122	0.154571	-3.44259	0.000576179	0.00216865
CNAG_07661	2360.7	-0.53144	0.107626	-4.93787	7.89823e-07	7.23321e-06
CNAG_01397	8892.48	-0.531316	0.117117	-4.53664	5.71577e-06	4.04546e-05
CNAG_04730	6936.31	-0.53081	0.136571	-3.88669	0.000101622	0.000482939
CNAG_05394	3479.45	-0.530761	0.168069	-3.15798	0.00158864	0.00513922
CNAG_05473	4148.01	-0.530251	0.146327	-3.62375	0.00029036	0.00119965
CNAG_06889	5807.84	-0.530193	0.193196	-2.74432	0.00606363	0.0161023
CNAG_01564	10288.5	-0.530094	0.136789	-3.87526	0.000106513	0.00050215
CNAG_00776	61285	-0.529919	0.224194	-2.36367	0.0180951	0.0407202
CNAG_07985	783.238	-0.529617	0.269073	-1.9683	0.0490337	0.0939788
CNAG_05662	12051.9	-0.529554	0.394758	-1.34146	0.17977	0.275352
CNAG_01593	11585.9	-0.528327	0.125539	-4.20846	2.57116e-05	0.000148707
CNAG_04011	26347.6	-0.527905	0.11752	-4.49203	7.05478e-06	4.84238e-05
CNAG_02714	47912.1	-0.527383	0.0688257	-7.66259	1.82224e-14	1.18919e-12
CNAG_07657	9364.98	-0.527332	0.179034	-2.94544	0.003225	0.00934575
CNAG_01792	9347.46	-0.52729	0.166296	-3.17078	0.00152028	0.00494896
CNAG_12464	2.23922	-0.527031	0.410593	-1.28359	0.199286	0.299816
CNAG_04513	10173.2	-0.527016	0.182277	-2.89129	0.00383664	0.0108526
CNAG_00513	11528.4	-0.526935	0.160069	-3.29193	0.000995037	0.00345781
CNAG_04445	45434	-0.526347	0.0837066	-6.288	3.21585e-10	7.26239e-09
CNAG_04007	44.0005	-0.525507	0.472979	-1.11106	0.266544	0.378209
CNAG_04385	31.3505	-0.525493	0.343028	-1.53192	0.125542	0.204619
CNAG_04298	14797.1	-0.52496	0.184546	-2.8446	0.00444673	0.0123507
CNAG_01275	5895.37	-0.524609	0.174415	-3.00782	0.00263128	0.00790719
CNAG_01014	5848.65	-0.524582	0.0853527	-6.14605	7.9436e-10	1.60186e-08
CNAG_12706	125.393	-0.524361	0.40083	-1.30819	0.19081	0.28948
CNAG_12724	263.047	-0.5242	0.164772	-3.18136	0.00146584	0.00478869
CNAG_01123	5018.76	-0.524073	0.175198	-2.99131	0.00277785	0.00828159
CNAG_05086	2109.93	-0.523324	0.155918	-3.3564	0.000789643	0.00284794
CNAG_04236	5124.11	-0.523289	0.135958	-3.8489	0.000118648	0.0005509
CNAG_05435	2610.68	-0.523146	0.172661	-3.0299	0.00244636	0.00742418
CNAG_06231	49939.2	-0.523102	0.0825948	-6.33335	2.399e-10	5.58508e-09
CNAG_05905	6223.86	-0.522398	0.131896	-3.96069	7.4734e-05	0.00037134
CNAG_00545	6041.85	-0.522188	0.184516	-2.83004	0.00465419	0.0128451
CNAG_01749	3465.3	-0.521656	0.149612	-3.48673	0.000488967	0.00188403
CNAG_00236	760.709	-0.521628	0.178412	-2.92373	0.00345865	0.00992909
CNAG_06115	2335.9	-0.520068	0.124499	-4.1773	2.9499e-05	0.000166886
CNAG_02128	12705.2	-0.519337	0.0872211	-5.95426	2.61253e-09	4.61678e-08
CNAG_00104	42909.5	-0.519282	0.167457	-3.10098	0.00192881	0.00607437
CNAG_04312	11480	-0.519272	0.0864963	-6.0034	1.93229e-09	3.5431e-08
CNAG_04696	2499.53	-0.518102	0.215776	-2.40111	0.0163455	0.0374335
CNAG_13002	78.1469	-0.517927	0.26519	-1.95304	0.0508144	0.0968089
CNAG_03264	3958.88	-0.51785	0.110031	-4.70638	2.5215e-06	2.00558e-05
CNAG_05705	2559.44	-0.517542	0.125297	-4.13053	3.61929e-05	0.00019826
CNAG_12665	50.8081	-0.51686	0.32612	-1.58488	0.112995	0.188014
CNAG_06705	517.109	-0.516764	0.132002	-3.91481	9.04759e-05	0.000436496
CNAG_06818	1401.38	-0.516375	0.143888	-3.58874	0.000332282	0.00134339
CNAG_02869	1544.83	-0.516366	0.240132	-2.15034	0.0315286	0.0651156
CNAG_07857	12264.5	-0.515865	0.0834779	-6.17966	6.4239e-10	1.33772e-08
CNAG_07851	12115.9	-0.515793	0.0835433	-6.17396	6.6599e-10	1.37993e-08
CNAG_01361	18330.8	-0.515672	0.124677	-4.13605	3.53337e-05	0.000194066
CNAG_06948	12695.7	-0.515509	0.150094	-3.43457	0.000593491	0.00222742
CNAG_06741	14373.7	-0.515269	0.196661	-2.62008	0.00879086	0.022025
CNAG_00122	2747.25	-0.515227	0.235165	-2.19092	0.0284578	0.0596808
CNAG_12468	29.051	-0.514867	0.425288	-1.21063	0.226037	0.331106
CNAG_03476	17741.9	-0.514541	0.109786	-4.68675	2.77575e-06	2.16013e-05
CNAG_12702	304.777	-0.514357	0.188574	-2.72761	0.00637954	0.0168173
CNAG_04580	24694.1	-0.51426	0.150184	-3.42421	0.000616587	0.002304
CNAG_02071	30014.7	-0.513477	0.177308	-2.89596	0.00378004	0.0107108
CNAG_07422	14.5707	-0.513424	0.46521	-1.10364	0.269749	0.381711
CNAG_00450	7965.84	-0.512692	0.0799623	-6.41167	1.43936e-10	3.57167e-09
CNAG_04036	1960.18	-0.512605	0.143062	-3.58309	0.000339548	0.0013701
CNAG_00836	1927.36	-0.512585	0.202439	-2.53204	0.01134	0.0274412
CNAG_00550	2301.29	-0.512398	0.148889	-3.44148	0.000578551	0.00217594
CNAG_04187	5671.36	-0.512332	0.092242	-5.55422	2.78858e-08	3.758e-07
CNAG_10052	4.46162	-0.511813	0.472038	-1.08426	0.278249	0.391799
CNAG_00604	3921.23	-0.511707	0.123566	-4.14115	3.45567e-05	0.00019043
CNAG_07439	15604	-0.511469	0.140425	-3.64229	0.000270228	0.00112602
CNAG_06112	29700.1	-0.510387	0.149389	-3.41651	0.000634305	0.00235851
CNAG_13003	30.6936	-0.510327	0.347392	-1.46902	0.141827	0.226373
CNAG_01236	14033	-0.510199	0.143751	-3.54919	0.000386416	0.00153235
CNAG_01740	9468.35	-0.510169	0.107088	-4.764	1.89795e-06	1.5746e-05
CNAG_12586	760.906	-0.51011	0.155369	-3.28321	0.00102633	0.00355314
CNAG_01729	10489.6	-0.510087	0.191692	-2.66097	0.00779165	0.0199374
CNAG_00809	36526.1	-0.509976	0.164935	-3.09198	0.00198825	0.00622069
CNAG_03181	403.205	-0.508916	0.211353	-2.40789	0.0160448	0.0368772
CNAG_05013	20714.6	-0.508542	0.0548573	-9.27027	1.85676e-20	3.75338e-18
CNAG_06654	1147.44	-0.508052	0.158261	-3.21021	0.00132637	0.00441662
CNAG_05836	2984.66	-0.508008	0.189458	-2.68137	0.00733207	0.0189368
CNAG_03064	6330.86	-0.507539	0.150112	-3.38107	0.000722035	0.00262351
CNAG_00609	7505.56	-0.507086	0.130756	-3.8781	0.000105274	0.000497155
CNAG_06626	13308.3	-0.506928	0.156421	-3.24079	0.00119197	0.00402243
CNAG_05140	11422.8	-0.506807	0.181166	-2.79747	0.00515046	0.0140141
CNAG_06228	8571.46	-0.506616	0.147627	-3.43174	0.000599728	0.00224505
CNAG_00358	4034.98	-0.506489	0.123388	-4.10484	4.04596e-05	0.000217888
CNAG_04679	3102.76	-0.506036	0.10833	-4.67125	2.9937e-06	2.29526e-05
CNAG_04037	5938.33	-0.505946	0.144346	-3.5051	0.000456444	0.00176941
CNAG_06348	15881.9	-0.505641	0.191321	-2.6429	0.00821995	0.0208212
CNAG_03739	54371	-0.505146	0.0786008	-6.42673	1.30377e-10	3.27443e-09
CNAG_00314	2265.03	-0.505127	0.144097	-3.50546	0.000455822	0.00176783
CNAG_01429	663.538	-0.504887	0.102835	-4.90967	9.12279e-07	8.19173e-06
CNAG_03105	470.103	-0.504412	0.144786	-3.48385	0.000494252	0.0018991
CNAG_06377	76552.5	-0.504291	0.0744484	-6.7737	1.25529e-11	3.94086e-10
CNAG_12130	457.976	-0.503995	0.176239	-2.85973	0.00424004	0.0118469
CNAG_01679	13670.4	-0.503218	0.132783	-3.78977	0.000150788	0.00067994
CNAG_04683	2678.43	-0.502872	0.106067	-4.74109	2.12572e-06	1.73747e-05
CNAG_04031	1999.62	-0.501361	0.127178	-3.94221	8.07358e-05	0.000397699
CNAG_06919	35524.9	-0.501346	0.126479	-3.96387	7.37458e-05	0.000368196
CNAG_12938	502.897	-0.501302	0.268058	-1.87012	0.0614669	0.113688
CNAG_06272	3776.98	-0.501261	0.114851	-4.36444	1.27448e-05	8.03263e-05
CNAG_12214	155.793	-0.501179	0.214467	-2.33686	0.0194464	0.0432792
CNAG_06385	1735.79	-0.500653	0.167007	-2.99779	0.00271949	0.00812743
CNAG_02323	7312.01	-0.500593	0.166993	-2.9977	0.00272026	0.00812743
CNAG_12894	37.1071	-0.50036	0.294222	-1.70062	0.0890143	0.154373
CNAG_08003	2998.09	-0.500343	0.154407	-3.24042	0.00119354	0.00402606
CNAG_00506	2021.37	-0.500269	0.209493	-2.388	0.0169404	0.0385614
CNAG_05064	267.874	-0.500214	0.201202	-2.48612	0.0129143	0.0307039
CNAG_04373	30553.8	-0.500061	0.0995893	-5.02123	5.13412e-07	4.90791e-06
CNAG_12257	501.935	-0.499616	0.170662	-2.92751	0.0034169	0.00982626
CNAG_02075	2011.4	-0.499447	0.127253	-3.92484	8.67886e-05	0.000422014
CNAG_04082	13322	-0.498806	0.0937148	-5.3226	1.02296e-07	1.17724e-06
CNAG_03915	3634.96	-0.498725	0.16879	-2.9547	0.00312971	0.00912383
CNAG_07934	10.9145	-0.498566	0.390104	-1.27803	0.201237	0.301929
CNAG_04567	1868.67	-0.498558	0.114926	-4.33806	1.43743e-05	8.95074e-05
CNAG_03961	3743.95	-0.498482	0.112435	-4.43352	9.27053e-06	6.06426e-05
CNAG_04791	4354.37	-0.498375	0.129376	-3.85215	0.000117083	0.000545082
CNAG_03602	49858.9	-0.498177	0.150223	-3.31626	0.000912314	0.00320873
CNAG_12136	198.799	-0.497874	0.326564	-1.52459	0.127362	0.207098
CNAG_01145	2202.73	-0.49787	0.185856	-2.6788	0.00738862	0.0190672
CNAG_12463	48.1744	-0.497792	0.318588	-1.56249	0.118172	0.194946
CNAG_04347	8402.59	-0.497699	0.0966801	-5.1479	2.63422e-07	2.72905e-06
CNAG_12051	462.839	-0.49758	0.220672	-2.25484	0.0241434	0.0517992
CNAG_02384	884.802	-0.49755	0.207147	-2.40192	0.0163092	0.0373607
CNAG_03119	1584.8	-0.497471	0.115336	-4.31325	1.60875e-05	9.89122e-05
CNAG_01710	974.743	-0.497048	0.176474	-2.81656	0.00485415	0.013304
CNAG_05087	323.474	-0.497012	0.177319	-2.80293	0.00506405	0.0137971
CNAG_12905	106.323	-0.496774	0.258541	-1.92145	0.0546749	0.103152
CNAG_05223	1224.33	-0.4963	0.134927	-3.67828	0.000234812	0.000997498
CNAG_06745	19740.8	-0.496189	0.117942	-4.20705	2.58721e-05	0.000149531
CNAG_10048	3.82818	-0.495938	0.48348	-1.02577	0.305001	0.420733
CNAG_13121	19808.6	-0.49554	0.469654	-1.05512	0.291372	0.405796
CNAG_04323	15346.6	-0.495487	0.116773	-4.24315	2.20401e-05	0.000130013
CNAG_04479	1389.88	-0.495239	0.203274	-2.43632	0.0148377	0.0344951
CNAG_04571	6130.63	-0.49462	0.182749	-2.70656	0.00679846	0.0177299
CNAG_03411	2195.94	-0.494448	0.120653	-4.0981	4.16556e-05	0.000223747
CNAG_02659	145.283	-0.493987	0.373348	-1.32313	0.185792	0.283268
CNAG_03567	7598.72	-0.493365	0.127518	-3.869	0.000109284	0.000514042
CNAG_01113	2079.6	-0.4933	0.161463	-3.05518	0.00224923	0.00692399
CNAG_07746	30077.2	-0.493092	0.194283	-2.538	0.0111486	0.0270254
CNAG_06893	2976.41	-0.49294	0.10508	-4.6911	2.71742e-06	2.12272e-05
CNAG_05076	3244.94	-0.492928	0.12324	-3.99974	6.34119e-05	0.00032342
CNAG_04496	6236.87	-0.49277	0.278078	-1.77206	0.0763846	0.136351
CNAG_03863	9527.31	-0.49272	0.105112	-4.68758	2.76451e-06	2.15543e-05
CNAG_12470	120.064	-0.492478	0.27334	-1.8017	0.0715918	0.128996
CNAG_13106	172.221	-0.492242	0.259496	-1.89691	0.0578394	0.108064
CNAG_03303	23332	-0.492044	0.0887422	-5.54465	2.9455e-08	3.91851e-07
CNAG_02828	1508.55	-0.492011	0.210062	-2.34222	0.0191696	0.0427666
CNAG_00345	5969.56	-0.491625	0.104746	-4.69351	2.68562e-06	2.10781e-05
CNAG_07536	5257.47	-0.491617	0.156222	-3.14691	0.00165005	0.00530679
CNAG_06684	4405.47	-0.491521	0.163144	-3.01279	0.00258855	0.00779503
CNAG_05697	7222.99	-0.491373	0.128379	-3.82752	0.000129443	0.000595023
CNAG_01546	1573.73	-0.490773	0.135729	-3.61584	0.000299376	0.00123077
CNAG_04681	5661.94	-0.49074	0.312087	-1.57244	0.115848	0.191838
CNAG_04062	14371.6	-0.490408	0.170294	-2.87977	0.00397961	0.0111939
CNAG_03457	23196.2	-0.490212	0.131871	-3.71735	0.000201326	0.000877743
CNAG_00429	2951.26	-0.490133	0.267082	-1.83514	0.0664852	0.121212
CNAG_06930	2333.18	-0.489871	0.160018	-3.06136	0.00220337	0.00679878
CNAG_07042	8.64238	-0.489705	0.478959	-1.02244	0.306575	0.422215
CNAG_01715	17232.7	-0.489685	0.182803	-2.67876	0.00738947	0.0190672
CNAG_07030	2199.92	-0.489684	0.163993	-2.986	0.00282657	0.00839964
CNAG_13193	16.2722	-0.489093	0.463658	-1.05486	0.29149	0.405893
CNAG_00590	5617.28	-0.487865	0.171625	-2.84263	0.00447431	0.0124107
CNAG_04395	7119.5	-0.487776	0.143571	-3.39746	0.000680152	0.00249871
CNAG_01657	14602.6	-0.487756	0.0891727	-5.46979	4.50564e-08	5.64944e-07
CNAG_02268	2353.14	-0.487603	0.139369	-3.49863	0.000467647	0.00180946
CNAG_02853	22826.6	-0.487531	0.132015	-3.693	0.000221622	0.000948761
CNAG_02134	7670.47	-0.487368	0.134975	-3.61081	0.000305242	0.00125178
CNAG_01306	3184.1	-0.487158	0.17527	-2.77948	0.00544463	0.0146708
CNAG_01629	2589.5	-0.486696	0.137078	-3.55051	0.000384479	0.0015254
CNAG_01843	7245.3	-0.48659	0.084766	-5.74039	9.44575e-09	1.46057e-07
CNAG_01104	5450.55	-0.486442	0.135654	-3.58591	0.000335906	0.00135738
CNAG_06350	5470.43	-0.485743	0.122469	-3.96626	7.30089e-05	0.000365618
CNAG_05516	2891.85	-0.485217	0.182402	-2.66016	0.00781046	0.019967
CNAG_00730	18312.2	-0.485178	0.236241	-2.05374	0.0400008	0.0794838
CNAG_04213	6765.6	-0.484974	0.252148	-1.92337	0.0544338	0.10279
CNAG_06896	8379.58	-0.484798	0.183411	-2.64323	0.00821201	0.0208074
CNAG_02212	32270.4	-0.484652	0.115364	-4.20107	2.6566e-05	0.000152902
CNAG_07406	170.746	-0.484175	0.249716	-1.9389	0.0525133	0.0996223
CNAG_04908	2874.9	-0.483948	0.107458	-4.50359	6.68162e-06	4.61862e-05
CNAG_02197	5267.85	-0.483764	0.0779373	-6.20708	5.39768e-10	1.15299e-08
CNAG_03198	70768.7	-0.483741	0.0896354	-5.39676	6.78538e-08	8.15033e-07
CNAG_07455	35.2583	-0.483293	0.266487	-1.81357	0.0697434	0.126126
CNAG_01056	221.779	-0.483254	0.132622	-3.64386	0.000268582	0.00112085
CNAG_00891	32964.4	-0.482959	0.129282	-3.73572	0.000187182	0.000821698
CNAG_12650	12.0962	-0.482431	0.464785	-1.03797	0.299286	0.414311
CNAG_05537	3997.92	-0.482366	0.182667	-2.64068	0.00827407	0.0209263
CNAG_06127	14176.1	-0.482359	0.134529	-3.58554	0.00033638	0.00135863
CNAG_01305	8931.63	-0.482355	0.0925669	-5.21088	1.87949e-07	2.01255e-06
CNAG_02982	12625.8	-0.482319	0.172899	-2.78959	0.00527745	0.0142986
CNAG_01603	8936.71	-0.480744	0.0871109	-5.51876	3.41396e-08	4.44889e-07
CNAG_02101	3651.24	-0.480622	0.122077	-3.93704	8.24945e-05	0.000404565
CNAG_05555	67286.7	-0.480195	0.0749459	-6.40723	1.4819e-10	3.65535e-09
CNAG_12686	35.0825	-0.480188	0.329316	-1.45814	0.144803	0.229865
CNAG_02815	19836.8	-0.479842	0.317785	-1.50996	0.131054	0.212062
CNAG_06764	7075.67	-0.479766	0.0942518	-5.09026	3.57568e-07	3.57051e-06
CNAG_03098	9198.86	-0.479322	0.121077	-3.95882	7.53205e-05	0.000373821
CNAG_12817	83.0207	-0.479235	0.292935	-1.63598	0.101844	0.172967
CNAG_00019	5708.37	-0.479091	0.104122	-4.60123	4.19999e-06	3.08322e-05
CNAG_13005	6.93509	-0.47901	0.449666	-1.06526	0.286759	0.401057
CNAG_12011	277.558	-0.478926	0.186346	-2.57009	0.0101673	0.0249456
CNAG_05360	8713.26	-0.478755	0.173475	-2.7598	0.00578369	0.015453
CNAG_03258	4379.05	-0.478654	0.149346	-3.205	0.00135061	0.00448472
CNAG_02106	4376.69	-0.478491	0.09156	-5.22599	1.73226e-07	1.88317e-06
CNAG_06508	38129.2	-0.478245	0.169572	-2.82031	0.00479777	0.0131712
CNAG_04276	5462.66	-0.477984	0.0954613	-5.00709	5.52583e-07	5.25207e-06
CNAG_02838	3097.3	-0.477504	0.101948	-4.6838	2.81602e-06	2.18532e-05
CNAG_03595	7394.01	-0.47739	0.132837	-3.59382	0.00032587	0.00132393
CNAG_00232	43585.4	-0.47688	0.0803802	-5.9328	2.97817e-09	5.16383e-08
CNAG_12868	93.3011	-0.476841	0.259638	-1.83656	0.0662742	0.120907
CNAG_01727	53058.4	-0.476759	0.137709	-3.46207	0.000536042	0.00203888
CNAG_01154	1657.32	-0.476682	0.0985586	-4.83653	1.32123e-06	1.13948e-05
CNAG_00603	7003.21	-0.476031	0.170686	-2.78892	0.00528839	0.0143236
CNAG_03124	13413.4	-0.476001	0.169571	-2.80709	0.00499912	0.0136337
CNAG_12099	139.629	-0.475715	0.298263	-1.59495	0.110723	0.184978
CNAG_04810	743.328	-0.475416	0.134654	-3.53066	0.000414526	0.0016267
CNAG_02977	11842.1	-0.475315	0.147385	-3.22498	0.00125981	0.0042102
CNAG_03483	2479.13	-0.475229	0.128633	-3.69446	0.000220358	0.000944813
CNAG_00447	11365.9	-0.47478	0.0829213	-5.72567	1.03024e-08	1.56099e-07
CNAG_03109	6335.16	-0.474495	0.0731309	-6.48829	8.68141e-11	2.29877e-09
CNAG_06446	6812.86	-0.474462	0.103393	-4.5889	4.45598e-06	3.23673e-05
CNAG_04330	143.882	-0.47446	0.225011	-2.10861	0.0349783	0.0710191
CNAG_04909	3579.79	-0.473792	0.105922	-4.47301	7.7125e-06	5.20531e-05
CNAG_06007	4948.87	-0.473532	0.144264	-3.28239	0.00102932	0.00356051
CNAG_03312	1577.8	-0.473298	0.173095	-2.73433	0.00625067	0.0165249
CNAG_02948	20143.6	-0.473046	0.0653845	-7.23483	4.66115e-13	2.0882e-11
CNAG_02830	12776.8	-0.473029	0.189723	-2.49326	0.0126578	0.0301545
CNAG_07537	2450.21	-0.472751	0.142918	-3.30785	0.00094016	0.0032864
CNAG_12004	951.345	-0.472748	0.448389	-1.05433	0.291734	0.406163
CNAG_03819	14887.4	-0.472567	0.172815	-2.73452	0.00624713	0.0165208
CNAG_00164	5843.44	-0.471881	0.100571	-4.69204	2.70493e-06	2.11495e-05
CNAG_03559	1050.85	-0.471597	0.161575	-2.91875	0.00351439	0.0100612
CNAG_05711	869.662	-0.47123	0.132597	-3.55386	0.000379619	0.00150973
CNAG_03438	73256.9	-0.470533	0.154152	-3.0524	0.00227021	0.00696355
CNAG_02145	2931.44	-0.470454	0.0954993	-4.92626	8.38171e-07	7.61861e-06
CNAG_02706	46.0201	-0.470358	0.3674	-1.28023	0.200463	0.300985
CNAG_03283	35102.9	-0.469995	0.104639	-4.49158	7.06959e-06	4.84238e-05
CNAG_00007	7069.07	-0.469493	0.0944302	-4.97186	6.63149e-07	6.16855e-06
CNAG_00191	5220.68	-0.469433	0.175746	-2.67108	0.00756066	0.0194544
CNAG_12300	80.1646	-0.468896	0.234735	-1.99756	0.0457648	0.0886627
CNAG_12188	567.231	-0.468805	0.20378	-2.30054	0.0214175	0.0468483
CNAG_03878	5703.31	-0.46869	0.138398	-3.38654	0.000707791	0.00257864
CNAG_12554	548.803	-0.468659	0.145148	-3.22884	0.00124292	0.00416383
CNAG_02890	7162.55	-0.468645	0.116805	-4.0122	6.01555e-05	0.000308139
CNAG_02868	7352.96	-0.468245	0.0890279	-5.25953	1.4442e-07	1.60665e-06
CNAG_12753	3050.69	-0.467296	0.118621	-3.9394	8.16844e-05	0.000401304
CNAG_01168	30724.6	-0.466967	0.129898	-3.59488	0.000324542	0.00131982
CNAG_04776	8254.42	-0.466967	0.0605584	-7.71101	1.24825e-14	8.55003e-13
CNAG_01497	870.865	-0.46647	0.148613	-3.13882	0.00169628	0.0054344
CNAG_02598	1672.73	-0.466413	0.0893562	-5.2197	1.79213e-07	1.93149e-06
CNAG_03203	8186.34	-0.466064	0.0900585	-5.17512	2.2776e-07	2.39553e-06
CNAG_05027	1137.96	-0.465964	0.149117	-3.12482	0.00177913	0.00567132
CNAG_06918	879.726	-0.464555	0.14718	-3.15637	0.00159745	0.00516368
CNAG_00084	8471.95	-0.464497	0.121853	-3.81195	0.000137872	0.000629578
CNAG_05719	3191.17	-0.464308	0.111052	-4.18099	2.90247e-05	0.000164549
CNAG_12677	714.433	-0.464078	0.209193	-2.21842	0.0265263	0.0562073
CNAG_13120	2620.31	-0.464022	0.217861	-2.1299	0.0331798	0.0680847
CNAG_00446	19.6449	-0.463302	0.372104	-1.24509	0.2131	0.315908
CNAG_03045	2686.58	-0.462969	0.112396	-4.11907	3.80409e-05	0.000206607
CNAG_12052	33.058	-0.462898	0.345899	-1.33824	0.180817	0.276751
CNAG_07986	4497.42	-0.462793	0.136514	-3.39009	0.000698707	0.0025533
CNAG_01791	13673.1	-0.462086	0.147898	-3.12434	0.00178202	0.00567552
CNAG_06928	3436.53	-0.461407	0.19487	-2.36777	0.0178958	0.0403703
CNAG_04461	763.512	-0.461259	0.204589	-2.25456	0.024161	0.0518236
CNAG_03902	8612.56	-0.461024	0.124536	-3.70194	0.000213956	0.000921176
CNAG_00525	6502.72	-0.460764	0.0969771	-4.75127	2.02145e-06	1.66373e-05
CNAG_09010	15.9863	-0.460417	0.482627	-0.953983	0.340092	0.458456
CNAG_00935	24157.7	-0.460242	0.07524	-6.11698	9.53635e-10	1.88184e-08
CNAG_06113	94176.9	-0.459929	0.083012	-5.54051	3.01594e-08	3.99938e-07
CNAG_06031	2493.08	-0.459439	0.142055	-3.23424	0.00121969	0.00409926
CNAG_03095	26.206	-0.459396	0.452796	-1.01458	0.310308	0.426223
CNAG_02842	4618.73	-0.458856	0.0988897	-4.64007	3.48284e-06	2.62178e-05
CNAG_05101	12781.6	-0.45869	0.154674	-2.96554	0.00302153	0.00886145
CNAG_03421	653.66	-0.458533	0.126913	-3.61297	0.000302712	0.00124202
CNAG_13019	933.869	-0.457612	0.134478	-3.40288	0.000666791	0.00245944
CNAG_01842	8992.86	-0.457371	0.206215	-2.21793	0.0265595	0.0562548
CNAG_12850	5.79721	-0.456728	0.485741	-0.940271	0.347079	0.465467
CNAG_01780	9409.98	-0.456661	0.1083	-4.21663	2.4798e-05	0.000144127
CNAG_01428	54890.2	-0.456586	0.0601458	-7.59132	3.1667e-14	1.9883e-12
CNAG_00344	3557.84	-0.45646	0.158712	-2.87603	0.00402705	0.011314
CNAG_00535	5216.25	-0.455939	0.102455	-4.45014	8.58148e-06	5.67661e-05
CNAG_12759	5.56512	-0.45516	0.448326	-1.01524	0.30999	0.425857
CNAG_07511	10408.7	-0.454891	0.109081	-4.17022	3.04307e-05	0.000171805
CNAG_04416	432.614	-0.454638	0.12787	-3.55546	0.000377317	0.00150346
CNAG_07839	51656.6	-0.454475	0.093388	-4.86652	1.13581e-06	9.98261e-06
CNAG_00125	1130.72	-0.454011	0.165493	-2.74338	0.00608097	0.0161432
CNAG_01608	6407.88	-0.453692	0.143655	-3.15821	0.00158739	0.00513717
CNAG_02863	1.23304	-0.453638	0.459173	-0.987945	0.32318	0.440328
CNAG_02782	5275.39	-0.453622	0.0926348	-4.89689	9.73655e-07	8.67705e-06
CNAG_07957	6470.64	-0.45356	0.124608	-3.63988	0.000272763	0.00113488
CNAG_05583	2642.48	-0.453275	0.177179	-2.55829	0.0105188	0.0256941
CNAG_06656	5081.29	-0.453128	0.133621	-3.39115	0.000695991	0.00254787
CNAG_03898	3187.03	-0.453086	0.137812	-3.28772	0.00101003	0.00350404
CNAG_02657	14197.9	-0.452642	0.096831	-4.67456	2.94591e-06	2.26701e-05
CNAG_05816	3829.29	-0.452637	0.119029	-3.80275	0.000143098	0.00065129
CNAG_00541	984.675	-0.451976	0.0953945	-4.73796	2.15877e-06	1.75583e-05
CNAG_12861	13.9683	-0.451439	0.476403	-0.947598	0.343334	0.461302
CNAG_02388	1026.87	-0.451306	0.0983323	-4.58961	4.44082e-06	3.22855e-05
CNAG_03129	3279.28	-0.450566	0.235253	-1.91524	0.0554617	0.104446
CNAG_05716	2658.91	-0.450427	0.100927	-4.46289	8.08627e-06	5.40912e-05
CNAG_03106	4801.13	-0.450298	0.110313	-4.082	4.465e-05	0.000237827
CNAG_05262	7291.97	-0.450093	0.119856	-3.75528	0.000173145	0.000767394
CNAG_01760	3805.44	-0.45009	0.0893669	-5.03643	4.74305e-07	4.59771e-06
CNAG_00370	37083.1	-0.449768	0.0898484	-5.00586	5.56133e-07	5.27976e-06
CNAG_00239	3740.01	-0.449616	0.140137	-3.2084	0.00133475	0.00444274
CNAG_06865	3509.53	-0.449078	0.150654	-2.98085	0.00287449	0.00850544
CNAG_04452	2257.02	-0.448557	0.1059	-4.23568	2.27859e-05	0.000133746
CNAG_05584	2696.38	-0.448082	0.108829	-4.11732	3.83311e-05	0.000207775
CNAG_07535	2787.66	-0.447697	0.108502	-4.12614	3.68895e-05	0.00020141
CNAG_02002	5865.47	-0.447403	0.101168	-4.42237	9.76242e-06	6.34596e-05
CNAG_12132	106.43	-0.447058	0.297744	-1.50149	0.13323	0.21512
CNAG_02359	50403.4	-0.447047	0.0871292	-5.13085	2.88429e-07	2.94397e-06
CNAG_07664	5137.79	-0.446215	0.104786	-4.25834	2.05948e-05	0.00012227
CNAG_05552	15277	-0.446118	0.164047	-2.71945	0.00653907	0.0171777
CNAG_12932	1199.82	-0.445782	0.143005	-3.11725	0.00182545	0.00579222
CNAG_03703	2.05539	-0.4455	0.482005	-0.924264	0.355349	0.473798
CNAG_07598	13260.7	-0.444948	0.128641	-3.45882	0.000542543	0.00205888
CNAG_06160	7653.91	-0.444771	0.238258	-1.86676	0.0619347	0.114352
CNAG_01745	33015	-0.44384	0.191131	-2.32218	0.0202233	0.0446605
CNAG_06233	15.4309	-0.443587	0.462912	-0.958253	0.337935	0.456306
CNAG_07553	3688.81	-0.443478	0.132363	-3.35046	0.000806762	0.00289582
CNAG_12177	17.7044	-0.44342	0.429148	-1.03326	0.301483	0.416874
CNAG_04663	3491.03	-0.443285	0.147696	-3.00132	0.00268808	0.00805453
CNAG_02024	6805.18	-0.442923	0.226794	-1.95298	0.0508223	0.0968089
CNAG_13070	47.7237	-0.442446	0.288479	-1.53372	0.125099	0.204178
CNAG_03013	5070.3	-0.442399	0.235541	-1.87823	0.0603501	0.111923
CNAG_05032	2841.28	-0.442298	0.133074	-3.3237	0.000888325	0.00314097
CNAG_02824	3436.36	-0.442265	0.149127	-2.9657	0.00301994	0.00885992
CNAG_04029	1913.14	-0.441421	0.157978	-2.7942	0.0052029	0.014129
CNAG_03986	6058.06	-0.441401	0.105183	-4.19649	2.71083e-05	0.000155591
CNAG_06976	5.87484	-0.440958	0.485652	-0.907971	0.363894	0.482012
CNAG_06005	10219.4	-0.440173	0.162063	-2.71606	0.00660644	0.0173218
CNAG_04983	3205.48	-0.440052	0.119615	-3.67892	0.000234227	0.000995527
CNAG_06094	767.228	-0.439624	0.106553	-4.12587	3.69337e-05	0.000201518
CNAG_12896	121.08	-0.439553	0.309471	-1.42034	0.15551	0.243642
CNAG_03717	1152.88	-0.439469	0.108077	-4.06625	4.77752e-05	0.000251884
CNAG_01688	10461	-0.438901	0.122106	-3.59442	0.000325115	0.00132151
CNAG_07778	15184.4	-0.438705	0.114896	-3.81827	0.000134391	0.000614696
CNAG_13031	908.38	-0.438573	0.419893	-1.04449	0.296259	0.410739
CNAG_02783	3446.48	-0.438543	0.102448	-4.28062	1.86371e-05	0.000112584
CNAG_01432	8292.28	-0.438439	0.145501	-3.0133	0.00258422	0.00778786
CNAG_03081	5984.71	-0.438317	0.0937813	-4.67382	2.95655e-06	2.27253e-05
CNAG_03642	1058.82	-0.438134	0.134185	-3.26516	0.00109401	0.0037375
CNAG_02520	6992.04	-0.437155	0.125411	-3.48577	0.000490724	0.00188824
CNAG_04997	3973.31	-0.437127	0.106222	-4.11521	3.86835e-05	0.000209411
CNAG_01894	7378.29	-0.436884	0.0622379	-7.01959	2.22523e-12	8.19676e-11
CNAG_05150	5996.31	-0.436672	0.128954	-3.38626	0.000708518	0.00258005
CNAG_04372	4868.4	-0.436553	0.113645	-3.84136	0.000122352	0.000565563
CNAG_07462	296.851	-0.436301	0.130201	-3.35098	0.000805275	0.00289352
CNAG_07410	13182.8	-0.435962	0.106799	-4.08207	4.4636e-05	0.000237827
CNAG_10063	5.52745	-0.435908	0.484531	-0.899649	0.368307	0.486536
CNAG_10086	1.6587	-0.435905	0.461389	-0.944767	0.344778	0.462981
CNAG_04084	13.3737	-0.435649	0.451041	-0.965874	0.334107	0.452316
CNAG_00819	13382.4	-0.435517	0.109434	-3.97974	6.89916e-05	0.00034866
CNAG_02507	16295.9	-0.435352	0.0830252	-5.24361	1.57465e-07	1.73778e-06
CNAG_03659	6136.68	-0.435295	0.161854	-2.68944	0.00715727	0.0185721
CNAG_00422	4633.5	-0.435261	0.198385	-2.19402	0.028234	0.0593033
CNAG_04868	3758.89	-0.435159	0.140071	-3.1067	0.0018919	0.00598475
CNAG_06763	3369.89	-0.435099	0.122437	-3.55365	0.000379921	0.00151021
CNAG_01368	119.242	-0.434842	0.201513	-2.15789	0.0309362	0.0640678
CNAG_04948	7579.2	-0.434727	0.0886085	-4.90615	9.28802e-07	8.32207e-06
CNAG_02894	1946.03	-0.434591	0.131949	-3.29363	0.000989031	0.00343982
CNAG_02497	1828.56	-0.434089	0.120531	-3.60147	0.000316428	0.00129063
CNAG_10091	3.67801	-0.43396	0.472513	-0.918409	0.358405	0.476876
CNAG_12834	3497.44	-0.433941	0.130806	-3.31745	0.000908435	0.0032015
CNAG_06796	3114.41	-0.433529	0.11137	-3.89271	9.91322e-05	0.000473004
CNAG_04035	4142.76	-0.433518	0.152589	-2.84108	0.00449614	0.0124671
CNAG_00795	3.70987	-0.433255	0.400492	-1.08181	0.279337	0.392798
CNAG_06495	12584.9	-0.433034	0.130733	-3.31234	0.000925177	0.00324635
CNAG_06864	6194.14	-0.432647	0.13706	-3.15662	0.00159607	0.00516122
CNAG_04239	1650.05	-0.432581	0.190655	-2.26892	0.0232731	0.0502049
CNAG_02712	3669.22	-0.432549	0.136055	-3.17922	0.0014767	0.00482227
CNAG_00310	2137.09	-0.432326	0.086446	-5.0011	5.70029e-07	5.39315e-06
CNAG_12843	374.524	-0.432023	0.125426	-3.44443	0.00057226	0.00215627
CNAG_00733	6935.23	-0.431959	0.149228	-2.89461	0.00379626	0.010742
CNAG_12113	416.662	-0.431708	0.152699	-2.82718	0.00469607	0.0129387
CNAG_00320	2179.32	-0.431694	0.182343	-2.36748	0.0179098	0.0403908
CNAG_01641	18132.8	-0.431664	0.17366	-2.48569	0.0129301	0.0307327
CNAG_05443	473.053	-0.431407	0.118526	-3.63975	0.000272901	0.00113488
CNAG_12704	1099.91	-0.431332	0.133903	-3.22122	0.00127645	0.00425724
CNAG_04053	8616.67	-0.430739	0.125478	-3.43277	0.000597443	0.00224035
CNAG_02766	2653.65	-0.429978	0.139487	-3.08257	0.00205224	0.00640397
CNAG_03845	2859.92	-0.429511	0.0834933	-5.14426	2.6857e-07	2.76855e-06
CNAG_04471	1516.12	-0.4295	0.175406	-2.44861	0.014341	0.0335048
CNAG_07478	990.453	-0.429365	0.157009	-2.73465	0.00624459	0.0165194
CNAG_00142	11907.5	-0.429126	0.158678	-2.70439	0.00684309	0.0178239
CNAG_04287	5748.24	-0.428656	0.0835257	-5.13203	2.86637e-07	2.92928e-06
CNAG_12565	61.4668	-0.428652	0.333808	-1.28413	0.199098	0.299586
CNAG_05580	127.228	-0.428065	0.200912	-2.13061	0.033121	0.0680147
CNAG_01898	8746.18	-0.428064	0.153042	-2.79704	0.00515726	0.014028
CNAG_07980	1156.7	-0.427972	0.132586	-3.22788	0.00124712	0.00417453
CNAG_02136	2449.76	-0.427901	0.119123	-3.59209	0.000328042	0.00133079
CNAG_04179	16272.8	-0.42762	0.0960897	-4.45021	8.57847e-06	5.67661e-05
CNAG_01170	47117.9	-0.427549	0.0982152	-4.35319	1.34172e-05	8.37993e-05
CNAG_03721	4664.17	-0.42719	0.095497	-4.47334	7.70082e-06	5.20166e-05
CNAG_05037	570.678	-0.427176	0.232184	-1.83982	0.0657951	0.12023
CNAG_01299	439.729	-0.426878	0.156685	-2.72443	0.00644121	0.0169529
CNAG_03588	15194.6	-0.426798	0.0941976	-4.53088	5.87371e-06	4.14309e-05
CNAG_01844	2414.57	-0.426564	0.164003	-2.60095	0.00929657	0.023113
CNAG_07425	270.797	-0.426423	0.210611	-2.02469	0.042899	0.0839345
CNAG_07969	381.51	-0.426407	0.202359	-2.10718	0.0351019	0.0712526
CNAG_02441	167.014	-0.426401	0.261525	-1.63044	0.103008	0.174623
CNAG_00238	29124.3	-0.426086	0.112122	-3.80019	0.000144587	0.000656865
CNAG_04985	19400	-0.425809	0.0736817	-5.77904	7.51284e-09	1.18829e-07
CNAG_02660	152.581	-0.425393	0.343964	-1.23674	0.216185	0.319213
CNAG_04705	3344.75	-0.425379	0.170521	-2.49459	0.0126103	0.0300674
CNAG_02418	9533.95	-0.425206	0.0932747	-4.55864	5.14852e-06	3.68171e-05
CNAG_06125	553319	-0.425071	0.0589636	-7.20904	5.63486e-13	2.47099e-11
CNAG_07465	2113.2	-0.425056	0.143802	-2.95585	0.00311805	0.00909943
CNAG_12993	69.5464	-0.425049	0.316408	-1.34336	0.179157	0.274616
CNAG_07982	3726.56	-0.424895	0.217609	-1.95256	0.0508713	0.0968799
CNAG_04363	882.652	-0.424853	0.127503	-3.3321	0.000861925	0.00306594
CNAG_06728	8901.03	-0.424826	0.167501	-2.53627	0.0112041	0.027144
CNAG_03926	8421.87	-0.424811	0.109251	-3.88838	0.000100915	0.000480129
CNAG_05125	5688.05	-0.424716	0.150163	-2.82837	0.00467856	0.0129038
CNAG_01132	5320.09	-0.424548	0.140158	-3.02907	0.00245304	0.00744173
CNAG_05476	1335.15	-0.424469	0.158028	-2.68604	0.00723036	0.0187266
CNAG_01344	3449.68	-0.424173	0.127407	-3.32927	0.00087074	0.00308802
CNAG_01676	6566.68	-0.424046	0.146838	-2.88785	0.00387888	0.0109534
CNAG_02854	3677.05	-0.424007	0.112097	-3.78251	0.000155255	0.000698562
CNAG_01731	4499.08	-0.423988	0.152367	-2.78267	0.00539129	0.0145632
CNAG_13066	69.6901	-0.423761	0.338447	-1.25207	0.210543	0.313057
CNAG_02545	33289.6	-0.423581	0.0574804	-7.36913	1.71744e-13	8.52344e-12
CNAG_07796	1869.74	-0.423504	0.246584	-1.71748	0.0858911	0.150278
CNAG_04448	67997.6	-0.423441	0.0713299	-5.93637	2.91404e-09	5.07385e-08
CNAG_06643	1724.93	-0.422885	0.190528	-2.21954	0.0264502	0.0560807
CNAG_01021	6772.17	-0.422655	0.100947	-4.1869	2.82792e-05	0.000161105
CNAG_06273	11206.1	-0.422475	0.108464	-3.89507	9.8169e-05	0.000468948
CNAG_12774	30.9301	-0.422357	0.343996	-1.2278	0.219523	0.323278
CNAG_04302	1044.3	-0.422009	0.279743	-1.50856	0.131411	0.212597
CNAG_04360	2957.34	-0.421936	0.153973	-2.74033	0.00613777	0.0162731
CNAG_04709	8395.74	-0.421914	0.134764	-3.13077	0.00174351	0.0055699
CNAG_02354	8000.65	-0.421837	0.107114	-3.93822	8.20889e-05	0.000403053
CNAG_00512	6345.38	-0.421707	0.0753369	-5.59761	2.17325e-08	3.03741e-07
CNAG_06206	14394.4	-0.4217	0.156909	-2.68755	0.00719784	0.0186541
CNAG_05377	300.035	-0.420983	0.234531	-1.79499	0.0726545	0.130565
CNAG_06719	1542.15	-0.420943	0.198762	-2.11783	0.0341898	0.0697085
CNAG_12190	45.6955	-0.420934	0.317329	-1.32649	0.184677	0.281828
CNAG_00793	5068.58	-0.420546	0.131149	-3.20663	0.00134299	0.00446478
CNAG_12057	1403.12	-0.420442	0.144746	-2.90468	0.00367626	0.0104676
CNAG_01696	8591.76	-0.420362	0.124602	-3.37363	0.000741844	0.00268604
CNAG_03874	7694.67	-0.420161	0.105016	-4.00093	6.30935e-05	0.000321994
CNAG_06166	5727.27	-0.419968	0.208228	-2.01687	0.0437095	0.0852788
CNAG_12497	665.69	-0.4198	0.123166	-3.40841	0.000653429	0.00241553
CNAG_03890	3884.89	-0.419569	0.0852748	-4.9202	8.64567e-07	7.82263e-06
CNAG_13206	611.889	-0.419121	0.175056	-2.3942	0.0166565	0.0380301
CNAG_02084	6692.38	-0.419052	0.116318	-3.60264	0.000315008	0.0012861
CNAG_01359	6527.76	-0.418544	0.0769726	-5.43758	5.40092e-08	6.70102e-07
CNAG_01098	10465.7	-0.417462	0.139654	-2.98925	0.0027966	0.00833149
CNAG_00184	5555.11	-0.41746	0.0940477	-4.43881	9.04592e-06	5.9395e-05
CNAG_06798	10735.2	-0.41722	0.12647	-3.29896	0.000970444	0.00338227
CNAG_04016	194.125	-0.417161	0.217941	-1.91411	0.0556065	0.104624
CNAG_07817	5457.03	-0.416705	0.234333	-1.77826	0.0753615	0.134757
CNAG_06363	6709.49	-0.416488	0.166169	-2.50641	0.0121964	0.0291915
CNAG_02054	3475.32	-0.41645	0.11662	-3.571	0.000355617	0.00142798
CNAG_03921	9861.54	-0.41644	0.177587	-2.34499	0.0190276	0.0424813
CNAG_06563	9762.86	-0.415078	0.0689319	-6.02158	1.72728e-09	3.20979e-08
CNAG_03693	2130.58	-0.414632	0.0813512	-5.09682	3.45411e-07	3.46163e-06
CNAG_07609	7840	-0.4142	0.147915	-2.80025	0.00510628	0.013903
CNAG_04116	62.4273	-0.413908	0.327291	-1.26465	0.205997	0.307291
CNAG_00708	3329.27	-0.413905	0.109897	-3.7663	0.000165683	0.000738988
CNAG_03192	1642.84	-0.413837	0.105737	-3.91383	9.08423e-05	0.000437988
CNAG_03100	5482.87	-0.413791	0.0743755	-5.56355	2.64347e-08	3.59755e-07
CNAG_02858	33704	-0.413176	0.0574536	-7.19147	6.40976e-13	2.75254e-11
CNAG_05291	8046.11	-0.412776	0.181892	-2.26934	0.0232476	0.0501629
CNAG_02294	6941.5	-0.412701	0.112842	-3.65734	0.00025485	0.00107164
CNAG_01139	424.232	-0.412113	0.148271	-2.77946	0.00544491	0.0146708
CNAG_00928	3393.92	-0.411986	0.241647	-1.70491	0.0882116	0.153463
CNAG_03920	5774.2	-0.411773	0.11391	-3.6149	0.000300465	0.00123402
CNAG_00529	5070.65	-0.411674	0.139068	-2.96023	0.00307414	0.00899345
CNAG_01807	3289.72	-0.411493	0.24179	-1.70186	0.0887816	0.154099
CNAG_07648	3.26431	-0.411471	0.451496	-0.91135	NA	NA
CNAG_05627	6431.54	-0.411325	0.157854	-2.60574	0.00916763	0.0228104
CNAG_06278	12486.5	-0.411288	0.139177	-2.95513	0.00312537	0.00911437
CNAG_12942	797.369	-0.411167	0.118316	-3.47515	0.000510567	0.00195094
CNAG_07374	3409.61	-0.411093	0.161901	-2.53917	0.0111116	0.0269557
CNAG_04515	8227.43	-0.411037	0.165841	-2.4785	0.0131938	0.031225
CNAG_05366	11623	-0.410974	0.101213	-4.0605	4.89672e-05	0.000257513
CNAG_03669	4660.46	-0.41056	0.136553	-3.00659	0.00264195	0.00793062
CNAG_06734	1510.9	-0.410459	0.108006	-3.80034	0.000144498	0.000656865
CNAG_04843	6026.09	-0.4102	0.161002	-2.5478	0.0108406	0.026348
CNAG_02672	16112.2	-0.409692	0.136535	-3.00064	0.00269409	0.00806792
CNAG_12262	46.9651	-0.408739	0.321689	-1.27061	0.203869	0.304829
CNAG_06840	154596	-0.4087	0.0740968	-5.51576	3.47285e-08	4.51144e-07
CNAG_05623	7284.15	-0.408602	0.0875091	-4.66926	3.02292e-06	2.30525e-05
CNAG_12997	20.2529	-0.408317	0.3557	-1.14793	0.250999	0.360409
CNAG_01385	6523.81	-0.408115	0.069896	-5.83889	5.25505e-09	8.62453e-08
CNAG_06568	13768.8	-0.4077	0.153314	-2.65924	0.00783166	0.0200013
CNAG_06661	4653.09	-0.40755	0.203531	-2.0024	0.0452415	0.0877924
CNAG_06281	10.0639	-0.40746	0.441709	-0.922463	0.356287	0.474668
CNAG_02481	4814.91	-0.407329	0.135328	-3.00995	0.00261289	0.00786048
CNAG_04872	3957.78	-0.407002	0.0952211	-4.27428	1.91753e-05	0.000115414
CNAG_03944	14999.3	-0.406635	0.0758946	-5.35789	8.42008e-08	9.88465e-07
CNAG_00722	2607.13	-0.406473	0.11055	-3.67684	0.000236145	0.00100162
CNAG_00312	1268.25	-0.406472	0.115728	-3.5123	0.000444252	0.00173106
CNAG_00781	1332.67	-0.406381	0.102509	-3.96437	7.35912e-05	0.000368056
CNAG_03022	2338.91	-0.405852	0.151391	-2.68081	0.00734442	0.0189628
CNAG_12867	352.829	-0.405466	0.193597	-2.09438	0.0362261	0.0730872
CNAG_06677	2.30041	-0.405198	0.403275	-1.00477	0.315008	0.43125
CNAG_07448	3307.43	-0.404976	0.285541	-1.41827	0.156111	0.244337
CNAG_01308	5554.07	-0.404144	0.10088	-4.0062	6.17025e-05	0.000315673
CNAG_05893	22411.4	-0.403822	0.0899062	-4.49159	7.06942e-06	4.84238e-05
CNAG_05512	3519.13	-0.403777	0.127599	-3.16441	0.00155397	0.00504476
CNAG_00899	6922.57	-0.403161	0.174522	-2.31009	0.020883	0.0459093
CNAG_06853	4675.71	-0.402895	0.171779	-2.34542	0.0190057	0.0424466
CNAG_01586	28685.6	-0.402853	0.0854431	-4.71487	2.41868e-06	1.93121e-05
CNAG_07444	983.115	-0.402468	0.115845	-3.47419	0.000512394	0.00195651
CNAG_03458	2615.42	-0.402449	0.112608	-3.57389	0.000351718	0.00141438
CNAG_05166	11381.8	-0.402441	0.109853	-3.66345	0.000248842	0.0010485
CNAG_12845	56.9961	-0.402363	0.251236	-1.60154	0.109258	0.183047
CNAG_02882	11799.2	-0.402346	0.146115	-2.75362	0.00589397	0.0157122
CNAG_05553	1686.63	-0.402234	0.0885293	-4.54351	5.53252e-06	3.92246e-05
CNAG_02062	3220.81	-0.401738	0.184819	-2.17369	0.0297287	0.0619075
CNAG_04157	1473.55	-0.40161	0.175548	-2.28775	0.0221519	0.048213
CNAG_07968	1668.33	-0.401504	0.0968767	-4.14448	3.40584e-05	0.000188676
CNAG_06375	936.33	-0.40141	0.156583	-2.56356	0.0103603	0.0253443
CNAG_05894	14885	-0.401278	0.23023	-1.74294	0.0813436	0.14387
CNAG_04374	1578.6	-0.401271	0.0980643	-4.09191	4.2783e-05	0.000228765
CNAG_12356	188.43	-0.400906	0.258526	-1.55074	0.120964	0.198485
CNAG_13163	151.52	-0.400877	0.221392	-1.81071	0.0701855	0.126814
CNAG_02454	10058.2	-0.400454	0.152627	-2.62374	0.00869694	0.0218557
CNAG_03822	3379.67	-0.399759	0.115852	-3.4506	0.000559333	0.00211389
CNAG_01645	641.225	-0.399623	0.125078	-3.19499	0.00139834	0.00460813
CNAG_05288	3229.33	-0.399196	0.14775	-2.70183	0.00689581	0.0179443
CNAG_12827	3562.84	-0.398846	0.141806	-2.81262	0.00491397	0.0134457
CNAG_05832	7.75053	-0.398834	0.476233	-0.837477	0.402324	0.521826
CNAG_12330	96.9682	-0.398699	0.351119	-1.13551	0.256162	0.366742
CNAG_12771	136.279	-0.398509	0.361218	-1.10324	0.269925	0.381817
CNAG_03702	2471.02	-0.398382	0.0879257	-4.53089	5.87357e-06	4.14309e-05
CNAG_12699	116.675	-0.398318	0.245093	-1.62517	0.104126	0.175943
CNAG_12076	1.51325	-0.397948	0.47605	-0.835937	0.40319	0.522703
CNAG_02291	2471	-0.397843	0.136967	-2.90466	0.00367653	0.0104676
CNAG_12193	39.6894	-0.397709	0.317731	-1.25171	0.210674	0.31314
CNAG_06081	59363.1	-0.397526	0.149315	-2.66234	0.00776003	0.019881
CNAG_02572	227.435	-0.397216	0.217611	-1.82535	0.0679489	0.123338
CNAG_05764	5824.7	-0.397177	0.0839918	-4.72876	2.2589e-06	1.82296e-05
CNAG_12915	709.516	-0.397153	0.13992	-2.83842	0.00453369	0.0125378
CNAG_00677	1790.68	-0.396945	0.163487	-2.428	0.0151824	0.0351977
CNAG_01891	1942.29	-0.396581	0.180998	-2.19108	0.0284457	0.0596706
CNAG_05831	465.477	-0.396517	0.155265	-2.5538	0.0106554	0.025974
CNAG_12873	1165.07	-0.396488	0.123701	-3.20521	0.00134966	0.00448336
CNAG_01091	12951.6	-0.396446	0.0820473	-4.83192	1.35219e-06	1.16134e-05
CNAG_13165	172.553	-0.39613	0.175025	-2.26327	0.0236192	0.0508721
CNAG_12298	425.523	-0.395775	0.127832	-3.09606	0.00196108	0.00614961
CNAG_03746	1590.98	-0.395038	0.135247	-2.92086	0.00349064	0.0100071
CNAG_03435	23114.9	-0.395003	0.0950227	-4.15693	3.22553e-05	0.000180264
CNAG_06386	2639.73	-0.394878	0.12067	-3.27239	0.00106643	0.00365533
CNAG_00740	5873.84	-0.394467	0.19276	-2.04642	0.0407151	0.0806131
CNAG_03512	4452.13	-0.394447	0.0875629	-4.50473	6.64579e-06	4.59769e-05
CNAG_00728	2201.82	-0.394382	0.125279	-3.14803	0.00164377	0.00529483
CNAG_04887	107.635	-0.394081	0.246529	-1.59852	0.109928	0.183908
CNAG_00852	5195.4	-0.3938	0.0988614	-3.98336	6.79484e-05	0.000343598
CNAG_06756	3679.13	-0.393789	0.15346	-2.56608	0.0102855	0.0251911
CNAG_03885	5205.42	-0.393762	0.0987406	-3.98784	6.66779e-05	0.000337585
CNAG_06605	67934.7	-0.39374	0.0612251	-6.43102	1.26747e-10	3.20503e-09
CNAG_00561	4414.54	-0.393628	0.070699	-5.56765	2.58193e-08	3.52538e-07
CNAG_01430	3656.65	-0.393566	0.170546	-2.30768	0.0210169	0.0461303
CNAG_04376	9270.28	-0.393545	0.132828	-2.96282	0.00304831	0.00892734
CNAG_01620	1719.7	-0.39341	0.205922	-1.91048	0.0560716	0.105331
CNAG_00060	3549.35	-0.393357	0.0940189	-4.18381	2.86669e-05	0.000163069
CNAG_03370	17702.3	-0.393244	0.10297	-3.81903	0.000133977	0.000613822
CNAG_00845	7541.41	-0.392987	0.156816	-2.50604	0.0122093	0.029212
CNAG_07816	25.8425	-0.392827	0.3686	-1.06573	0.286547	0.400828
CNAG_01847	1780.22	-0.392521	0.345161	-1.13721	0.25545	0.365976
CNAG_05341	737.064	-0.392268	0.189177	-2.07355	0.0381214	0.0761876
CNAG_03744	97.4832	-0.391959	0.249757	-1.56936	0.116564	0.192818
CNAG_01631	5061.65	-0.391934	0.112108	-3.49603	0.000472231	0.00182124
CNAG_10135	1.58402	-0.391558	0.441015	-0.887857	0.374618	0.493614
CNAG_01401	526.217	-0.390755	0.148958	-2.62325	0.00870966	0.0218744
CNAG_04047	5209.57	-0.390536	0.111705	-3.49612	0.000472075	0.00182124
CNAG_07628	22849.8	-0.390368	0.117578	-3.32009	0.000899888	0.00317779
CNAG_01092	3790.5	-0.390345	0.0957578	-4.07638	4.57425e-05	0.000242711
CNAG_03884	11003.5	-0.390262	0.126084	-3.09526	0.00196643	0.00615941
CNAG_12725	53.4493	-0.3901	0.226108	-1.72528	0.0844763	0.148429
CNAG_05040	4.48219	-0.388855	0.481514	-0.807567	0.41934	0.53917
CNAG_12224	81.6646	-0.388822	0.328751	-1.18272	0.236919	0.343825
CNAG_12462	15.4538	-0.38817	0.457123	-0.849157	0.395794	0.515254
CNAG_06234	48.2853	-0.388051	0.469987	-0.825663	0.408995	0.528411
CNAG_04279	4871.97	-0.387941	0.144466	-2.68534	0.00724554	0.0187542
CNAG_04115	3793.25	-0.387863	0.089715	-4.32328	1.53725e-05	9.47972e-05
CNAG_05078	13148.5	-0.387431	0.0855165	-4.53048	5.88508e-06	4.14758e-05
CNAG_05485	5299.46	-0.387324	0.132802	-2.91656	0.00353913	0.0101216
CNAG_01833	11034.6	-0.387195	0.112278	-3.44855	0.000563608	0.00212646
CNAG_03478	2020.54	-0.387178	0.171223	-2.26125	0.0237435	0.0510759
CNAG_01439	3904.57	-0.387113	0.0990049	-3.91004	9.22797e-05	0.000444401
CNAG_12872	273.119	-0.386975	0.471436	-0.820843	0.411736	0.531537
CNAG_03225	41455.9	-0.386588	0.0784755	-4.92622	8.38342e-07	7.61861e-06
CNAG_03397	17986.1	-0.386551	0.0847318	-4.56206	5.0655e-06	3.62859e-05
CNAG_04678	9713.96	-0.386437	0.0952652	-4.05643	4.98284e-05	0.000261213
CNAG_01856	4194.44	-0.386036	0.126419	-3.05363	0.00226088	0.0069452
CNAG_07382	7665.17	-0.386015	0.107274	-3.5984	0.000320183	0.00130338
CNAG_05675	2913.96	-0.385494	0.164874	-2.33812	0.0193811	0.0431919
CNAG_04920	5490.78	-0.385427	0.262854	-1.46632	0.142562	0.227309
CNAG_12660	584.075	-0.385317	0.107154	-3.59593	0.000323238	0.00131517
CNAG_13078	479.435	-0.385067	0.225092	-1.71071	0.0871346	0.151908
CNAG_02826	2786.59	-0.384832	0.120099	-3.20429	0.00135394	0.00449398
CNAG_00392	1426.43	-0.384693	0.140413	-2.73972	0.00614916	0.0162981
CNAG_12176	140.934	-0.384597	0.29108	-1.32128	0.186409	0.283948
CNAG_00062	7647.94	-0.38438	0.090868	-4.2301	2.33589e-05	0.000136819
CNAG_13028	247.525	-0.384221	0.270236	-1.4218	0.155086	0.243108
CNAG_06847	17563.4	-0.384147	0.107724	-3.56602	0.00036245	0.0014498
CNAG_12133	32.4539	-0.384069	0.342098	-1.12269	0.26157	0.372574
CNAG_04539	2430.57	-0.383957	0.106939	-3.59043	0.000330128	0.00133717
CNAG_06247	889.856	-0.383812	0.11837	-3.24248	0.00118496	0.00400528
CNAG_03641	14294.8	-0.383758	0.0867658	-4.42291	9.73786e-06	6.33496e-05
CNAG_00666	14784.8	-0.383624	0.176029	-2.17932	0.0293078	0.0611538
CNAG_05017	2851.79	-0.3835	0.129242	-2.96731	0.00300421	0.00882315
CNAG_01530	12129.6	-0.38343	0.153312	-2.50098	0.012385	0.0295728
CNAG_07676	73346.8	-0.383397	0.139959	-2.73936	0.00615598	0.016311
CNAG_12313	384.083	-0.382904	0.267251	-1.43275	0.15193	0.238755
CNAG_00811	4738.33	-0.382556	0.0760241	-5.03203	4.85316e-07	4.67462e-06
CNAG_01735	42513.3	-0.381765	0.186518	-2.0468	0.0406782	0.0805593
CNAG_01454	13073.8	-0.381392	0.13734	-2.77698	0.0054866	0.0147687
CNAG_02011	2397.38	-0.380842	0.139442	-2.73119	0.00631064	0.016641
CNAG_00837	3266.33	-0.380809	0.175813	-2.16599	0.0303116	0.0628863
CNAG_00241	7132.99	-0.380635	0.142799	-2.66553	0.00768678	0.0197239
CNAG_00240	5241.4	-0.380547	0.138788	-2.74193	0.00610802	0.0162046
CNAG_00519	9076.36	-0.380518	0.133839	-2.8431	0.0044677	0.0123965
CNAG_12708	17.8058	-0.380468	0.351644	-1.08197	0.279267	0.392778
CNAG_04292	5606.9	-0.379771	0.116297	-3.26552	0.00109262	0.00373428
CNAG_04400	2404.29	-0.379486	0.0890243	-4.26272	2.0195e-05	0.000120501
CNAG_07735	13530.4	-0.378993	0.156105	-2.42781	0.0151903	0.0352062
CNAG_01455	19605.3	-0.378874	0.101386	-3.73695	0.000186265	0.000818537
CNAG_05757	9227.78	-0.378861	0.180862	-2.09475	0.0361929	0.073038
CNAG_07599	5760.29	-0.37842	0.189216	-1.99993	0.0455077	0.0882263
CNAG_04896	3479.93	-0.377974	0.112695	-3.35395	0.000796668	0.00286828
CNAG_12875	106.955	-0.377707	0.268352	-1.4075	0.159278	0.248465
CNAG_07766	5350.93	-0.377194	0.107843	-3.49764	0.000469402	0.00181371
CNAG_00010	18869.6	-0.377098	0.206914	-1.82249	0.0683814	0.123933
CNAG_01183	4650.95	-0.37675	0.0953811	-3.94995	7.81684e-05	0.00038609
CNAG_03339	1096.82	-0.3765	0.112601	-3.34368	0.000826758	0.00296246
CNAG_05320	1368.77	-0.376211	0.135202	-2.78259	0.00539268	0.0145632
CNAG_12219	18.717	-0.376055	0.351912	-1.06861	0.285247	0.399616
CNAG_01398	14085.6	-0.375873	0.147393	-2.55013	0.0107681	0.0262027
CNAG_07921	6880.74	-0.375444	0.157214	-2.38811	0.0169352	0.0385601
CNAG_06907	195.921	-0.375198	0.251025	-1.49467	0.135002	0.217536
CNAG_04830	1249.37	-0.374608	0.143115	-2.61754	0.00885663	0.0221764
CNAG_05399	232.514	-0.374375	0.238744	-1.5681	0.116857	0.193161
CNAG_04142	7148.69	-0.374297	0.405945	-0.922038	0.356509	0.474886
CNAG_02485	33712.7	-0.373522	0.0554446	-6.73686	1.61848e-11	4.9866e-10
CNAG_03311	15635.8	-0.373352	0.177394	-2.10465	0.0353219	0.071629
CNAG_03293	6612.18	-0.37253	0.13887	-2.68258	0.00730561	0.0188778
CNAG_05844	2456.88	-0.37241	0.140511	-2.6504	0.00803954	0.0204277
CNAG_03043	1047.65	-0.372188	0.110946	-3.35466	0.000794612	0.00286212
CNAG_05121	6155.62	-0.371151	0.125631	-2.95431	0.00313374	0.00913236
CNAG_05499	4467.15	-0.370968	0.118829	-3.12187	0.00179708	0.00571534
CNAG_04968	1323.85	-0.370816	0.175728	-2.11017	0.0348437	0.0708152
CNAG_06748	9155.49	-0.370752	0.121923	-3.04088	0.00235889	0.00719033
CNAG_00095	4821.85	-0.370458	0.194422	-1.90543	0.056724	0.10636
CNAG_06118	4092.36	-0.370276	0.201521	-1.83741	0.0661494	0.120706
CNAG_01820	52532.6	-0.370261	0.0756569	-4.89395	9.88298e-07	8.79808e-06
CNAG_07332	3202.18	-0.37011	0.125429	-2.95076	0.00316996	0.00921424
CNAG_00986	1664.02	-0.369828	0.0876288	-4.22039	2.43879e-05	0.000141943
CNAG_02820	5228	-0.369815	0.116126	-3.1846	0.00144956	0.00474672
CNAG_04277	3812.54	-0.369741	0.110611	-3.3427	0.000829669	0.00296904
CNAG_03931	22937.2	-0.369146	0.0625172	-5.90472	3.53247e-09	6.02801e-08
CNAG_01929	2495.19	-0.368915	0.125716	-2.93451	0.00334071	0.00963053
CNAG_04175	6762.47	-0.368849	0.154378	-2.38926	0.0168824	0.0384717
CNAG_04936	5352.7	-0.368723	0.168137	-2.193	0.0283076	0.0594108
CNAG_12160	145.85	-0.368708	0.276303	-1.33443	0.182063	0.278299
CNAG_01598	6349.22	-0.368596	0.105429	-3.49615	0.000472029	0.00182124
CNAG_00257	7139.38	-0.368524	0.175355	-2.10159	0.0355894	0.0719953
CNAG_02171	3131.61	-0.368467	0.145007	-2.54102	0.0110528	0.0268324
CNAG_01655	10741.9	-0.368092	0.0887673	-4.14671	3.37294e-05	0.000187617
CNAG_06384	3638.1	-0.367634	0.167079	-2.20036	0.0277817	0.0584848
CNAG_05926	4445.62	-0.367584	0.103341	-3.55699	0.000375127	0.00149685
CNAG_07429	5864.97	-0.367507	0.0894015	-4.11074	3.94391e-05	0.000213223
CNAG_04575	9380.52	-0.366158	0.136438	-2.68369	0.00728148	0.0188377
CNAG_12543	96.631	-0.366076	0.244391	-1.49791	0.134156	0.216445
CNAG_04334	7906.21	-0.365972	0.108572	-3.37078	0.000749556	0.00271044
CNAG_12416	110.845	-0.365951	0.200957	-1.82104	0.0686011	0.124304
CNAG_01365	2455.07	-0.36583	0.159154	-2.29859	0.0215284	0.0470413
CNAG_12760	192.123	-0.365634	0.24499	-1.49245	0.135582	0.218326
CNAG_01079	181.496	-0.365603	0.223376	-1.63672	0.101689	0.172817
CNAG_07572	9110.09	-0.365179	0.14362	-2.54267	0.0110008	0.026714
CNAG_00192	3493.78	-0.364954	0.227034	-1.60749	0.107947	0.18118
CNAG_03635	469.887	-0.364928	0.179918	-2.0283	0.04253	0.083449
CNAG_06246	60450.1	-0.364612	0.0586501	-6.21673	5.0763e-10	1.09563e-08
CNAG_05920	1914	-0.364575	0.109553	-3.32783	0.000875261	0.00310272
CNAG_02037	5924.41	-0.364472	0.0749907	-4.86023	1.17251e-06	1.02508e-05
CNAG_07542	1615.42	-0.364464	0.137918	-2.6426	0.0082271	0.0208329
CNAG_02412	2374.68	-0.364327	0.192613	-1.8915	0.0585572	0.109233
CNAG_03835	1284.55	-0.364294	0.193727	-1.88045	0.0600474	0.111461
CNAG_03440	2025.77	-0.364293	0.16011	-2.27527	0.0228898	0.0495199
CNAG_12067	418.437	-0.364243	0.213276	-1.70785	0.087665	0.152608
CNAG_06604	1862.14	-0.364067	0.136269	-2.67168	0.00754722	0.0194259
CNAG_06932	1163.92	-0.36402	0.283943	-1.28202	0.199835	0.300315
CNAG_04178	1212.83	-0.363855	0.192411	-1.89103	0.0586204	0.109302
CNAG_05550	6476.45	-0.36376	0.11017	-3.30181	0.000960625	0.00335228
CNAG_02309	3019.29	-0.363691	0.111016	-3.27601	0.00105284	0.0036215
CNAG_12192	1050.62	-0.363533	0.220853	-1.64604	0.0997556	0.170013
CNAG_01802	6183.8	-0.363471	0.106387	-3.41651	0.000634302	0.00235851
CNAG_12979	167.296	-0.363424	0.242834	-1.49659	0.134499	0.216873
CNAG_00346	1254.89	-0.363329	0.134572	-2.69988	0.00693644	0.0180387
CNAG_03485	4839.6	-0.363229	0.15755	-2.30548	0.0211398	0.0463509
CNAG_05535	12164.5	-0.362915	0.189742	-1.91268	0.0557896	0.104897
CNAG_05151	4562.14	-0.362172	0.12358	-2.93067	0.00338229	0.00973779
CNAG_07889	4343.78	-0.361882	0.118287	-3.05937	0.00221804	0.00684151
CNAG_06906	19442.4	-0.361872	0.0826061	-4.3807	1.18301e-05	7.53058e-05
CNAG_12056	158.886	-0.36164	0.401678	-0.900323	0.367948	0.48614
CNAG_05230	2237.09	-0.361609	0.148033	-2.44275	0.0145758	0.0339815
CNAG_02287	1771.45	-0.361343	0.120744	-2.99264	0.00276572	0.0082573
CNAG_00455	13270.9	-0.361295	0.155541	-2.32283	0.0201885	0.0446074
CNAG_03966	4341.78	-0.361259	0.22054	-1.63806	0.101408	0.172511
CNAG_12478	1.19995	-0.361244	0.430491	-0.839143	0.401389	0.520938
CNAG_03116	6564.57	-0.360948	0.101552	-3.55433	0.000378944	0.0015085
CNAG_06630	6738.12	-0.360826	0.0854442	-4.22295	2.41128e-05	0.000140539
CNAG_06381	17392.6	-0.360717	0.124854	-2.88911	0.00386338	0.0109208
CNAG_03977	2434.47	-0.36068	0.205572	-1.75452	0.0793422	0.140781
CNAG_13116	62.1693	-0.36053	0.323695	-1.1138	0.265367	0.376732
CNAG_12101	162.766	-0.360504	0.260754	-1.38255	0.166804	0.258454
CNAG_07561	105092	-0.360034	0.0663632	-5.4252	5.78885e-08	7.0764e-07
CNAG_05998	4756.59	-0.360017	0.125799	-2.86184	0.00421188	0.0117893
CNAG_12338	11.0133	-0.359703	0.484744	-0.742048	0.458058	0.578101
CNAG_04984	2918.89	-0.359536	0.151463	-2.37375	0.0176085	0.0398433
CNAG_01788	5137.01	-0.359442	0.0809773	-4.43879	9.04648e-06	5.9395e-05
CNAG_04844	15065.9	-0.358957	0.0728376	-4.92819	8.29945e-07	7.55889e-06
CNAG_12047	53.0316	-0.358899	0.225816	-1.58934	0.111983	0.186669
CNAG_01712	5679	-0.358519	0.112821	-3.17776	0.00148417	0.00484475
CNAG_01930	6129.38	-0.358094	0.187294	-1.91193	0.0558851	0.105029
CNAG_01770	9866.9	-0.357813	0.0711551	-5.02863	4.93993e-07	4.74416e-06
CNAG_03576	51.8239	-0.357493	0.27383	-1.30553	0.191712	0.290424
CNAG_01599	3330.08	-0.35745	0.0789947	-4.52499	6.03989e-06	4.22436e-05
CNAG_04045	2650.73	-0.357383	0.0962129	-3.7145	0.000203607	0.000885358
CNAG_12953	60.9044	-0.356647	0.350519	-1.01748	0.308925	0.424675
CNAG_04146	6639.64	-0.355703	0.142859	-2.48989	0.0127784	0.0304243
CNAG_13081	104.157	-0.355543	0.300217	-1.18429	0.236299	0.342986
CNAG_00798	1445.2	-0.355492	0.111188	-3.19723	0.00138756	0.00458536
CNAG_06422	12713.6	-0.355447	0.11429	-3.11005	0.00187058	0.00592637
CNAG_12826	12.1897	-0.355351	0.424235	-0.837626	0.402241	0.521798
CNAG_02421	6238.61	-0.355269	0.075638	-4.69697	2.64055e-06	2.07834e-05
CNAG_00813	111.695	-0.355014	0.240624	-1.47539	0.140108	0.224303
CNAG_01827	575.574	-0.354782	0.205832	-1.72365	0.0847713	0.148771
CNAG_07938	6971.09	-0.354735	0.2132	-1.66387	0.0961394	0.164901
CNAG_01164	37651.5	-0.354572	0.0660656	-5.36697	8.00723e-08	9.48056e-07
CNAG_01638	1981.31	-0.354383	0.131477	-2.69539	0.00703054	0.0182605
CNAG_04030	1851.26	-0.353755	0.105674	-3.34762	0.000815099	0.00292321
CNAG_03388	8865.67	-0.353682	0.0729258	-4.84989	1.23533e-06	1.07208e-05
CNAG_04451	3620.52	-0.352746	0.0870082	-4.05417	5.03117e-05	0.000263146
CNAG_05105	18147.8	-0.352536	0.0976841	-3.60894	0.00030745	0.00125959
CNAG_03643	984.311	-0.352165	0.145765	-2.41598	0.0156927	0.0362086
CNAG_05549	6689.98	-0.351966	0.152259	-2.31163	0.0207983	0.0457475
CNAG_06816	1692.71	-0.35195	0.0854033	-4.12103	3.77174e-05	0.000204985
CNAG_02825	6399.16	-0.351867	0.0663046	-5.30682	1.11551e-07	1.26476e-06
CNAG_00372	12000.8	-0.351699	0.126251	-2.78571	0.00534104	0.0144473
CNAG_13050	132.266	-0.351545	0.288263	-1.21953	0.222643	0.327291
CNAG_04119	6261.12	-0.351503	0.218362	-1.60973	0.107458	0.180468
CNAG_00059	1546.44	-0.351456	0.1487	-2.36353	0.0181017	0.0407218
CNAG_05877	1282.16	-0.351089	0.111541	-3.14761	0.00164609	0.00529943
CNAG_12167	74.3842	-0.350882	0.280997	-1.2487	0.211774	0.314548
CNAG_01058	2352.66	-0.350334	0.115321	-3.03792	0.00238221	0.00725606
CNAG_02374	3193.24	-0.349921	0.166422	-2.10261	0.0354997	0.0718482
CNAG_05527	8217.23	-0.349822	0.214969	-1.62731	0.103671	0.175423
CNAG_05895	7255.37	-0.349739	0.119025	-2.93836	0.00329959	0.00953699
CNAG_00741	21191.5	-0.349522	0.0575465	-6.07373	1.24971e-09	2.39758e-08
CNAG_07469	16526.9	-0.34816	0.122829	-2.83451	0.00458957	0.0126837
CNAG_06123	17991	-0.348131	0.0735815	-4.73123	2.23159e-06	1.80619e-05
CNAG_12647	1331.82	-0.34804	0.138822	-2.50709	0.0121729	0.029167
CNAG_01292	5904.58	-0.347533	0.155753	-2.23131	0.0256608	0.0546867
CNAG_04777	3061.5	-0.347313	0.125354	-2.77065	0.00559443	0.0150151
CNAG_01816	545.803	-0.347137	0.172583	-2.01142	0.0442813	0.0862117
CNAG_01400	13515.1	-0.347106	0.0988229	-3.51241	0.000444064	0.00173106
CNAG_00527	8359.49	-0.346989	0.113245	-3.06405	0.00218364	0.00674796
CNAG_03289	8732.28	-0.346926	0.0741663	-4.67768	2.9014e-06	2.23525e-05
CNAG_05659	21.4572	-0.346423	0.409106	-0.846779	0.397118	0.516645
CNAG_02775	101416	-0.346399	0.0950288	-3.6452	0.000267185	0.00111615
CNAG_04012	1996.92	-0.346345	0.117454	-2.94878	0.00319034	0.00926149
CNAG_05111	4864.32	-0.346288	0.114286	-3.03	0.00244552	0.00742418
CNAG_02008	50363	-0.346031	0.136899	-2.52763	0.0114836	0.0277319
CNAG_02534	2796.93	-0.345693	0.0823433	-4.19819	2.69056e-05	0.000154535
CNAG_05829	6692.87	-0.345444	0.1471	-2.34835	0.0188567	0.0421705
CNAG_12924	414.542	-0.344913	0.12945	-2.66445	0.00771133	0.0197685
CNAG_03740	356.528	-0.344746	0.157975	-2.18227	0.0290893	0.0607744
CNAG_02814	13855	-0.344725	0.160133	-2.15274	0.0313393	0.0648097
CNAG_05755	9450.42	-0.344717	0.158312	-2.17745	0.029447	0.0614134
CNAG_02396	2841.96	-0.344686	0.118702	-2.9038	0.00368669	0.0104893
CNAG_12220	118.662	-0.343955	0.4779	-0.719723	0.471696	0.590308
CNAG_05352	5495.76	-0.343377	0.0852663	-4.02711	5.64659e-05	0.000291764
CNAG_03400	1478.19	-0.343056	0.126366	-2.71478	0.00663193	0.0173667
CNAG_12319	285.883	-0.342929	0.217077	-1.57976	0.114163	0.189616
CNAG_04707	1649.12	-0.342923	0.144317	-2.37618	0.0174928	0.0396229
CNAG_02845	5145.1	-0.342792	0.0938621	-3.65208	0.000260126	0.00109161
CNAG_06641	5785.98	-0.342747	0.117124	-2.92635	0.00342965	0.0098595
CNAG_12791	6.5212	-0.342607	0.480663	-0.71278	0.475982	0.593849
CNAG_00407	108375	-0.34257	0.21994	-1.55756	0.119337	0.196578
CNAG_06463	149.109	-0.34253	0.204902	-1.67167	0.0945885	0.162713
CNAG_06367	10809.6	-0.342384	0.132378	-2.58641	0.00969822	0.0239651
CNAG_06747	20187.7	-0.342311	0.0923084	-3.70834	0.000208624	0.000903916
CNAG_04174	1369.03	-0.342306	0.13942	-2.45521	0.0140802	0.0329837
CNAG_06838	4248.49	-0.34227	0.0998257	-3.42868	0.000606524	0.00226844
CNAG_01885	4174.35	-0.342223	0.133122	-2.57075	0.0101478	0.0249051
CNAG_05897	716.58	-0.341082	0.144033	-2.36808	0.0178808	0.0403584
CNAG_04505	9230.35	-0.340741	0.103497	-3.29227	0.000993821	0.00345503
CNAG_01678	12325.5	-0.340737	0.129392	-2.63337	0.00845419	0.0213493
CNAG_01797	4653.45	-0.340562	0.060983	-5.58454	2.34319e-08	3.24755e-07
CNAG_03193	450.92	-0.340519	0.15453	-2.20358	0.0275536	0.0580636
CNAG_01364	5809.57	-0.340459	0.0759299	-4.48386	7.33049e-06	4.9881e-05
CNAG_07322	7684.12	-0.340149	0.120346	-2.82641	0.00470725	0.0129571
CNAG_07015	4917.26	-0.340042	0.146145	-2.32675	0.0199788	0.0442385
CNAG_00482	5386.9	-0.339507	0.0749831	-4.52778	5.96073e-06	4.19377e-05
CNAG_06830	12927.2	-0.339506	0.115545	-2.9383	0.0033002	0.00953699
CNAG_00932	4466.53	-0.339375	0.228047	-1.48818	0.136703	0.219744
CNAG_06899	8074.2	-0.339174	0.0854658	-3.96853	7.23169e-05	0.000362992
CNAG_02099	58196.3	-0.339088	0.195164	-1.73745	0.0823077	0.145296
CNAG_01646	2800.4	-0.33897	0.0854257	-3.96801	7.24764e-05	0.000363171
CNAG_02321	67.289	-0.338792	0.264068	-1.28297	0.199502	0.300031
CNAG_02162	3660.76	-0.338731	0.121226	-2.7942	0.00520285	0.014129
CNAG_02870	4282.86	-0.338681	0.158705	-2.13403	0.0328402	0.0675383
CNAG_00762	4981.73	-0.338659	0.142691	-2.37337	0.0176267	0.0398712
CNAG_07795	41.8318	-0.338552	0.29692	-1.14021	0.254198	0.364559
CNAG_03866	4652.93	-0.338357	0.167009	-2.02598	0.0427667	0.0837594
CNAG_06438	119.761	-0.338055	0.277462	-1.21838	0.223078	0.327756
CNAG_04304	16028.7	-0.33801	0.0535839	-6.30805	2.82577e-10	6.43406e-09
CNAG_06061	13776.3	-0.338002	0.112645	-3.0006	0.0026945	0.00806792
CNAG_04000	1930.58	-0.337789	0.0829889	-4.07029	4.69547e-05	0.000247873
CNAG_07815	2808.17	-0.337367	0.137841	-2.44751	0.0143847	0.0335926
CNAG_12010	19.9999	-0.337315	0.483868	-0.697122	0.485726	0.603463
CNAG_00401	4441.13	-0.33726	0.113821	-2.96306	0.00304595	0.00892675
CNAG_01811	3989.95	-0.337096	0.123371	-2.73239	0.00628773	0.0165911
CNAG_02844	3420.69	-0.337011	0.111392	-3.02545	0.00248262	0.00751222
CNAG_12159	81.5325	-0.336943	0.429637	-0.784251	0.432893	0.552226
CNAG_06689	3933.74	-0.336599	0.141649	-2.37629	0.0174876	0.0396219
CNAG_13162	615.216	-0.336474	0.182783	-1.84084	0.0656448	0.120023
CNAG_02463	267.701	-0.336329	0.228082	-1.4746	0.14032	0.224555
CNAG_02795	2332.9	-0.335622	0.143596	-2.33727	0.0194251	0.0432578
CNAG_06184	3550.33	-0.335617	0.120448	-2.78639	0.0053298	0.0144261
CNAG_05606	2339.26	-0.335568	0.165168	-2.03168	0.0421862	0.0828725
CNAG_03284	4089.25	-0.335286	0.152865	-2.19335	0.0282821	0.0593723
CNAG_00166	6421.32	-0.33506	0.143984	-2.32707	0.0199615	0.0442237
CNAG_00178	5948.75	-0.335057	0.105012	-3.19065	0.00141952	0.0046668
CNAG_02809	6754.49	-0.335027	0.158044	-2.11983	0.0340204	0.0694657
CNAG_06330	1183.64	-0.334705	0.117044	-2.85965	0.00424106	0.0118469
CNAG_05457	12535.8	-0.334586	0.132343	-2.52817	0.011466	0.0277056
CNAG_07471	581.542	-0.334356	0.151134	-2.21231	0.0269453	0.0569555
CNAG_01665	2356.62	-0.334307	0.157731	-2.11948	0.0340501	0.0695092
CNAG_06340	13033.4	-0.334016	0.133369	-2.50446	0.0122638	0.0293087
CNAG_03196	4053.91	-0.333679	0.0854454	-3.90517	9.41597e-05	0.000452665
CNAG_12251	27.3953	-0.333241	0.472813	-0.704805	0.480931	0.598903
CNAG_02916	20341.2	-0.332977	0.0722272	-4.61013	4.02408e-06	2.98582e-05
CNAG_06739	5522.41	-0.332626	0.0776513	-4.28359	1.83901e-05	0.000111266
CNAG_03949	1368.75	-0.332417	0.115358	-2.88161	0.00395651	0.0111422
CNAG_02085	2524.35	-0.332281	0.118412	-2.80613	0.00501399	0.0136697
CNAG_05045	2834.97	-0.332225	0.110536	-3.00559	0.0026507	0.00795402
[truncated: 6,408 more rows]
