# Supplementary material for: The fungal pathogen Cryptococcus neoformans adapts to the host environment through TOR-mediated remodeling of phospholipid asymmetry
Source: Research Square preprint supplement (doi:10.21203/rs.3.rs-2828872/v1), 2023-04-25
Supplement: Supplementary file 2 [file 2c8c7ca3529210abe619fdd9.xlsx]

## Sheet: GO-term analysis
term_ID	description	frequency	plot_X	plot_Y	log_size	value	uniqueness	dispensability	Gene set
GO:0006260	DNA replication	1.42935	-6.75041	-0.428509	5.63346	-8.07625	0.689894	0.342197	Elevated Expression
GO:0006725	cellular aromatic compound metabolic process	26.7929	-3.42871	6.58666	6.90634	-6.28597	0.871546	0.235045	Elevated Expression
GO:0006974	cellular response to DNA damage stimulus	2.55318	-4.55676	-6.1363	5.88541	-2.47708	0.921713	0.0110969	Elevated Expression
GO:0007049	cell cycle	1.79093	4.57917	5.09722	5.7314	-4.19478	0.982972	0.010582	Elevated Expression
GO:0010467	gene expression	16.6937	-3.92934	-0.0341782	6.70088	-2.02052	0.827128	0.215356	Elevated Expression
GO:0032259	methylation	3.16656	5.88234	1.68292	5.97891	-2.09375	0.957329	0.0410362	Elevated Expression
GO:0034470	ncRNA processing	2.67534	-6.6967	1.41802	5.9057	-18.2371	0.639595	0.0104677	Elevated Expression
GO:0034641	cellular nitrogen compound metabolic process	30.5453	-4.79594	5.14541	6.96327	-3.17398	0.853662	0.247385	Elevated Expression
GO:0042254	ribosome biogenesis	1.64752	3.74194	-3.20817	5.69515	-27.094	0.593878	0	Elevated Expression
GO:0043170	macromolecule metabolic process	38.6712	-0.182098	5.44931	7.06571	-3.74526	0.906003	0.191801	Elevated Expression
GO:0043414	macromolecule methylation	1.48174	-6.08592	-1.96968	5.6491	-2.97334	0.73287	0.369965	Elevated Expression
GO:0045230	capsule organization	0.00596346	4.44902	-2.64656	3.25406	-1.7576	0.777835	0.312215	Elevated Expression
GO:0046483	heterocycle metabolic process	26.7841	-4.7469	6.53666	6.9062	-6.89296	0.871555	0.125384	Elevated Expression
GO:0051301	cell division	1.37773	2.65529	0.923921	5.61749	-5.35765	0.983482	0.00963981	Elevated Expression
GO:0071840	cellular component organization or biogenesis	9.25724	-1.4557	-6.07844	6.44481	-12.8374	0.978825	0.0134788	Elevated Expression
GO:0090305	nucleic acid phosphodiester bond hydrolysis	1.01738	-7.79752	0.587651	5.48581	-2.77091	0.762942	0.328024	Elevated Expression
GO:0098813	nuclear chromosome segregation	0.199267	1.21478	-5.65105	4.77777	-3.38797	0.787544	0.00783444	Elevated Expression
GO:1901360	organic cyclic compound metabolic process	27.6401	0.95787	6.7959	6.91986	-5.72681	0.912722	0.0873981	Elevated Expression
GO:0005975	carbohydrate metabolic process	5.73213	-1.75114	7.80312	6.23664	-8.98354	0.920924	0.0936067	Decreased Expression
GO:0005977	glycogen metabolic process	0.159707	-5.25405	6.22181	4.68166	-3.62413	0.679879	0.0483273	Decreased Expression
GO:0006072	glycerol-3-phosphate metabolic process	0.120277	3.02009	-5.3133	4.55852	-3.0426	0.824558	0.39315	Decreased Expression
GO:0006082	organic acid metabolic process	8.85882	6.01534	2.41109	6.4257	-1.77094	0.767477	0.365906	Decreased Expression
GO:0006629	lipid metabolic process	4.54765	-5.192	-5.52457	6.13611	-1.95896	0.923022	0.0588491	Decreased Expression
GO:0006865	amino acid transport	0.608124	6.03217	-1.89224	5.26232	-4.36659	0.928501	0	Decreased Expression
GO:0006950	response to stress	4.85393	-6.39636	0.354841	6.16442	-1.96873	0.859547	0.39966	Decreased Expression
GO:0009098	leucine biosynthetic process	0.17069	4.72816	3.71384	4.71054	-3.62413	0.725882	0.00579426	Decreased Expression
GO:0009628	response to abiotic stimulus	0.550321	-6.78889	1.02425	5.21894	-4.71096	0.886535	0.257127	Decreased Expression
GO:0016042	lipid catabolic process	0.601835	-2.51987	5.20699	5.2578	-1.68729	0.92378	0.0678889	Decreased Expression
GO:0033013	tetrapyrrole metabolic process	0.811084	1.79536	5.12926	5.38739	-2.05094	0.8623	0.14536	Decreased Expression
GO:0033014	tetrapyrrole biosynthetic process	0.779412	3.56247	5.07351	5.37009	-2.17562	0.701847	0.293246	Decreased Expression
GO:0034605	cellular response to heat	0.050736	-6.6189	-0.809193	4.18367	-7.11889	0.82468	0	Decreased Expression
GO:0044281	small molecule metabolic process	15.0416	-2.06231	-7.03129	6.65562	-1.85195	0.94539	0.0351106	Decreased Expression
GO:0050896	response to stimulus	14.5879	-2.10971	-4.24765	6.64232	-2.04433	1	0	Decreased Expression
GO:0051179	localization	18.7424	0.703572	-0.121893	6.75115	-1.75232	1	0	Decreased Expression
GO:0051606	detection of stimulus	0.511628	-5.88688	1.21986	5.18728	-1.46928	0.887271	0.313839	Decreased Expression
GO:0052646	alditol phosphate metabolic process	0.166668	2.41918	-5.00973	4.70018	-3.0426	0.820161	0.0484888	Decreased Expression
GO:0055085	transmembrane transport	13.5004	6.16166	-1.32801	6.60867	-4.373	0.907805	0.389051	Decreased Expression
GO:0072524	pyridine-containing compound metabolic process	0.687175	2.37422	6.48422	5.31539	-1.83404	0.864353	0.196944	Decreased Expression
GO:0104004	cellular response to environmental stimulus	0.0880824	-5.47134	-0.19561	4.42323	-1.62762	0.889297	0.268718	Decreased Expression
GO:1901071	glucosamine-containing compound metabolic process	0.126815	2.20655	-5.71782	4.58151	-1.68729	0.888564	0.383815	Decreased Expression
