# Supplementary material for: The fungal pathogen Cryptococcus neoformans adapts to the host environment through TOR-mediated remodeling of phospholipid asymmetry
Source: Research Square preprint supplement (doi:10.21203/rs.3.rs-2828872/v1), 2023-04-25
Supplement: Supplementary file 3 [file 8546ab2cbe3620b79a541d51.xlsx]

## Sheet: RIM101_vs_H99_CO2
CNAG_XXXXX	baseMean	log2FoldChange	lfcSE	stat	pvalue	padj
CNAG_00001	800.822	-1.14852	0.153592	-7.47775	7.5605e-14	3.3477e-13
CNAG_00002	3803.9	0.640892	0.118264	5.41914	5.98855e-08	1.65972e-07
CNAG_00003	3616.79	0.194489	0.0686032	2.83499	0.00458272	0.00745566
CNAG_00004	4414.7	0.111014	0.0820982	1.35221	0.176309	0.222155
CNAG_00005	2545.25	-0.577574	0.170427	-3.38898	0.000701531	0.00127635
CNAG_00006	10655.9	0.258644	0.0707356	3.65648	0.000255698	0.000490298
CNAG_00007	7422.58	0.554268	0.0912803	6.07215	1.26205e-09	4.0425e-09
CNAG_00008	7168.79	-0.0501038	0.0702935	-0.71278	0.475982	0.535231
CNAG_00009	2842.9	-0.407305	0.113378	-3.59245	0.000327582	0.000619146
CNAG_00010	32390.1	0.53083	0.109671	4.84021	1.29705e-06	3.17676e-06
CNAG_00011	13699	-0.325354	0.0782779	-4.15639	3.23313e-05	6.82906e-05
CNAG_00012	4233.39	-1.13099	0.090941	-12.4365	1.6564e-35	2.32007e-34
CNAG_00013	5427.23	0.40738	0.0581087	7.01066	2.37198e-12	9.37968e-12
CNAG_00014	2046.56	0.343683	0.0851282	4.03724	5.4084e-05	0.000111602
CNAG_00015	5413.7	1.2415	0.109345	11.354	7.08758e-30	7.75903e-29
CNAG_00016	4034.81	0.5045	0.0968152	5.21096	1.87867e-07	4.97946e-07
CNAG_00017	4092.99	0.252707	0.099424	2.54171	0.011031	0.017056
CNAG_00018	5516.88	-0.309346	0.0907876	-3.40736	0.000655939	0.00119943
CNAG_00019	6013.4	0.616141	0.107888	5.71095	1.1235e-08	3.33008e-08
CNAG_00020	10705.1	-0.0114866	0.0675524	-0.17004	0.864979	0.892328
CNAG_00021	6933.81	1.4573	0.0914577	15.9341	3.67369e-57	9.40465e-56
CNAG_00022	1654.74	-0.508763	0.145938	-3.48615	0.000490023	0.000907409
CNAG_00023	2164.44	0.363764	0.115101	3.16038	0.00157563	0.00273337
CNAG_00024	61893.3	-0.114669	0.0691551	-1.65815	0.0972878	0.128891
CNAG_00025	18023.9	1.71336	0.0854719	20.0459	2.19393e-89	1.02548e-87
CNAG_00026	6319.33	0.752644	0.107301	7.01436	2.31008e-12	9.14361e-12
CNAG_00027	2564.94	-0.0229066	0.109385	-0.209413	0.834126	0.865436
CNAG_00028	5034.36	0.106648	0.0860551	1.2393	0.215233	0.265807
CNAG_00029	1825.88	-0.172975	0.101505	-1.7041	0.0883626	0.118006
CNAG_00030	498.576	-0.171969	0.148944	-1.15459	0.248259	0.301711
CNAG_00031	3813.32	0.00772391	0.0729981	0.10581	0.915733	0.93472
CNAG_00032	1133.09	0.584828	0.118001	4.95613	7.19107e-07	1.807e-06
CNAG_00033	108.171	0.813138	0.319815	2.54253	0.0110053	0.0170194
CNAG_00034	40665.3	0.186568	0.078312	2.38237	0.0172016	0.0258195
CNAG_00035	1619.86	0.114906	0.0932495	1.23225	0.217857	0.268529
CNAG_00036	3799.23	-0.560009	0.135394	-4.13616	3.53166e-05	7.4238e-05
CNAG_00038	4050.51	0.387494	0.125172	3.09569	0.00196354	0.00336353
CNAG_00039	23557.4	0.332691	0.0888608	3.74396	0.000181144	0.000354284
CNAG_00040	14321.6	0.0388081	0.0577588	0.6719	0.501648	0.56114
CNAG_00043	3343.19	-0.38708	0.0897558	-4.31259	1.6135e-05	3.52901e-05
CNAG_00044	3704.16	0.285704	0.0960867	2.9734	0.00294521	0.00490574
CNAG_00045	1434.19	0.0808011	0.135917	0.594489	0.552185	0.609874
CNAG_00046	7372.68	0.0667033	0.0677562	0.984461	0.324889	0.383306
CNAG_00047	10181.9	-0.918147	0.0702531	-13.0691	4.9428e-39	7.7301e-38
CNAG_00048	942.367	-0.469689	0.124053	-3.78621	0.000152962	0.000301645
CNAG_00049	2142.79	0.473047	0.128498	3.68135	0.000232005	0.000447031
CNAG_00050	1065.53	-1.26011	0.119811	-10.5175	7.1748e-26	6.57426e-25
CNAG_00051	21026.7	-0.615235	0.0655728	-9.38247	6.44443e-21	4.40222e-20
CNAG_00052	3460.29	0.403016	0.330856	1.2181	0.223185	0.274295
CNAG_00053	1487.29	-2.17319	0.170443	-12.7502	3.10762e-37	4.57618e-36
CNAG_00054	3157.35	-0.543248	0.172743	-3.14483	0.00166184	0.00287752
CNAG_00055	5312.22	0.354483	0.0773521	4.58272	4.58965e-06	1.06367e-05
CNAG_00056	2065.89	-0.397975	0.125593	-3.16878	0.00153081	0.00266005
CNAG_00057	24929.6	0.209634	0.135047	1.5523	0.12059	0.156767
CNAG_00058	9937.92	0.00600849	0.0661519	0.0908286	0.927629	0.944082
CNAG_00059	1590.72	1.02001	0.132649	7.68954	1.4767e-14	6.84465e-14
CNAG_00060	5422.4	0.412649	0.0786948	5.24367	1.57417e-07	4.19242e-07
CNAG_00061	29382.8	-0.800115	0.0966262	-8.28052	1.22636e-16	6.49893e-16
CNAG_00062	4926.98	0.24366	0.0869369	2.80273	0.00506726	0.0081911
CNAG_00063	2906.44	-0.39595	0.131896	-3.00199	0.00268217	0.00450185
CNAG_00064	3342.35	0.105059	0.0931079	1.12835	0.259171	0.313189
CNAG_00065	16328.7	0.107946	0.0492158	2.19332	0.028284	0.0412269
CNAG_00066	28334.7	-1.06649	0.0762209	-13.9921	1.74204e-44	3.20659e-43
CNAG_00067	11492	-0.691032	0.131059	-5.27269	1.3444e-07	3.60471e-07
CNAG_00068	18796.7	-1.26075	0.0944939	-13.3422	1.31544e-40	2.15018e-39
CNAG_00069	934.76	0.490342	0.169987	2.88458	0.00391934	0.00643046
CNAG_00070	56921.3	1.83257	0.134563	13.6187	3.10196e-42	5.41055e-41
CNAG_00072	4902.71	-0.347177	0.0808803	-4.29248	1.76691e-05	3.84935e-05
CNAG_00073	15882.1	-0.406542	0.0864641	-4.70187	2.57794e-06	6.14393e-06
CNAG_00074	14969.3	-0.67787	0.0919749	-7.37017	1.70416e-13	7.28601e-13
CNAG_00075	2074.85	-0.634964	0.12108	-5.24416	1.56998e-07	4.18394e-07
CNAG_00076	7801.71	0.123968	0.0917813	1.35069	0.176795	0.222667
CNAG_00077	36885.5	1.70385	0.130326	13.0738	4.65024e-39	7.28625e-38
CNAG_00078	3263.85	-0.128457	0.0903656	-1.42152	0.155166	0.197851
CNAG_00079	1091.9	-2.06431	0.149981	-13.7638	4.20817e-43	7.41779e-42
CNAG_00080	1211.2	-0.516312	0.125518	-4.11346	3.89775e-05	8.15831e-05
CNAG_00081	7160.24	-0.157302	0.0593387	-2.65092	0.00802731	0.0126611
CNAG_00082	3879.65	-0.37984	0.0852316	-4.45657	8.3282e-06	1.88136e-05
CNAG_00083	3262.92	0.287879	0.0794063	3.62539	0.000288525	0.000549446
CNAG_00084	8055.87	0.523046	0.0870146	6.01101	1.8437e-09	5.82809e-09
CNAG_00085	2162.93	0.0386055	0.153421	0.251631	0.801326	0.836992
CNAG_00086	6125.06	1.28906	0.122711	10.5048	8.20591e-26	7.48609e-25
CNAG_00087	5046.74	-0.619547	0.0785603	-7.88627	3.11353e-15	1.49651e-14
CNAG_00088	7871.62	0.0169754	0.0920247	0.184466	0.853648	0.882389
CNAG_00089	5766.65	0.534265	0.0940229	5.68229	1.32904e-08	3.91004e-08
CNAG_00090	4435.69	-0.544159	0.0774053	-7.03	2.0653e-12	8.20598e-12
CNAG_00091	96315.9	1.21131	0.235289	5.14817	2.63035e-07	6.89058e-07
CNAG_00092	7190.9	-0.36899	0.0754765	-4.88881	1.01449e-06	2.51506e-06
CNAG_00093	18513.9	-0.324757	0.159034	-2.04206	0.041146	0.0584089
CNAG_00094	5324.55	-0.489015	0.104161	-4.69481	2.66852e-06	6.33983e-06
CNAG_00095	4623.82	1.54177	0.122569	12.5788	2.76181e-36	3.91453e-35
CNAG_00096	2415.08	-0.669084	0.101543	-6.58915	4.4236e-11	1.58571e-10
CNAG_00097	10730	-0.647797	0.072125	-8.98159	2.66893e-19	1.67084e-18
CNAG_00098	5782.29	-1.64063	0.0822919	-19.9367	1.95359e-88	8.78586e-87
CNAG_00099	8323.34	1.03036	0.117363	8.77933	1.64451e-18	9.79607e-18
CNAG_00100	5922.02	0.262696	0.0941959	2.78883	0.0052899	0.00852131
CNAG_00101	4552.71	-0.775473	0.0956523	-8.10721	5.17964e-16	2.63576e-15
CNAG_00104	41836.8	0.268331	0.0959111	2.7977	0.00514675	0.00830185
CNAG_00105	1598.44	0.078153	0.0930324	0.840062	0.400874	0.460672
CNAG_00106	20248.6	1.88497	0.134748	13.9888	1.82451e-44	3.35099e-43
CNAG_00107	4028.65	2.09403	0.138786	15.0882	1.93715e-51	4.25205e-50
CNAG_00108	4575.17	0.643689	0.06503	9.89835	4.23196e-23	3.27229e-22
CNAG_00109	4153.89	0.574648	0.100921	5.69405	1.2406e-08	3.66281e-08
CNAG_00110	2334.28	-0.675881	0.14092	-4.79621	1.61695e-06	3.93248e-06
CNAG_00111	4664.55	0.273181	0.0920134	2.96893	0.00298841	0.00497272
CNAG_00115	6769.09	-0.941247	0.0852594	-11.0398	2.45595e-28	2.53832e-27
CNAG_00116	41773	0.206892	0.103468	1.99958	0.0455452	0.0639123
CNAG_00117	6773.9	-0.0965449	0.117076	-0.824638	0.409577	0.469831
CNAG_00118	2995.01	0.114551	0.110576	1.03595	0.300226	0.357402
CNAG_00119	1070.34	-0.44197	0.141267	-3.1286	0.00175639	0.00303241
CNAG_00120	2333.88	0.636888	0.098425	6.47079	9.74937e-11	3.39961e-10
CNAG_00121	16883.9	0.801986	0.0789448	10.1588	3.0274e-24	2.49139e-23
CNAG_00122	2871.75	-1.74989	0.122901	-14.2382	5.31044e-46	1.02275e-44
CNAG_00123	6946.34	-2.38732	0.185622	-12.8612	7.43993e-38	1.11935e-36
CNAG_00124	5517.88	0.489253	0.116255	4.20845	2.57129e-05	5.48682e-05
CNAG_00125	1411.27	-0.530475	0.18157	-2.92161	0.00348232	0.00574974
CNAG_00126	15157.9	-2.69442	0.0995	-27.0796	1.71389e-161	2.33764e-159
CNAG_00127	4335.86	0.0402998	0.0931863	0.432465	0.665404	0.714804
CNAG_00128	6068.21	0.805168	0.110732	7.27132	3.56001e-13	1.48915e-12
CNAG_00129	4269.92	0.154871	0.0743123	2.08405	0.0371555	0.0532072
CNAG_00130	57330.7	-0.383037	0.169691	-2.25727	0.0239915	0.0353291
CNAG_00131	1086.47	-0.415339	0.0948612	-4.37839	1.1956e-05	2.65619e-05
CNAG_00132	2807.28	-0.693173	0.0944636	-7.33799	2.16821e-13	9.22267e-13
CNAG_00133	2855.35	0.038727	0.106436	0.363851	0.71597	0.760386
CNAG_00134	2592.35	-0.368426	0.141677	-2.60047	0.00930953	0.0145401
CNAG_00135	1006.36	0.454704	0.146394	3.10602	0.00189625	0.0032563
CNAG_00136	12337.4	-0.481765	0.0788051	-6.11337	9.75463e-10	3.15301e-09
CNAG_00137	30676.3	-1.47273	0.074126	-19.868	7.70357e-88	3.42747e-86
CNAG_00138	8179.02	-1.41716	0.0859849	-16.4815	4.98233e-61	1.39572e-59
CNAG_00139	30786.5	0.244353	0.150668	1.6218	0.104847	0.137917
CNAG_00140	11186.9	-0.766276	0.0739269	-10.3653	3.5658e-25	3.10004e-24
CNAG_00141	11206.4	-0.135177	0.0744613	-1.8154	0.0694623	0.0945251
CNAG_00142	15367.6	0.86487	0.108637	7.96107	1.70561e-15	8.35236e-15
CNAG_00143	5693.9	0.404878	0.102957	3.93251	8.40639e-05	0.00017009
CNAG_00144	2166.98	-0.280442	0.0910602	-3.07974	0.00207182	0.00354026
CNAG_00145	3248.79	0.758109	0.11417	6.64015	3.13356e-11	1.13649e-10
CNAG_00146	4594.24	-0.905988	0.0793131	-11.4229	3.21237e-30	3.59716e-29
CNAG_00147	36101.6	-0.231031	0.0642132	-3.59787	0.000320834	0.00060722
CNAG_00148	12513.7	-0.405456	0.105434	-3.84558	0.000120267	0.000239957
CNAG_00149	12809	0.368994	0.0850011	4.34105	1.41802e-05	3.1228e-05
CNAG_00150	24833.8	0.00481723	0.0859634	0.0560381	0.955311	0.965289
CNAG_00151	3466.64	0.439447	0.0840763	5.22677	1.72501e-07	4.58532e-07
CNAG_00152	3020.67	0.523292	0.0853915	6.12815	8.89064e-10	2.88382e-09
CNAG_00153	2775.06	0.111601	0.0845377	1.32014	0.18679	0.23405
CNAG_00154	3053.53	0.485514	0.113799	4.26643	1.98626e-05	4.29573e-05
CNAG_00155	1.30582	-1.92736	3.38476	-0.569424	0.569068	0.625201
CNAG_00156	13206.9	-0.730451	0.0626942	-11.651	2.26718e-31	2.66803e-30
CNAG_00157	13159.5	0.659566	0.0809315	8.14968	3.64893e-16	1.87055e-15
CNAG_00158	894.145	0.0308616	0.147921	0.208636	0.834733	0.865957
CNAG_00159	727.697	0.502515	0.16365	3.07068	0.00213572	0.00364123
CNAG_00160	727.782	-0.284536	0.140924	-2.01907	0.0434796	0.061324
CNAG_00161	1134.49	-1.19302	0.169256	-7.0486	1.80731e-12	7.21191e-12
CNAG_00162	12725.5	-1.77294	0.172918	-10.2531	1.14629e-24	9.6922e-24
CNAG_00163	4836.14	-0.623137	0.0709063	-8.78817	1.52011e-18	9.08569e-18
CNAG_00164	10347.6	0.970925	0.10486	9.25927	2.05828e-20	1.3678e-19
CNAG_00165	60797.9	-2.52569	0.0800605	-31.5473	1.9519e-218	6.01473e-216
CNAG_00166	9208.01	0.706379	0.108026	6.53899	6.19364e-11	2.19468e-10
CNAG_00167	2013.16	-0.594866	0.0901562	-6.59817	4.16251e-11	1.49405e-10
CNAG_00171	1636.08	-0.489852	0.125749	-3.89547	9.80093e-05	0.000197204
CNAG_00172	3181.84	-0.640219	0.116529	-5.49406	3.92786e-08	1.10817e-07
CNAG_00173	4497.01	-0.163725	0.0849207	-1.92798	0.0538582	0.0746336
CNAG_00174	7823.46	0.0195053	0.107785	0.180965	0.856395	0.884861
CNAG_00175	6276.92	-0.667021	0.102609	-6.50061	7.99941e-11	2.81061e-10
CNAG_00176	7371.36	-0.292395	0.0896179	-3.26269	0.00110362	0.0019553
CNAG_00177	2367.5	-0.354533	0.0933501	-3.79789	0.000145934	0.000288333
CNAG_00178	10834.4	-0.244221	0.105788	-2.30859	0.0209663	0.0311
CNAG_00179	1726.14	0.215748	0.124624	1.7312	0.0834169	0.111904
CNAG_00180	1426.08	-0.53748	0.142229	-3.77899	0.000157468	0.000309944
CNAG_00181	4117.16	-0.649986	0.129308	-5.02665	4.99113e-07	1.27186e-06
CNAG_00182	4122.91	-0.465733	0.114845	-4.05532	5.00668e-05	0.000103698
CNAG_00183	5410.06	-1.86996	0.0885903	-21.1079	6.72527e-99	3.65714e-97
CNAG_00184	8365.75	-0.253255	0.087701	-2.88771	0.0038806	0.00636942
CNAG_00185	2756.47	-0.572304	0.101413	-5.64332	1.66802e-08	4.87457e-08
CNAG_00186	1117.22	-0.0205493	0.168184	-0.122184	0.902754	0.924383
CNAG_00187	4295.15	0.372132	0.0856511	4.34475	1.39437e-05	3.07315e-05
CNAG_00188	1559.68	0.249015	0.0977069	2.54859	0.0108159	0.016745
CNAG_00189	2870.63	-0.0496945	0.0881363	-0.563837	0.572865	0.628791
CNAG_00190	9085.88	-0.320568	0.0952404	-3.36588	0.000763006	0.00138305
CNAG_00191	9199.9	-0.222317	0.122758	-1.81101	0.0701393	0.0953996
CNAG_00192	5272.98	-0.130832	0.114891	-1.13875	0.254808	0.308656
CNAG_00193	13016.2	0.429005	0.0785158	5.46393	4.65703e-08	1.30547e-07
CNAG_00194	9460.69	0.229058	0.0844395	2.71268	0.00667409	0.0106295
CNAG_00195	6179.74	0.531759	0.0847003	6.27812	3.42681e-10	1.14918e-09
CNAG_00229	2351.93	-0.183751	0.111363	-1.65002	0.0989393	0.13085
CNAG_00231	2453.73	0.3501	0.102809	3.40534	0.000660811	0.00120675
CNAG_00232	66449.7	0.21199	0.105191	2.01528	0.0438751	0.0618295
CNAG_00233	2798.68	0.657391	0.124988	5.25965	1.44332e-07	3.85628e-07
CNAG_00234	2154.57	0.740775	0.112216	6.60131	4.07531e-11	1.46465e-10
CNAG_00235	25532.1	0.423384	0.0900267	4.70288	2.56519e-06	6.11704e-06
CNAG_00236	1169.14	-1.48657	0.146588	-10.1412	3.62682e-24	2.96999e-23
CNAG_00237	3508.16	-0.948243	0.262503	-3.61231	0.000303487	0.000576223
CNAG_00238	24215.1	0.414942	0.0945578	4.38824	1.14273e-05	2.54553e-05
CNAG_00239	5023.88	-0.0514955	0.114325	-0.450432	0.652399	0.702922
CNAG_00240	5811.19	0.181736	0.126589	1.43564	0.151104	0.193265
CNAG_00241	10425	0.967956	0.0943753	10.2565	1.10691e-24	9.36876e-24
CNAG_00242	765.899	-0.23376	0.151841	-1.53951	0.12368	0.160658
CNAG_00243	1709	0.399425	0.0902945	4.42358	9.70779e-06	2.17823e-05
CNAG_00246	3127.1	-0.465285	0.125589	-3.70482	0.000211539	0.000410257
CNAG_00247	11789.2	0.501425	0.126053	3.97788	6.95316e-05	0.000141686
CNAG_00248	4532.92	0.303854	0.123249	2.46536	0.0136875	0.020861
CNAG_00249	5742.62	-0.109152	0.0822438	-1.32717	0.184452	0.2314
CNAG_00250	2524.64	-1.69078	0.142209	-11.8894	1.34289e-32	1.6776e-31
CNAG_00251	1548.94	-0.26243	0.128012	-2.05004	0.0403601	0.057352
CNAG_00252	3168.25	0.183397	0.0804418	2.27987	0.0226154	0.0333605
CNAG_00253	3366.44	-0.233568	0.114551	-2.03899	0.0414514	0.0587923
CNAG_00254	3225.43	-0.497309	0.133834	-3.71587	0.000202502	0.000393373
CNAG_00255	7512.26	-0.301857	0.127252	-2.37212	0.0176861	0.026499
CNAG_00256	10047.4	0.753491	0.109006	6.91236	4.76652e-12	1.84797e-11
CNAG_00257	11221.2	0.761504	0.0731246	10.4138	2.1451e-25	1.88461e-24
CNAG_00258	8022.94	0.481716	0.0905689	5.31878	1.04463e-07	2.82834e-07
CNAG_00259	9760.79	1.18553	0.125761	9.42689	4.22427e-21	2.92639e-20
CNAG_00260	10448	-0.245538	0.0736085	-3.33572	0.000850774	0.00153147
CNAG_00261	167697	-0.348285	0.0771052	-4.517	6.27206e-06	1.43401e-05
CNAG_00262	418.114	-1.54215	0.171329	-9.0011	2.23466e-19	1.41065e-18
CNAG_00263	3705.93	-0.143597	0.0795481	-1.80516	0.0710491	0.0965108
CNAG_00264	21236.6	-1.84307	0.0931244	-19.7914	3.52883e-87	1.55343e-85
CNAG_00265	7894.62	0.560217	0.115369	4.85585	1.19872e-06	2.94981e-06
CNAG_00266	3734.87	0.119778	0.110041	1.08848	0.276382	0.33201
CNAG_00267	1573.23	-0.27484	0.125012	-2.1985	0.0279131	0.040722
CNAG_00268	20607.6	1.11288	0.106721	10.4279	1.84906e-25	1.63314e-24
CNAG_00269	310.907	-2.61769	0.403385	-6.48932	8.62258e-11	3.0219e-10
CNAG_00270	6537.34	-0.197403	0.106903	-1.84657	0.0648096	0.088628
CNAG_00271	3457.62	0.117411	0.0748087	1.56948	0.116535	0.151947
CNAG_00272	8843.32	-0.141843	0.0560134	-2.53231	0.0113314	0.0175008
CNAG_00273	1301.88	0.150994	0.11006	1.37192	0.170089	0.215002
CNAG_00274	6220.2	-0.768965	0.0656061	-11.7209	9.95618e-32	1.19878e-30
CNAG_00275	4266.5	0.210703	0.103626	2.03331	0.0420216	0.0594997
CNAG_00276	2371.09	-0.307515	0.105522	-2.91423	0.00356568	0.00588154
CNAG_00277	5192.23	-0.0272954	0.0953418	-0.28629	0.774656	0.812959
CNAG_00278	2353.29	0.631635	0.11327	5.57635	2.45622e-08	7.05412e-08
CNAG_00279	5883.11	-0.221104	0.0864407	-2.55787	0.0105317	0.0163263
CNAG_00280	6799.58	-0.236964	0.064897	-3.65138	0.000260834	0.000499456
CNAG_00283	5407.19	0.152713	0.0932445	1.63776	0.101471	0.133709
CNAG_00284	5057.34	0.0933151	0.0846573	1.10227	0.270345	0.325321
CNAG_00285	5746.15	-0.0952957	0.106152	-0.897731	0.369329	0.428088
CNAG_00286	6567.03	0.246013	0.0849256	2.89681	0.00376976	0.00620095
CNAG_00287	3450	-0.58084	0.0727562	-7.98337	1.4239e-15	7.01828e-15
CNAG_00288	3185.41	-0.225324	0.119067	-1.89241	0.0584365	0.0806155
CNAG_00289	1015.85	-0.0418976	0.14077	-0.297631	0.765985	0.805485
CNAG_00290	6391.87	-0.562832	0.0787011	-7.15151	8.583e-13	3.4988e-12
CNAG_00291	4648.01	-0.0186815	0.0806852	-0.231536	0.816898	0.850425
CNAG_00292	23112	1.18933	0.124239	9.57299	1.03859e-21	7.4428e-21
CNAG_00293	9832.99	0.121103	0.0848716	1.4269	0.15361	0.196017
CNAG_00294	5637.98	-0.335531	0.0774169	-4.33408	1.46374e-05	3.21667e-05
CNAG_00295	3.88562	-0.130512	1.68634	-0.077394	0.93831	0.953171
CNAG_00299	8253.18	0.705361	0.121257	5.81706	5.98921e-09	1.81531e-08
CNAG_00300	15112.7	0.202757	0.0837711	2.42037	0.0155046	0.0234543
CNAG_00301	35661.2	1.82651	0.074775	24.4268	8.88513e-132	8.90654e-130
CNAG_00302	16416.5	-0.915499	0.0984669	-9.29753	1.43748e-20	9.6528e-20
CNAG_00303	639.521	-1.27893	0.129943	-9.84223	7.40536e-23	5.64735e-22
CNAG_00304	1754.3	0.873732	0.131238	6.6576	2.78342e-11	1.01348e-10
CNAG_00305	5655.5	0.656303	0.0999265	6.56786	5.10427e-11	1.82108e-10
CNAG_00306	10982.7	-1.36495	0.0850937	-16.0405	6.65636e-58	1.74703e-56
CNAG_00307	3193.26	0.18973	0.176402	1.07555	0.282127	0.338374
CNAG_00308	1949.08	0.0403379	0.10789	0.373879	0.708494	0.753732
CNAG_00309	7398.56	0.340875	0.0702449	4.85266	1.21814e-06	2.99319e-06
CNAG_00310	2487.58	0.17148	0.0971514	1.76507	0.0775513	0.104569
CNAG_00311	5800.3	0.996606	0.0951736	10.4715	1.16826e-25	1.04628e-24
CNAG_00312	1662.7	0.258255	0.10124	2.55093	0.0107435	0.0166454
CNAG_00313	6204.65	-0.204905	0.078842	-2.59893	0.00935157	0.0145948
CNAG_00314	4219.61	0.111392	0.133403	0.835003	0.403716	0.463666
CNAG_00315	340.702	0.434227	0.30178	1.43888	0.150184	0.192235
CNAG_00316	4254.82	0.0803445	0.0843799	0.952176	0.341008	0.399942
CNAG_00317	3889.79	0.163466	0.0902996	1.81026	0.0702548	0.0955338
CNAG_00318	3505.34	-0.131485	0.0990037	-1.32808	0.18415	0.231091
CNAG_00319	9319.18	-0.0628755	0.0559957	-1.12286	0.261496	0.315677
CNAG_00320	1712.89	0.260076	0.10273	2.53165	0.0113527	0.0175306
CNAG_00321	1982.93	-0.229263	0.153096	-1.49751	0.13426	0.173238
CNAG_00322	1739.77	-0.795775	0.137402	-5.79159	6.97213e-09	2.10098e-08
CNAG_00323	171.48	-0.341348	0.217089	-1.57239	0.11586	0.151161
CNAG_00326	17368.5	0.220302	0.0663019	3.32271	0.000891482	0.00160059
CNAG_00327	2005.25	0.186182	0.105478	1.76513	0.0775419	0.104569
CNAG_00328	3973.85	-0.696567	0.0869433	-8.01173	1.13104e-15	5.62816e-15
CNAG_00329	2646.77	-0.598621	0.106176	-5.63802	1.72013e-08	5.01981e-08
CNAG_00330	11799.1	-0.203756	0.0952889	-2.13829	0.0324929	0.0468691
CNAG_00331	14955.2	-1.72399	0.0963604	-17.891	1.38536e-71	4.82268e-70
CNAG_00332	15893.8	-0.0387283	0.102868	-0.376486	0.706556	0.752117
CNAG_00333	5220.59	0.662089	0.0804033	8.23461	1.80151e-16	9.43268e-16
CNAG_00334	119197	0.342862	0.0966064	3.54906	0.000386609	0.00072462
CNAG_00335	2195.54	-0.0288195	0.127895	-0.225338	0.821717	0.854265
CNAG_00336	9460.89	-0.28345	0.0611974	-4.63174	3.62612e-06	8.49123e-06
CNAG_00337	12806	0.732174	0.106675	6.86362	6.71361e-12	2.57644e-11
CNAG_00342	4382.48	0.0862109	0.0761457	1.13218	0.257557	0.311458
CNAG_00343	4893.1	-0.131846	0.090716	-1.4534	0.146113	0.187544
CNAG_00344	5133.85	0.406514	0.10526	3.86198	0.00011247	0.000225103
CNAG_00345	5975.16	1.35846	0.0787271	17.2552	1.02196e-66	3.18453e-65
CNAG_00346	2698.69	0.390578	0.126901	3.07782	0.00208518	0.00356089
CNAG_00347	7842.66	0.665621	0.0650788	10.2279	1.48676e-24	1.25074e-23
CNAG_00348	2233.41	-0.787053	0.0865665	-9.09189	9.73279e-20	6.25304e-19
CNAG_00349	3081.28	0.975958	0.116694	8.36338	6.0947e-17	3.28206e-16
CNAG_00351	1964.91	1.00068	0.120679	8.29207	1.11295e-16	5.90923e-16
CNAG_00352	2383.57	-0.208139	0.0831823	-2.5022	0.0123423	0.0189564
CNAG_00353	2397.96	0.0695338	0.0857416	0.81097	0.417383	0.477731
CNAG_00354	19849.6	-0.136031	0.0523253	-2.59973	0.00932979	0.014569
CNAG_00355	10022.7	-0.163886	0.062159	-2.63656	0.00837515	0.0131747
CNAG_00356	7996.32	-0.0689361	0.0663905	-1.03834	0.299111	0.35638
CNAG_00357	2488.05	0.0619341	0.0775201	0.798942	0.424324	0.484742
CNAG_00358	6227.28	0.86146	0.106224	8.10987	5.06722e-16	2.58012e-15
CNAG_00359	6232.75	0.199961	0.0993136	2.01343	0.0440694	0.0620822
CNAG_00360	1705.29	0.213432	0.137346	1.55397	0.12019	0.156321
CNAG_00361	8343	-0.163153	0.0663049	-2.46065	0.0138686	0.0211177
CNAG_00362	7453.58	-0.864097	0.0826687	-10.4525	1.42671e-25	1.26955e-24
CNAG_00363	25036.7	0.141889	0.12531	1.1323	0.257507	0.311449
CNAG_00364	5214.82	0.578448	0.0736883	7.84993	4.16272e-15	1.99045e-14
CNAG_00365	3592.76	-0.147218	0.0859536	-1.71277	0.0867556	0.116034
CNAG_00366	747.619	-0.621652	0.124862	-4.9787	6.40119e-07	1.61977e-06
CNAG_00367	3410.13	-0.195761	0.0803424	-2.43659	0.0148266	0.0224899
CNAG_00368	4315.25	-0.552215	0.0614816	-8.98179	2.66407e-19	1.66905e-18
CNAG_00369	5462.01	-0.187989	0.0806699	-2.33034	0.019788	0.0294782
CNAG_00370	33569.3	0.0763607	0.0663888	1.1502	0.25006	0.303678
CNAG_00371	1622.65	-1.2905	0.102844	-12.5481	4.07071e-36	5.75013e-35
CNAG_00372	15932.7	-0.394153	0.0942081	-4.18386	2.86602e-05	6.08143e-05
CNAG_00373	3401.78	-1.19835	0.120183	-9.97102	2.04125e-23	1.61284e-22
CNAG_00374	9923.7	-0.931371	0.107118	-8.69485	3.47302e-18	2.02492e-17
CNAG_00375	7651.3	0.488737	0.0921655	5.30281	1.14032e-07	3.07335e-07
CNAG_00376	261.985	0.129422	0.235984	0.548435	0.583393	0.638326
CNAG_00377	30726.9	0.399239	0.124775	3.19966	0.0013759	0.00240696
CNAG_00378	4295.96	0.385386	0.0872991	4.41455	1.01222e-05	2.26632e-05
CNAG_00383	12987.8	-0.0921781	0.0719717	-1.28075	0.20028	0.249041
CNAG_00384	4121.05	0.395048	0.104267	3.7888	0.000151376	0.00029873
CNAG_00385	5622.41	-0.251778	0.0830948	-3.03001	0.00244545	0.0041312
CNAG_00386	17403.9	1.04029	0.103347	10.066	7.80698e-24	6.30011e-23
CNAG_00387	2279.84	0.501965	0.0740683	6.77706	1.22648e-11	4.58004e-11
CNAG_00388	5899.94	0.280184	0.0858849	3.26232	0.00110503	0.00195679
CNAG_00389	6327.05	-0.844884	0.073635	-11.4739	1.78335e-30	2.01871e-29
CNAG_00390	6296.33	-0.0420233	0.0615416	-0.682843	0.494706	0.554337
CNAG_00391	1192.9	1.49801	0.150959	9.92327	3.29787e-23	2.56432e-22
CNAG_00392	1742.77	0.566138	0.102401	5.52862	3.22755e-08	9.18373e-08
CNAG_00393	6004.1	0.627447	0.122572	5.11899	3.07168e-07	7.98139e-07
CNAG_00394	3930.04	1.93647	0.172314	11.238	2.65315e-29	2.84461e-28
CNAG_00395	13271.2	-1.03357	0.066851	-15.4608	6.38229e-54	1.49579e-52
CNAG_00396	3266.18	-0.474968	0.127818	-3.71597	0.000202426	0.000393318
CNAG_00397	1224.38	-0.687342	0.111033	-6.19044	5.99953e-10	1.97844e-09
CNAG_00398	5718.66	-0.36702	0.0644736	-5.69256	1.25147e-08	3.6936e-08
CNAG_00399	12860.1	1.7604	0.100937	17.4406	4.06025e-68	1.3043e-66
CNAG_00400	3473.6	0.147335	0.159004	0.926612	0.354128	0.413144
CNAG_00401	6309.22	0.122697	0.0820783	1.49488	0.134946	0.174035
CNAG_00402	14087.8	0.166064	0.0890135	1.8656	0.0620974	0.0851856
CNAG_00403	1389.26	-0.608858	0.121365	-5.01675	5.25517e-07	1.33669e-06
CNAG_00404	1946.53	-1.01737	0.128528	-7.91554	2.46182e-15	1.19084e-14
CNAG_00405	5940.79	-0.30673	0.0718367	-4.26982	1.95627e-05	4.23528e-05
CNAG_00406	2065.68	-0.374314	0.141535	-2.64467	0.008177	0.0128777
CNAG_00407	182052	2.06423	0.0731842	28.2059	4.94455e-175	9.14192e-173
CNAG_00408	6022.69	-0.3929	0.0919913	-4.27106	1.94545e-05	4.21403e-05
CNAG_00409	3139.46	0.706114	0.130144	5.42564	5.77487e-08	1.6037e-07
CNAG_00410	7956.92	0.327854	0.0906913	3.61505	0.00030029	0.000570806
CNAG_00411	4462.27	-0.275969	0.0733772	-3.76097	0.000169259	0.00033213
CNAG_00412	647.629	-0.291853	0.135195	-2.15876	0.030869	0.0446428
CNAG_00413	7086.84	-0.18963	0.0946583	-2.00331	0.0451438	0.0634346
CNAG_00414	1156.64	-0.971439	0.113029	-8.59456	8.35837e-18	4.78278e-17
CNAG_00415	3443.2	-0.132982	0.0771858	-1.72288	0.0849095	0.113796
CNAG_00416	3107.5	0.0337892	0.115569	0.292372	0.770003	0.809198
CNAG_00417	34200.5	0.224681	0.0800194	2.80784	0.00498757	0.00806856
CNAG_00418	43505.5	0.673818	0.109712	6.14171	8.16394e-10	2.65328e-09
CNAG_00419	2370.72	0.524948	0.0996497	5.26793	1.3797e-07	3.69376e-07
CNAG_00420	1586.66	-0.321969	0.0919056	-3.50326	0.000459601	0.000852974
CNAG_00421	1907.62	-0.827524	0.121089	-6.834	8.25788e-12	3.13152e-11
CNAG_00422	4717.62	0.297113	0.0840464	3.5351	0.000407619	0.000761256
CNAG_00423	3795.92	-0.319194	0.131935	-2.41932	0.0155494	0.0235178
CNAG_00424	4789.27	-0.525764	0.141944	-3.70403	0.000212201	0.000411254
CNAG_00425	271.794	0.494788	0.299911	1.64978	0.0989873	0.130892
CNAG_00426	5508.04	-0.0628019	0.104975	-0.598255	0.54967	0.607521
CNAG_00427	7232.81	0.250528	0.0786565	3.18508	0.00144712	0.00252252
CNAG_00428	5190.07	0.382202	0.0771997	4.95082	7.39014e-07	1.85366e-06
CNAG_00429	2849.96	2.7441	0.302627	9.06758	1.21688e-19	7.77011e-19
CNAG_00430	1346.86	1.53895	0.175056	8.79116	1.48025e-18	8.85382e-18
CNAG_00433	10893.1	-1.54066	0.155746	-9.89217	4.50147e-23	3.47102e-22
CNAG_00434	3439.92	0.417434	0.0933356	4.4724	7.73456e-06	1.75297e-05
CNAG_00435	1828.81	0.387529	0.106101	3.65245	0.000259747	0.000497489
CNAG_00436	7619.52	-0.462486	0.0740686	-6.24402	4.26465e-10	1.42212e-09
CNAG_00437	1408.42	-0.751504	0.151671	-4.95484	7.23906e-07	1.81796e-06
CNAG_00438	1689.1	-0.145376	0.11649	-1.24797	0.212042	0.262294
CNAG_00439	7392.16	0.0981807	0.0704223	1.39417	0.163266	0.207195
CNAG_00440	1064.72	-0.0709853	0.137908	-0.51473	0.606742	0.659536
CNAG_00441	56975.4	0.425061	0.100587	4.2258	2.38091e-05	5.11337e-05
CNAG_00442	19925.9	-2.09368	0.113628	-18.4257	8.16745e-76	3.00678e-74
CNAG_00443	1606.64	-0.75669	0.114238	-6.6238	3.50087e-11	1.2642e-10
CNAG_00444	1493.86	0.384125	0.148253	2.59101	0.00956937	0.0149124
CNAG_00445	13106.6	-1.2682	0.108596	-11.6781	1.64886e-31	1.95699e-30
CNAG_00446	100.693	0.452053	0.314836	1.43584	0.151048	0.193223
CNAG_00447	8262.79	0.789701	0.0917727	8.60497	7.63376e-18	4.37416e-17
CNAG_00448	5136.43	-0.202462	0.0831611	-2.43458	0.0149091	0.0226068
CNAG_00449	13805.7	1.02045	0.11457	8.90683	5.25146e-19	3.24607e-18
CNAG_00450	5732.95	0.452863	0.154309	2.93478	0.00333783	0.00551992
CNAG_00451	1478.72	1.43197	0.125392	11.4199	3.32429e-30	3.7125e-29
CNAG_00452	739.147	-0.607456	0.15196	-3.99748	6.40193e-05	0.00013087
CNAG_00453	4879.01	-1.57048	0.259032	-6.06286	1.33718e-09	4.26913e-09
CNAG_00454	820.223	-1.24811	0.211051	-5.9138	3.34305e-09	1.03552e-08
CNAG_00455	20277.2	0.417554	0.0937948	4.45178	8.51612e-06	1.92069e-05
CNAG_00456	170528	-2.23723	0.0849893	-26.3237	1.02679e-152	1.25631e-150
CNAG_00457	53748.9	-0.0984741	0.0492032	-2.00138	0.0453518	0.0636947
CNAG_00458	11772.9	0.0645549	0.0673417	0.958617	0.337752	0.396626
CNAG_00460	1020.59	-0.349869	0.226253	-1.54636	0.122017	0.158573
CNAG_00461	8973.3	-0.270948	0.0787759	-3.43948	0.000582842	0.00107118
CNAG_00462	2376.78	-0.279266	0.134483	-2.07659	0.0378395	0.0541308
CNAG_00463	29.9434	-0.570329	0.401476	-1.42058	0.155439	0.198139
CNAG_00464	13124.3	0.0581438	0.0526808	1.1037	0.269723	0.32462
CNAG_00465	10744.6	-0.299654	0.115363	-2.59749	0.00939089	0.0146507
CNAG_00466	2198.23	-0.577521	0.156301	-3.69494	0.00021994	0.000425162
CNAG_00467	1766.82	-0.691806	0.122041	-5.66862	1.43955e-08	4.22174e-08
CNAG_00468	6856.63	-0.435812	0.0825061	-5.28217	1.27661e-07	3.42846e-07
CNAG_00469	3678.93	-0.571921	0.0945311	-6.05008	1.44773e-09	4.61322e-09
CNAG_00470	1221.82	0.140382	0.178424	0.786789	0.431405	0.491684
CNAG_00471	2340.77	0.00646209	0.0883099	0.0731752	0.941667	0.955564
CNAG_00472	2186.89	0.161421	0.12243	1.31848	0.187345	0.234639
CNAG_00473	2332.57	-0.446177	0.115279	-3.8704	0.000108659	0.000217579
CNAG_00474	4092.95	1.0348	0.106442	9.7217	2.43685e-22	1.80861e-21
CNAG_00475	4502.35	-0.76826	0.143151	-5.3668	8.01464e-08	2.19132e-07
CNAG_00476	1096.99	-2.17837	0.185959	-11.7142	1.07754e-31	1.29181e-30
CNAG_00480	20977.5	-1.09173	0.0995947	-10.9617	5.83689e-28	5.95134e-27
CNAG_00481	9.82382	-1.23595	0.750462	-1.64692	0.0995738	0.131542
CNAG_00482	5071.89	-0.45488	0.0943129	-4.82309	1.41348e-06	3.45075e-06
CNAG_00483	66362.6	-0.160023	0.0420072	-3.80942	0.000139291	0.000275994
CNAG_00484	6426.48	-0.460338	0.138304	-3.32844	0.000873336	0.00157004
CNAG_00485	12814.4	-1.22786	0.150041	-8.1835	2.75714e-16	1.43103e-15
CNAG_00486	2637.06	-1.19248	0.115735	-10.3036	6.78747e-25	5.79792e-24
CNAG_00487	2272.87	-1.2712	0.120234	-10.5727	3.98905e-26	3.70412e-25
CNAG_00488	4499.07	-0.445492	0.128206	-3.47481	0.000511212	0.000944964
CNAG_00490	3693.51	-1.35572	0.086805	-15.618	5.48768e-55	1.31578e-53
CNAG_00491	3564.03	-0.188892	0.0844785	-2.23598	0.0253529	0.0372153
CNAG_00492	1537.75	-0.441511	0.125728	-3.51163	0.000445362	0.000829136
CNAG_00493	5287.32	-0.224588	0.0848253	-2.64766	0.00810512	0.0127765
CNAG_00495	3709.84	0.547791	0.0850698	6.43931	1.20018e-10	4.15545e-10
CNAG_00496	1493.4	0.100755	0.152077	0.662527	0.507633	0.566686
CNAG_00497	12510.4	-0.273606	0.0929933	-2.94221	0.00325876	0.00539452
CNAG_00498	4912.43	-0.834998	0.101318	-8.24139	1.70224e-16	8.94105e-16
CNAG_00499	2187.47	-0.870766	0.121921	-7.14208	9.19293e-13	3.74194e-12
CNAG_00500	9699.35	0.102716	0.0855282	1.20096	0.229768	0.281418
CNAG_00501	1393.95	0.456379	0.10405	4.38616	1.1537e-05	2.56926e-05
CNAG_00502	2000.01	0.0762209	0.119879	0.635817	0.524896	0.583451
CNAG_00503	8649.84	-1.68919	0.0745054	-22.6721	8.45488e-114	6.17058e-112
CNAG_00504	2984.54	-1.51365	0.0683487	-22.146	1.14079e-108	7.41512e-107
CNAG_00505	3214.16	-0.729108	0.144949	-5.03009	4.90239e-07	1.2504e-06
CNAG_00506	3846.69	0.00898006	0.108384	0.0828539	0.933968	0.94972
CNAG_00507	622.859	-0.812426	0.154126	-5.27118	1.35546e-07	3.63319e-07
CNAG_00508	3726.81	-0.774688	0.109824	-7.05392	1.73948e-12	6.95456e-12
CNAG_00509	15784.6	0.320528	0.0934761	3.42898	0.000605854	0.00111127
CNAG_00510	837.057	0.0719992	0.122477	0.587859	0.556627	0.613477
CNAG_00511	1045.9	0.495554	0.124899	3.96763	7.25909e-05	0.000147667
CNAG_00512	5584.13	0.629648	0.0884115	7.12178	1.06539e-12	4.31969e-12
CNAG_00513	15555.7	1.38975	0.127782	10.8759	1.50112e-27	1.50837e-26
CNAG_00514	3907.54	0.000978099	0.0796719	0.0122766	0.990205	0.993668
CNAG_00515	1799.07	-0.492856	0.0990717	-4.97474	6.53337e-07	1.65171e-06
CNAG_00516	537.448	-0.103619	0.183835	-0.563653	0.57299	0.628835
CNAG_00517	10408.1	-0.116595	0.0928626	-1.25556	0.209276	0.259181
CNAG_00519	14419.2	0.478972	0.0698847	6.85374	7.19419e-12	2.75072e-11
CNAG_00520	16310.1	0.765414	0.104738	7.3079	2.71344e-13	1.14831e-12
CNAG_00521	5803.2	-0.27256	0.111233	-2.45035	0.0142717	0.0216838
CNAG_00522	16234	0.0180802	0.125801	0.143721	0.885721	0.909441
CNAG_00523	2383.89	0.146198	0.0833659	1.7537	0.0794824	0.106971
CNAG_00524	4482.06	-0.587977	0.0882186	-6.665	2.64662e-11	9.64515e-11
CNAG_00525	12003.6	-0.0305634	0.0722532	-0.423004	0.672292	0.72118
CNAG_00526	854.947	-1.52392	0.157185	-9.69508	3.16398e-22	2.33165e-21
CNAG_00527	7484.96	0.588175	0.115852	5.07697	3.83502e-07	9.88457e-07
CNAG_00528	5044.97	-0.110166	0.0765279	-1.43955	0.149996	0.192024
CNAG_00529	12239.6	0.705452	0.0950058	7.42536	1.12473e-13	4.9019e-13
CNAG_00531	58009.6	-2.91808	0.099161	-29.4277	2.43031e-190	5.05504e-188
CNAG_00532	5137.12	0.256229	0.101389	2.5272	0.0114975	0.0177377
CNAG_00533	4581.07	0.856403	0.0982129	8.71987	2.78523e-18	1.63536e-17
CNAG_00534	7055.63	0.25642	0.155142	1.65281	0.0983695	0.130262
CNAG_00535	5193.02	0.410882	0.0792644	5.18369	2.17543e-07	5.73134e-07
CNAG_00536	4159.92	-0.353462	0.167549	-2.1096	0.0348929	0.0501484
CNAG_00537	3493.78	-1.36353	0.110432	-12.3473	5.03857e-35	6.91763e-34
CNAG_00538	3251.85	0.807712	0.138289	5.84074	5.19685e-09	1.5838e-08
CNAG_00539	4155.56	0.284178	0.0972588	2.92187	0.00347932	0.00574592
CNAG_00540	577.066	0.519101	0.158712	3.2707	0.00107281	0.00190478
CNAG_00541	1622.56	0.60238	0.118577	5.08007	3.77292e-07	9.73054e-07
CNAG_00542	4001.29	-0.970173	0.0645175	-15.0374	4.17898e-51	9.0781e-50
CNAG_00543	6730.81	-0.922864	0.0569441	-16.2065	4.53761e-59	1.22974e-57
CNAG_00544	3333.72	0.537309	0.111822	4.80504	1.54718e-06	3.77051e-06
CNAG_00545	7377.57	0.141243	0.0754414	1.87222	0.0611759	0.08406
CNAG_00546	20518.7	-0.0653179	0.0721199	-0.905684	0.365103	0.423721
CNAG_00547	22204	0.00223166	0.0864748	0.0258071	0.979411	0.984856
CNAG_00549	1924.39	-0.135879	0.10605	-1.28128	0.200096	0.248886
CNAG_00550	5426.49	0.2367	0.113799	2.07998	0.0375273	0.0537166
CNAG_00551	14235.2	0.151989	0.0704568	2.15719	0.0309911	0.044796
CNAG_00554	4260.24	-0.460929	0.112692	-4.09017	4.31059e-05	8.98174e-05
CNAG_00555	6547.7	-0.723958	0.0830488	-8.71725	2.8503e-18	1.67239e-17
CNAG_00556	10784.9	-0.528422	0.0724019	-7.29846	2.9108e-13	1.22746e-12
CNAG_00557	6283.66	0.367506	0.0810287	4.5355	5.74672e-06	1.31824e-05
CNAG_00558	12060.7	0.915946	0.0679661	13.4765	2.15068e-41	3.65176e-40
CNAG_00559	10094.7	2.82313	0.101846	27.7197	4.04696e-169	6.47513e-167
CNAG_00560	8139.6	-0.152412	0.06415	-2.37587	0.0175077	0.0262467
CNAG_00561	5144.34	0.364296	0.0737333	4.94073	7.78322e-07	1.94873e-06
CNAG_00562	3223.05	0.451782	0.0740984	6.09705	1.08043e-09	3.48013e-09
CNAG_00563	2732.64	-1.10519	0.159641	-6.92298	4.42245e-12	1.7226e-11
CNAG_00564	7003.15	0.740244	0.0805478	9.19011	3.92426e-20	2.57085e-19
CNAG_00565	19290.1	-0.536119	0.0647429	-8.28074	1.22416e-16	6.4914e-16
CNAG_00566	3114.38	-0.926712	0.154046	-6.01582	1.78982e-09	5.66799e-09
CNAG_00567	4846.74	0.641619	0.0714017	8.98605	2.56273e-19	1.60799e-18
CNAG_00568	1184.3	0.236032	0.119109	1.98165	0.0475189	0.0664131
CNAG_00569	4549.51	0.454082	0.0886474	5.12233	3.01777e-07	7.84376e-07
CNAG_00570	8270.35	-0.0905104	0.081057	-1.11663	0.264154	0.318609
CNAG_00571	10986.4	-0.226109	0.0608866	-3.7136	0.00020433	0.000396832
CNAG_00572	10340.6	-0.371936	0.064391	-5.77622	7.63994e-09	2.29226e-08
CNAG_00573	1734.03	-0.753055	0.0985549	-7.64097	2.15593e-14	9.90465e-14
CNAG_00574	6752.27	0.351143	0.0646177	5.43416	5.50556e-08	1.53147e-07
CNAG_00575	9713.12	-0.757791	0.184595	-4.10516	4.04037e-05	8.44196e-05
CNAG_00576	8175.37	1.03988	0.0523209	19.875	6.69791e-88	2.99605e-86
CNAG_00577	3127.17	0.469339	0.102439	4.58164	4.61349e-06	1.06801e-05
CNAG_00580	15309.4	1.17648	0.0902582	13.0346	7.77303e-39	1.20431e-37
CNAG_00581	54780.5	-0.547381	0.0599969	-9.1235	7.27353e-20	4.70208e-19
CNAG_00582	9603.45	0.577676	0.0857123	6.73971	1.58705e-11	5.86595e-11
CNAG_00583	23356.1	0.173113	0.079217	2.1853	0.028867	0.0420251
CNAG_00584	34668.5	0.165508	0.0584935	2.82951	0.00466196	0.00757421
CNAG_00585	5489.85	1.30865	0.131434	9.9567	2.35748e-23	1.85215e-22
CNAG_00586	33135.3	3.03808	0.129639	23.4348	1.88727e-121	1.55466e-119
CNAG_00587	8162.22	1.15189	0.14002	8.22662	1.92563e-16	1.00573e-15
CNAG_00588	85908.4	4.35588	0.154299	28.2302	2.49145e-175	4.71111e-173
CNAG_00589	2778.1	0.498736	0.081912	6.08868	1.13848e-09	3.6586e-09
CNAG_00590	5344.84	1.03292	0.110086	9.38285	6.42128e-21	4.39351e-20
CNAG_00591	1539.6	-0.884951	0.1755	-5.04244	4.59629e-07	1.1752e-06
CNAG_00592	2226.49	-0.200928	0.0933682	-2.152	0.0313972	0.0453673
CNAG_00593	5338.29	0.249106	0.0800367	3.1124	0.00185573	0.00319529
CNAG_00594	20054.8	0.222396	0.0802366	2.77176	0.00557549	0.00896041
CNAG_00595	2917.63	-0.28616	0.138333	-2.06864	0.03858	0.0550387
CNAG_00596	2543.55	-0.401515	0.107282	-3.7426	0.000182124	0.000356116
CNAG_00597	41159.3	-1.69314	0.0823461	-20.5613	6.09428e-94	3.07299e-92
CNAG_00598	1690.78	-0.481596	0.145469	-3.31063	0.000930849	0.00166337
CNAG_00599	7346.93	0.205745	0.0885854	2.32256	0.0202029	0.0300641
CNAG_00600	13255.9	0.0904676	0.0840727	1.07606	0.281899	0.338197
CNAG_00601	10591.6	-4.31617	0.0875129	-49.3204	0	0
CNAG_00602	16412.1	0.309343	0.0777857	3.97687	6.9829e-05	0.000142222
CNAG_00603	8068.33	1.43732	0.114267	12.5786	2.76838e-36	3.91716e-35
CNAG_00604	6007.19	0.881308	0.0877149	10.0474	9.43124e-24	7.58144e-23
CNAG_00605	4759.97	0.605666	0.106087	5.70915	1.13539e-08	3.36412e-08
CNAG_00606	4705.41	-0.381177	0.0708467	-5.38031	7.43596e-08	2.03913e-07
CNAG_00607	9347.64	1.22656	0.114911	10.6739	1.34804e-26	1.29512e-25
CNAG_00608	2262.83	0.244497	0.100407	2.43505	0.0148899	0.0225818
CNAG_00609	12316.6	1.06144	0.111344	9.53297	1.52851e-21	1.08601e-20
CNAG_00612	2975.4	0.289973	0.101248	2.86399	0.00418347	0.00684358
CNAG_00613	7124.28	0.794127	0.108829	7.29701	2.94231e-13	1.24012e-12
CNAG_00614	1446.11	-0.325721	0.21918	-1.48609	0.137255	0.17672
CNAG_00615	3124.92	-0.0568596	0.141506	-0.401818	0.687818	0.735464
CNAG_00619	2641.82	0.297648	0.10776	2.76214	0.00574243	0.00921624
CNAG_00622	5064.28	0.448673	0.0942227	4.76183	1.91842e-06	4.63451e-06
CNAG_00623	4231.85	0.33796	0.0569029	5.93924	2.86354e-09	8.91643e-09
CNAG_00624	4274.17	-0.0675874	0.0638711	-1.05818	0.289971	0.346732
CNAG_00625	12071.1	0.0291377	0.0936034	0.311289	0.755581	0.796154
CNAG_00626	13357.6	0.652859	0.0860382	7.58801	3.24848e-14	1.47449e-13
CNAG_00627	3087.68	-0.461793	0.106454	-4.33798	1.438e-05	3.16344e-05
CNAG_00628	3875.4	-0.152512	0.0814743	-1.87191	0.0612192	0.0841056
CNAG_00632	6693.61	-0.403441	0.05984	-6.74199	1.56228e-11	5.77953e-11
CNAG_00633	17150.7	0.824094	0.111557	7.38719	1.4997e-13	6.44143e-13
CNAG_00634	10607.3	-0.0870007	0.0831178	-1.04672	0.295231	0.352312
CNAG_00635	15444.2	0.355073	0.0691308	5.13626	2.80267e-07	7.32356e-07
CNAG_00636	5265.54	0.136112	0.0595786	2.28457	0.0223381	0.032976
CNAG_00637	5728.83	-2.06307	0.137085	-15.0496	3.47452e-51	7.56754e-50
CNAG_00638	6937.85	-2.39931	0.247824	-9.68151	3.61323e-22	2.64864e-21
CNAG_00639	2345.82	-0.927464	0.120825	-7.6761	1.64003e-14	7.5764e-14
CNAG_00640	77831.7	0.432729	0.0797657	5.425	5.79536e-08	1.60885e-07
CNAG_00641	9419.03	0.476736	0.0895849	5.32161	1.02852e-07	2.78648e-07
CNAG_00642	8306.6	0.0775343	0.0678537	1.14267	0.253176	0.306959
CNAG_00643	9980.64	1.488	0.135521	10.9798	4.77744e-28	4.87709e-27
CNAG_00644	8185.3	-0.568013	0.071949	-7.89465	2.9113e-15	1.40012e-14
CNAG_00645	5627.79	-0.312863	0.0708273	-4.41727	9.99574e-06	2.24042e-05
CNAG_00647	9436.86	-0.134979	0.0878946	-1.53569	0.124614	0.161745
CNAG_00648	7055.69	-0.818911	0.107964	-7.58503	3.32421e-14	1.50722e-13
CNAG_00649	10322.5	0.376947	0.104671	3.60126	0.000316675	0.00060003
CNAG_00650	4441.55	0.122238	0.0910389	1.3427	0.179369	0.225499
CNAG_00651	2906.92	-0.36255	0.113286	-3.20031	0.0013728	0.00240356
CNAG_00652	15032.6	-0.16085	0.0574661	-2.79904	0.00512543	0.00827067
CNAG_00653	11356.3	-0.0257785	0.0686574	-0.375465	0.707315	0.752828
CNAG_00654	8613.95	-0.130591	0.0940874	-1.38797	0.165145	0.209293
CNAG_00655	46513.6	0.54138	0.0749937	7.219	5.23708e-13	2.16348e-12
CNAG_00656	69818.8	0.265504	0.0906647	2.92842	0.00340692	0.00563083
CNAG_00657	0.275529	-1.05716	5.23154	-0.202074	0.839859	0.870082
CNAG_00658	3091.86	-0.432481	0.075498	-5.72837	1.01398e-08	3.01512e-08
CNAG_00659	2309.91	0.0782991	0.107577	0.727845	0.466708	0.526582
CNAG_00660	5700.85	-0.0645448	0.0833366	-0.774507	0.438631	0.498826
CNAG_00661	4825.08	-0.382324	0.0752549	-5.08039	3.76667e-07	9.71742e-07
CNAG_00662	4144.21	-0.495303	0.0531237	-9.32358	1.12482e-20	7.60238e-20
CNAG_00663	7352.52	-1.05022	0.120481	-8.71692	2.85861e-18	1.67491e-17
CNAG_00664	1222.39	-0.731959	0.181642	-4.02968	5.58524e-05	0.000114881
CNAG_00665	7207.31	0.0534319	0.0800993	0.667071	0.504727	0.564047
CNAG_00666	12434.6	0.724887	0.103767	6.98572	2.83409e-12	1.1133e-11
CNAG_00667	3486.09	-0.119545	0.105595	-1.13211	0.257589	0.311458
CNAG_00668	49972.4	0.125534	0.0731363	1.71644	0.086082	0.115219
CNAG_00669	3965.28	0.94399	0.130787	7.21774	5.28584e-13	2.18146e-12
CNAG_00670	3086.97	0.0572661	0.082785	0.691745	0.489097	0.548866
CNAG_00671	6189.11	0.0348588	0.075841	0.459631	0.645781	0.696694
CNAG_00672	40137.3	0.535969	0.0792687	6.76142	1.36644e-11	5.08214e-11
CNAG_00673	4126.8	0.46053	0.0813552	5.66074	1.50722e-08	4.41707e-08
CNAG_00674	24005.5	-0.688267	0.0967825	-7.11149	1.148e-12	4.64108e-12
CNAG_00675	12927.2	-0.335488	0.0761579	-4.40516	1.05705e-05	2.36225e-05
CNAG_00676	3398.01	0.368182	0.158817	2.31829	0.0204337	0.0303695
CNAG_00677	2974.46	-0.171189	0.0799487	-2.14123	0.0322554	0.0465588
CNAG_00678	9809.31	0.233784	0.0781933	2.98982	0.00279142	0.00467202
CNAG_00679	6589.94	-1.27295	0.0895592	-14.2136	7.54988e-46	1.44402e-44
CNAG_00680	10967.5	-1.244	0.108009	-11.5175	1.07678e-30	1.22892e-29
CNAG_00681	8365.62	0.0474467	0.0962165	0.493124	0.621925	0.674218
CNAG_00682	28335.1	-1.4933	0.0647574	-23.06	1.16821e-117	9.16932e-116
CNAG_00683	5753.52	0.438751	0.0983966	4.45901	8.23389e-06	1.86208e-05
CNAG_00684	5336.62	0.231605	0.0759978	3.04752	0.00230737	0.00391144
CNAG_00685	4872.62	-0.188766	0.0790882	-2.38678	0.0169968	0.0255443
CNAG_00686	38664.4	-0.194955	0.0993699	-1.96191	0.0497727	0.0693882
CNAG_00687	6306.55	0.387406	0.121071	3.19982	0.00137512	0.0024061
CNAG_00688	5089.73	-1.13765	0.102676	-11.08	1.56867e-28	1.64167e-27
CNAG_00689	2340.08	-0.755486	0.106529	-7.09183	1.32351e-12	5.32992e-12
CNAG_00690	5205.33	0.133298	0.0670436	1.98823	0.046786	0.0655429
CNAG_00691	6618.33	-1.42392	0.0901658	-15.7922	3.52173e-56	8.6946e-55
CNAG_00692	7269.56	-0.458855	0.0932453	-4.92094	8.61274e-07	2.14738e-06
CNAG_00693	5456.74	0.372202	0.0829003	4.48975	7.13067e-06	1.62096e-05
CNAG_00694	11527.4	0.18427	0.0741874	2.48384	0.0129974	0.0199004
CNAG_00695	3532.79	0.164898	0.0877618	1.87893	0.0602541	0.0829304
CNAG_00696	9697.08	-0.335542	0.0955463	-3.51182	0.00044505	0.000828742
CNAG_00697	13393.2	-1.86148	0.0919367	-20.2474	3.74551e-91	1.81178e-89
CNAG_00698	9119	-0.512338	0.0886867	-5.77695	7.60687e-09	2.28398e-08
CNAG_00699	61453.7	-4.54474	0.123115	-36.9147	2.68484e-298	1.48919e-295
CNAG_00700	17369.5	0.260638	0.0991527	2.62866	0.00857231	0.0134569
CNAG_00701	8326.8	0.961242	0.0899085	10.6913	1.11756e-26	1.07867e-25
CNAG_00702	22241.4	-0.238031	0.0859747	-2.76861	0.00562958	0.0090421
CNAG_00703	29905.7	0.423262	0.0752851	5.62211	1.88634e-08	5.48562e-08
CNAG_00704	7224.85	-0.0467968	0.0788496	-0.593495	0.55285	0.610365
CNAG_00705	6180.46	0.6154	0.0977128	6.29806	3.01402e-10	1.01484e-09
CNAG_00706	6004.85	0.916939	0.100263	9.14536	5.94341e-20	3.85418e-19
CNAG_00707	10030.7	0.50723	0.107906	4.70066	2.5932e-06	6.17499e-06
CNAG_00708	3834.02	0.218567	0.0940037	2.32509	0.0200671	0.0298781
CNAG_00709	2779.04	-0.0271675	0.0751038	-0.361733	0.717552	0.76158
CNAG_00710	2362.59	-0.11528	0.102497	-1.12472	0.260708	0.314909
CNAG_00711	6364.71	0.505615	0.110297	4.58411	4.55923e-06	1.0574e-05
CNAG_00712	3311.26	0.0169174	0.0805448	0.210037	0.833639	0.865038
CNAG_00713	4108.56	0.43126	0.0941043	4.58279	4.58811e-06	1.06361e-05
CNAG_00714	1366.62	0.261761	0.131661	1.98814	0.0467964	0.0655465
CNAG_00715	1205.97	-0.467921	0.225447	-2.07553	0.0379376	0.0542246
CNAG_00716	12680.3	-1.22122	0.156332	-7.81173	5.64089e-15	2.67878e-14
CNAG_00717	5975.38	-0.692323	0.13033	-5.31208	1.08378e-07	2.92477e-07
CNAG_00718	4345.94	0.252957	0.0937328	2.6987	0.00696102	0.0110668
CNAG_00719	14272.1	0.63489	0.114259	5.5566	2.75074e-08	7.86737e-08
CNAG_00720	9775.9	-0.00167943	0.106577	-0.0157579	0.987428	0.99124
CNAG_00721	19228.5	0.0710317	0.0574537	1.23633	0.216336	0.26698
CNAG_00722	2801.19	0.831033	0.0862225	9.63825	5.51208e-22	4.00529e-21
CNAG_00723	783.95	-0.380494	0.14314	-2.6582	0.00785586	0.0124166
CNAG_00726	49.6585	-0.281139	0.447534	-0.628197	0.529875	0.588593
CNAG_00727	1923.87	-0.762767	0.115501	-6.604	4.00206e-11	1.43894e-10
CNAG_00728	7652.25	0.579648	0.118593	4.88769	1.02024e-06	2.52855e-06
CNAG_00729	0	NA	NA	NA	NA	NA
CNAG_00730	16751.4	0.0141667	0.116901	0.121186	0.903544	0.92466
CNAG_00732	21244.5	-0.748796	0.145823	-5.13495	2.82221e-07	7.3723e-07
CNAG_00733	7140.62	0.931353	0.0912444	10.2072	1.84028e-24	1.53727e-23
CNAG_00734	5047.81	0.652004	0.1285	5.07398	3.89579e-07	1.0035e-06
CNAG_00735	9248.45	0.149367	0.124059	1.204	0.228589	0.280221
CNAG_00736	5443.41	-0.112568	0.0888137	-1.26746	0.204992	0.254253
CNAG_00737	4281.82	0.790998	0.0819284	9.65475	4.69322e-22	3.41624e-21
CNAG_00738	295.388	-0.586071	0.181504	-3.22897	0.00124237	0.00218486
CNAG_00739	5141.04	0.685608	0.0826996	8.29034	1.12927e-16	5.99206e-16
CNAG_00740	6901.09	0.007231	0.111756	0.0647033	0.94841	0.960982
CNAG_00741	17196.8	0.125343	0.0741128	1.69124	0.090791	0.120977
CNAG_00742	5815.15	0.298426	0.105982	2.81582	0.00486526	0.00787773
CNAG_00743	4489.17	1.29226	0.119285	10.8334	2.39231e-27	2.39519e-26
CNAG_00744	16167.5	1.03745	0.0801368	12.946	2.47655e-38	3.78767e-37
CNAG_00745	7160.05	-0.0611306	0.123986	-0.493043	0.621982	0.674218
CNAG_00746	24932.5	-0.115874	0.0687484	-1.68548	0.0918963	0.122313
CNAG_00747	22620.9	-1.03588	0.0804427	-12.8773	6.04438e-38	9.11037e-37
CNAG_00748	1596.37	-0.165513	0.129118	-1.28188	0.199885	0.248698
CNAG_00749	557.301	2.69199	0.259841	10.3601	3.76481e-25	3.26284e-24
CNAG_00750	2450.5	-0.0878832	0.115673	-0.759756	0.447401	0.50755
CNAG_00751	625.729	-1.10477	0.149134	-7.40792	1.28293e-13	5.56808e-13
CNAG_00752	857.336	0.374388	0.11146	3.35895	0.000782399	0.00141512
CNAG_00753	8184.27	0.319277	0.0670858	4.75923	1.94329e-06	4.69186e-06
CNAG_00754	7321.74	0.404505	0.098807	4.09389	4.24204e-05	8.84778e-05
CNAG_00755	3408.03	0.066216	0.112883	0.586591	0.557478	0.614252
CNAG_00756	1866.8	0.36632	0.122698	2.98555	0.00283071	0.00473017
CNAG_00757	5237.27	-0.170247	0.121081	-1.40606	0.159705	0.203048
CNAG_00758	5475.35	1.80645	0.102929	17.5505	5.89364e-69	1.94584e-67
CNAG_00759	1822.93	0.0677905	0.0797145	0.850417	0.395094	0.454784
CNAG_00760	4564.59	0.575684	0.0691806	8.32146	8.68829e-17	4.65164e-16
CNAG_00761	3993.24	0.0661117	0.0819304	0.806925	0.41971	0.480064
CNAG_00762	6567.43	0.945246	0.124289	7.60524	2.84382e-14	1.29364e-13
CNAG_00764	13616.6	1.10979	0.139899	7.93281	2.14244e-15	1.04362e-14
CNAG_00765	6636.28	2.58926	0.0957122	27.0525	3.56664e-161	4.7862e-159
CNAG_00766	4166.73	-0.0681256	0.125752	-0.541744	0.587995	0.642179
CNAG_00768	5982.58	-0.00477475	0.0928197	-0.0514411	0.958974	0.96852
CNAG_00769	8602.9	0.237895	0.0914069	2.6026	0.00925207	0.0144534
CNAG_00770	8559.49	0.923706	0.08825	10.4669	1.22557e-25	1.09525e-24
CNAG_00771	18177	0.477678	0.0888623	5.37548	7.63777e-08	2.09034e-07
CNAG_00772	4060.68	-0.016337	0.0855992	-0.190854	0.84864	0.877976
CNAG_00773	2165.64	0.452014	0.0932283	4.84847	1.24419e-06	3.05448e-06
CNAG_00774	8681.48	0.895668	0.0799577	11.2018	3.99678e-29	4.25232e-28
CNAG_00775	10880.2	1.27634	0.150716	8.46852	2.48536e-17	1.36851e-16
CNAG_00776	188360	4.46209	0.0856438	52.1006	0	0
CNAG_00777	11484.5	-0.288314	0.0965298	-2.98679	0.00281924	0.00471385
CNAG_00778	13707.4	-0.15162	0.105079	-1.44291	0.149046	0.190925
CNAG_00779	38288	0.601725	0.0968917	6.21028	5.28896e-10	1.75106e-09
CNAG_00780	4431.76	0.479876	0.169453	2.83192	0.00462701	0.00752036
CNAG_00781	1507.39	0.314394	0.145322	2.16343	0.0305084	0.0441597
CNAG_00782	3491.14	0.146539	0.0724878	2.02157	0.0432207	0.0610313
CNAG_00783	3626.41	0.619886	0.102186	6.06626	1.30926e-09	4.18482e-09
CNAG_00784	231.905	0.647226	0.192596	3.36054	0.000777894	0.00140789
CNAG_00785	63334	0.292061	0.096689	3.02062	0.00252259	0.0042503
CNAG_00786	1307.3	1.55292	0.175159	8.86574	7.59966e-19	4.62878e-18
CNAG_00787	3342.56	0.515802	0.139552	3.69612	0.000218917	0.000423284
CNAG_00788	19064.8	0.773072	0.0688313	11.2314	2.85914e-29	3.05759e-28
CNAG_00789	1013.71	-2.38025	0.200207	-11.8889	1.35117e-32	1.68542e-31
CNAG_00790	3506.31	-1.32013	0.133028	-9.9237	3.28339e-23	2.55545e-22
CNAG_00791	33806.7	0.215841	0.0999757	2.15893	0.0308555	0.0446311
CNAG_00792	8398.97	-0.146065	0.0583918	-2.50146	0.0123683	0.018988
CNAG_00793	4968.52	1.04161	0.119244	8.73517	2.43292e-18	1.43458e-17
CNAG_00794	7441.33	-0.401294	0.0621864	-6.45309	1.09593e-10	3.804e-10
CNAG_00795	12.8694	-0.961612	0.906992	-1.06022	0.289044	0.345773
CNAG_00796	10490.2	0.109571	0.0663008	1.65264	0.0984039	0.130266
CNAG_00797	7562.43	-0.185637	0.103789	-1.7886	0.0736792	0.0998064
CNAG_00798	3459.43	-0.326289	0.11749	-2.77716	0.00548361	0.00881617
CNAG_00799	81777.5	-0.262965	0.0722649	-3.6389	0.000273803	0.000522727
CNAG_00800	2288.44	0.826636	0.111922	7.3858	1.5154e-13	6.50237e-13
CNAG_00801	1558.84	0.586716	0.140125	4.1871	2.8254e-05	6.00136e-05
CNAG_00802	1474.14	-0.119613	0.112025	-1.06773	0.285641	0.342242
CNAG_00803	7721.05	-0.116714	0.0740066	-1.57707	0.114779	0.149868
CNAG_00804	3641.59	0.489222	0.0838875	5.83188	5.48062e-09	1.66601e-08
CNAG_00805	2671.93	-0.523978	0.128488	-4.07802	4.54209e-05	9.457e-05
CNAG_00806	17641.9	0.121345	0.0978061	1.24066	0.21473	0.265254
CNAG_00807	7702.51	0.0707861	0.141659	0.499693	0.617291	0.669604
CNAG_00808	7632.3	-0.2844	0.0849989	-3.34592	0.000820104	0.00147946
CNAG_00809	45677.8	0.799438	0.101741	7.85756	3.91703e-15	1.87512e-14
CNAG_00810	3519.37	-0.0454869	0.0791459	-0.574722	0.56548	0.621833
CNAG_00811	5782.49	0.450808	0.0851883	5.29191	1.21048e-07	3.25718e-07
CNAG_00812	8576.46	0.75122	0.12199	6.15806	7.3642e-10	2.39993e-09
CNAG_00813	142.28	0.737264	0.222476	3.3139	0.000920038	0.00164582
CNAG_00814	8928.05	-1.26625	0.0959821	-13.1925	9.68921e-40	1.53844e-38
CNAG_00815	80746.8	1.43391	0.168355	8.51718	1.63479e-17	9.13462e-17
CNAG_00816	18525	-0.577469	0.123617	-4.67143	2.99105e-06	7.06775e-06
CNAG_00817	1897.11	0.617079	0.0963063	6.40746	1.47965e-10	5.09339e-10
CNAG_00818	17781.4	0.603354	0.0859095	7.02313	2.16947e-12	8.60753e-12
CNAG_00819	14636.3	0.390275	0.251018	1.55477	0.120001	0.156124
CNAG_00820	2175.46	0.494402	0.117321	4.2141	2.50781e-05	5.36237e-05
CNAG_00821	24270.9	0.225071	0.0736186	3.05726	0.0022337	0.00379428
CNAG_00822	14105.4	1.03374	0.0964383	10.7192	8.27541e-27	8.02464e-26
CNAG_00823	6475.17	0.249943	0.108564	2.30227	0.0213198	0.0315737
CNAG_00824	4703.17	0.107529	0.0812009	1.32423	0.185426	0.232516
CNAG_00825	7062.42	-0.279918	0.0607331	-4.60898	4.04646e-06	9.43305e-06
CNAG_00826	2542.21	1.59382	0.107634	14.8078	1.30503e-49	2.77694e-48
CNAG_00827	118.831	-0.34176	0.298338	-1.14555	0.251982	0.305745
CNAG_00828	1044.23	0.000442486	0.164201	0.00269478	0.99785	0.999893
CNAG_00829	6642.82	-0.209997	0.0705368	-2.97712	0.0029097	0.00485435
CNAG_00830	3038.39	1.26622	0.106305	11.9112	1.0347e-32	1.29454e-31
CNAG_00831	6939.52	0.36333	0.0904927	4.01503	5.94393e-05	0.000121987
CNAG_00832	2154.34	-0.410642	0.129044	-3.18219	0.00146166	0.00254574
CNAG_00833	1522.54	0.298433	0.143481	2.07994	0.0375306	0.0537166
CNAG_00834	15608.5	2.191	0.163064	13.4365	3.69658e-41	6.18823e-40
CNAG_00835	1974.98	-0.0830287	0.101319	-0.819482	0.412512	0.472936
CNAG_00836	2301.78	1.48482	0.100516	14.772	2.22136e-49	4.6908e-48
CNAG_00837	4169.57	0.640096	0.073731	8.6815	3.90582e-18	2.27089e-17
CNAG_00838	981.623	1.52586	0.152729	9.99068	1.67425e-23	1.32791e-22
CNAG_00839	689.413	-0.168202	0.151413	-1.11088	0.266619	0.321256
CNAG_00840	117.319	1.5106	0.31298	4.82651	1.38948e-06	3.39515e-06
CNAG_00841	1316.52	0.255849	0.131411	1.94693	0.0515426	0.0716755
CNAG_00843	2047.76	-0.635377	0.105065	-6.04746	1.47146e-09	4.68525e-09
CNAG_00844	406.283	-0.781589	0.229505	-3.40555	0.000660315	0.00120611
CNAG_00845	8309.41	1.28749	0.120954	10.6445	1.85013e-26	1.76123e-25
CNAG_00846	5069.66	1.49156	0.184441	8.08692	6.11902e-16	3.10239e-15
CNAG_00847	1839.47	0.659141	0.106974	6.16169	7.19732e-10	2.35014e-09
CNAG_00848	148244	1.37418	0.217389	6.32131	2.59349e-10	8.78934e-10
CNAG_00849	2104.73	1.28514	0.132745	9.68124	3.62286e-22	2.65336e-21
CNAG_00850	506.027	-1.36242	0.188607	-7.22358	5.0636e-13	2.09285e-12
CNAG_00851	1413.47	-1.66819	0.197864	-8.43102	3.42662e-17	1.87439e-16
CNAG_00852	7181.35	0.212081	0.10482	2.02328	0.0430438	0.0608125
CNAG_00853	3248.43	0.445579	0.0827088	5.38733	7.15138e-08	1.96627e-07
CNAG_00854	10218.7	-0.576541	0.0965606	-5.97077	2.36137e-09	7.4138e-09
CNAG_00855	3234.26	0.465381	0.0834895	5.57413	2.48768e-08	7.13952e-08
CNAG_00858	8077.72	-0.866509	0.0795213	-10.8966	1.19683e-27	1.20992e-26
CNAG_00859	2159.02	-0.657888	0.133748	-4.91885	8.70547e-07	2.16855e-06
CNAG_00860	5990.2	-0.940444	0.0908063	-10.3566	3.90632e-25	3.38195e-24
CNAG_00861	579.985	0.115968	0.163512	0.709232	0.478181	0.537485
CNAG_00862	1858.77	0.251721	0.114051	2.2071	0.0273072	0.0399309
CNAG_00863	2330.59	-0.00573568	0.0757983	-0.0756704	0.939681	0.954008
CNAG_00864	1328.41	-0.121887	0.114963	-1.06023	0.28904	0.345773
CNAG_00865	53.1137	-0.546699	0.360538	-1.51634	0.129433	0.1674
CNAG_00866	12962.3	1.01107	0.131509	7.68819	1.49234e-14	6.9133e-14
CNAG_00867	2556.12	1.77338	0.120182	14.7558	2.82247e-49	5.93004e-48
CNAG_00868	0.395277	0.851977	5.2679	0.16173	0.871519	0.896629
CNAG_00869	3540.55	-0.299897	0.10875	-2.75768	0.00582123	0.00933552
CNAG_00870	8745.72	0.326548	0.115969	2.81583	0.00486512	0.00787773
CNAG_00871	11116.2	-0.395303	0.0699954	-5.64755	1.62752e-08	4.75788e-08
CNAG_00872	26788.7	0.416962	0.0749902	5.56021	2.69447e-08	7.71437e-08
CNAG_00873	44505.3	0.647079	0.0740875	8.73398	2.45857e-18	1.44868e-17
CNAG_00874	20910.3	1.17809	0.103817	11.3477	7.61003e-30	8.30911e-29
CNAG_00875	2269.8	-0.292173	0.0966311	-3.02359	0.00249793	0.00421215
CNAG_00876	29015.2	2.02023	0.0965626	20.9214	3.41646e-97	1.78773e-95
CNAG_00877	2764.28	-0.225677	0.0871652	-2.58907	0.00962347	0.0149939
CNAG_00878	3414.28	-0.342948	0.0769496	-4.45679	8.31952e-06	1.87991e-05
CNAG_00879	36472.8	-0.700011	0.0697472	-10.0364	1.05446e-23	8.43571e-23
CNAG_00883	27184.3	-0.945061	0.0939775	-10.0562	8.62252e-24	6.94476e-23
CNAG_00884	10350.9	-0.538656	0.0803765	-6.70166	2.06071e-11	7.55625e-11
CNAG_00885	225.369	1.19814	0.371774	3.22277	0.00126956	0.00223078
CNAG_00886	52334.2	0.697007	0.0927513	7.5148	5.69981e-14	2.55509e-13
CNAG_00887	456.197	-1.23689	0.220547	-5.60829	2.04334e-08	5.91735e-08
CNAG_00888	7923.1	-0.804012	0.0982622	-8.18231	2.78446e-16	1.44431e-15
CNAG_00889	1510.82	-0.36644	0.0979306	-3.74183	0.000182683	0.000357042
CNAG_00890	9568.62	-0.263335	0.0795015	-3.31232	0.000925253	0.00165444
CNAG_00891	29541.6	0.341424	0.097221	3.51183	0.000445027	0.000828742
CNAG_00892	719.021	-1.02506	0.168799	-6.07265	1.25814e-09	4.0338e-09
CNAG_00893	10032.2	0.322987	0.0913489	3.53575	0.000406624	0.000759738
CNAG_00894	8688.12	-0.261549	0.13036	-2.00635	0.0448185	0.0629989
CNAG_00895	109584	4.41594	0.135957	32.4804	2.01853e-231	7.63372e-229
CNAG_00896	4260.02	-0.320598	0.104846	-3.05779	0.00222976	0.00378913
CNAG_00897	40408.6	-0.511763	0.0877262	-5.83365	5.4229e-09	1.64967e-08
CNAG_00898	208.649	-0.33621	0.236785	-1.4199	0.155637	0.198361
CNAG_00899	6330.23	1.44815	0.149926	9.6591	4.49779e-22	3.27685e-21
CNAG_00900	619.275	0.801174	0.172962	4.63207	3.6203e-06	8.47998e-06
CNAG_00901	725.139	-0.469446	0.175379	-2.67674	0.00743413	0.0117791
CNAG_00902	2110.1	-0.788152	0.100916	-7.81001	5.71835e-15	2.71402e-14
CNAG_00903	14741	0.492984	0.0899379	5.48138	4.22022e-08	1.18703e-07
CNAG_00904	1575.11	2.05467	0.136038	15.1037	1.53089e-51	3.37851e-50
CNAG_00905	9040.87	1.71872	0.0854435	20.1152	5.42683e-90	2.56541e-88
CNAG_00906	20561.1	0.574795	0.17115	3.35843	0.000783865	0.00141716
CNAG_00907	3534.38	-1.2953	0.0971551	-13.3323	1.50137e-40	2.4493e-39
CNAG_00908	1338.6	-1.51074	0.104293	-14.4856	1.49484e-47	2.99688e-46
CNAG_00909	5433.73	0.574784	0.108152	5.31461	1.06886e-07	2.88919e-07
CNAG_00911	80.394	0.561137	0.360285	1.55748	0.119356	0.155381
CNAG_00914	30429.5	1.98865	0.0659531	30.1525	9.94222e-200	2.23566e-197
CNAG_00915	4969.47	-0.0948542	0.08897	-1.06614	0.286362	0.343057
CNAG_00916	3174.66	0.670791	0.0752319	8.91631	4.82086e-19	2.98879e-18
CNAG_00917	5852.39	0.52504	0.0785266	6.68615	2.29125e-11	8.38679e-11
CNAG_00919	28835.9	1.67515	0.0838172	19.9858	7.32656e-89	3.31288e-87
CNAG_00920	5333.91	1.0746	0.104458	10.2874	8.03124e-25	6.8323e-24
CNAG_00921	2059.44	0.0412524	0.149522	0.275895	0.782628	0.819774
CNAG_00922	3391.75	0.643221	0.0792886	8.11241	4.96266e-16	2.52843e-15
CNAG_00923	2764.03	-0.445235	0.0895852	-4.96996	6.6966e-07	1.68989e-06
CNAG_00924	1.78364	-0.647425	1.79544	-0.360594	0.718403	0.76229
CNAG_00925	5366.94	-0.602688	0.0664696	-9.06712	1.222e-19	7.79679e-19
CNAG_00926	6004.51	0.0989003	0.0817147	1.21031	0.226159	0.27757
CNAG_00927	5648.7	0.615404	0.0771792	7.9737	1.53989e-15	7.56755e-15
CNAG_00928	4150.98	0.790593	0.109555	7.21641	5.33785e-13	2.20183e-12
CNAG_00929	5441.29	-0.494284	0.108445	-4.55794	5.16585e-06	1.19058e-05
CNAG_00930	32291	0.249254	0.0988202	2.5223	0.011659	0.0179602
CNAG_00931	1007.67	0.166195	0.137794	1.20611	0.227775	0.279305
CNAG_00932	4076.83	1.02923	0.131834	7.80703	5.85516e-15	2.77736e-14
CNAG_00933	2675.59	-0.194152	0.13702	-1.41696	0.156493	0.19933
CNAG_00934	3654.99	0.643924	0.125586	5.12737	2.93814e-07	7.65352e-07
CNAG_00935	17743.2	0.739447	0.085269	8.67194	4.24833e-18	2.46314e-17
CNAG_00936	5149.77	-0.972077	0.108038	-8.99757	2.30777e-19	1.4557e-18
CNAG_00937	225.631	0.117388	0.219323	0.535229	0.592492	0.646157
CNAG_00938	4918.54	-0.236605	0.0790932	-2.99147	0.00277634	0.00464865
CNAG_00939	82.1125	-0.441928	0.251036	-1.76042	0.0783367	0.105566
CNAG_00940	8597.57	0.515764	0.0625651	8.24364	1.6705e-16	8.78544e-16
CNAG_00941	1146.52	0.950931	0.123661	7.68985	1.47305e-14	6.83152e-14
CNAG_00960	10880.5	-0.18145	0.0898652	-2.01913	0.0434735	0.061324
CNAG_00961	11557.3	-0.935195	0.302082	-3.09583	0.00196261	0.00336263
CNAG_00964	9313.75	-0.523382	0.0815384	-6.41884	1.37315e-10	4.73266e-10
CNAG_00966	4015.34	-0.0098545	0.0727503	-0.135457	0.892251	0.915355
CNAG_00967	3472.73	-0.738624	0.0950714	-7.76915	7.90143e-15	3.72886e-14
CNAG_00968	1017.5	0.093976	0.180161	0.521623	0.601933	0.655165
CNAG_00969	1825.22	-0.299092	0.103689	-2.88451	0.00392028	0.00643074
CNAG_00970	5974.42	0.0612575	0.0768225	0.79739	0.425224	0.485504
CNAG_00971	1309.31	-0.24742	0.137173	-1.8037	0.071278	0.0968059
CNAG_00972	3884.81	-1.35023	0.0968406	-13.9428	3.4782e-44	6.31848e-43
CNAG_00973	2637.75	-0.037411	0.109829	-0.340628	0.733384	0.775416
CNAG_00974	1436.56	-0.906856	0.117922	-7.6903	1.46787e-14	6.81131e-14
CNAG_00975	4914.83	-1.87172	0.0746896	-25.06	1.35967e-138	1.45031e-136
CNAG_00976	20088.6	0.348853	0.114574	3.04478	0.00232852	0.00394408
CNAG_00977	3976.94	-0.892786	0.10053	-8.88081	6.63755e-19	4.06959e-18
CNAG_00978	741.183	-0.553354	0.160333	-3.45129	0.000557916	0.00102696
CNAG_00979	294729	-1.23648	0.0561571	-22.0182	1.92685e-107	1.2145e-105
CNAG_00980	1486.76	-2.2216	0.225394	-9.85651	6.42422e-23	4.90362e-22
CNAG_00981	2240.5	-0.513205	0.110675	-4.63703	3.53447e-06	8.28828e-06
CNAG_00982	2322.96	0.107925	0.0848856	1.27142	0.203579	0.252689
CNAG_00983	5749.36	-1.88701	0.0842675	-22.3931	4.59738e-111	3.16117e-109
CNAG_00984	46166.7	1.60009	0.143453	11.1541	6.8365e-29	7.22741e-28
CNAG_00985	2215.31	-0.673332	0.12024	-5.59989	2.14488e-08	6.19631e-08
CNAG_00986	1863.72	0.41189	0.0992041	4.15195	3.29657e-05	6.95246e-05
CNAG_00987	3130.23	-0.470078	0.105641	-4.44975	8.59709e-06	1.93737e-05
CNAG_00988	13808.6	0.25065	0.0513205	4.88401	1.03951e-06	2.57325e-06
CNAG_00989	1198.66	-0.665543	0.102212	-6.51139	7.44599e-11	2.6228e-10
CNAG_00990	12387.6	-0.163291	0.0605769	-2.6956	0.00702625	0.0111604
CNAG_00991	3650.42	-0.0424566	0.11357	-0.373836	0.708526	0.753732
CNAG_00992	26049	0.683525	0.0960182	7.11871	1.08946e-12	4.41084e-12
CNAG_00993	3438.04	0.235262	0.12531	1.87745	0.0604571	0.0831685
CNAG_00994	3726.62	0.0894181	0.0980599	0.911871	0.361836	0.420399
CNAG_00995	26834.2	-0.0691141	0.215518	-0.320689	0.748446	0.789136
CNAG_00996	15103.1	-0.0846643	0.08324	-1.01711	0.309101	0.366917
CNAG_00997	1524.44	-0.642815	0.215649	-2.98085	0.00287452	0.00479952
CNAG_00998	11913.6	0.148533	0.0926347	1.60343	0.10884	0.142854
CNAG_00999	2452.92	-0.728819	0.0918837	-7.93197	2.15694e-15	1.05007e-14
CNAG_01000	9968.37	0.565703	0.0895039	6.32042	2.60848e-10	8.83655e-10
CNAG_01001	2700.32	0.0870592	0.113837	0.76477	0.444408	0.504362
CNAG_01002	2813.56	0.559175	0.0850844	6.57201	4.96411e-11	1.77259e-10
CNAG_01003	7864.4	0.0617039	0.11655	0.529422	0.596513	0.649861
CNAG_01004	12773.2	-0.472922	0.0839905	-5.63066	1.7952e-08	5.23337e-08
CNAG_01005	11023.3	-0.466114	0.0796749	-5.8502	4.90977e-09	1.50016e-08
CNAG_01006	1789.08	-0.539213	0.0978239	-5.51207	3.5463e-08	1.00426e-07
CNAG_01007	3063.33	-0.558378	0.127854	-4.3673	1.25789e-05	2.78565e-05
CNAG_01008	1273.27	0.89831	0.130841	6.86564	6.61943e-12	2.54147e-11
CNAG_01009	9039.38	-0.297515	0.0710183	-4.18927	2.79854e-05	5.94735e-05
CNAG_01010	7485.56	-0.0734873	0.0833102	-0.882092	0.377727	0.437152
CNAG_01011	5456.73	0.646378	0.0639172	10.1127	4.85101e-24	3.9453e-23
CNAG_01012	1387.11	-0.161778	0.124001	-1.30466	0.19201	0.239977
CNAG_01013	5115.66	0.507904	0.0804413	6.31396	2.71978e-10	9.19861e-10
CNAG_01014	21892.7	0.893727	0.0736251	12.1389	6.57187e-34	8.69284e-33
CNAG_01015	7822.52	-0.704206	0.0890756	-7.90571	2.66407e-15	1.28493e-14
CNAG_01016	5523.17	-0.271922	0.0897897	-3.02844	0.00245824	0.00415111
CNAG_01017	9962.64	0.801256	0.0726427	11.0301	2.7355e-28	2.82374e-27
CNAG_01018	14737.7	0.0800602	0.0709389	1.12858	0.259075	0.313119
CNAG_01019	28376.9	-0.920551	0.133348	-6.90337	5.07824e-12	1.96425e-11
CNAG_01020	3242.23	0.0215847	0.111754	0.193145	0.846846	0.876447
CNAG_01021	5877.67	0.375838	0.0892871	4.20932	2.5614e-05	5.46853e-05
CNAG_01022	4087.04	-0.41018	0.0935287	-4.38561	1.1566e-05	2.57435e-05
CNAG_01023	7498.1	-0.614875	0.108277	-5.67871	1.35714e-08	3.98709e-08
CNAG_01024	9688.56	-0.0678899	0.0597347	-1.13652	0.255738	0.309669
CNAG_01025	5639.54	-0.906381	0.0995679	-9.10314	8.7754e-20	5.64666e-19
CNAG_01026	4037.17	-0.576545	0.105224	-5.47924	4.27155e-08	1.20025e-07
CNAG_01027	3472.47	-0.299269	0.138165	-2.16603	0.0303088	0.0439166
CNAG_01028	1383.88	-0.253398	0.145499	-1.74158	0.0815823	0.109549
CNAG_01029	3463.05	-0.468723	0.100691	-4.65507	3.23871e-06	7.62785e-06
CNAG_01030	2314.73	0.0558026	0.14381	0.388029	0.697995	0.744623
CNAG_01031	12969.5	0.0108183	0.233585	0.0463141	0.96306	0.97182
CNAG_01032	2792.58	-0.765561	0.125237	-6.11292	9.7827e-10	3.16078e-09
CNAG_01033	2986.41	0.389357	0.0874434	4.45267	8.48082e-06	1.91324e-05
CNAG_01034	4640.74	-0.211894	0.0827029	-2.56211	0.0104039	0.0161348
CNAG_01035	8749.16	0.0233398	0.0765196	0.305017	0.760353	0.800574
CNAG_01036	1565.62	0.0540862	0.100502	0.538158	0.590468	0.644541
CNAG_01037	3692.83	0.321427	0.108443	2.96401	0.00303655	0.00504715
CNAG_01038	2199.83	-0.153547	0.111097	-1.3821	0.166942	0.211312
CNAG_01039	12213.6	-0.38822	0.0917715	-4.23029	2.33392e-05	5.01762e-05
CNAG_01040	7116.04	-2.72968	0.094443	-28.9029	1.09801e-183	2.1751e-181
CNAG_01041	1768.05	-0.961569	0.105369	-9.12574	7.12466e-20	4.60942e-19
CNAG_01042	3135.99	0.244746	0.0887434	2.75791	0.00581722	0.00933088
CNAG_01043	21307	-0.427214	0.137971	-3.09639	0.00195891	0.00335698
CNAG_01044	7416.23	0.0402909	0.105136	0.383228	0.701551	0.747554
CNAG_01045	9247.71	-0.0332891	0.0813638	-0.409139	0.682438	0.730838
CNAG_01046	7556.06	0.350272	0.096351	3.63537	0.000277578	0.000529222
CNAG_01047	8729.54	2.61407	0.153586	17.0202	5.81796e-65	1.77309e-63
CNAG_01048	10432.6	-0.761706	0.0717966	-10.6092	2.70004e-26	2.54122e-25
CNAG_01049	4651.61	0.0141029	0.151712	0.0929586	0.925936	0.942706
CNAG_01050	1831.36	-0.402687	0.15442	-2.60773	0.00911443	0.0142622
CNAG_01051	10294.5	0.581857	0.0694913	8.37308	5.61294e-17	3.03048e-16
CNAG_01052	50063.4	-0.193999	0.227012	-0.854575	0.392787	0.452629
CNAG_01053	6705.19	0.121931	0.0946385	1.28839	0.197612	0.246201
CNAG_01054	2520.81	-0.19974	0.0986692	-2.02434	0.0429351	0.0606795
CNAG_01055	56149.4	1.35057	0.116268	11.616	3.41763e-31	3.96579e-30
CNAG_01056	511.152	0.437329	0.159347	2.74452	0.00605999	0.00969599
CNAG_01057	5170.77	0.124467	0.0756135	1.64609	0.0997449	0.131692
CNAG_01058	3343.93	0.3954	0.0720792	5.48563	4.11993e-08	1.15999e-07
CNAG_01059	5474.68	-0.477857	0.0712436	-6.70737	1.98158e-11	7.28212e-11
CNAG_01060	16820.2	0.452688	0.0837789	5.40337	6.54007e-08	1.80655e-07
CNAG_01061	1541.21	-0.584445	0.106828	-5.47091	4.4774e-08	1.25639e-07
CNAG_01062	9958.9	0.112655	0.0804949	1.39952	0.161656	0.205278
CNAG_01063	6896.07	0.133648	0.0886469	1.50764	0.131646	0.170129
CNAG_01064	1461.98	0.517647	0.113662	4.55427	5.25678e-06	1.20952e-05
CNAG_01065	1666.88	-0.443763	0.105092	-4.22262	2.41481e-05	5.18196e-05
CNAG_01069	7548.02	-0.175394	0.0698589	-2.51069	0.0120494	0.0185307
CNAG_01070	1220.15	-0.373235	0.115379	-3.23485	0.00121706	0.00214351
CNAG_01071	4769.48	0.591839	0.112338	5.26837	1.37638e-07	3.68689e-07
CNAG_01072	1136.21	0.177578	0.160373	1.10728	0.268172	0.322932
CNAG_01073	2202.33	0.44141	0.137229	3.2166	0.0012972	0.00227646
CNAG_01074	503.996	-0.412151	0.178157	-2.31342	0.0206996	0.0307263
CNAG_01075	231.77	0.382763	0.233309	1.64058	0.100884	0.133041
CNAG_01076	595.733	-0.130149	0.147506	-0.882328	0.377599	0.437065
CNAG_01077	625.772	0.0554102	0.134193	0.412914	0.67967	0.72853
CNAG_01078	636.116	0.928719	0.125837	7.38035	1.57877e-13	6.76382e-13
CNAG_01079	351.435	0.496552	0.202538	2.45165	0.0142205	0.0216139
CNAG_01080	3968.17	-0.115599	0.0798856	-1.44706	0.147881	0.189667
CNAG_01081	4593.42	-1.02537	0.121864	-8.41407	3.96017e-17	2.16057e-16
CNAG_01082	9359.01	0.525314	0.140493	3.73908	0.000184693	0.000360883
CNAG_01083	10354.1	-0.243161	0.0657358	-3.69906	0.000216402	0.000418713
CNAG_01084	2979.9	-0.00326502	0.0955397	-0.0341745	0.972738	0.979685
CNAG_01085	1283.28	-0.474659	0.122181	-3.88488	0.00010238	0.000205303
CNAG_01086	910.302	-0.877718	0.185275	-4.73737	2.16506e-06	5.19713e-06
CNAG_01087	8608.22	-0.9356	0.0875706	-10.6839	1.21019e-26	1.16536e-25
CNAG_01088	9370.77	-0.533683	0.0883187	-6.0427	1.51559e-09	4.82023e-09
CNAG_01089	1758.54	-0.262399	0.105931	-2.47709	0.0132459	0.0202361
CNAG_01090	30927.9	1.42425	0.102518	13.8927	7.01499e-44	1.26331e-42
CNAG_01091	11528.3	0.314072	0.085133	3.6892	0.000224963	0.000434166
CNAG_01092	2787.38	0.37601	0.0879784	4.27389	1.92088e-05	4.16734e-05
CNAG_01093	2276.36	-0.233403	0.0932399	-2.50325	0.012306	0.0189043
CNAG_01094	9245.69	0.264797	0.0797167	3.32172	0.000894635	0.00160521
CNAG_01095	4591.22	-0.516132	0.0895398	-5.76427	8.20103e-09	2.45441e-08
CNAG_01096	1122.78	0.831008	0.135227	6.1453	7.98117e-10	2.59495e-09
CNAG_01097	7605.98	-0.658936	0.0869208	-7.58088	3.43217e-14	1.55532e-13
CNAG_01098	13703.5	0.955592	0.11219	8.51764	1.62843e-17	9.10522e-17
CNAG_01099	8078.95	0.405879	0.0788924	5.14471	2.67929e-07	7.01438e-07
CNAG_01100	4582.65	0.176613	0.0912932	1.93457	0.0530425	0.0735645
CNAG_01101	8870.88	0.546051	0.108929	5.01293	5.36087e-07	1.36274e-06
CNAG_01102	23830.5	-0.487796	0.297872	-1.6376	0.101505	0.133732
CNAG_01103	3363.62	0.0526598	0.0775768	0.678809	0.497259	0.556673
CNAG_01104	7104.35	1.35592	0.120527	11.2499	2.3188e-29	2.49256e-28
CNAG_01105	6173.54	0.437248	0.144321	3.0297	0.00244798	0.00413463
CNAG_01106	9887.89	-0.0804418	0.0620368	-1.29668	0.194742	0.242844
CNAG_01107	4158.75	0.220393	0.0911296	2.41846	0.0155863	0.0235693
CNAG_01108	2238.54	-1.40032	0.0904104	-15.4885	4.15101e-54	9.75605e-53
CNAG_01109	14241	-0.0375878	0.0636105	-0.590906	0.554584	0.611954
CNAG_01110	2735.64	-0.130958	0.113473	-1.15409	0.248463	0.301915
CNAG_01111	7940.07	0.461174	0.0789892	5.83845	5.2688e-09	1.60456e-08
CNAG_01112	13952.2	0.20534	0.099176	2.07046	0.0384093	0.0548422
CNAG_01113	2114.13	0.855951	0.148092	5.77987	7.47586e-09	2.24708e-08
CNAG_01114	925.347	-0.385344	0.117253	-3.28643	0.00101467	0.00180656
CNAG_01115	12144	0.731676	0.0923674	7.92137	2.34914e-15	1.13765e-14
CNAG_01116	4384.52	-0.568018	0.0675252	-8.41195	4.03242e-17	2.19423e-16
CNAG_01117	188553	-0.20911	0.0758948	-2.75527	0.00586441	0.00939752
CNAG_01118	1506.71	0.376925	0.162339	2.32184	0.0202415	0.0301161
CNAG_01119	4105.03	0.655106	0.0955482	6.85628	7.06764e-12	2.70357e-11
CNAG_01120	17143.2	-0.0837032	0.0786034	-1.06488	0.28693	0.343638
CNAG_01121	3927.3	-0.386568	0.112455	-3.43753	0.000587053	0.00107844
CNAG_01122	983.691	0.538953	0.16958	3.17816	0.00148211	0.0025792
CNAG_01123	5980.18	0.182149	0.137328	1.32638	0.184713	0.231692
CNAG_01124	2254.25	1.13162	0.122969	9.20253	3.49623e-20	2.2995e-19
CNAG_01125	13383.5	-0.039012	0.0776008	-0.502727	0.615156	0.667462
CNAG_01126	13508.3	0.0835971	0.0718554	1.16341	0.244664	0.29769
CNAG_01127	6895.7	-0.169312	0.0684863	-2.4722	0.0134286	0.0204926
CNAG_01128	2879.13	-0.853394	0.106352	-8.02426	1.02139e-15	5.11003e-15
CNAG_01129	7066.56	-0.00323274	0.0841258	-0.0384274	0.969347	0.976861
CNAG_01130	11655.1	0.454021	0.105204	4.31564	1.59141e-05	3.48435e-05
CNAG_01131	7553.78	0.281436	0.0711535	3.95534	7.64266e-05	0.000155128
CNAG_01132	7372.38	1.22136	0.1237	9.87361	5.41809e-23	4.15853e-22
CNAG_01133	1879.89	0.228422	0.114461	1.99564	0.0459731	0.0644585
CNAG_01134	3639.19	0.410351	0.0981906	4.17913	2.92632e-05	6.1999e-05
CNAG_01135	10836.3	-0.436676	0.0677506	-6.44534	1.15339e-10	4.0001e-10
CNAG_01136	8061.31	1.67025	0.11816	14.1355	2.29619e-45	4.36171e-44
CNAG_01137	14362.3	-2.10337	0.139012	-15.1309	1.01296e-51	2.24143e-50
CNAG_01138	2288.64	-0.343087	0.168709	-2.0336	0.0419916	0.0594672
CNAG_01139	1161.26	0.351545	0.170857	2.05754	0.0396341	0.0564167
CNAG_01140	13219.5	1.00895	0.122294	8.25017	1.58163e-16	8.33388e-16
CNAG_01141	2729.17	0.773861	0.139653	5.54131	3.00211e-08	8.56569e-08
CNAG_01142	3877.96	-0.139477	0.105261	-1.32506	0.185152	0.232208
CNAG_01143	5595.17	0.446736	0.0880891	5.07141	3.9487e-07	1.0165e-06
CNAG_01144	13028.1	0.333909	0.0933207	3.57808	0.000346127	0.000652567
CNAG_01145	3343.24	-0.0897238	0.0919244	-0.976061	0.329034	0.387263
CNAG_01146	14362	1.00847	0.109465	9.21277	3.17829e-20	2.09701e-19
CNAG_01147	4882.9	-0.226727	0.0915499	-2.47654	0.0132662	0.0202635
CNAG_01148	31542.6	0.805154	0.106754	7.54217	4.6221e-14	2.0832e-13
CNAG_01149	10154.1	0.634478	0.0791883	8.01227	1.12607e-15	5.61011e-15
CNAG_01150	121183	-0.881221	0.0825775	-10.6714	1.38461e-26	1.32872e-25
CNAG_01151	4902.87	-0.210067	0.0843869	-2.48933	0.0127982	0.0196062
CNAG_01152	53135.9	0.409704	0.119931	3.41615	0.000635123	0.0011629
CNAG_01153	27416.9	0.153721	0.0855635	1.79658	0.0724025	0.0982049
CNAG_01154	4399.55	1.22029	0.0840472	14.5191	9.1674e-48	1.86486e-46
CNAG_01155	18548.5	-0.0198527	0.0828322	-0.239673	0.810584	0.84512
CNAG_01156	9959.41	0.547851	0.0772749	7.08963	1.34468e-12	5.41256e-12
CNAG_01157	4885.7	-0.360092	0.071046	-5.06843	4.01109e-07	1.03128e-06
CNAG_01158	17751.1	0.0810657	0.0614684	1.31882	0.18723	0.234531
CNAG_01159	6270.69	0.160431	0.0861949	1.86126	0.0627073	0.0859655
CNAG_01161	5461.91	-0.00938923	0.0921719	-0.101867	0.918863	0.937224
CNAG_01162	3241.43	-0.769924	0.084444	-9.11756	7.68313e-20	4.96302e-19
CNAG_01163	15979.2	0.72087	0.110859	6.50261	7.89364e-11	2.77579e-10
CNAG_01164	42713.9	0.150198	0.0923507	1.62639	0.103867	0.136694
CNAG_01165	4985.92	-2.2063	0.0917775	-24.0397	1.06981e-127	9.88976e-126
CNAG_01166	2642.7	-1.74451	0.0842496	-20.7065	3.02761e-95	1.55492e-93
CNAG_01167	7816.99	0.133175	0.099136	1.34336	0.179156	0.225265
CNAG_01168	28837.3	0.682112	0.0851609	8.00969	1.15e-15	5.71225e-15
CNAG_01169	2466.52	-0.174169	0.110041	-1.58276	0.113476	0.148307
CNAG_01170	49441.7	0.198332	0.0589828	3.36255	0.000772271	0.00139863
CNAG_01171	5016.17	0.419738	0.162188	2.58798	0.00965417	0.0150304
CNAG_01172	6201.75	0.578891	0.0831994	6.95788	3.45431e-12	1.35119e-11
CNAG_01173	4161.85	-0.156003	0.105448	-1.47942	0.139028	0.178836
CNAG_01174	47724.4	1.17286	0.075219	15.5926	8.16953e-55	1.94758e-53
CNAG_01175	4786.98	0.512941	0.0770483	6.6574	2.78723e-11	1.01442e-10
CNAG_01177	4653.8	0.425496	0.108966	3.90486	9.42806e-05	0.000189839
CNAG_01178	2825.83	0.00915816	0.0977778	0.093663	0.925377	0.942367
CNAG_01179	8797.01	1.23471	0.0992795	12.4367	1.65204e-35	2.31787e-34
CNAG_01180	1821.42	-0.803983	0.0867256	-9.27042	1.85406e-20	1.23604e-19
CNAG_01181	55320	0.329915	0.0701151	4.70533	2.53457e-06	6.05271e-06
CNAG_01182	25109.4	-0.863109	0.0908484	-9.50054	2.08799e-21	1.46723e-20
CNAG_01183	4940.44	-0.135102	0.105524	-1.28029	0.200442	0.249204
CNAG_01184	7588.4	-0.233732	0.0813099	-2.87459	0.00404556	0.00662971
CNAG_01185	6185.88	-0.13965	0.0744859	-1.87485	0.0608128	0.0836025
CNAG_01186	13350.8	0.157109	0.0762952	2.05923	0.0394724	0.0562346
CNAG_01187	9460.86	0.477382	0.117108	4.07643	4.5732e-05	9.51701e-05
CNAG_01188	5834.74	-0.0132371	0.109632	-0.120742	0.903896	0.924792
CNAG_01189	25523.4	0.983429	0.13508	7.28034	3.32985e-13	1.39428e-12
CNAG_01190	3566.49	-0.278101	0.0894801	-3.10797	0.00188379	0.00323692
CNAG_01191	6086.03	-0.303381	0.0757036	-4.00748	6.13688e-05	0.000125699
CNAG_01192	1330.76	-0.939296	0.0822758	-11.4164	3.4614e-30	3.86043e-29
CNAG_01193	4589.37	-2.1812	0.0803373	-27.1505	2.49782e-162	3.58308e-160
CNAG_01194	249.487	0.516369	0.255104	2.02415	0.0429546	0.0606967
CNAG_01195	9359.58	0.0307222	0.0880493	0.34892	0.727149	0.770293
CNAG_01196	4904.52	-0.0499936	0.0889875	-0.561805	0.574249	0.629977
CNAG_01197	3848.88	0.842021	0.0995919	8.45471	2.7977e-17	1.53846e-16
CNAG_01198	3756.64	0.278298	0.159838	1.74112	0.0816622	0.109638
CNAG_01199	5976.17	0.284381	0.0771607	3.68557	0.000228191	0.000439987
CNAG_01200	1520.45	0.26953	0.0941923	2.86148	0.00421662	0.0068924
CNAG_01201	2519.6	0.490759	0.115225	4.25914	2.05217e-05	4.43136e-05
CNAG_01202	2451.55	1.33934	0.186278	7.18997	6.4805e-13	2.65343e-12
CNAG_01203	6417.41	0.819206	0.0965615	8.48378	2.18e-17	1.20356e-16
CNAG_01204	26319.7	-0.239259	0.095832	-2.49665	0.0125373	0.0192277
CNAG_01207	8228.36	-0.261058	0.0869097	-3.00378	0.00266647	0.0044773
CNAG_01208	10295.5	0.0541025	0.0836073	0.647103	0.517565	0.576227
CNAG_01209	6854.17	-0.213361	0.08832	-2.41577	0.0157018	0.0237396
CNAG_01210	364.171	0.96079	0.257117	3.73678	0.000186391	0.000363946
CNAG_01211	8367.67	-0.200284	0.0763314	-2.62387	0.00869363	0.0136371
CNAG_01212	3394.01	-1.11408	0.141387	-7.87968	3.28231e-15	1.57581e-14
CNAG_01213	3795.44	-0.199137	0.110772	-1.79772	0.0722207	0.0979902
CNAG_01214	3875.99	0.451011	0.0735379	6.13304	8.62172e-10	2.79987e-09
CNAG_01215	5439.5	0.0680461	0.159237	0.427327	0.669142	0.718449
CNAG_01216	22173.1	0.354757	0.0667658	5.31345	1.07568e-07	2.90478e-07
CNAG_01217	5956.66	0.069882	0.0842676	0.829286	0.406943	0.467056
CNAG_01220	1765.7	-0.0131541	0.0803702	-0.163669	0.869991	0.8963
CNAG_01221	2893.83	-0.304499	0.115647	-2.63299	0.00846361	0.0133013
CNAG_01222	4861.42	-0.370511	0.0912093	-4.0622	4.8612e-05	0.000100836
CNAG_01223	4549.56	-0.401278	0.0865884	-4.63432	3.58117e-06	8.39543e-06
CNAG_01224	59375.3	0.429136	0.0755817	5.67778	1.36454e-08	4.0074e-08
CNAG_01228	3594.68	0.473368	0.071349	6.63454	3.2551e-11	1.17801e-10
CNAG_01229	8139.54	-3.79341	0.136751	-27.7395	2.33447e-169	3.8084e-167
CNAG_01230	343685	3.84993	0.0690285	55.7731	0	0
CNAG_01231	12140.1	-0.306584	0.0721227	-4.25087	2.12945e-05	4.59147e-05
CNAG_01232	27198.8	-1.03814	0.0866829	-11.9763	4.73237e-33	6.00203e-32
CNAG_01233	10542.8	0.07735	0.103489	0.747422	0.454809	0.514761
CNAG_01234	7343.5	-0.440781	0.104719	-4.20917	2.56314e-05	5.47083e-05
CNAG_01235	16132.4	0.180271	0.0691945	2.60528	0.00917984	0.0143537
CNAG_01236	16120.5	0.972029	0.0997695	9.74275	1.98118e-22	1.47966e-21
CNAG_01237	1428.23	-0.106395	0.132791	-0.80122	0.423004	0.4835
CNAG_01238	8781.15	0.980887	0.111537	8.79424	1.44018e-18	8.62657e-18
CNAG_01239	8968.9	1.51691	0.093346	16.2504	2.21955e-59	6.05463e-58
CNAG_01240	5405.29	-0.674852	0.0796627	-8.47137	2.42517e-17	1.33625e-16
CNAG_01241	3770.41	0.487804	0.108723	4.48668	7.23425e-06	1.64316e-05
CNAG_01242	17790.3	-0.165543	0.148146	-1.11743	0.263811	0.318241
CNAG_01243	10884	0.423279	0.0708871	5.97118	2.35543e-09	7.39796e-09
CNAG_01244	1885.34	-0.311654	0.166902	-1.86729	0.0618606	0.0849167
CNAG_01245	6425.32	0.816932	0.0708911	11.5238	1.00147e-30	1.14612e-29
CNAG_01246	5840.22	0.369966	0.0723147	5.11606	3.11989e-07	8.1016e-07
CNAG_01247	3704.99	-0.0545239	0.0966418	-0.564186	0.572627	0.628613
CNAG_01248	7246.71	0.00727129	0.0663823	0.109537	0.912777	0.932503
CNAG_01249	3777.3	0.307844	0.0539981	5.70101	1.19102e-08	3.52018e-08
CNAG_01250	6381.23	0.823193	0.111363	7.39195	1.44686e-13	6.22435e-13
CNAG_01251	14980	-0.0831787	0.0772743	-1.07641	0.281745	0.338061
CNAG_01252	1595.06	-1.84347	0.161491	-11.4153	3.50735e-30	3.90123e-29
CNAG_01253	7105.05	0.207885	0.0650973	3.19346	0.0014058	0.00245513
CNAG_01254	2987.13	0.0223701	0.0799999	0.279626	0.779764	0.817392
CNAG_01255	32788.2	-0.5796	0.0650686	-8.90752	5.21886e-19	3.22832e-18
CNAG_01256	2237.18	-0.291414	0.0961454	-3.03097	0.00243771	0.00411979
CNAG_01257	6531.97	-3.61375	0.118686	-30.4481	1.27014e-203	3.01931e-201
CNAG_01258	17039	0.545793	0.0945882	5.7702	7.91792e-09	2.37309e-08
CNAG_01261	20575	-1.26453	0.130051	-9.72333	2.39796e-22	1.78134e-21
CNAG_01262	3781.96	0.387803	0.0980013	3.95712	7.58581e-05	0.000154012
CNAG_01263	29928.2	0.625859	0.1312	4.77027	1.83981e-06	4.45236e-06
CNAG_01264	7605.69	0.17135	0.130565	1.31237	0.189394	0.237063
CNAG_01265	1904.16	-1.13191	0.095626	-11.8368	2.51794e-32	3.09442e-31
CNAG_01266	10258.4	0.193703	0.0646407	2.99661	0.00273	0.00457808
CNAG_01267	1101.1	0.990899	0.124885	7.93447	2.11392e-15	1.03094e-14
CNAG_01268	501.179	0.384263	0.204469	1.87932	0.0602012	0.0828713
CNAG_01270	17196	0.0142108	0.0642352	0.221231	0.824913	0.856945
CNAG_01271	4636.12	-0.00847495	0.0780566	-0.108574	0.91354	0.933164
CNAG_01272	106209	3.16027	0.102942	30.6997	5.74835e-207	1.44928e-204
CNAG_01273	15650.9	0.325622	0.0742029	4.38827	1.14255e-05	2.54553e-05
CNAG_01274	17450.2	-0.362588	0.0663342	-5.46607	4.60114e-08	1.29024e-07
CNAG_01275	8213.6	0.649439	0.0947677	6.85296	7.23386e-12	2.76462e-11
CNAG_01276	18062.9	0.643592	0.110345	5.83252	5.45975e-09	1.66027e-08
CNAG_01277	46348.6	-0.793109	0.0701554	-11.305	1.23925e-29	1.34603e-28
CNAG_01278	27640.3	0.387226	0.0795615	4.86699	1.13308e-06	2.79409e-06
CNAG_01279	7238.44	-0.594685	0.0663066	-8.96871	2.99998e-19	1.87386e-18
CNAG_01281	7794.7	0.478362	0.086481	5.53142	3.17658e-08	9.04178e-08
CNAG_01282	7291.77	0.187047	0.0655753	2.85239	0.00433913	0.00707744
CNAG_01283	18330.6	0.350876	0.0963098	3.6432	0.000269267	0.000514657
CNAG_01284	14293.1	0.257179	0.0691083	3.72139	0.00019813	0.000385511
CNAG_01285	4299.5	-0.393838	0.0986533	-3.99215	6.54781e-05	0.000133786
CNAG_01286	1162.71	0.710114	0.130012	5.46191	4.71031e-08	1.31996e-07
CNAG_01287	7451.81	-0.746559	0.110523	-6.75479	1.43038e-11	5.31285e-11
CNAG_01288	8143.95	1.38931	0.136758	10.1589	3.02565e-24	2.49139e-23
CNAG_01289	3066	0.620513	0.0827346	7.50004	6.37991e-14	2.84921e-13
CNAG_01290	776.09	0.337236	0.146519	2.30165	0.0213548	0.0316198
CNAG_01291	5436.66	-0.0452035	0.0886293	-0.510029	0.610031	0.662679
CNAG_01292	8525.92	0.280092	0.0782879	3.57772	0.000346605	0.00065332
CNAG_01293	8021.85	-0.602888	0.111901	-5.38769	7.13693e-08	1.96295e-07
CNAG_01294	7381.04	0.201901	0.0653897	3.08766	0.00201737	0.00345218
CNAG_01295	3226.3	-0.0760914	0.103756	-0.73337	0.463333	0.523057
CNAG_01296	8768.82	1.32433	0.162432	8.15309	3.54746e-16	1.82191e-15
CNAG_01297	9892.3	0.314608	0.0755561	4.16389	3.12867e-05	6.61682e-05
CNAG_01298	14847.1	0.31079	0.0792323	3.92252	8.76267e-05	0.000176955
CNAG_01299	1055.33	0.0141394	0.175346	0.0806368	0.935731	0.951103
CNAG_01300	17881.3	0.464903	0.119698	3.88398	0.000102762	0.000205969
CNAG_01301	5044.61	-0.117653	0.0631342	-1.86354	0.0623864	0.0855679
CNAG_01302	2374.82	0.122817	0.11907	1.03147	0.302319	0.359688
CNAG_01303	4990.61	0.278562	0.0896368	3.10768	0.00188562	0.0032394
CNAG_01304	6386.37	0.758594	0.0866847	8.75119	2.11117e-18	1.24751e-17
CNAG_01305	8528.88	1.06698	0.0862694	12.368	3.89485e-35	5.36509e-34
CNAG_01306	4777.07	0.68942	0.0945724	7.28986	3.10268e-13	1.30375e-12
CNAG_01307	11281.3	-0.172307	0.0690509	-2.49537	0.0125826	0.0192865
CNAG_01308	9112.26	0.0413252	0.085457	0.483578	0.628685	0.680537
CNAG_01309	4045.84	0.18632	0.0921813	2.02123	0.0432561	0.0610708
CNAG_01310	5678.25	1.79772	0.172025	10.4504	1.45985e-25	1.29764e-24
CNAG_01313	9927.73	-0.720663	0.0909331	-7.92519	2.2779e-15	1.10379e-14
CNAG_01314	26103.2	-0.333085	0.0744587	-4.47342	7.69792e-06	1.74609e-05
CNAG_01315	4922.06	0.271428	0.0817118	3.32178	0.000894464	0.00160521
CNAG_01316	4772.62	0.114091	0.10732	1.06309	0.287743	0.344513
CNAG_01317	2442.29	0.512276	0.109104	4.69531	2.662e-06	6.32796e-06
CNAG_01318	9118.73	-0.932476	0.0614767	-15.168	5.76386e-52	1.28223e-50
CNAG_01319	2999.81	0.0514961	0.0922637	0.558141	0.576748	0.632303
CNAG_01320	5208.31	0.426301	0.0857708	4.97023	6.68745e-07	1.68861e-06
CNAG_01321	16035	-0.302286	0.113343	-2.667	0.0076531	0.0121076
CNAG_01322	8417.24	-0.0810039	0.0701025	-1.15551	0.247883	0.301342
CNAG_01323	8269.83	-0.398599	0.0974294	-4.09115	4.2923e-05	8.94588e-05
CNAG_01324	2409.89	0.0672993	0.0826008	0.814754	0.415213	0.47564
CNAG_01325	1658.88	0.123749	0.1184	1.04518	0.295939	0.353005
CNAG_01330	5355.24	0.237686	0.0815924	2.91309	0.00357876	0.00590195
CNAG_01331	3880.95	-1.71531	0.0970176	-17.6804	5.94252e-70	1.99362e-68
CNAG_01332	38823.6	0.565317	0.0797859	7.08542	1.38626e-12	5.57724e-12
CNAG_01333	2932.58	-0.15569	0.127901	-1.21727	0.223501	0.274591
CNAG_01334	9448.12	-0.192757	0.112045	-1.72035	0.0853681	0.114356
CNAG_01335	8339.94	-0.141944	0.0954849	-1.48656	0.137131	0.176587
CNAG_01336	1737.39	-0.440058	0.0963441	-4.56756	4.93429e-06	1.14005e-05
CNAG_01337	2544.19	-1.06204	0.122519	-8.66838	4.38297e-18	2.53767e-17
CNAG_01338	3961.05	-0.24952	0.146145	-1.70734	0.0877584	0.117237
CNAG_01339	6010.8	-0.0460669	0.0771154	-0.597376	0.550257	0.608067
CNAG_01340	12026.5	-0.167451	0.070387	-2.379	0.0173596	0.0260379
CNAG_01341	15156.3	1.45165	0.171862	8.44662	2.99859e-17	1.64242e-16
CNAG_01342	4392.35	-0.135969	0.102194	-1.3305	0.183355	0.230197
CNAG_01343	1981.09	-0.375191	0.12337	-3.0412	0.0023564	0.00398967
CNAG_01344	12346.2	1.23947	0.139498	8.88526	6.37712e-19	3.91859e-18
CNAG_01345	2809.61	0.932464	0.100166	9.30922	1.2877e-20	8.67503e-20
CNAG_01346	3062.33	0.265738	0.091338	2.90939	0.00362136	0.00596864
CNAG_01347	9546.32	-0.357963	0.0683337	-5.23846	1.61924e-07	4.31105e-07
CNAG_01348	19640	0.278946	0.105891	2.63427	0.00843174	0.0132563
CNAG_01349	456.336	-1.55983	0.203216	-7.67575	1.64455e-14	7.59303e-14
CNAG_01350	4382.7	0.218459	0.0916095	2.38468	0.0170941	0.0256766
CNAG_01351	8110.07	-0.480248	0.0721387	-6.65729	2.78922e-11	1.01471e-10
CNAG_01352	6531.88	0.110626	0.0774199	1.42891	0.153031	0.195338
CNAG_01353	3872.41	1.18152	0.176162	6.70699	1.98682e-11	7.29494e-11
CNAG_01354	7386.96	-0.0113602	0.185995	-0.061078	0.951297	0.9617
CNAG_01355	4358.4	-0.258383	0.108147	-2.38918	0.016886	0.025387
CNAG_01356	6254.52	-0.0224947	0.0734423	-0.306291	0.759383	0.799755
CNAG_01357	4360.66	-0.138461	0.0881293	-1.57111	0.116158	0.151526
CNAG_01358	1062.08	-2.05444	0.151815	-13.5326	1.00472e-41	1.73429e-40
CNAG_01359	11741	0.67408	0.110342	6.109	1.00259e-09	3.2344e-09
CNAG_01360	12182.6	0.183961	0.0797789	2.30589	0.0211169	0.0312955
CNAG_01361	24286.3	1.16919	0.0758437	15.4158	1.28155e-53	2.94544e-52
CNAG_01362	10650.2	-0.151654	0.0677839	-2.23731	0.0252658	0.0370939
CNAG_01363	7484.32	0.516258	0.0753731	6.84937	7.41744e-12	2.82958e-11
CNAG_01364	6810.68	-0.339314	0.0621563	-5.45906	4.78675e-08	1.34048e-07
CNAG_01365	2828.69	-0.010215	0.0838931	-0.121763	0.903087	0.92442
CNAG_01367	11267.4	-1.38148	0.086101	-16.0449	6.20345e-58	1.63331e-56
CNAG_01368	101.657	-0.536865	0.360925	-1.48747	0.136891	0.176305
CNAG_01369	526.876	-0.655386	0.153361	-4.27348	1.92442e-05	4.17283e-05
CNAG_01370	734.979	-0.986153	0.154214	-6.39469	1.6087e-10	5.51706e-10
CNAG_01371	4653.05	-0.385902	0.0775817	-4.97414	6.55392e-07	1.6564e-06
CNAG_01372	5144.96	-0.819184	0.0974542	-8.40584	4.24823e-17	2.30563e-16
CNAG_01373	7089.78	-0.201015	0.0664926	-3.02311	0.00250188	0.00421796
CNAG_01375	5545.6	-0.594971	0.117269	-5.07357	3.90412e-07	1.00533e-06
CNAG_01376	20273.7	0.00991468	0.0682329	0.145306	0.884469	0.908336
CNAG_01377	8696.96	0.0810053	0.0779495	1.0392	0.29871	0.356056
CNAG_01378	9162.46	-0.687563	0.0717379	-9.58438	9.3016e-22	6.68879e-21
CNAG_01379	6007.23	0.41711	0.144166	2.89326	0.00381267	0.00626164
CNAG_01380	3597.13	0.122582	0.0910525	1.34627	0.178214	0.224216
CNAG_01381	3801.63	0.459196	0.0676668	6.78613	1.15177e-11	4.31492e-11
CNAG_01382	1748.19	0.161604	0.104	1.55388	0.120213	0.156326
CNAG_01383	75.7741	-0.313051	0.285476	-1.09659	0.272821	0.32811
CNAG_01384	2803.18	0.130905	0.124562	1.05092	0.293293	0.350201
CNAG_01385	10068.9	-0.15889	0.0767786	-2.06946	0.0385028	0.0549473
CNAG_01386	1680.04	-0.826436	0.1294	-6.3867	1.69502e-10	5.8059e-10
CNAG_01387	4065.22	-1.44124	0.111555	-12.9195	3.49472e-38	5.31555e-37
CNAG_01388	5215.32	-0.245863	0.0829107	-2.9654	0.0030229	0.0050281
CNAG_01389	1945.88	-0.877194	0.156723	-5.59711	2.17961e-08	6.29009e-08
CNAG_01390	5882.35	0.905646	0.114635	7.90025	2.78334e-15	1.3409e-14
CNAG_01391	4479.71	0.497708	0.0887515	5.60788	2.04823e-08	5.92947e-08
CNAG_01392	1471.93	0.303883	0.114208	2.66079	0.00779567	0.0123261
CNAG_01395	5309.86	-0.106549	0.0857515	-1.24253	0.21404	0.264529
CNAG_01396	3197.96	0.220458	0.133746	1.64833	0.0992842	0.131202
CNAG_01397	10139.6	1.11477	0.110107	10.1244	4.30512e-24	3.51163e-23
CNAG_01398	13406	0.967136	0.108796	8.88946	6.14081e-19	3.77896e-18
CNAG_01399	1522.38	-0.237973	0.111228	-2.13951	0.0323942	0.0467349
CNAG_01400	10454.3	0.933831	0.0914305	10.2136	1.72426e-24	1.44325e-23
CNAG_01401	1352.47	-0.32982	0.149478	-2.20647	0.0273508	0.0399858
CNAG_01402	10398	-0.371514	0.0631091	-5.88685	3.93635e-09	1.21388e-08
CNAG_01403	3155.43	-0.129509	0.122324	-1.05874	0.28972	0.346481
CNAG_01404	23188.3	0.611301	0.0880732	6.94082	3.89823e-12	1.52198e-11
CNAG_01405	9234.5	0.590167	0.0583145	10.1204	4.4853e-24	3.65502e-23
CNAG_01406	4135.9	-0.0713731	0.0675867	-1.05602	0.290958	0.347762
CNAG_01408	4089.49	0.203692	0.0799533	2.54763	0.0108457	0.0167851
CNAG_01411	3470.28	-0.249099	0.109035	-2.28458	0.0223374	0.032976
CNAG_01412	10739.9	-0.869898	0.0679474	-12.8025	1.58718e-37	2.36488e-36
CNAG_01413	17266	0.3588	0.0711126	5.04552	4.52291e-07	1.15715e-06
CNAG_01414	5833.05	-0.565403	0.0898754	-6.29097	3.15495e-10	1.06057e-09
CNAG_01415	3835.73	0.210727	0.0853915	2.46777	0.0135957	0.0207362
CNAG_01416	2229.29	0.266902	0.0856915	3.11468	0.00184143	0.00317265
CNAG_01417	7552.78	-0.906288	0.122625	-7.39074	1.46015e-13	6.27501e-13
CNAG_01418	3441.11	-0.749406	0.134102	-5.58832	2.29271e-08	6.60276e-08
CNAG_01419	14132.7	-1.70078	0.0896733	-18.9664	3.2348e-80	1.2816e-78
CNAG_01420	7563.91	-0.576487	0.0912263	-6.3193	2.62747e-10	8.89724e-10
CNAG_01421	20978.4	0.712514	0.0924523	7.70683	1.28984e-14	6.01201e-14
CNAG_01422	8101.68	-0.75096	0.091846	-8.17629	2.92719e-16	1.51268e-15
CNAG_01423	5656.52	-0.169247	0.0832499	-2.033	0.0420523	0.0595329
CNAG_01424	4884.74	-0.859598	0.0889475	-9.6641	4.28378e-22	3.12641e-21
CNAG_01425	754.492	-0.480657	0.143237	-3.35568	0.000791702	0.0014307
CNAG_01426	7067.55	0.167317	0.0915307	1.82799	0.0675509	0.092135
CNAG_01428	60078.7	-0.0510015	0.0815054	-0.625743	0.531483	0.590143
CNAG_01429	1064.1	0.425838	0.111154	3.83107	0.000127585	0.000253888
CNAG_01430	4913.36	-0.401047	0.103769	-3.86479	0.000111184	0.000222581
CNAG_01431	2071.04	0.5808	0.107937	5.38092	7.41068e-08	2.03287e-07
CNAG_01432	9602.88	0.911683	0.119035	7.65895	1.87455e-14	8.63103e-14
CNAG_01435	12793.5	0.343441	0.0893437	3.84404	0.000121023	0.000241407
CNAG_01436	3541.14	0.146112	0.0596788	2.44831	0.0143529	0.0218031
CNAG_01437	9649.8	1.483	0.116375	12.7433	3.39749e-37	4.97661e-36
CNAG_01438	8694.33	0.780095	0.122804	6.35235	2.12055e-10	7.21595e-10
CNAG_01439	4461.75	0.873006	0.0707379	12.3414	5.41987e-35	7.42889e-34
CNAG_01440	1805.1	-0.311116	0.138395	-2.24802	0.0245747	0.0361303
CNAG_01441	10726.1	0.46513	0.10891	4.27079	1.94786e-05	4.21816e-05
CNAG_01442	9945.2	0.646129	0.0799192	8.08478	6.22774e-16	3.15559e-15
CNAG_01443	1842.55	0.425506	0.130646	3.25695	0.00112618	0.00199272
CNAG_01444	2571.07	0.519213	0.0743211	6.98607	2.82688e-12	1.11099e-11
CNAG_01445	2910.99	-0.259519	0.104653	-2.47979	0.0131459	0.0201019
CNAG_01446	66202.4	1.39322	0.260222	5.35397	8.60436e-08	2.34793e-07
CNAG_01448	3648.75	0.573606	0.0792574	7.23725	4.5787e-13	1.89904e-12
CNAG_01451	2330.92	0.119165	0.209194	0.569641	0.568921	0.625122
CNAG_01452	3906.4	-0.59713	0.117274	-5.09177	3.5474e-07	9.1631e-07
CNAG_01454	24579.7	0.353484	0.0740969	4.77056	1.83715e-06	4.44721e-06
CNAG_01455	27749.3	0.464903	0.140038	3.31985	0.00090067	0.0016143
CNAG_01456	743.623	-0.888176	0.137013	-6.48244	9.02524e-11	3.15637e-10
CNAG_01457	5596.96	0.191528	0.0841583	2.2758	0.0228578	0.0337013
CNAG_01461	4786.59	0.218916	0.0843235	2.59615	0.00942749	0.0146995
CNAG_01463	2486.81	-0.324055	0.0946017	-3.42546	0.00061375	0.00112451
CNAG_01464	1165.75	-1.68616	0.225416	-7.48022	7.41973e-14	3.29238e-13
CNAG_01465	2770.86	-0.0933868	0.0879096	-1.0623	0.288098	0.344888
CNAG_01466	9313.98	2.19994	0.103658	21.223	5.8602e-100	3.29438e-98
CNAG_01467	8665.18	1.81394	0.0855537	21.2023	9.09009e-100	5.07581e-98
CNAG_01468	1438.35	-0.310768	0.227942	-1.36337	0.172767	0.218155
CNAG_01469	5963.91	-0.190081	0.0902901	-2.10522	0.0352722	0.0506497
CNAG_01470	2142.28	-0.851546	0.161942	-5.25834	1.45362e-07	3.88129e-07
CNAG_01471	1940.72	-0.106255	0.148983	-0.713202	0.475721	0.535009
CNAG_01472	4880.48	0.0661604	0.0739918	0.894158	0.371237	0.43006
CNAG_01473	2255.53	0.692571	0.123956	5.58725	2.30689e-08	6.64128e-08
CNAG_01474	2268.88	1.62843	0.131199	12.4119	2.25147e-35	3.14828e-34
CNAG_01475	18842.1	-0.0321164	0.0715479	-0.448879	0.653519	0.704037
CNAG_01476	12134.3	-0.452832	0.104655	-4.32691	1.51216e-05	3.31957e-05
CNAG_01477	12830.6	1.13966	0.0744345	15.3109	6.46206e-53	1.46897e-51
CNAG_01478	2323.41	0.0358383	0.116114	0.308649	0.757589	0.797967
CNAG_01479	758.061	-0.136586	0.152009	-0.898541	0.368897	0.427647
CNAG_01480	34861.7	0.110658	0.0969228	1.14171	0.253574	0.307317
CNAG_01481	1992.98	-0.971651	0.129737	-7.48939	6.91968e-14	3.0787e-13
CNAG_01482	7385.29	0.276253	0.0810634	3.40786	0.000654746	0.00119751
CNAG_01483	5168.8	-0.024074	0.0828723	-0.290496	0.771437	0.810296
CNAG_01485	5718.29	-0.455248	0.0943585	-4.82467	1.40238e-06	3.42465e-06
CNAG_01486	49551.8	0.275954	0.0865319	3.18905	0.00142743	0.00249029
CNAG_01487	2338.23	-0.287465	0.102595	-2.80193	0.00507975	0.00820492
CNAG_01489	3963.64	-3.06792	0.112728	-27.2152	4.29768e-163	6.2731e-161
CNAG_01490	2686.74	1.02582	0.180471	5.6841	1.31505e-08	3.873e-08
CNAG_01491	2349.19	0.0899189	0.0841257	1.06886	0.285131	0.341829
CNAG_01492	20724.8	0.870193	0.0769994	11.3013	1.29304e-29	1.40262e-28
CNAG_01493	2736.82	-0.0706237	0.164351	-0.429713	0.667404	0.716676
CNAG_01494	5206.25	-0.745985	0.0605854	-12.313	7.71504e-35	1.05056e-33
CNAG_01495	5242.04	-2.24907	0.0741243	-30.3419	3.2127e-202	7.42491e-200
CNAG_01496	4072.23	0.415438	0.0967082	4.29579	1.74075e-05	3.79435e-05
CNAG_01497	1333.33	0.458952	0.109421	4.19435	2.7365e-05	5.82294e-05
CNAG_01498	2654.87	1.03196	0.124317	8.30104	1.03208e-16	5.49035e-16
CNAG_01499	2747.54	0.237287	0.091887	2.58237	0.00981234	0.0152624
CNAG_01500	70.6994	1.59677	0.40346	3.95769	7.5677e-05	0.000153681
CNAG_01501	2492.59	0.235889	0.128173	1.8404	0.0657102	0.0897273
CNAG_01502	5214.39	-1.12015	0.0945604	-11.8459	2.26067e-32	2.78648e-31
CNAG_01504	3287.7	-0.294704	0.0965314	-3.05293	0.00226615	0.0038447
CNAG_01506	11526.6	0.395918	0.0777096	5.09484	3.49028e-07	9.02396e-07
CNAG_01507	2075.84	0.783148	0.148851	5.2613	1.43044e-07	3.82432e-07
CNAG_01508	7090.83	-0.189254	0.0728711	-2.59711	0.00940118	0.0146613
CNAG_01509	3087.75	0.38857	0.0860453	4.51588	6.3055e-06	1.44126e-05
CNAG_01510	10569.8	0.284831	0.076912	3.70333	0.000212785	0.00041229
CNAG_01511	1088.86	-1.23628	0.156088	-7.92046	2.36634e-15	1.14532e-14
CNAG_01512	3592.28	-0.262482	0.11207	-2.34213	0.0191743	0.0285999
CNAG_01513	1488.24	-0.318129	0.0852169	-3.73317	0.000189084	0.000369031
CNAG_01514	27.1619	-1.69662	0.489273	-3.46763	0.000525063	0.000969061
CNAG_01518	1277.17	0.143717	0.104405	1.37653	0.168659	0.213323
CNAG_01519	2835.49	-0.945979	0.106372	-8.8931	5.94247e-19	3.65961e-18
CNAG_01520	4924.71	0.034668	0.0672306	0.515659	0.606093	0.659003
CNAG_01521	1764.37	-0.740659	0.139011	-5.32806	9.92671e-08	2.69375e-07
CNAG_01522	6409.77	0.406629	0.0837526	4.85512	1.20312e-06	2.95889e-06
CNAG_01523	12824.6	0.199029	0.0623206	3.19363	0.00140494	0.00245415
CNAG_01524	6685	-0.232798	0.0862643	-2.69866	0.00696197	0.0110668
CNAG_01525	3219.61	-0.720943	0.096751	-7.45153	9.22625e-14	4.05292e-13
CNAG_01526	9692.3	-0.58019	0.121336	-4.78168	1.73832e-06	4.21779e-06
CNAG_01527	456.64	0.775678	0.141609	5.47759	4.31152e-08	1.21107e-07
CNAG_01528	4235.37	1.21986	0.0916215	13.3141	1.91589e-40	3.10725e-39
CNAG_01529	2052.39	-1.42314	0.0901341	-15.7892	3.69441e-56	9.09394e-55
CNAG_01530	12868.5	0.300159	0.101595	2.95446	0.00313215	0.0051963
CNAG_01531	4547.83	-0.778473	0.0954326	-8.15731	3.42563e-16	1.76369e-15
CNAG_01532	40180.8	-3.01883	0.0541304	-55.7696	0	0
CNAG_01533	12886	-0.894664	0.0760243	-11.7681	5.69705e-32	6.92975e-31
CNAG_01534	2731.76	1.43952	0.203311	7.08037	1.43773e-12	5.77593e-12
CNAG_01535	8062.75	0.325238	0.108326	3.00239	0.00267865	0.00449684
CNAG_01536	10367.6	0.47791	0.0925992	5.16106	2.45562e-07	6.4491e-07
CNAG_01537	12972.5	-0.293539	0.0713546	-4.1138	3.89191e-05	8.14813e-05
CNAG_01538	4823.66	-0.0311415	0.0939676	-0.331406	0.740338	0.78128
CNAG_01539	33598.2	2.17055	0.129886	16.7111	1.0875e-62	3.17472e-61
CNAG_01540	4124.7	-3.43222	0.12421	-27.6323	4.54979e-168	7.14231e-166
CNAG_01541	978.991	-2.43795	0.165251	-14.7531	2.93991e-49	6.14574e-48
CNAG_01542	13395.7	-0.746239	0.128555	-5.80482	6.44344e-09	1.94873e-08
CNAG_01543	3637.98	-0.816402	0.109748	-7.43886	1.01561e-13	4.44729e-13
CNAG_01544	6259.11	0.472067	0.0759633	6.21441	5.15183e-10	1.70702e-09
CNAG_01545	3100.25	-0.682926	0.0957092	-7.13543	9.64829e-13	3.91962e-12
CNAG_01546	1552.84	1.461	0.167489	8.72298	2.70981e-18	1.5922e-17
CNAG_01547	6908.38	-0.24853	0.0868121	-2.86285	0.00419853	0.00686687
CNAG_01548	9008.39	0.209804	0.0800423	2.62117	0.00876285	0.0137405
CNAG_01549	6358.94	0.321409	0.0682089	4.71212	2.45151e-06	5.8594e-06
CNAG_01550	4094.84	0.789217	0.11745	6.71962	1.82197e-11	6.71338e-11
CNAG_01551	27830.5	-1.29578	0.124481	-10.4095	2.24447e-25	1.96983e-24
CNAG_01552	12612.5	0.418662	0.0615155	6.80581	1.00485e-11	3.79153e-11
CNAG_01553	33374.5	-2.7369	0.0974037	-28.0985	1.02274e-173	1.81046e-171
CNAG_01554	5094.92	-0.605148	0.0887272	-6.82032	9.08367e-12	3.43684e-11
CNAG_01555	695.904	-2.18071	0.181784	-11.9962	3.72211e-33	4.74969e-32
CNAG_01556	14221.3	-1.98117	0.0736291	-26.9075	1.79454e-159	2.29702e-157
CNAG_01557	24985.9	0.3851	0.0857379	4.49159	7.06925e-06	1.60788e-05
CNAG_01558	40306.9	0.347517	0.141634	2.45363	0.0141424	0.0215109
CNAG_01559	8155.52	0.285862	0.0898117	3.1829	0.00145806	0.00254
CNAG_01560	1284.05	-0.706647	0.123012	-5.74454	9.21736e-09	2.75066e-08
CNAG_01561	6973.12	-0.178109	0.0918154	-1.93986	0.0523971	0.07273
CNAG_01562	712644	3.38623	0.0702128	48.2281	0	0
CNAG_01563	7353.91	0.394977	0.0624076	6.32899	2.46766e-10	8.37314e-10
CNAG_01564	10565.6	0.798241	0.120416	6.62901	3.37941e-11	1.22246e-10
CNAG_01565	12049.4	-0.210437	0.0723901	-2.90698	0.00364932	0.00601115
CNAG_01566	3463.01	0.264256	0.135125	1.95563	0.0505086	0.070367
CNAG_01567	1661.51	-0.184209	0.141317	-1.30351	0.1924	0.240352
CNAG_01568	9471.51	0.111634	0.0945593	1.18058	0.237771	0.290152
CNAG_01569	2049.19	-0.0653754	0.101857	-0.641837	0.520979	0.579485
CNAG_01570	464.273	-0.200623	0.175989	-1.13998	0.254296	0.308103
CNAG_01571	7949.32	-0.0760092	0.0614594	-1.23674	0.216184	0.266863
CNAG_01572	5075.22	-0.645209	0.113488	-5.68528	1.30597e-08	3.84761e-08
CNAG_01573	16013.7	0.636945	0.138463	4.6001	4.22285e-06	9.82497e-06
CNAG_01574	28267.1	1.34951	0.107668	12.534	4.86512e-36	6.86064e-35
CNAG_01575	19876.8	-0.0734512	0.087828	-0.836307	0.402982	0.462904
CNAG_01576	9779.67	0.762428	0.0939386	8.11623	4.80873e-16	2.45151e-15
CNAG_01577	90657.3	1.58929	0.101487	15.66	2.8368e-55	6.90122e-54
CNAG_01578	6755.58	0.0806643	0.108036	0.746641	0.45528	0.515154
CNAG_01579	4842.78	0.153688	0.0890512	1.72583	0.0843775	0.113138
CNAG_01580	8565.73	-0.18555	0.0567283	-3.27086	0.00107222	0.00190414
CNAG_01581	519.579	-0.440631	0.193768	-2.27402	0.0229649	0.0338472
CNAG_01582	1023.83	-0.272116	0.104053	-2.61517	0.0089183	0.0139737
CNAG_01583	6979.22	-0.340357	0.0680571	-5.00104	5.70211e-07	1.44683e-06
CNAG_01584	3709.23	-1.28596	0.158636	-8.10636	5.21591e-16	2.65259e-15
CNAG_01585	4893.36	0.521807	0.175651	2.9707	0.00297126	0.00494516
CNAG_01586	20608	0.266801	0.0490467	5.43973	5.33616e-08	1.48683e-07
CNAG_01587	3916.49	-0.0611514	0.0920915	-0.664028	0.506672	0.565765
CNAG_01588	59805.8	0.489202	0.150698	3.24624	0.00116939	0.00206305
CNAG_01590	1397.65	0.102617	0.104508	0.981903	0.326148	0.384464
CNAG_01591	5159.02	0.0909848	0.0684084	1.33002	0.18351	0.230357
CNAG_01592	512.402	1.14187	0.160149	7.13007	1.00321e-12	4.07355e-12
CNAG_01593	13007.2	1.22112	0.117723	10.3727	3.29896e-25	2.87106e-24
CNAG_01594	26148.8	0.533801	0.0728161	7.3308	2.28778e-13	9.71138e-13
CNAG_01595	3492.35	0.693884	0.0782922	8.86275	7.80641e-19	4.74776e-18
CNAG_01596	2934.61	0.517418	0.108953	4.74899	2.04434e-06	4.92298e-06
CNAG_01597	1963.02	0.427832	0.127219	3.36296	0.000771111	0.00139683
CNAG_01598	6038.81	0.802811	0.0896101	8.95893	3.27844e-19	2.04166e-18
CNAG_01599	2215.3	0.472542	0.108888	4.33969	1.42683e-05	3.14053e-05
CNAG_01600	8474.54	0.871993	0.136258	6.39955	1.55832e-10	5.35089e-10
CNAG_01601	7446.9	-2.59329	0.13141	-19.7344	1.09284e-86	4.76044e-85
CNAG_01602	11720	-1.39958	0.0765537	-18.2824	1.14288e-74	4.0986e-73
CNAG_01603	25985	0.559278	0.103301	5.41408	6.16047e-08	1.70509e-07
CNAG_01604	2819.04	-1.75884	0.149279	-11.7822	4.82122e-32	5.89024e-31
CNAG_01605	6946.76	-0.913919	0.103645	-8.81778	1.1675e-18	7.02866e-18
CNAG_01606	73.0188	-1.16854	0.283528	-4.12143	3.76529e-05	7.89495e-05
CNAG_01607	2120.83	-0.0390188	0.094954	-0.410923	0.681129	0.729812
CNAG_01608	9133.3	0.499825	0.119381	4.1868	2.82913e-05	6.00776e-05
CNAG_01609	3957.99	-0.6667	0.111715	-5.96784	2.40413e-09	7.54236e-09
CNAG_01610	5373.82	-1.26715	0.171117	-7.40518	1.30968e-13	5.66938e-13
CNAG_01611	22901.8	-0.668558	0.0704942	-9.48386	2.4504e-21	1.71178e-20
CNAG_01612	1603.99	-0.293029	0.0980581	-2.98832	0.00280519	0.00469413
CNAG_01613	10527.2	0.0311839	0.0808395	0.385751	0.699681	0.745944
CNAG_01614	3210.23	-0.720837	0.0973179	-7.40704	1.29153e-13	5.60248e-13
CNAG_01615	1432.67	-0.416102	0.168958	-2.46276	0.0137872	0.0210014
CNAG_01616	8619.25	0.253511	0.082219	3.08337	0.00204671	0.00349807
CNAG_01619	4557.55	0.470905	0.071503	6.58581	4.52421e-11	1.61968e-10
CNAG_01620	2703.69	0.123507	0.0812861	1.51942	0.128658	0.166527
CNAG_01621	72153.5	1.04198	0.118088	8.82371	1.10726e-18	6.6805e-18
CNAG_01622	1572.41	-0.214202	0.103231	-2.07497	0.037989	0.0542887
CNAG_01623	5061.21	1.00966	0.137606	7.33736	2.17849e-13	9.26163e-13
CNAG_01624	6951.67	0.0269259	0.0687398	0.391708	0.695274	0.742201
CNAG_01625	3828.14	1.19865	0.0828462	14.4683	1.92124e-47	3.84247e-46
CNAG_01626	7557.75	-0.451864	0.0769356	-5.87328	4.27248e-09	1.3117e-08
CNAG_01627	1990.57	-1.47019	0.0849066	-17.3154	3.59911e-67	1.13427e-65
CNAG_01628	33052.1	0.351639	0.0846704	4.15304	3.28089e-05	6.92114e-05
CNAG_01629	2974.77	0.661521	0.120687	5.4813	4.22211e-08	1.18716e-07
CNAG_01630	4396.88	0.274226	0.0838154	3.27179	0.00106869	0.00189828
CNAG_01631	6498.38	0.63755	0.0655653	9.72388	2.38511e-22	1.77338e-21
CNAG_01632	2005.83	-0.86158	0.140084	-6.15046	7.72574e-10	2.51381e-09
CNAG_01633	4179.91	0.0870843	0.0699897	1.24424	0.21341	0.263868
CNAG_01634	13514.4	1.11568	0.118491	9.41572	4.69853e-21	3.24413e-20
CNAG_01635	4971.66	-0.969831	0.0897399	-10.8071	3.18453e-27	3.14671e-26
CNAG_01636	4072.09	0.497311	0.0909695	5.46679	4.58268e-08	1.2855e-07
CNAG_01637	7540.64	0.0172727	0.061313	0.281713	0.778164	0.815855
CNAG_01638	2622.16	-0.201851	0.101795	-1.98293	0.0473755	0.0662636
CNAG_01639	9656.93	2.34998	0.139304	16.8695	7.54036e-64	2.24057e-62
CNAG_01640	22202.1	0.221966	0.0688447	3.22416	0.00126345	0.00222097
CNAG_01641	18508.5	0.864237	0.110783	7.80121	6.13185e-15	2.90199e-14
CNAG_01642	13261.7	0.14043	0.0680562	2.06344	0.0390712	0.0556859
CNAG_01643	4055.31	-0.16979	0.106722	-1.59096	0.111619	0.146158
CNAG_01644	6221.08	-0.415017	0.067777	-6.12327	9.16733e-10	2.96664e-09
CNAG_01645	1505.55	0.29936	0.113679	2.63338	0.00845402	0.0132888
CNAG_01646	4383.63	0.456883	0.078414	5.82655	5.65858e-09	1.71885e-08
CNAG_01647	4731.7	-0.181445	0.0721833	-2.51367	0.0119484	0.0183889
CNAG_01648	30618.1	-0.646661	0.113791	-5.68286	1.32463e-08	3.89984e-08
CNAG_01649	9836.11	-0.0579805	0.0618097	-0.938048	0.34822	0.407538
CNAG_01650	5538.79	0.273362	0.11593	2.35799	0.0183743	0.0274608
CNAG_01651	1906.35	-0.906929	0.174873	-5.18622	2.14603e-07	5.65789e-07
CNAG_01652	11776.6	-0.330414	0.0696421	-4.74446	2.09065e-06	5.03015e-06
CNAG_01653	28086.1	-0.875875	0.145951	-6.00116	1.95916e-09	6.18369e-09
CNAG_01654	9319.74	0.335549	0.0964273	3.47982	0.000501758	0.000928107
CNAG_01655	8745	0.240829	0.0754867	3.19034	0.00142104	0.0024807
CNAG_01656	2087.38	-0.0393591	0.30244	-0.130139	0.896457	0.918876
CNAG_01657	12083	-0.380053	0.116156	-3.2719	0.00106825	0.0018979
CNAG_01658	7788.04	0.291291	0.0830579	3.50709	0.000453042	0.000842115
CNAG_01659	1981.8	0.225027	0.107841	2.08666	0.0369185	0.0528951
CNAG_01660	2762.81	0.19945	0.0603512	3.30482	0.000950359	0.00169678
CNAG_01663	2998.61	0.350704	0.145244	2.41459	0.0157528	0.0238123
CNAG_01664	9057.55	0.0493084	0.0951155	0.518406	0.604175	0.657176
CNAG_01665	2873.91	0.754151	0.140126	5.38194	7.36884e-08	2.02272e-07
CNAG_01666	1539.49	0.319054	0.172989	1.84437	0.0651299	0.0890081
CNAG_01667	4034.94	0.292108	0.0906042	3.224	0.00126412	0.00222168
CNAG_01668	2071.44	1.271	0.140712	9.03258	1.67674e-19	1.06411e-18
CNAG_01669	2466.77	0.766097	0.117866	6.49975	8.04523e-11	2.82313e-10
CNAG_01670	3583.86	0.427657	0.116673	3.66544	0.000246914	0.000474112
CNAG_01671	1098.92	-1.23134	0.124665	-9.87712	5.23132e-23	4.01889e-22
CNAG_01672	124.33	-1.34752	0.338074	-3.98587	6.72344e-05	0.000137206
CNAG_01673	6297.59	0.386236	0.0818703	4.71765	2.38579e-06	5.70889e-06
CNAG_01674	443.452	-0.381218	0.124267	-3.06773	0.00215688	0.0036743
CNAG_01675	4856.66	-0.475786	0.0837787	-5.67908	1.3542e-08	3.97986e-08
CNAG_01676	6382.62	1.17638	0.100507	11.7044	1.20948e-31	1.44581e-30
CNAG_01677	3674.52	-0.191948	0.0723146	-2.65435	0.00794608	0.0125448
CNAG_01678	13506.5	-0.177215	0.0862388	-2.05494	0.0398848	0.0567445
CNAG_01679	15123.9	0.706567	0.111769	6.32167	2.58746e-10	8.77249e-10
CNAG_01680	1152.95	-1.01299	0.112982	-8.96594	3.07639e-19	1.91871e-18
CNAG_01681	95061.9	-2.37171	0.118348	-20.0402	2.45966e-89	1.14326e-87
CNAG_01682	23312.9	0.366431	0.0855296	4.28426	1.83345e-05	3.98806e-05
CNAG_01683	48897.3	0.139708	0.0858792	1.62679	0.103782	0.136602
CNAG_01686	13895.6	-0.287413	0.0700412	-4.10349	4.06971e-05	8.50113e-05
CNAG_01687	10929.4	0.898135	0.130643	6.87471	6.2117e-12	2.38933e-11
CNAG_01688	10845.9	0.613283	0.107807	5.68872	1.27997e-08	3.77368e-08
CNAG_01689	981.307	-0.229072	0.107423	-2.13243	0.0329713	0.0475345
CNAG_01690	4960.08	-0.820306	0.0825854	-9.93282	2.99659e-23	2.3432e-22
CNAG_01691	6790.95	-0.406277	0.10433	-3.89414	9.85484e-05	0.000198193
CNAG_01692	6364.5	-0.750894	0.0817899	-9.18077	4.28006e-20	2.80174e-19
CNAG_01693	3381.74	0.462157	0.105776	4.36922	1.24689e-05	2.76275e-05
CNAG_01694	6122.43	0.298885	0.0788975	3.78827	0.000151699	0.000299298
CNAG_01695	2456.12	0.332656	0.0977189	3.40422	0.00066354	0.0012112
CNAG_01696	11146.2	0.976783	0.122641	7.96455	1.65832e-15	8.12559e-15
CNAG_01697	4744.86	0.19489	0.0695504	2.80215	0.0050764	0.00820136
CNAG_01698	10435.5	1.07754	0.10514	10.2486	1.20035e-24	1.0139e-23
CNAG_01699	4318.41	0.50732	0.0909041	5.58083	2.39375e-08	6.87944e-08
CNAG_01701	7225	-1.24779	0.0893339	-13.9677	2.45522e-44	4.48955e-43
CNAG_01702	11397.9	-0.28821	0.0809427	-3.56067	0.000369912	0.000694733
CNAG_01703	4182.82	0.379097	0.0860413	4.40599	1.05301e-05	2.35449e-05
CNAG_01704	48646	0.96508	0.0837135	11.5284	9.49264e-31	1.08936e-29
CNAG_01706	1820.45	0.522179	0.113782	4.58928	4.44779e-06	1.03195e-05
CNAG_01707	8379.49	0.512088	0.0707858	7.23433	4.67818e-13	1.93837e-12
CNAG_01708	6670.74	0.0427268	0.0707219	0.604152	0.545743	0.60356
CNAG_01709	22430.5	0.040806	0.0670399	0.608683	0.542735	0.600632
CNAG_01710	2620.74	-0.470666	0.1879	-2.50488	0.0122492	0.0188276
CNAG_01711	5642.67	-0.857853	0.0915418	-9.37116	7.17373e-21	4.89225e-20
CNAG_01712	6851.18	0.373018	0.100461	3.71305	0.000204777	0.000397514
CNAG_01713	43064.2	-0.0370773	0.0729461	-0.508284	0.611254	0.663866
CNAG_01714	1428.17	1.01695	0.155704	6.53135	6.51795e-11	2.30371e-10
CNAG_01715	20016.8	1.22941	0.115332	10.6598	1.56972e-26	1.49943e-25
CNAG_01716	5972.45	0.494439	0.0894989	5.52452	3.30389e-08	9.39132e-08
CNAG_01717	2985.41	0.0493848	0.0948953	0.520414	0.602775	0.65591
CNAG_01718	6754.91	-0.13544	0.0657945	-2.05853	0.0395392	0.0563009
CNAG_01719	4869.87	-0.0403345	0.111734	-0.360985	0.718111	0.762077
CNAG_01720	1526.15	-0.325191	0.14095	-2.30713	0.0210476	0.0312038
CNAG_01721	5204.76	0.179605	0.125264	1.43382	0.151624	0.193789
CNAG_01722	24959.5	0.380516	0.111679	3.40724	0.000656238	0.00119953
CNAG_01723	6474.58	1.56512	0.064147	24.399	1.75432e-131	1.73761e-129
CNAG_01725	530.264	1.82315	0.178894	10.1912	2.17026e-24	1.80385e-23
CNAG_01726	17651.7	0.686722	0.106307	6.45977	1.04862e-10	3.6489e-10
CNAG_01727	29951.8	0.0559011	0.0750814	0.74454	0.45655	0.51638
CNAG_01728	5584.93	-0.52994	0.0683681	-7.75128	9.09706e-15	4.27855e-14
CNAG_01729	11924.8	0.985925	0.123511	7.98247	1.43439e-15	7.0658e-15
CNAG_01730	3566.46	-0.0172712	0.15979	-0.108087	0.913927	0.933219
CNAG_01731	5447.65	0.365596	0.101852	3.58949	0.000331327	0.000625941
CNAG_01732	5316.55	-0.469014	0.107661	-4.35638	1.32231e-05	2.92205e-05
CNAG_01733	11714.4	-0.0656167	0.0893581	-0.734312	0.462759	0.52248
CNAG_01734	9224.85	-0.21979	0.0707	-3.10877	0.00187866	0.00323076
CNAG_01735	92050.5	2.02621	0.219556	9.22869	2.73972e-20	1.81052e-19
CNAG_01736	9891.37	0.00371984	0.184197	0.0201949	0.983888	0.988522
CNAG_01737	26116.9	0.238454	0.0756148	3.15353	0.00161306	0.00279597
CNAG_01738	3515.29	0.336979	0.0813937	4.14011	3.47139e-05	7.30265e-05
CNAG_01739	2088.77	-0.174597	0.10417	-1.67608	0.0937221	0.124643
CNAG_01740	8600.96	0.253547	0.0835406	3.03502	0.0024052	0.00406898
CNAG_01741	4371.09	-0.978894	0.0992145	-9.86644	5.81935e-23	4.45419e-22
CNAG_01742	16656.5	-2.39702	0.0759134	-31.5757	7.96005e-219	2.6491e-216
CNAG_01743	11143.4	-0.222622	0.121492	-1.8324	0.0668915	0.0912805
CNAG_01744	38478.9	0.792637	0.0774782	10.2305	1.44829e-24	1.22209e-23
CNAG_01745	40393.4	0.625802	0.100024	6.25653	3.93646e-10	1.31532e-09
CNAG_01746	5002.71	0.340184	0.0825729	4.11981	3.79193e-05	7.94882e-05
CNAG_01749	8584.34	0.721607	0.125305	5.75878	8.4722e-09	2.53408e-08
CNAG_01750	29409.7	-0.200655	0.130544	-1.53707	0.124276	0.161382
CNAG_01751	14772.2	-1.01072	0.17428	-5.79942	6.65452e-09	2.0111e-08
CNAG_01752	7461.89	-1.32955	0.0862047	-15.4232	1.14235e-53	2.64009e-52
CNAG_01753	14963.5	-0.482701	0.108201	-4.46116	8.15165e-06	1.84448e-05
CNAG_01754	7531.73	0.140561	0.0708206	1.98474	0.0471731	0.0660185
CNAG_01755	17955.4	1.11936	0.106482	10.5123	7.58564e-26	6.93023e-25
CNAG_01756	2915.47	1.11542	0.102231	10.9107	1.02408e-27	1.03654e-26
CNAG_01758	1843.23	0.0631821	0.116013	0.544614	0.586019	0.64061
CNAG_01759	956.376	-0.292436	0.130113	-2.24756	0.0246044	0.0361675
CNAG_01760	10936.9	0.188914	0.0710473	2.65899	0.00783759	0.01239
CNAG_01761	27170.7	1.26454	0.0872361	14.4956	1.29181e-47	2.59609e-46
CNAG_01763	1028.74	0.211799	0.157614	1.34379	0.179018	0.225125
CNAG_01764	3486.18	0.122905	0.107689	1.1413	0.253745	0.30748
CNAG_01765	10113.3	0.63914	0.0783106	8.1616	3.30613e-16	1.70322e-15
CNAG_01768	18651	1.42522	0.0707864	20.134	3.71656e-90	1.76696e-88
CNAG_01769	5446.28	-1.91268	0.0790385	-24.1994	2.2587e-129	2.18516e-127
CNAG_01770	12294.8	0.409129	0.0672468	6.08399	1.17225e-09	3.76276e-09
CNAG_01771	7963.55	0.0743932	0.0815295	0.91247	0.361522	0.420092
CNAG_01772	8462.91	-0.6748	0.100539	-6.71184	1.92192e-11	7.07224e-11
CNAG_01773	3307.83	-0.0792949	0.102431	-0.774132	0.438853	0.498942
CNAG_01776	1525.2	-0.173568	0.133885	-1.2964	0.194838	0.242928
CNAG_01777	6444.46	-1.83215	0.107467	-17.0486	3.58306e-65	1.10004e-63
CNAG_01778	10730.4	-1.15495	0.0654435	-17.648	1.05374e-69	3.52094e-68
CNAG_01779	9633.31	-0.570202	0.079022	-7.21574	5.36429e-13	2.21054e-12
CNAG_01780	15074.3	0.924709	0.103963	8.89457	5.86437e-19	3.61419e-18
CNAG_01781	16427.5	0.121966	0.084416	1.44482	0.148508	0.190295
CNAG_01787	8006.08	-0.453836	0.0913087	-4.97034	6.68344e-07	1.68811e-06
CNAG_01788	9957.92	0.969774	0.10878	8.91502	4.87733e-19	3.02155e-18
CNAG_01789	4740.24	0.59679	0.104615	5.70465	1.16584e-08	3.44699e-08
CNAG_01790	2836.9	-0.122195	0.0935493	-1.30621	0.19148	0.239422
CNAG_01791	22233.9	1.04623	0.120026	8.71669	2.86452e-18	1.67719e-17
CNAG_01792	14354.4	0.959847	0.0791642	12.1248	7.80837e-34	1.02957e-32
CNAG_01793	6308.38	0.509646	0.0702599	7.25372	4.05476e-13	1.68931e-12
CNAG_01794	5760.69	-3.97212	0.156241	-25.423	1.40504e-142	1.55865e-140
CNAG_01795	4374.71	-0.841647	0.103614	-8.12291	4.55147e-16	2.32321e-15
CNAG_01796	36141	-1.08655	0.075217	-14.4455	2.6769e-47	5.32819e-46
CNAG_01797	4681.1	0.568803	0.116974	4.86264	1.15828e-06	2.85283e-06
CNAG_01798	3018.15	-0.449439	0.0842786	-5.33278	9.67204e-08	2.62635e-07
CNAG_01799	13025.5	-0.807991	0.0910196	-8.87711	6.86193e-19	4.20097e-18
CNAG_01800	2512.28	-0.778472	0.192359	-4.04697	5.18839e-05	0.000107355
CNAG_01801	364.08	-0.476219	0.189523	-2.51273	0.0119802	0.0184311
CNAG_01802	7387.39	0.859339	0.110611	7.76901	7.9103e-15	3.73094e-14
CNAG_01803	16329.1	0.987087	0.151324	6.52299	6.89202e-11	2.43386e-10
CNAG_01806	1177.89	-0.0915821	0.160532	-0.570492	0.568344	0.62457
CNAG_01807	2742.78	0.411094	0.114416	3.59298	0.00032692	0.000618035
CNAG_01808	17007.1	0.0911864	0.0568576	1.60377	0.108765	0.142778
CNAG_01809	4740.14	0.132524	0.0892781	1.48439	0.137704	0.177243
CNAG_01810	3388.7	1.95648	0.142395	13.7398	5.86438e-43	1.02936e-41
CNAG_01811	3982.56	0.468907	0.0837458	5.59917	2.15374e-08	6.21977e-08
CNAG_01812	14426.2	0.72436	0.0848313	8.53883	1.35584e-17	7.63236e-17
CNAG_01813	46284.7	-0.32003	0.0602017	-5.31597	1.06091e-07	2.8705e-07
CNAG_01814	4818.32	0.33268	0.0759587	4.37975	1.18816e-05	2.64036e-05
CNAG_01815	13446.8	-2.79688	0.0840418	-33.2796	7.62067e-243	3.01924e-240
CNAG_01816	944.188	-0.57308	0.167214	-3.42723	0.000609778	0.00111748
CNAG_01817	3728.1	0.222502	0.075829	2.93427	0.00334338	0.00552801
CNAG_01818	5390.83	0.785675	0.0911128	8.6231	6.51642e-18	3.74166e-17
CNAG_01819	1097.72	0.24703	0.160451	1.5396	0.123658	0.160655
CNAG_01820	31619.7	0.285427	0.0838806	3.40277	0.000667064	0.00121716
CNAG_01821	8401.59	-0.767245	0.116658	-6.57685	4.80519e-11	1.71732e-10
CNAG_01822	6792.11	-0.179655	0.110185	-1.63049	0.102998	0.135614
CNAG_01823	6889.55	-0.313423	0.0726729	-4.31279	1.61204e-05	3.52674e-05
CNAG_01824	13306.9	-0.0338539	0.0961343	-0.352152	0.724724	0.76792
CNAG_01825	2526.54	0.143768	0.0720016	1.99673	0.0458545	0.064303
CNAG_01826	3775.86	0.538497	0.0973023	5.53427	3.12534e-08	8.90508e-08
CNAG_01827	1132.89	0.604601	0.114077	5.29994	1.15844e-07	3.12017e-07
CNAG_01828	6376.72	0.542422	0.0980205	5.53376	3.13434e-08	8.92766e-08
CNAG_01832	2521.56	0.122426	0.0926887	1.32083	0.186558	0.233865
CNAG_01833	8865.71	0.731344	0.107946	6.77508	1.24337e-11	4.63686e-11
CNAG_01834	5021.81	-0.724299	0.0968382	-7.47948	7.46196e-14	3.30936e-13
CNAG_01835	14264.3	0.759597	0.107724	7.05131	1.77236e-12	7.07583e-12
CNAG_01836	1641.94	0.500925	0.0800439	6.25813	3.8963e-10	1.30242e-09
CNAG_01837	8877.86	-0.54427	0.0611599	-8.89913	5.62881e-19	3.47159e-18
CNAG_01839	6556.02	-0.483805	0.0693853	-6.97273	3.10844e-12	1.21877e-11
CNAG_01840	64828.1	-0.381909	0.101005	-3.7811	0.000156137	0.00030747
CNAG_01841	3105.04	-1.03945	0.134742	-7.71438	1.21569e-14	5.68488e-14
CNAG_01842	8624.06	0.770181	0.108135	7.1224	1.0606e-12	4.30239e-12
CNAG_01843	3933.33	0.63177	0.0865335	7.30087	2.8591e-13	1.20811e-12
CNAG_01844	4892.27	2.27734	0.0977622	23.2947	5.0146e-120	4.05063e-118
CNAG_01845	21801.2	-0.586884	0.101068	-5.80681	6.36724e-09	1.92638e-08
CNAG_01846	4007.45	-1.02462	0.179515	-5.7077	1.1451e-08	3.39168e-08
CNAG_01847	3287.61	0.292408	0.176051	1.66092	0.0967288	0.128212
CNAG_01848	11430.6	-0.264672	0.085193	-3.10673	0.0018917	0.00324916
CNAG_01849	792.552	1.14058	0.144181	7.91072	2.55896e-15	1.23567e-14
CNAG_01850	15238.7	0.164595	0.0673522	2.4438	0.0145336	0.0220615
CNAG_01851	64.3204	0.165051	0.362019	0.455919	0.648448	0.699208
CNAG_01852	6399.09	-0.24643	0.0704494	-3.49798	0.000468803	0.000869275
CNAG_01853	3496.85	0.0101675	0.135916	0.0748072	0.940368	0.954362
CNAG_01854	263527	1.65082	0.077892	21.1937	1.09187e-99	6.01615e-98
CNAG_01855	5387.16	-0.209776	0.0627201	-3.34464	0.000823897	0.00148598
CNAG_01856	6582.38	0.338439	0.110736	3.05626	0.00224114	0.00380615
CNAG_01857	0.428568	-0.604559	4.60558	-0.131267	0.895564	0.918188
CNAG_01858	2425.6	0.337343	0.0916901	3.67916	0.000234003	0.000450672
CNAG_01859	6121.76	0.111222	0.0863801	1.28758	0.197891	0.246475
CNAG_01860	1921.64	0.110447	0.108429	1.01861	0.308388	0.366332
CNAG_01861	4137.6	0.297547	0.0740893	4.01606	5.91802e-05	0.000121485
CNAG_01862	870.274	-0.0720126	0.129189	-0.557422	0.577239	0.632591
CNAG_01863	9620.95	0.0140297	0.0681283	0.205931	0.836845	0.867715
CNAG_01864	2389.9	0.0566612	0.0780067	0.726363	0.467616	0.527391
CNAG_01865	5615.18	-1.17997	0.0785712	-15.0178	5.61252e-51	1.21385e-49
CNAG_01866	5419.79	0.0804609	0.0881585	0.912685	0.361408	0.420019
CNAG_01867	7175.09	0.165218	0.0903232	1.82919	0.067371	0.0919047
CNAG_01868	3709.42	-0.0160986	0.0696272	-0.231211	0.817151	0.850504
CNAG_01869	4019.86	0.536217	0.0979316	5.47543	4.3646e-08	1.22515e-07
CNAG_01870	7761.26	-0.743164	0.0783125	-9.48973	2.31634e-21	1.62359e-20
CNAG_01871	4579.12	-0.598492	0.0959857	-6.23522	4.51136e-10	1.50198e-09
CNAG_01872	875.626	-0.344933	0.131026	-2.63256	0.00847445	0.0133159
CNAG_01873	47.1316	-0.562048	0.414756	-1.35513	0.175376	0.221181
CNAG_01874	4270.41	-0.499532	0.0886088	-5.6375	1.7254e-08	5.03342e-08
CNAG_01875	3898.9	-0.228841	0.121981	-1.87603	0.0606506	0.0833972
CNAG_01876	7260.88	0.271569	0.0660034	4.11447	3.8807e-05	8.1267e-05
CNAG_01877	28480.6	0.798204	0.112134	7.11832	1.09252e-12	4.42109e-12
CNAG_01878	1843.76	0.149516	0.105348	1.41926	0.155823	0.198567
CNAG_01879	21480	-1.19851	0.053677	-22.3281	1.97077e-110	1.32233e-108
CNAG_01880	3654.82	-0.0836104	0.0897788	-0.931294	0.351702	0.410977
CNAG_01881	3943.97	1.24533	0.1079	11.5415	8.14653e-31	9.37471e-30
CNAG_01882	1432.34	0.13203	0.124637	1.05931	0.289458	0.346217
CNAG_01883	1912.2	-0.060592	0.149405	-0.405555	0.685069	0.733185
CNAG_01884	82849.6	0.356327	0.0932593	3.82082	0.000133007	0.000264424
CNAG_01885	4980.81	1.01291	0.124176	8.15706	3.4327e-16	1.76624e-15
CNAG_01886	3493.19	-0.249061	0.0743731	-3.34881	0.000811607	0.00146508
CNAG_01889	4002.07	1.05361	0.113387	9.29218	1.51153e-20	1.01337e-19
CNAG_01890	60822	0.293421	0.0927688	3.16293	0.00156192	0.00271071
CNAG_01891	3072.71	0.347969	0.0912865	3.81183	0.000137941	0.000273581
CNAG_01892	9089.69	0.334986	0.121525	2.75651	0.00584216	0.00936546
CNAG_01893	9040.2	-0.516212	0.10575	-4.88141	1.05327e-06	2.60578e-06
CNAG_01894	9602.99	0.397245	0.0805624	4.9309	8.18519e-07	2.04507e-06
CNAG_01895	297.445	-0.467146	0.202111	-2.31133	0.0208145	0.0308914
CNAG_01896	51831.8	0.955979	0.0784321	12.1886	3.57456e-34	4.76607e-33
CNAG_01897	15760	-0.0521996	0.0899126	-0.580559	0.561538	0.618152
CNAG_01898	8956.14	1.0153	0.146664	6.92258	4.43491e-12	1.72665e-11
CNAG_01899	1611.03	0.137113	0.129087	1.06217	0.288159	0.344912
CNAG_01900	2305.81	-0.718748	0.111293	-6.45818	1.05971e-10	3.68387e-10
CNAG_01901	73.1485	-0.974631	0.355413	-2.74225	0.00610206	0.00975954
CNAG_01902	8746.88	-0.631586	0.0922438	-6.84692	7.54591e-12	2.87595e-11
CNAG_01903	2566.93	-0.973061	0.147711	-6.58758	4.4706e-11	1.60187e-10
CNAG_01904	3112.92	0.2467	0.10427	2.36598	0.0179825	0.0269236
CNAG_01905	19645.8	0.0832296	0.0802622	1.03697	0.299749	0.356987
CNAG_01906	3852.04	0.538102	0.0927944	5.79887	6.67652e-09	2.01702e-08
CNAG_01907	3359.4	-0.0473556	0.117944	-0.40151	0.688045	0.735612
CNAG_01908	637.112	-0.372374	0.233714	-1.59329	0.111096	0.145516
CNAG_01909	3255.29	-0.322054	0.161424	-1.99508	0.0460338	0.0645327
CNAG_01910	1890.35	-0.307938	0.101261	-3.04102	0.00235774	0.00399114
CNAG_01911	2844.14	-0.329301	0.0972617	-3.38572	0.00070991	0.00129046
CNAG_01912	10834.9	-0.589679	0.133814	-4.4067	1.04957e-05	2.34742e-05
CNAG_01913	3420.28	-0.548233	0.125886	-4.35501	1.3306e-05	2.93884e-05
CNAG_01914	3802.73	-0.0156771	0.0959314	-0.16342	0.870188	0.8963
CNAG_01915	37963.9	-0.0939891	0.100604	-0.93425	0.350175	0.409538
CNAG_01916	19494.7	0.950816	0.129627	7.335	2.21722e-13	9.4215e-13
CNAG_01917	1192.19	0.0323174	0.119471	0.270503	0.786773	0.823411
CNAG_01918	3373.72	-0.439227	0.0938087	-4.68216	2.83868e-06	6.71915e-06
CNAG_01919	18243.5	-0.958045	0.0796336	-12.0307	2.45196e-33	3.15306e-32
CNAG_01920	81063.5	0.0349038	0.0809777	0.43103	0.666447	0.71574
CNAG_01921	895.187	1.17102	0.122408	9.56657	1.10511e-21	7.90535e-21
CNAG_01922	7056.93	0.176265	0.0861552	2.0459	0.0407661	0.0578993
CNAG_01923	4945.91	-0.229618	0.0721587	-3.18212	0.001462	0.0025458
CNAG_01924	1831.47	-1.14363	0.153532	-7.44878	9.42096e-14	4.13409e-13
CNAG_01925	3060.36	-0.36628	0.0921725	-3.97385	7.07186e-05	0.000143928
CNAG_01926	1120.55	-0.438259	0.173221	-2.53006	0.0114043	0.0176037
CNAG_01927	2032.88	0.491508	0.119662	4.10746	4.00039e-05	8.36262e-05
CNAG_01928	3391.04	1.10179	0.0923646	11.9287	8.38818e-33	1.05582e-31
CNAG_01929	4739.51	0.274621	0.11199	2.4522	0.0141985	0.0215844
CNAG_01930	9087.81	1.09226	0.0977274	11.1766	5.30807e-29	5.62587e-28
CNAG_01931	186.788	0.331736	0.315227	1.05237	0.292628	0.349557
CNAG_01933	54.1177	0.0141124	0.622901	0.022656	0.981925	0.987145
CNAG_01934	1221.1	-1.14564	0.116157	-9.86288	6.02939e-23	4.60647e-22
CNAG_01936	896.688	-1.17121	0.138485	-8.4573	2.73647e-17	1.50578e-16
CNAG_01937	1436.48	-0.563316	0.100846	-5.58591	2.32474e-08	6.69035e-08
CNAG_01938	13075.5	-0.45993	0.0631469	-7.28349	3.25284e-13	1.36478e-12
CNAG_01939	15777	2.28204	0.0895074	25.4956	2.20576e-143	2.51396e-141
CNAG_01940	6331.36	0.959475	0.105661	9.08068	1.07895e-19	6.91593e-19
CNAG_01941	8513.57	0.427782	0.0793003	5.39445	6.87329e-08	1.89232e-07
CNAG_01942	4829.95	0.636608	0.177836	3.57975	0.00034393	0.000648865
CNAG_01943	7436.4	1.05907	0.0900146	11.7655	5.87832e-32	7.12939e-31
CNAG_01944	36.783	-1.00297	0.494271	-2.02919	0.0424389	0.0600395
CNAG_01945	349.391	-1.49858	0.217622	-6.88614	5.7328e-12	2.21205e-11
CNAG_01946	2868.35	-1.07487	0.115606	-9.29772	1.43486e-20	9.64301e-20
CNAG_01947	642.646	0.619719	0.16859	3.67589	0.000237018	0.000456268
CNAG_01948	4928.13	0.361522	0.0643652	5.61673	1.94605e-08	5.64938e-08
CNAG_01949	2746.23	-0.833751	0.0869845	-9.58505	9.24144e-22	6.65128e-21
CNAG_01950	9357.71	0.324465	0.0753852	4.3041	1.67667e-05	3.66428e-05
CNAG_01951	36698.3	0.440627	0.0781813	5.63596	1.74083e-08	5.07664e-08
CNAG_01952	2061.61	0.475221	0.0864766	5.49537	3.89891e-08	1.10037e-07
CNAG_01953	2631.68	0.256908	0.0994122	2.58427	0.00975861	0.0151817
CNAG_01954	421.133	-0.333154	0.188321	-1.76908	0.0768804	0.103771
CNAG_01955	17.8361	2.66306	0.958118	2.77947	0.0054447	0.00875867
CNAG_01956	1712.12	0.104105	0.0910408	1.1435	0.252829	0.306639
CNAG_01957	5317.45	0.0616918	0.0619386	0.996016	0.319243	0.377501
CNAG_01958	9038.79	-0.0412278	0.0801734	-0.514233	0.607089	0.659763
CNAG_01959	6798.42	0.393687	0.129906	3.03055	0.00244108	0.00412465
CNAG_01960	2417.26	0.0146494	0.136639	0.107213	0.91462	0.933768
CNAG_01961	16805.6	-0.882276	0.0630199	-14	1.55946e-44	2.88326e-43
CNAG_01962	586.882	-0.613702	0.170266	-3.60437	0.000312909	0.000593166
CNAG_01963	1433.07	-0.140796	0.116981	-1.20358	0.228752	0.28038
CNAG_01964	4338.22	0.907554	0.143857	6.30874	2.81316e-10	9.50284e-10
CNAG_01965	368.862	0.0129359	0.206668	0.0625926	0.950091	0.960982
CNAG_01968	981.253	-0.887134	0.160378	-5.5315	3.17497e-08	9.0403e-08
CNAG_01969	1891.01	0.456108	0.0703349	6.48481	8.88444e-11	3.11105e-10
CNAG_01970	8314.51	-0.727678	0.10723	-6.78612	1.15186e-11	4.31492e-11
CNAG_01971	100.854	-1.06283	0.340097	-3.12507	0.00177764	0.00306718
CNAG_01972	16369.6	-0.571873	0.0925858	-6.17667	6.54659e-10	2.14947e-09
CNAG_01973	10952.1	-0.103631	0.0632037	-1.63963	0.101083	0.133251
CNAG_01974	1506.72	0.77589	0.113693	6.82446	8.82575e-12	3.34229e-11
CNAG_01975	8966.22	0.475453	0.104287	4.55907	5.13816e-06	1.18485e-05
CNAG_01976	38147.2	0.316132	0.0567668	5.56896	2.56262e-08	7.34447e-08
CNAG_01977	706.447	-0.872651	0.14366	-6.0744	1.24452e-09	3.99169e-09
CNAG_01978	955.33	-0.414392	0.104841	-3.95256	7.73208e-05	0.000156828
CNAG_01979	15988.9	-3.71274	0.100171	-37.0641	1.0627e-300	6.31546e-298
CNAG_01980	6014.36	-8.16996	0.302613	-26.9981	1.55778e-160	2.02511e-158
CNAG_01981	13228.9	0.532106	0.0925062	5.75211	8.81344e-09	2.63296e-08
CNAG_01982	10475	-0.421804	0.127966	-3.29622	0.00097995	0.00174661
CNAG_01983	48359.7	-1.04973	0.0828152	-12.6756	8.07427e-37	1.16024e-35
CNAG_01984	61764	0.218739	0.0845006	2.58861	0.00963642	0.0150084
CNAG_01985	34504.8	-0.854973	0.0653901	-13.075	4.57822e-39	7.18694e-38
CNAG_01986	5657.03	-0.394021	0.13089	-3.01031	0.00260981	0.00438792
CNAG_01987	6249.47	-0.264449	0.112664	-2.34724	0.0189133	0.0282257
CNAG_01988	9678.2	-0.050353	0.0942323	-0.53435	0.593099	0.64665
CNAG_01989	1594.21	0.0313559	0.134138	0.233759	0.815172	0.849053
CNAG_01990	49620.1	0.538465	0.0787277	6.83959	7.94207e-12	3.02002e-11
CNAG_01991	10550.1	-0.281731	0.0771164	-3.65332	0.000258869	0.00049615
CNAG_01992	3183.42	-1.26682	0.111721	-11.3392	8.39252e-30	9.15148e-29
CNAG_01993	20391.2	-2.90306	0.104105	-27.886	3.94567e-171	6.69958e-169
CNAG_01994	1773.84	-1.25443	0.125421	-10.0018	1.49628e-23	1.19015e-22
CNAG_01995	39.4878	1.05857	0.510542	2.07342	0.038133	0.0544664
CNAG_01996	3036.38	0.47759	0.10624	4.49539	6.94422e-06	1.5816e-05
CNAG_01997	5600.66	0.19136	0.0921763	2.07602	0.0378925	0.054181
CNAG_01999	2307.39	-0.260105	0.128935	-2.01733	0.0436606	0.0615585
CNAG_02000	5542.03	-0.725952	0.108702	-6.67837	2.41618e-11	8.83242e-11
CNAG_02001	9101.34	-0.467298	0.0791528	-5.90374	3.5535e-09	1.09867e-08
CNAG_02002	3871.51	0.941314	0.0826783	11.3853	4.95197e-30	5.45701e-29
CNAG_02004	13159.6	-0.696188	0.0818132	-8.50949	1.74699e-17	9.73538e-17
CNAG_02005	1939.88	2.73394	0.234135	11.6768	1.67536e-31	1.98561e-30
CNAG_02006	3941.91	-0.69088	0.121974	-5.66416	1.4775e-08	4.3315e-08
CNAG_02007	5421.3	0.50531	0.0647398	7.80525	5.93834e-15	2.81361e-14
CNAG_02008	50670.5	0.302813	0.0974185	3.10837	0.00188123	0.00323318
CNAG_02009	4421.99	-1.07391	0.122573	-8.76138	1.92871e-18	1.14131e-17
CNAG_02010	1573.39	0.357455	0.0947231	3.77368	0.000160856	0.000316313
CNAG_02011	3027.37	0.742301	0.11658	6.36733	1.92347e-10	6.54797e-10
CNAG_02012	2199.91	0.457804	0.0908748	5.03774	4.7105e-07	1.20293e-06
CNAG_02013	1943.2	-1.06773	0.170383	-6.26666	3.68875e-10	1.23503e-09
CNAG_02016	154.062	-1.34289	0.288329	-4.6575	3.20073e-06	7.54392e-06
CNAG_02017	136.519	-0.525911	0.238548	-2.20464	0.0274796	0.0401528
CNAG_02018	1807.28	-0.564556	0.0853725	-6.61286	3.76969e-11	1.35951e-10
CNAG_02020	4530.55	0.278922	0.0552229	5.05083	4.39898e-07	1.12614e-06
CNAG_02021	1604.25	-0.227318	0.113718	-1.99896	0.0456122	0.0639848
CNAG_02022	3040.24	-0.0366366	0.0708366	-0.517199	0.605017	0.658005
CNAG_02023	1919.27	0.340512	0.164558	2.06926	0.0385221	0.0549654
CNAG_02024	7057.59	0.481514	0.128485	3.74762	0.000178521	0.000349481
CNAG_02025	5252.57	0.870077	0.102944	8.45195	2.86475e-17	1.57221e-16
CNAG_02026	1240.44	0.527523	0.124784	4.2275	2.363e-05	5.0762e-05
CNAG_02027	5807.45	-0.0377465	0.101134	-0.373231	0.708976	0.754013
CNAG_02028	2770.82	-0.78619	0.149388	-5.26275	1.41917e-07	3.79539e-07
CNAG_02029	1694.29	-1.1402	0.165918	-6.87209	6.32687e-12	2.43251e-11
CNAG_02030	151911	2.08245	0.0795429	26.1803	4.46016e-151	5.37805e-149
CNAG_02031	93.1252	-0.591858	0.914811	-0.646973	0.51765	0.576243
CNAG_02032	6299.4	0.130015	0.0785454	1.65528	0.0978672	0.129638
CNAG_02033	3998.88	0.428379	0.0699663	6.12265	9.20323e-10	2.97594e-09
CNAG_02034	2670.37	0.83466	0.120656	6.91767	4.59144e-12	1.78425e-11
CNAG_02035	33671.9	0.116355	0.0532674	2.18436	0.0289356	0.0420955
CNAG_02036	5206.71	1.10302	0.132754	8.30877	9.66965e-17	5.16046e-16
CNAG_02037	6759.57	0.511239	0.0625585	8.17218	3.02864e-16	1.56317e-15
CNAG_02038	4495.78	-0.129145	0.0917519	-1.40754	0.159267	0.202615
CNAG_02039	393.709	0.218863	0.196043	1.1164	0.264251	0.318679
CNAG_02040	9261.47	-0.718893	0.163341	-4.40118	1.07662e-05	2.40377e-05
CNAG_02041	9984.87	-2.38201	0.229368	-10.3851	2.89915e-25	2.5284e-24
CNAG_02043	1071.66	-1.46543	0.127266	-11.5147	1.11204e-30	1.26742e-29
CNAG_02044	8855.27	-0.42768	0.13129	-3.25751	0.00112395	0.00198921
CNAG_02045	1359.31	-1.23294	0.226616	-5.44064	5.30902e-08	1.47977e-07
CNAG_02046	10764.5	-0.0416831	0.0907127	-0.459507	0.64587	0.696699
CNAG_02047	2126.48	-1.24952	0.12615	-9.90499	3.96006e-23	3.07061e-22
CNAG_02048	5226.79	-1.00805	0.0883043	-11.4156	3.49492e-30	3.8926e-29
CNAG_02049	195.389	-1.7119	0.204492	-8.37148	5.69014e-17	3.06818e-16
CNAG_02050	5276.84	0.771373	0.0737244	10.4629	1.27858e-25	1.14017e-24
CNAG_02051	4584.12	0.0687819	0.129254	0.532145	0.594625	0.648059
CNAG_02052	597.114	-0.575696	0.180168	-3.19534	0.00139669	0.00244281
CNAG_02053	1990.84	-0.286571	0.104696	-2.73718	0.00619684	0.00990541
CNAG_02054	3874.75	0.55872	0.108905	5.13033	2.89236e-07	7.54371e-07
CNAG_02055	8254.34	0.340112	0.071827	4.73516	2.18887e-06	5.25277e-06
CNAG_02056	566.308	-1.25868	0.278135	-4.52541	6.02788e-06	1.38084e-05
CNAG_02057	2647.84	-0.321944	0.138832	-2.31895	0.0203976	0.0303267
CNAG_02058	1647.13	-0.481875	0.093754	-5.13978	2.7506e-07	7.19429e-07
CNAG_02059	8034.88	-0.114997	0.100645	-1.1426	0.253204	0.306959
CNAG_02060	4204.97	-1.43193	0.158177	-9.05268	1.39498e-19	8.88687e-19
CNAG_02061	4238.34	-0.190038	0.0728117	-2.60999	0.00905449	0.0141711
CNAG_02062	5120.83	1.00157	0.115495	8.672	4.2459e-18	2.46314e-17
CNAG_02063	18356.6	-0.466253	0.0768706	-6.06543	1.31605e-09	4.2049e-09
CNAG_02064	12263.8	0.680017	0.115223	5.90174	3.59685e-09	1.11166e-08
CNAG_02065	2468.57	0.392585	0.0903237	4.34643	1.38373e-05	3.05052e-05
CNAG_02066	1797.97	-1.36793	0.132633	-10.3136	6.11801e-25	5.23645e-24
CNAG_02067	6739.53	-0.144756	0.0971682	-1.48974	0.136291	0.175588
CNAG_02068	3761.45	0.135514	0.0694772	1.95048	0.051119	0.071134
CNAG_02069	2497.71	-1.14017	0.207969	-5.48238	4.19635e-08	1.18111e-07
CNAG_02070	51984.2	0.379148	0.132772	2.85563	0.00429518	0.00701253
CNAG_02071	44173.4	0.69354	0.109976	6.30629	2.85808e-10	9.64282e-10
CNAG_02072	6552.61	-0.140424	0.100781	-1.39336	0.163512	0.207476
CNAG_02073	9167.24	0.139521	0.0914793	1.52516	0.127219	0.164844
CNAG_02074	3721.79	0.388254	0.0725825	5.34915	8.83703e-08	2.40984e-07
CNAG_02075	1932.75	0.735968	0.120004	6.13286	8.63105e-10	2.80181e-09
CNAG_02076	2461.6	0.268091	0.123807	2.1654	0.0303574	0.0439717
CNAG_02077	1810.02	-0.0842598	0.103595	-0.813362	0.416011	0.476422
CNAG_02078	6825.68	-0.919137	0.0740938	-12.4051	2.45345e-35	3.4135e-34
CNAG_02079	35246.8	-0.18291	0.102746	-1.78023	0.0750391	0.101516
CNAG_02080	6885.52	0.0405644	0.075824	0.53498	0.592663	0.64626
CNAG_02081	8125	0.326862	0.0546507	5.98093	2.21873e-09	6.98442e-09
CNAG_02082	1634.26	-0.13423	0.120978	-1.10954	0.267197	0.321906
CNAG_02083	8634.24	0.500612	0.134139	3.73203	0.000189946	0.00037054
CNAG_02084	7456.93	0.613718	0.0913148	6.72091	1.80598e-11	6.66034e-11
CNAG_02085	3446.82	-0.191507	0.0834848	-2.29392	0.0217953	0.0322205
CNAG_02086	7129.88	0.657156	0.085221	7.71119	1.24649e-14	5.81647e-14
CNAG_02087	2566.02	-0.650098	0.121789	-5.3379	9.40317e-08	2.55751e-07
CNAG_02088	4233.88	-0.767157	0.100812	-7.60977	2.74582e-14	1.25179e-13
CNAG_02089	6126.67	-1.0093	0.13244	-7.62081	2.52094e-14	1.15053e-13
CNAG_02090	3933.28	1.59226	0.114042	13.962	2.65823e-44	4.8395e-43
CNAG_02091	41603.8	-0.25701	0.0636931	-4.03513	5.45729e-05	0.000112434
CNAG_02092	4420.82	-0.781206	0.0969466	-8.0581	7.7489e-16	3.91207e-15
CNAG_02093	2631.57	0.365782	0.0988497	3.70039	0.000215269	0.000416618
CNAG_02094	3629.28	-0.506945	0.0943079	-5.37542	7.64037e-08	2.09036e-07
CNAG_02095	11471.5	-0.623698	0.0865041	-7.21004	5.59359e-13	2.30276e-12
CNAG_02096	750.388	-1.7571	0.215868	-8.13971	3.9624e-16	2.02626e-15
CNAG_02097	1301.62	-0.43573	0.114061	-3.82016	0.000133364	0.00026507
CNAG_02099	34527.5	-0.749482	0.0940127	-7.97213	1.5596e-15	7.65539e-15
CNAG_02100	22936.8	-0.382237	0.126833	-3.01371	0.00258078	0.00434481
CNAG_02101	6713.67	1.02012	0.122202	8.34777	6.95617e-17	3.73389e-16
CNAG_02102	965.613	0.883484	0.163495	5.40374	6.52671e-08	1.80346e-07
CNAG_02103	8571.65	-0.70161	0.0618234	-11.3486	7.53452e-30	8.23748e-29
CNAG_02104	7687.23	-0.0314919	0.0860187	-0.366105	0.714287	0.758793
CNAG_02105	1000.56	-0.405444	0.129978	-3.11932	0.00181268	0.00312505
CNAG_02106	3026.1	0.670139	0.0900933	7.43828	1.02007e-13	4.46289e-13
CNAG_02107	5562.79	-1.05529	0.0880164	-11.9897	4.02344e-33	5.11851e-32
CNAG_02108	3329.85	0.0872241	0.0933024	0.934854	0.349864	0.409232
CNAG_02109	9549.05	0.423044	0.0792804	5.33604	9.49969e-08	2.58123e-07
CNAG_02110	5252.29	0.458531	0.0781124	5.87014	4.35427e-09	1.33486e-08
CNAG_02111	3769.88	-0.0743923	0.0671712	-1.1075	0.268077	0.322918
CNAG_02112	2792.36	-0.421382	0.112414	-3.74847	0.000177917	0.000348381
CNAG_02113	3352.08	-0.0777835	0.0801669	-0.97027	0.331912	0.390374
CNAG_02114	16687.8	-0.318937	0.0703372	-4.53439	5.77689e-06	1.3248e-05
CNAG_02115	3926	-0.0383271	0.103366	-0.370789	0.710794	0.755469
CNAG_02116	2934.41	-1.02829	0.0855005	-12.0267	2.57138e-33	3.29644e-32
CNAG_02117	1475.86	0.227709	0.120519	1.88941	0.058837	0.0811493
CNAG_02118	9628.95	-2.62316	0.150301	-17.4527	3.28481e-68	1.05929e-66
CNAG_02119	3226.17	0.240359	0.0738883	3.253	0.00114193	0.00201802
CNAG_02120	13710.1	1.57564	0.100688	15.6488	3.38571e-55	8.1887e-54
CNAG_02121	2385.14	-0.771601	0.193727	-3.98293	6.80707e-05	0.000138845
CNAG_02122	5530.9	0.596966	0.104037	5.73799	9.58049e-09	2.85595e-08
CNAG_02123	3035.16	0.0106421	0.0665729	0.159857	0.872994	0.898016
CNAG_02124	3805.48	-0.401871	0.10797	-3.72207	0.000197594	0.000384647
CNAG_02125	2874.03	0.408897	0.0945323	4.32548	1.52203e-05	3.33771e-05
CNAG_02126	2183.5	0.0157958	0.115874	0.13632	0.891569	0.914993
CNAG_02127	3833.17	0.510588	0.091284	5.5934	2.22664e-08	6.4236e-08
CNAG_02128	17996.1	0.430329	0.0990957	4.34256	1.40833e-05	3.10227e-05
CNAG_02129	64295.3	-0.936712	0.265726	-3.5251	0.00042332	0.000789338
CNAG_02130	27769.7	-0.737298	0.0662676	-11.1261	9.36603e-29	9.86397e-28
CNAG_02131	2152.2	-1.00666	0.131452	-7.65802	1.88824e-14	8.68925e-14
CNAG_02132	2934.48	-1.56962	0.269231	-5.83002	5.54199e-09	1.68405e-08
CNAG_02133	10659.6	-0.315117	0.0905784	-3.47894	0.000503409	0.000930953
CNAG_02134	7102.57	0.0596277	0.0868438	0.686608	0.49233	0.551823
CNAG_02135	1376.07	0.0806766	0.116846	0.690454	0.489909	0.549628
CNAG_02136	2584.28	0.774222	0.104307	7.42256	1.14879e-13	5.00155e-13
CNAG_02137	6322.05	-0.347192	0.113703	-3.0535	0.00226189	0.00383903
CNAG_02138	7796.26	0.522185	0.093419	5.58971	2.27448e-08	6.55251e-08
CNAG_02139	7198.47	-0.273314	0.0858235	-3.1846	0.00144952	0.00252619
CNAG_02140	4707.4	-0.0169976	0.095833	-0.177367	0.85922	0.887267
CNAG_02141	3201.79	2.28579	0.120875	18.9103	9.37523e-80	3.67934e-78
CNAG_02143	3784.3	1.21358	0.119573	10.1493	3.33841e-24	2.73921e-23
CNAG_02144	75143.9	0.57256	0.0764696	7.48741	7.02453e-14	3.12368e-13
CNAG_02145	3456	0.25893	0.0801208	3.23175	0.00123036	0.00216418
CNAG_02146	53.7011	-0.261518	0.431508	-0.606056	0.544477	0.60224
CNAG_02147	621.091	-1.57807	0.166635	-9.47024	2.79212e-21	1.94723e-20
CNAG_02148	1989.48	-0.406351	0.0892992	-4.55044	5.35329e-06	1.23071e-05
CNAG_02149	663.123	0.214951	0.229225	0.937731	0.348383	0.407671
CNAG_02150	2179.27	-0.886491	0.0873161	-10.1527	3.22444e-24	2.6483e-23
CNAG_02151	5082.95	-0.113505	0.0921496	-1.23175	0.218043	0.268679
CNAG_02152	12292.1	0.243633	0.0724766	3.36155	0.000775074	0.00140309
CNAG_02153	6282.02	-0.0733224	0.0713707	-1.02735	0.304258	0.361787
CNAG_02154	3472.58	0.0578495	0.0987759	0.585664	0.558101	0.614857
CNAG_02155	2318.82	0.590142	0.157077	3.75701	0.000171955	0.000337182
CNAG_02156	17730.5	-0.385782	0.066597	-5.79279	6.92269e-09	2.08684e-08
CNAG_02157	1804.66	-0.385695	0.126102	-3.05859	0.00222383	0.00377983
CNAG_02159	8849.54	0.687587	0.08663	7.93706	2.07029e-15	1.01025e-14
CNAG_02160	772.76	-0.807608	0.127482	-6.33508	2.37218e-10	8.05572e-10
CNAG_02161	7826.81	0.546714	0.0879098	6.21903	5.00241e-10	1.65817e-09
CNAG_02162	4623.16	0.575914	0.116254	4.95392	7.27346e-07	1.82605e-06
CNAG_02163	1202.74	-0.417999	0.11058	-3.78005	0.000156795	0.000308692
CNAG_02164	22103.6	-0.819729	0.0704838	-11.63	2.89959e-31	3.38465e-30
CNAG_02165	4424.82	-0.119197	0.148923	-0.800395	0.423482	0.483847
CNAG_02166	19977.3	0.173871	0.0613415	2.83448	0.00459002	0.00746607
CNAG_02167	1741.66	-0.512381	0.129629	-3.95268	7.72803e-05	0.000156784
CNAG_02168	15119.4	-0.497175	0.0923311	-5.3847	7.25675e-08	1.99327e-07
CNAG_02169	2479.67	-0.84709	0.132494	-6.39341	1.62226e-10	5.55899e-10
CNAG_02170	1673.5	-1.24257	0.202199	-6.1453	7.98135e-10	2.59495e-09
CNAG_02171	4918.99	1.06791	0.070562	15.1344	9.60934e-52	2.13199e-50
CNAG_02172	7646.64	0.147856	0.0964675	1.5327	0.125349	0.162599
CNAG_02173	1878.13	-0.724889	0.109533	-6.61799	3.64108e-11	1.31426e-10
CNAG_02174	6956.08	0.262639	0.0857792	3.0618	0.00220008	0.00374329
CNAG_02175	7027.62	-0.139363	0.0720259	-1.9349	0.0530027	0.0735216
CNAG_02176	114646	-1.17111	0.0637009	-18.3845	1.74878e-75	6.38152e-74
CNAG_02177	18919.4	0.061855	0.0552729	1.11908	0.263105	0.317527
CNAG_02178	4526.6	0.303884	0.0848639	3.58083	0.000342498	0.000646311
CNAG_02179	9225.46	-0.845107	0.0975998	-8.6589	4.76333e-18	2.75215e-17
CNAG_02180	6653.43	0.0270611	0.0821525	0.329401	0.741853	0.782581
CNAG_02181	3423.68	0.785468	0.0887537	8.84998	8.75378e-19	5.31229e-18
CNAG_02182	37414.5	1.31326	0.130604	10.0552	8.71105e-24	7.00928e-23
CNAG_02183	11154.9	-0.661381	0.081662	-8.09901	5.54103e-16	2.81277e-15
CNAG_02184	216.598	-0.20724	0.267122	-0.775827	0.437851	0.498143
CNAG_02185	7483.46	0.678641	0.114114	5.94707	2.72988e-09	8.52255e-09
CNAG_02186	950.627	-0.0143205	0.166438	-0.0860409	0.931434	0.947375
CNAG_02187	3216.23	-0.131551	0.0828055	-1.58867	0.112134	0.146807
CNAG_02188	9197.81	-1.2052	0.111286	-10.8297	2.48868e-27	2.48271e-26
CNAG_02189	74239.9	-0.477961	0.0504564	-9.47275	2.72578e-21	1.90256e-20
CNAG_02190	2595.69	0.470316	0.262604	1.79097	0.0732981	0.0993387
CNAG_02191	2423.95	0.344492	0.114382	3.01178	0.00259725	0.00437077
CNAG_02192	1666.4	0.256228	0.123271	2.07857	0.0376568	0.0538787
CNAG_02193	1922.67	0.190277	0.127411	1.49342	0.135328	0.174455
CNAG_02194	4489.42	-0.570873	0.121594	-4.69491	2.6672e-06	6.3385e-06
CNAG_02195	3770.27	0.580208	0.113477	5.113	3.17085e-07	8.22877e-07
CNAG_02196	7870.2	0.282076	0.0947058	2.97845	0.00289715	0.00483439
CNAG_02197	6546.7	0.559806	0.0641061	8.73249	2.49134e-18	1.46694e-17
CNAG_02198	433.414	0.0624286	0.141492	0.441217	0.659056	0.708809
CNAG_02199	1177.86	-0.142005	0.152634	-0.930359	0.352185	0.411369
CNAG_02200	6115.22	-0.739733	0.104905	-7.05147	1.7704e-12	7.07142e-12
CNAG_02201	2683.45	-0.431704	0.11768	-3.66846	0.000244013	0.000468973
CNAG_02202	9488.62	0.58516	0.100696	5.81116	6.20429e-09	1.87844e-08
CNAG_02203	2685.87	-0.513424	0.0825262	-6.22135	4.92909e-10	1.63517e-09
CNAG_02204	2483.77	0.0595912	0.126752	0.47014	0.638255	0.689737
CNAG_02205	2006.81	-1.62239	0.100764	-16.1009	2.51244e-58	6.69985e-57
CNAG_02206	1077.67	0.0513966	0.12779	0.402195	0.687541	0.735262
CNAG_02207	3243.33	0.0894448	0.115123	0.776954	0.437186	0.497591
CNAG_02208	22040.5	0.233837	0.123373	1.89536	0.0580451	0.080142
CNAG_02209	25967.1	0.687314	0.101931	6.74291	1.55247e-11	5.74834e-11
CNAG_02210	2756.44	-1.0836	0.100081	-10.8272	2.55825e-27	2.54601e-26
CNAG_02211	1776.86	-1.14822	0.182777	-6.28207	3.34089e-10	1.12088e-09
CNAG_02212	28020.4	0.642587	0.0995379	6.4557	1.07716e-10	3.7404e-10
CNAG_02213	5721.91	-0.841819	0.121307	-6.93958	3.93275e-12	1.53473e-11
CNAG_02214	6148.13	-0.667401	0.0880526	-7.57957	3.46698e-14	1.56938e-13
CNAG_02215	5295.05	-0.798335	0.107004	-7.46079	8.60056e-14	3.79008e-13
CNAG_02216	9782.28	0.419189	0.134081	3.12639	0.00176966	0.00305468
[truncated: 6,339 more rows]
