# Supplementary material for: The fungal pathogen Cryptococcus neoformans adapts to the host environment through TOR-mediated remodeling of phospholipid asymmetry
Source: Research Square preprint supplement (doi:10.21203/rs.3.rs-2828872/v1), 2023-04-25
Supplement: Supplementary file 5 [file c3fb4e11d16dd1fa7c892a93.xlsx]

## Sheet: Nanostring Probset (CO2)
Count	Gene ID	Name
1	CNAG_00039	Zinc finger C2H2-type
2	CNAG_00097	myo-inositol transporter, putative
3	CNAG_00414	Maintenance of killer protein 32, putative
4	CNAG_00444	hypothetical protein
5	CNAG_00883	Putative Zn2-Cys6 zinc-finger transcription factor
6	CNAG_01243	histone-lysine N-methyltransferase, H3 lysine-4 specific
7	CNAG_02532	FAD dependent oxidoreductase
8	CNAG_03050	FAD dependent oxidoreductase
9	CNAG_03159	Ankyrin repeat-containing domain
10	CNAG_03227	Arv1 protein
11	CNAG_03567	RAM signaling network protein kinase, putative
12	CNAG_04213	signal transducer
13	CNAG_04243	cell division control protein 24
14	CNAG_04655	rab family protein
15	CNAG_04951	3-deoxy-7-phosphoheptulonate synthase
16	CNAG_05159	hypothetical protein
17	CNAG_05451	hypothetical protein
18	CNAG_05558	CAMK/CAMKL/KIN4 protein kinase
19	CNAG_05678	Acetate transporter GPR1/FUN34/SatP family
20	CNAG_06373	mitotic spindle assembly checkpoint protein MAD2B
21	CNAG_06583	hypothetical protein
22	CNAG_07358	hypothetical protein
23	CNAG_01463	hypothetical protein
24	CNAG_01464	Flavohemoglobin
25	CNAG_01469	CDP-diacylglycerol-serine O- phosphatidyltransferase
26	CNAG_01487	Zn2/Cys6 DNA-binding domain
27	CNAG_04096	racemase
28	CNAG_04417	alpha-ketoglutarate-dependent 2,4- dichlorophenoxyacetate dioxygenase
29	CNAG_05551	GAMMA TUBULIN COMPLEX PROTEIN
30	CNAG_05755	protein MAK16
31	CNAG_05757	AT hook, DNA-binding motif
32	CNAG_06182	minichromosome maintenance protein 4 (cell division control protein 54)
33	CNAG_06529	TRANS-1,2-DIHYDROBENZENE-1,2-DIOL DEHYDROGENASE
34	CNAG_00440	Ssn801
35	CNAG_06092	Cln1
36	CNAG_02095	Clb3/Cbc1
37	CNAG_00183	Pcl2
38	CNAG_00442	Pcl9
39	CNAG_03385	Pcl103
40	CNAG_06534	HMG1
41	CNAG_06829	ERG1
42	CNAG_00040	ERG11
43	CNAG_01737	ERG25
44	CNAG_03819	ERG6
45	CNAG_00519	ERG3
46	CNAG_04804	SRE1
47	CNAG_01242	HAPX
48	CNAG_07873	CSH1
49	CNAG_07749	TSC10
50	CNAG_03080	ELO2
51	CNAG_01477	LCB2
52	CNAG_06165	TSC11
53	CNAG_04283	FLC3
54	CNAG_00897	SKN1
55	CNAG_02487	PHS1
56	CNAG_04453	AUR1
57	CNAG_05692	YSR3
58	CNAG_07730	Tricarboxylic acid Transporter
59	CNAG_02045	KBC
60	CNAG_02288	Mitochondrial Citrate Transporter
61	CNAG_05303	Isocitrate Lyase
62	CNAG_07316	hydroxyacid-oxoacid transhydrogenase
63	CNAG_06499	DPP101
64	CNAG_04256	hypothetical protein
65	CNAG_01542	Taurine Dioxygenase
66	CNAG_00777	CCR4-NOT transcriptional complex subunit CAF120
67	CNAG_05835	LIV3
68	CNAG_04496	RabGTPase activator
69	CNAG_01882	Histone Methyltransferase
70	CNAG_02060	hypothetical protein
71	CNAG_07799	ABC transporter
72	CNAG_00331	anon-23da protein
73	CNAG_05387	Galactose Transporter
74	CNAG_02751	short-chain dehydrogenase
75	CNAG_03495	hypothetical protein
76	CNAG_07902	AAT family amino acid transporter
77	CNAG_03346	bZip transcription factor, putative
78	CNAG_04098	PDR-5
79	CNAG_06169	hypothetical protein
80	CNAG_00866	Transketolase
81	CNAG_06291	FPD1, Cda4
82	CNAG_03910	ITR6
83	CNAG_01945	oxidoreductase
84	CNAG_02781	Dihydrodipocholinate synthetase
85	CNAG_04346	Dihydrodipocholinate synthetase
86	CNAG_01341	ISP3
87	CNAG_00834	phosphatidylserine decarboxylase, variant
88	CNAG_05077	glycosyl hydrolase
89	CNAG_00269	Sorbitol Dehydrogenase
90	CNAG_02849	glutathione transferase
91	CNAG_04355	hypothetical protein
92	CNAG_03369	SWE102
93	CNAG_06916	hypothetical protein
94	CNAG_02491	nuclear protein
95	CNAG_03284	hypothetical protein
96	CNAG_06252	CCD6
97	CNAG_01810	RPA12
98	CNAG_02455	Choline Transporter
99	CNAG_03526	Chromosome Transmission Fidelity-8
100	CNAG_04899	cytoplasmic protein
101	CNAG_03474	EncT
102	CNAG_03129	Transcription Factor IIIA
103	CNAG_05968	CDC420
104	CNAG_05571	U3 small nucleolar RNA-associated protein 20
105	CNAG_03302	protein LTV1
106	CNAG_05333	Likely Transcription Factor (XlnR)
107	CNAG_04216	Upstream of PEP Carboxykinase
108	CNAG_01075	methylmalonate-semialdehyde dehydrogenase (acylating)
109	CNAG_02553	Short-chain dehydrogenase
110	CNAG_02722	aldose reductase
111	CNAG_02991	cofilin
112	CNAG_00816	microtubule binding protein
113	CNAG_00279	Mitochondrial protein
114	CNAG_03358	Phosphoglycerate kinase
115	CNAG_06125	TEF1
116	CNAG_00483	ACT1
117	CNAG_06746	H2B
118	CNAG_06699	GPD1

## Sheet: Raw and processed results
Probe Name	Avg Count	Min Count	Max Count	%CV	Annotation	A1-38-2 Amb 1	A1-38-2 Amb 2	A1-38-2 Amb 3	A1-38-2 CO2 1	A1-38-2 CO2 2	A1-38-2 CO2 3	A2-102-5 Amb 1	A2-102-5 Amb 2	A2-102-5 Amb 3	A2-102-5 CO2 1	A2-102-5 CO2 2	A2-102-5 CO2 3	A1-35-8 Amb 1	A1-35-8 Amb 2	A1-35-8 Amb 3	A1-35-8 CO2 1	A1-35-8 CO2 2	A1-35-8 CO2 3	C23 Amb 1	C23 Amb 2	C23 Amb 3	C23 CO2 1	C23 CO2 2	C23 CO2 3	A1-84-14 Amb 1	A1-84-14 Amb 2	A1-84-14 Amb 3	A1-84-14 CO2 1	A1-84-14 CO2 2	A1-84-14 CO2 3	H99 Amb 1	H99 Amb 2	H99 Amb 3	H99 CO2 1	H99 CO2 2	H99 CO2 3
CNAG_00039	404	255	537	25.93	ZFC6	3103	2897	3360	3893	3700	3592	2553	2767	4118	3791	4053	3390	1376	1656	2221	1972	2118	2624	2523	2183	2662	2334	2119	2519	596	1048	1027	815	1367	1330	979	650	749	1171	845	1143
CNAG_00040	792	609	1088	25.02	ERG11	3664	3586	4223	4605	4191	3668	3632	4256	5919	4422	4978	4118	1459	1671	1836	1904	1909	2437	5539	4484	5719	4680	4226	5031	1036	2304	2305	2332	3893	3647	1145	844	948	1639	1191	1553
CNAG_00097	400.67	244	588	30.89	ITR1	1469	1514	1689	2068	1913	1827	1890	1928	2153	2399	2643	2087	732	949	977	1112	1199	1274	1654	1257	1621	2084	1857	2169	646	827	741	748	1136	1063	278	176	198	470	329	445
CNAG_00183	505	429	676	18.41		2222	2169	2644	1801	1694	1636	1213	1293	1862	1030	1094	920	984	1177	1263	942	928	1148	1931	1715	2355	1893	1665	1913	686	1020	999	687	1104	970	509	363	458	639	420	587
CNAG_00269	16.83	11	20	18.18		31	38	35	29	30	17	78	76	91	150	138	121	28	17	12	14	14	19	36	26	36	49	36	53	16	12	18	17	27	16	12	6	12	11	15	13
CNAG_00279	1295.5	1055	1453	11.13		2705	2863	3362	2816	2646	2473	2248	2260	3225	2321	2713	2201	1287	1595	1587	1408	1434	1741	3340	2770	3690	3236	2782	3335	2249	1414	1239	1079	1543	1566	678	492	586	680	452	614
CNAG_00331	716.33	328	1109	43.47		1281	1216	1341	3574	3292	3110	854	890	1356	2394	2451	2098	577	687	673	1787	1764	2130	1433	1147	1275	2499	2244	2558	1012	1513	1416	1676	2603	2619	439	304	324	1619	1122	1473
CNAG_00414	88.33	73	110	17.5	MAK32	150	142	151	86	113	108	183	154	217	246	248	205	85	92	95	73	91	73	221	188	213	226	215	227	54	99	76	82	131	134	88	69	68	122	66	115
CNAG_00440	154.33	128	181	13.12	SSN801	320	371	387	508	446	478	297	328	547	402	461	348	180	177	204	253	276	343	461	365	457	545	422	562	373	234	214	206	319	267	139	66	80	133	112	146
CNAG_00442	215.17	68	409	65.02		2000	2152	2337	5021	4412	4176	5026	5319	7531	8661	8685	7333	1135	1075	1377	2448	2712	3421	1956	1517	1626	3006	2881	3437	1246	2121	2054	2176	3602	3286	240	160	186	891	638	821
CNAG_00444	1037.33	693	1475	25.66		260	230	211	271	241	253	286	325	447	440	522	391	105	122	113	139	128	154	406	359	462	586	485	640	849	315	293	306	416	337	239	156	167	226	145	209
CNAG_00483	2301.17	1588	3735	33.62	ACT1	7457	7336	8114	6491	6149	5794	4885	5101	7364	6003	6473	5048	3169	3639	4260	3355	3424	4040	10333	9545	12505	8378	7800	8901	2724	3605	3371	3193	4951	4377	3595	2269	2710	2924	2175	3093
CNAG_00519	612.67	343	1060	40.96	ERG3	1713	1516	1689	1313	1253	1237	1112	1246	1593	1137	1418	1012	756	958	1030	738	695	881	2107	1766	2273	1899	1646	2152	511	542	520	584	808	759	534	362	412	623	412	620
CNAG_00777	637.83	358	921	33.77		4286	4415	5120	6878	6967	6801	3720	3846	5602	5706	5919	5084	1875	2360	2919	3565	3501	4819	2995	2754	3271	3980	3368	3984	741	1308	1321	1270	2044	1923	1375	978	1218	1469	1003	1541
CNAG_00816	11893.2	8843	18199	30.33		13668	14986	17505	17333	16903	16923	15765	16638	22446	18023	22103	16033	7325	9491	9778	9229	10037	10962	11895	12280	14966	16642	13924	16157	20211	5778	5260	5337	7112	6458	3078	1890	2303	4532	2847	4142
CNAG_00834	218.67	72	429	67.99		419	426	533	111	102	90	102	109	137	63	74	63	125	213	203	58	48	68	645	701	1233	289	266	310	47	43	29	30	60	46	226	145	193	112	58	92
CNAG_00866	1913	822	3518	57.11		7905	8178	9838	2683	2534	2485	2095	2476	3148	1454	1560	1297	3076	4182	4339	1495	1735	1792	8071	8278	13016	3997	3599	4020	1207	1177	1049	869	1200	1238	2522	1519	1814	1222	760	1259
CNAG_00883	1027.83	671	1320	26.04	ECM2201	7872	8054	9961	9245	9060	8670	6905	7299	10158	8442	9086	7694	4253	5076	5661	4887	5411	6145	5095	4445	5221	6096	5124	5864	2743	3506	3443	2562	3806	3738	1299	891	1095	2647	1809	2516
CNAG_00897	7486.33	5894	9104	18.24	SKN1	16642	16469	19899	17480	17392	15486	9259	9776	13226	11285	12959	10062	8694	11660	12268	9515	10077	11959	21834	19531	25162	26313	20119	25136	7817	9800	9094	8819	12792	11708	7085	4533	5344	8916	5630	6731
CNAG_01075	27.17	23	35	17.17		52	63	70	113	92	90	45	59	66	83	106	84	26	33	28	51	50	53	109	71	114	136	83	117	28	29	23	24	47	39	34	14	16	51	27	32
CNAG_01242	609.17	382	915	32.76	HAPX	1288	1231	1488	2895	2719	2608	1391	1443	1887	2595	3038	2702	796	895	891	1625	1847	2148	1279	1187	1454	2265	1909	2194	311	453	439	519	837	772	593	382	471	673	452	588
CNAG_01243	278.5	204	369	20.17	SET101	1146	1139	1390	1802	1800	1597	918	982	1346	1225	1334	1157	517	625	769	870	949	1138	1186	1013	1121	1274	1078	1354	440	567	485	514	827	729	391	255	308	460	333	411
CNAG_01341	1406.17	818	2151	42.43	ISP3	1049	1142	1348	814	791	783	245	271	322	266	281	209	365	463	535	398	440	475	2035	2096	3722	721	616	744	334	200	172	149	212	222	1084	669	805	610	395	660
CNAG_01463	452.67	309	672	29.27		832	883	908	1227	1117	1066	1035	993	1289	1281	1376	1125	474	506	631	696	744	910	999	775	868	1231	1019	1217	835	560	516	408	684	600	228	182	181	352	292	350
CNAG_01464	163	76	297	52.6	FHB1	424	383	488	232	218	212	291	342	392	206	235	193	175	209	230	126	146	162	1137	1067	2517	460	373	422	108	138	126	95	155	136	1159	735	844	308	221	379
CNAG_01469	199.67	161	242	14.18		1055	1067	1256	1193	1222	1163	492	571	744	773	703	598	558	611	614	633	633	837	1244	967	1242	1223	1072	1268	300	661	575	555	876	761	279	176	243	331	226	338
CNAG_01477	630.17	507	804	21.22		2434	2402	2761	3866	3556	3341	2110	2184	3142	2857	3143	2478	1070	1227	1361	1779	1931	2336	2894	2590	3589	3746	3050	3742	1104	1472	1482	1590	2291	2135	815	479	645	954	621	912
CNAG_01487	55	41	77	24.64		151	170	203	133	129	136	73	89	126	95	99	89	76	83	89	83	86	92	128	111	119	128	135	177	53	73	89	72	117	99	85	70	51	80	70	86
CNAG_01542	1594.67	1033	2801	40.1		1093	1292	1540	6279	6238	6645	2070	2340	2776	5190	6348	5017	520	627	698	3061	3180	3734	1777	1967	2441	2590	2267	2561	1376	1728	1704	2266	3199	2686	1528	1008	1095	2780	1759	2670
CNAG_01737	2355.67	1465	4013	39.2	ERG25	5859	5893	6970	8151	7489	6911	4769	5387	7566	6328	7517	6397	2347	2797	3599	3540	3515	4480	10222	8662	11972	8369	7291	9079	2194	3734	3417	3968	6682	5748	3137	2312	2893	3089	2148	2896
CNAG_01810	304.83	89	524	69.4		61	64	60	94	56	85	61	68	81	59	60	67	35	41	57	52	51	48	260	256	349	163	129	151	128	71	82	78	114	115	260	180	172	203	133	190
CNAG_01882	153.33	100	223	27.99		440	471	583	1306	1283	1297	572	582	768	919	1138	937	229	280	310	612	692	809	575	623	605	874	776	850	243	278	307	323	502	442	149	100	106	272	156	220
CNAG_01945	87.67	70	115	19.35		102	116	128	101	106	76	77	81	102	66	56	62	64	75	58	51	60	71	158	179	210	194	153	175	46	60	66	23	43	36	54	43	33	74	37	75
CNAG_02045	75.5	31	107	39.29		98	142	169	566	526	450	154	123	162	461	599	474	22	36	42	216	235	277	240	244	258	546	500	678	173	169	153	169	256	265	41	29	45	65	40	56
CNAG_02060	247.33	136	382	37.82		60	44	37	108	88	81	89	90	94	173	219	185	17	30	14	42	49	59	212	180	230	269	210	280	183	363	389	1186	1703	1715	231	130	177	512	376	461
CNAG_02095	524	352	724	27.37		570	531	576	489	513	459	310	350	444	408	457	345	260	311	283	289	326	354	1372	1256	1683	1168	1016	1286	620	836	842	794	1165	1216	475	334	403	509	335	507
CNAG_02288	71.17	58	91	19.6		352	471	646	865	849	781	440	451	599	685	802	698	191	170	200	404	443	535	482	404	465	904	837	1049	236	392	394	294	502	415	64	40	55	63	48	62
CNAG_02455	568.83	241	1000	51.45		1634	1801	2133	2778	2521	2906	519	567	707	716	730	611	925	1178	1321	1422	1458	1800	1448	1374	1664	2009	1737	1920	717	1156	1206	1018	1626	1453	1884	1402	1583	1863	1387	2199
CNAG_02487	141.33	115	199	23	PHS1	541	639	747	825	822	714	597	635	870	833	863	627	341	345	481	441	446	504	689	594	744	780	669	841	156	340	304	318	477	458	221	125	171	208	129	206
CNAG_02491	130.17	94	163	17.3		185	157	198	207	156	179	191	183	259	220	251	188	88	103	146	112	113	140	313	213	325	220	197	217	222	121	108	108	163	172	95	50	71	97	55	92
CNAG_02532	477.5	229	801	47.28		3385	3312	3816	4802	4414	4153	2686	2880	3632	3544	3755	3063	1863	2238	2234	2523	2613	3063	2007	1564	1688	4044	3739	4341	1853	1560	1598	1712	2567	2359	272	132	176	605	385	509
CNAG_02553	94.17	76	123	23.05		202	214	255	652	585	565	36	48	64	91	88	109	88	134	121	265	298	332	259	251	319	458	319	454	193	126	91	161	176	166	90	59	69	135	97	141
CNAG_02722	1138.5	668	1665	34.49		2670	2711	3291	1215	1244	1124	1252	1293	2029	1005	1221	975	1038	1472	1535	657	716	748	4058	3930	5245	2983	2464	2834	764	691	662	625	959	832	1056	749	918	656	391	688
CNAG_02751	2179.67	587	4144	77.01		2495	2439	2982	277	275	280	222	203	265	103	136	104	871	1531	1632	179	188	203	3803	4058	8559	545	485	479	142	114	103	66	105	94	2368	1278	1708	727	373	626
CNAG_02781	74.17	61	103	20.33		77	84	75	57	59	51	50	42	48	58	86	58	49	58	40	27	48	51	105	79	109	121	87	109	48	24	27	28	35	45	39	35	39	104	57	78
CNAG_02849	60.67	45	76	22.71		34	36	47	61	61	41	42	46	52	53	43	39	30	59	38	41	50	57	116	50	94	74	63	62	49	28	31	38	70	75	57	37	40	54	37	56
CNAG_02991	8417.5	6381	9704	14.34		11442	11468	13583	9039	8770	8722	8413	8383	11656	8456	9741	7557	5668	7270	7533	5190	5674	5910	14082	12942	17433	12888	10721	12323	8337	5384	4738	4193	5895	5495	3704	2435	2959	4109	2575	4122
CNAG_03050	135.83	91	168	25.41		249	232	254	479	404	406	243	207	318	389	420	345	90	119	118	189	223	281	313	251	301	449	400	496	122	147	111	141	188	192	91	61	77	137	87	129
CNAG_03080	804.5	560	1372	38.52		1342	1253	1505	1375	1365	1336	731	691	916	1051	992	908	732	867	847	756	788	893	2093	1883	2782	1975	1726	2018	701	1239	1112	1321	2025	1978	933	595	655	827	572	856
CNAG_03129	465.5	352	713	28		630	640	696	1213	1108	1123	762	758	986	922	1000	826	310	364	395	583	631	752	1053	931	1205	1244	1027	1119	572	485	496	468	661	613	461	330	371	498	342	516
CNAG_03159	359.17	219	462	25.23		235	252	281	298	321	291	208	232	370	253	337	242	120	171	166	158	177	234	430	440	577	492	351	398	446	186	182	214	254	248	203	142	137	215	126	181
CNAG_03227	1069	619	1577	37.25		3483	3886	4549	8918	8587	8828	3500	3505	5134	8934	10456	8315	2103	2588	2573	4380	4401	5499	2822	2546	3367	4365	3767	4237	1025	900	848	1425	2068	1979	1194	741	910	1928	1389	2063
CNAG_03284	344.83	221	489	36.04		427	389	436	924	918	877	486	542	826	872	961	821	245	281	314	484	520	605	803	702	978	781	665	791	503	396	419	444	594	565	356	260	271	354	233	339
CNAG_03302	164.17	79	301	55.86		113	92	99	185	193	161	66	90	93	101	110	94	59	85	101	125	111	124	458	298	511	214	171	244	98	121	135	120	172	167	230	131	135	185	113	180
CNAG_03346	230.17	96	423	61.64	BZP4	248	283	325	266	269	261	165	129	135	86	96	79	123	117	103	127	161	173	2167	1701	2518	509	438	530	91	68	78	39	51	62	354	259	312	185	134	229
CNAG_03358	1557.5	969	2430	33.67		5856	5902	6595	4851	4692	4550	4335	4252	5422	4432	4808	3746	3085	3738	3957	2755	2941	3315	5508	4724	6227	5337	4609	5396	1422	2270	2231	1694	2434	2165	2498	1595	1862	2177	1516	2178
CNAG_03369	118.17	76	148	26.17	SWE102	185	198	187	133	118	101	106	129	127	125	139	109	69	92	76	61	68	75	706	486	774	361	344	395	83	226	234	222	351	375	150	100	121	143	101	131
CNAG_03385	4438.83	2205	8036	51.3	PCL103	2921	2643	2930	457	452	425	366	327	449	178	187	192	834	1091	1167	211	240	287	8599	6643	10145	3841	3248	3933	2452	3257	2803	2229	3671	3221	6003	4162	5088	3480	2089	3517
CNAG_03474	64.5	29	122	61.24		58	43	48	66	50	45	31	33	40	43	54	53	28	32	30	31	33	36	101	76	118	87	70	68	32	40	40	33	54	52	90	51	70	70	51	66
CNAG_03495	54.83	25	100	49.84		254	241	302	62	46	43	43	56	65	28	37	41	85	111	151	37	34	36	596	442	880	102	64	108	16	24	15	17	19	25	102	63	60	39	20	32
CNAG_03526	107.17	84	145	22.67		168	181	197	175	132	155	101	110	148	128	138	100	66	114	117	76	74	97	187	147	214	261	206	250	139	126	122	107	185	171	99	77	98	87	62	100
CNAG_03567	671.33	510	880	20.42	CBK1	2045	2034	2296	1739	1793	1761	1471	1389	2065	1653	1836	1534	934	1233	1222	962	1060	1250	1986	2080	2494	2593	2192	2562	834	1064	936	914	1306	1151	723	518	593	774	464	706
CNAG_03819	776.5	666	857	8.14	ERG6	1487	1605	1703	1388	1372	1335	1181	1312	2022	1353	1572	1255	707	908	887	735	821	893	2337	2257	2724	2040	1722	2064	916	855	759	615	984	953	577	370	534	696	515	754
CNAG_03910	304	256	378	15.37	ITR6	335	371	430	190	190	182	119	138	143	82	88	78	192	265	242	119	165	165	970	929	1699	417	426	470	119	132	115	49	79	60	279	217	256	308	158	228
CNAG_04096	112.33	89	153	22.88		528	547	663	759	682	691	854	867	1191	815	864	722	214	228	215	302	351	375	421	405	403	1104	1052	1293	296	465	414	346	547	479	104	76	87	168	103	144
CNAG_04098	869.67	245	1600	70.38	PDR5-2	430	429	482	432	415	434	195	190	260	221	260	211	141	173	209	175	157	276	1519	1378	3102	563	483	611	198	225	217	184	319	318	1223	840	1024	599	427	679
CNAG_04213	679.5	509	947	24.03		4328	4197	4925	5666	5486	5206	3950	3998	5134	5256	5517	4990	2004	2607	2608	2857	3146	3646	3279	3175	3729	5120	4505	5037	1203	2808	2676	2750	4094	4145	796	554	636	1412	917	1293
CNAG_04216	32.5	21	41	23.41		52	49	34	92	84	78	37	34	24	62	79	51	20	33	24	48	42	54	86	65	105	115	98	139	33	21	40	51	89	77	18	9	13	27	14	30
CNAG_04243	277.17	185	370	24.17	CDC24	405	450	488	364	358	344	179	220	285	171	141	157	177	210	275	197	176	244	828	748	870	794	754	799	244	420	408	577	822	804	525	380	408	447	364	528
CNAG_04256	397.33	344	492	14.65	LPI6	1033	1127	1284	1607	1581	1567	899	919	1336	1342	1524	1177	474	642	642	817	882	1058	919	913	1056	1482	1273	1470	443	474	450	454	654	610	409	273	330	369	254	379
CNAG_04283	1507.33	975	2202	29.16		6125	5877	7377	6081	5621	5293	5271	5782	8844	7017	7474	6339	3059	4128	4743	3195	3338	3983	6571	5020	7042	5251	4268	5223	1870	2216	2035	1635	2571	2422	1787	1210	1412	2626	1664	2406
CNAG_04346	70.33	60	75	7.82		496	556	586	382	359	294	1075	1121	1491	755	775	631	248	362	324	179	200	223	244	206	233	446	362	491	145	205	189	149	213	179	49	36	60	70	55	85
CNAG_04355	143.67	56	290	66.77		70	68	66	66	80	86	54	68	93	52	68	61	38	46	63	48	48	63	203	166	230	180	104	156	81	97	100	112	137	135	164	96	99	145	82	93
CNAG_04417	564.5	348	912	39.27		381	326	420	592	583	560	73	62	82	107	130	85	197	247	277	327	359	403	613	503	862	976	844	985	219	226	249	296	375	407	590	420	534	733	496	706
CNAG_04453	94.17	62	133	27.84	IPC1	1033	1090	1325	1656	1570	1457	951	1098	1619	1183	1339	1167	428	501	645	727	848	1008	661	680	817	1028	881	1071	191	364	357	357	536	541	129	102	136	217	154	268
CNAG_04496	389.83	316	475	16.16		1890	1933	2127	3345	3077	3013	1522	1671	2465	1426	1556	1327	862	1047	1269	1647	1864	2120	1901	1643	2063	2080	1953	2217	921	1143	1096	1041	1654	1540	793	527	660	960	721	952
CNAG_04655	284.5	173	460	36.93		5056	5162	6384	8029	7897	7605	4411	4779	7447	6641	7310	6255	2680	3489	3940	4522	4719	5497	2459	2525	2741	4344	3570	4160	636	872	823	938	1367	1366	262	184	220	833	512	672
CNAG_04804	1119.5	855	1733	28.59	SRE1	4826	5022	6041	8173	8189	7788	4690	4410	5521	5918	6859	5826	2578	3366	3043	4589	4714	5373	5081	5219	6065	7281	6464	7495	1406	2441	2253	2252	3289	3142	1070	750	929	2022	1207	1827
CNAG_04899	439.5	228	669	43.85		523	481	551	483	513	473	323	349	526	408	532	384	266	327	352	284	294	329	881	810	1162	839	709	752	425	387	359	433	539	546	500	319	372	433	285	432
CNAG_04951	499	421	629	15.6		2037	1938	2187	3676	3581	3154	2239	2215	2989	2712	3030	2660	991	1295	1440	1881	2071	2313	2967	2434	3266	2783	2537	2944	1092	1883	1703	1441	2082	1955	1106	712	832	1426	1098	1457
CNAG_05077	312.17	105	614	69.15	LPI11	591	549	613	241	226	265	176	189	232	242	262	236	227	344	274	156	173	187	924	991	1316	828	708	738	147	174	184	222	300	272	487	308	391	186	105	187
CNAG_05159	4739.33	2628	8130	45.25		5770	6154	7272	8046	7925	7707	3931	3976	4726	5429	6210	4776	3156	3943	4211	4400	4447	5269	5081	3957	4691	5906	4825	5716	5563	2147	1852	1722	2495	2134	1168	741	910	2585	1641	2358
CNAG_05303	23.33	20	27	15.73	ICL1	161	201	314	330	329	348	249	277	383	501	595	502	55	52	65	170	163	246	266	211	225	353	324	447	67	187	188	162	191	225	32	20	16	23	20	30
CNAG_05333	18	12	33	43.18		306	330	365	277	266	232	17	18	26	24	23	25	160	217	222	163	203	229	376	315	379	604	491	566	267	341	344	317	425	434	21	12	13	14	11	12
CNAG_05387	206.17	143	308	29.6		150	168	170	347	298	263	130	149	166	201	197	161	69	86	84	160	145	192	1179	933	1607	340	315	400	68	85	81	87	108	98	185	130	195	139	67	146
CNAG_05451	337.67	305	383	9.33		983	1005	1231	1276	1137	1185	570	667	828	896	948	810	474	599	631	674	663	805	932	846	1045	1075	946	1160	549	530	498	511	747	654	349	215	260	352	265	384
CNAG_05551	111	86	160	23.41		224	195	220	173	183	177	163	174	229	187	178	157	111	113	136	104	92	102	374	254	386	353	282	355	190	142	131	133	209	187	97	66	85	97	70	117
CNAG_05558	325	245	406	18.23	KIN4	1080	1058	1199	1510	1517	1401	973	1073	1194	1140	1288	1112	516	630	775	858	843	1049	1286	1091	1307	1318	1194	1335	376	576	557	570	884	770	493	327	373	513	341	494
CNAG_05571	468.83	217	860	54.04		1610	1439	2021	2092	1928	1974	1017	1165	1682	1072	1162	966	865	1012	1361	1248	1160	1475	2371	2049	2532	2224	1946	2129	631	1196	1128	1084	1616	1581	1092	679	876	961	739	1071
CNAG_05678	853.5	421	1675	58.93		565	630	879	1115	1057	1061	762	808	1235	1477	1829	1435	264	350	417	571	538	620	2197	1858	2940	1875	1762	2098	691	696	745	805	1086	1104	1081	721	843	727	534	784
CNAG_05692	225.17	189	282	14.51	LCB3	635	663	756	749	711	675	599	601	926	839	883	699	325	365	354	386	368	462	888	664	974	823	746	871	254	371	338	332	488	524	285	224	244	284	230	322
CNAG_05755	783.17	367	1306	53.71		482	391	429	1334	1338	1355	458	471	703	748	858	688	225	357	410	867	838	1039	1588	1557	2235	1668	1375	1519	574	829	808	782	1057	1053	1305	879	1017	1182	767	1133
CNAG_05757	632.67	332	987	43.1		311	202	273	960	868	882	298	382	496	411	512	433	148	241	265	505	524	657	665	716	1095	617	506	629	595	376	417	432	530	567	569	412	421	658	383	547
CNAG_05835	1968.17	1415	2432	20.38	LIV3	6861	6109	6798	19607	18521	17255	5747	6356	9204	18379	19032	16631	3227	4096	5053	10587	10756	13728	11288	8071	9656	14215	12090	14463	3570	5529	5248	6976	10573	10060	2495	1601	1847	4575	3347	4621
CNAG_05968	301.17	148	432	30.04	CDC420	133	111	104	102	89	91	86	113	118	129	158	136	45	67	65	59	60	62	334	247	391	210	197	186	339	149	156	256	343	370	138	111	99	92	77	117
CNAG_06092	3496.83	2826	4215	15.18	CLN1	3858	3875	4465	4063	4001	3606	3514	3780	5003	4444	4712	3749	1781	2208	2178	2180	2396	2640	7297	6912	8917	7696	7193	8343	3328	6875	6537	7239	11753	10955	5122	3616	4148	4877	3712	4964
CNAG_06125	17499.3	9554	28842	41.26	TEF1	56136	54061	64806	40861	38256	35572	31888	34514	51261	30477	32900	26444	23276	29499	35902	21072	22005	26650	71219	57406	78558	48288	40849	48508	19730	26819	24790	21391	31158	30812	32461	23500	27083	25036	17997	24566
CNAG_06165	302.67	257	364	14.88		1097	1071	1273	1103	1096	1015	731	748	939	831	898	725	532	586	663	588	638	705	1054	939	1294	1395	1160	1368	449	436	388	392	562	554	337	182	241	397	257	370
CNAG_06169	431	153	896	67.63		1448	1437	1802	558	573	579	364	402	435	304	317	237	552	731	825	334	374	387	1699	1467	2794	561	504	582	193	179	152	149	188	182	681	423	494	317	221	337
CNAG_06182	119.5	81	161	28.46		361	360	410	216	250	197	233	270	444	265	308	240	142	209	241	137	127	161	426	417	539	501	431	535	165	251	253	216	311	286	189	116	138	169	107	165
CNAG_06252	328.83	156	540	54.7	CCD6	383	392	499	458	434	453	267	300	520	240	294	236	238	345	376	312	316	375	716	644	896	763	592	599	243	275	276	242	328	358	396	279	271	406	245	392
CNAG_06291	120.67	54	214	59.87	FPD1	73	74	88	61	66	40	29	27	39	49	62	50	34	33	37	33	29	41	163	138	277	79	67	69	25	17	12	25	38	32	171	98	143	76	42	77
CNAG_06373	126.17	83	183	32.71		513	479	616	507	507	469	763	802	1153	623	650	528	257	324	366	282	286	383	366	404	421	659	580	752	241	213	209	207	288	282	121	100	93	136	89	99
CNAG_06499	719.17	552	908	20.76	DPP101	3946	3994	4693	5794	5649	5589	3782	3932	6071	6462	7971	6211	2053	2551	2886	2835	2935	3616	4017	3753	4661	4906	4108	4786	712	727	780	955	1324	1300	787	523	602	1134	732	1003
CNAG_06529	88	51	114	32.68		3890	4287	5067	1325	1232	1124	3279	3704	4780	1312	1462	1081	1705	2115	2128	699	788	781	1145	1012	900	2216	1989	2387	574	851	800	421	640	569	54	37	42	85	50	64
CNAG_06534	221	159	313	24.62	HMG1	1124	1170	1385	1274	1234	1094	619	704	982	695	831	679	535	639	614	529	635	658	2108	1597	2034	1435	1289	1606	205	473	475	408	690	729	339	252	306	535	373	540
CNAG_06583	56	47	65	11.63		465	613	902	479	473	416	906	1080	1457	572	675	573	193	184	200	179	211	218	408	319	375	481	452	605	126	203	197	134	216	194	48	30	40	56	29	49
CNAG_06699	12932.5	7570	20862	37.84	GPD1	17828	17834	19773	7432	7176	7116	7777	7960	10582	7285	8194	6388	7559	9350	10350	4383	5311	5439	39658	34520	52499	19689	16656	19033	5523	4849	4482	4082	5802	5764	18609	12468	14556	11784	8341	12560
CNAG_06746	5474.17	4503	6406	14.38	H2B	10520	10549	11281	10411	10107	9862	8241	7816	10799	9623	11326	8996	4786	6067	6367	5134	5855	6553	20483	19837	25331	17292	13873	16864	6236	5539	5124	6622	8779	8978	3254	2194	2591	3872	2400	3285
CNAG_06829	429.5	283	636	28.76	ERG1	1656	1589	1694	2288	2217	2015	1284	1347	2030	1987	2224	1747	761	842	973	1033	1134	1371	1952	1758	2228	2078	1730	2124	573	761	731	772	1168	1039	495	333	386	719	505	690
CNAG_06916	219.67	62	398	74.24		104	81	135	73	70	72	65	72	113	73	80	57	63	99	117	52	42	68	305	241	375	158	125	116	93	87	96	77	109	105	265	175	155	206	146	199
CNAG_07316	313.5	215	472	29.98		2076	2143	2600	4617	4424	4198	2138	2205	3151	3851	4673	3766	833	1010	1112	1967	2085	2535	2383	2299	2388	4362	3873	4672	964	1227	1223	1294	1920	1762	265	182	190	459	268	385
CNAG_07358	618.17	453	828	22.27		854	838	954	882	861	722	2442	2543	3292	3056	3460	2829	1619	2091	1951	1847	1902	2163	1641	1570	1911	2608	2230	2565	1327	963	915	805	1168	1109	363	232	294	698	432	604
CNAG_07730	57.33	45	66	13.54		105	134	118	138	103	106	83	103	89	132	151	108	60	76	67	73	75	88	128	100	128	169	100	182	66	76	78	74	110	108	41	27	39	60	27	44
CNAG_07749	293.17	256	335	11.79		880	835	929	953	959	945	761	761	1159	938	1054	817	443	520	566	519	567	667	928	777	996	1223	1090	1253	486	529	516	507	685	669	265	168	208	341	213	288
CNAG_07799	1048.33	199	2602	87.64		15734	17431	20569	64718	63034	61900	17931	18451	25894	40476	46411	37951	9489	10761	11778	35238	35630	44644	9951	9449	8990	22026	20352	23098	3147	4178	4162	6256	9629	9211	922	551	694	7796	5314	7239
CNAG_07873	595.17	333	1001	44.2		956	935	1038	1197	1117	1157	861	922	1395	1035	1190	941	404	512	629	569	586	751	1394	1323	1958	1197	1092	1201	403	588	569	651	1011	845	1082	760	857	766	598	904
CNAG_07902	835.5	436	1365	42.2		3777	3627	4251	1877	1908	1826	1277	1282	1929	1081	1202	945	1726	2490	2399	1015	1193	1232	4519	4057	5115	4009	3529	4003	904	1094	989	692	1023	896	977	585	820	913	526	924
NEG_A	49.33	42	60	12.41		46	37	50	55	49	47	51	61	54	44	47	47	35	50	49	35	44	69	82	34	69	43	35	43	28	51	46	42	52	64	55	45	57	61	33	57
NEG_B	19	11	26	26.42		21	25	21	26	22	25	19	27	22	26	16	28	16	12	12	12	18	23	41	29	46	23	14	32	9	18	17	17	25	22	15	14	19	13	16	18
NEG_C	5.67	3	7	26.57		18	10	12	10	10	8	12	10	12	19	18	11	9	5	9	11	7	10	19	13	20	15	15	13	4	9	8	6	6	6	9	7	7	9	9	3
NEG_D	10.17	4	16	42.38		16	20	12	9	13	21	8	11	5	13	17	14	16	18	13	11	10	9	18	12	23	20	13	28	8	13	16	14	13	14	16	11	5	13	3	14
NEG_E	13.33	7	20	36.33		13	14	13	26	16	20	12	13	17	10	21	14	5	16	12	18	17	17	32	19	29	21	18	19	11	13	16	10	19	7	15	13	11	15	13	16
NEG_F	34.83	29	40	13.76		53	29	33	32	30	33	45	38	21	35	40	30	25	47	39	35	32	32	53	31	59	55	36	53	26	30	27	30	45	27	25	30	22	40	32	34
NEG_G	4.33	1	8	66.35		10	12	5	7	8	10	1	4	6	5	14	5	7	9	2	4	3	5	6	6	13	12	8	10	2	4	11	3	5	6	8	5	4	5	3	2
NEG_H	7	4	10	28.57		23	13	18	12	17	11	8	14	11	17	14	9	7	11	8	9	3	11	27	18	21	23	13	24	1	6	10	11	7	8	10	4	3	13	5	2
POS_A	38133.5	33604	42898	8.33		34003	32538	38165	41402	38411	37072	38142	36280	30473	32029	36844	33335	26763	32974	37000	37383	38343	48061	67945	29635	42739	26015	26649	27900	34973	33957	32134	41209	43532	41642	45034	35388	37601	45449	35500	48113
POS_B	12122	10902	12753	5.97		10389	10103	12214	12448	11817	11429	11971	11661	9023	9563	11183	9852	8916	10674	12097	11916	12759	15204	20078	9045	13114	8337	8494	8617	11010	10824	10237	12839	13302	13012	13821	11308	12504	14939	11124	15634
POS_C	3512.67	3299	3742	5.16		2933	2840	3405	3409	3311	3243	3411	3304	2792	2667	3088	2806	2431	3008	3514	3528	3641	4448	5045	2446	3508	2231	2385	2382	3268	3105	3084	3838	3962	3743	4182	3253	3505	4182	3178	4476
POS_D	784.33	741	828	4.73		639	642	784	837	741	756	795	766	643	654	770	638	606	706	787	804	832	986	1221	596	873	540	589	608	728	693	666	921	876	847	948	808	796	909	756	984
POS_E	154.83	131	175	10.17		137	127	151	160	163	153	155	162	126	113	162	132	122	124	139	140	157	152	291	118	156	99	109	105	151	124	125	142	151	194	190	127	145	182	152	205
POS_F	78.67	71	88	7.35		84	77	88	115	85	92	82	76	76	74	96	79	58	82	79	98	95	116	170	74	127	73	60	94	61	72	75	95	80	86	116	75	82	110	85	112
					Background Average	25	20	20.5	22.125	20.625	21.875	19.5	22.25	18.5	21.125	23.375	19.75	15	21	18	16.875	16.75	22	34.75	20.25	35	26.5	19	27.75	11.125	18	18.875	16.625	21.5	19.25	19.125	16.125	16	21.125	14.25	18.25
					Background SD	15.7843	9.59166	14.5111	16.2958	13.4157	13.2065	18.3692	19.0319	15.6662	13.1523	12.7608	14.0991	10.4608	17.452	16.6304	11.8254	14.6165	20.9011	23.9866	10.0818	20.4869	14.7551	10.556	14.6945	10.3983	15.6022	12.4262	13.1142	18.1108	19.7321	15.4683	14.2472	17.9921	19.2312	12.1743	19.0244
					Avg + 2SD	56.5685	39.1833	49.5222	54.7166	47.4565	48.2879	56.2385	60.3139	49.8323	47.4295	48.8967	47.9483	35.9216	55.9039	51.2609	40.5257	45.9831	63.8023	82.7232	40.4136	75.9739	56.0103	40.1119	57.139	31.9216	49.2044	43.7274	42.8534	57.7215	58.7143	50.0616	44.6194	51.9841	59.5874	38.5987	56.2988
Background Subtraction
CNAG_00039	404	255	537	25.93	ZFC6	3046.43	2857.82	3310.48	3838.28	3652.54	3543.71	2496.76	2706.69	4068.17	3743.57	4004.1	3342.05	1340.08	1600.1	2169.74	1931.47	2072.02	2560.2	2440.28	2142.59	2586.03	2277.99	2078.89	2461.86	564.078	998.796	983.273	772.147	1309.28	1271.29	928.938	605.381	697.016	1111.41	806.401	1086.7
CNAG_00040	792	609	1088	25.02	ERG11	3607.43	3546.82	4173.48	4550.28	4143.54	3619.71	3575.76	4195.69	5869.17	4374.57	4929.1	4070.05	1423.08	1615.1	1784.74	1863.47	1863.02	2373.2	5456.28	4443.59	5643.03	4623.99	4185.89	4973.86	1004.08	2254.8	2261.27	2289.15	3835.28	3588.29	1094.94	799.381	896.016	1579.41	1152.4	1496.7
CNAG_00097	400.67	244	588	30.89	ITR1	1412.43	1474.82	1639.48	2013.28	1865.54	1778.71	1833.76	1867.69	2103.17	2351.57	2594.1	2039.05	696.078	893.096	925.739	1071.47	1153.02	1210.2	1571.28	1216.59	1545.03	2027.99	1816.89	2111.86	614.078	777.796	697.273	705.147	1078.28	1004.29	227.938	131.381	146.016	410.413	290.401	388.701
CNAG_00183	505	429	676	18.41		2165.43	2129.82	2594.48	1746.28	1646.54	1587.71	1156.76	1232.69	1812.17	982.57	1045.1	872.052	948.078	1121.1	1211.74	901.474	882.017	1084.2	1848.28	1674.59	2279.03	1836.99	1624.89	1855.86	654.078	970.796	955.273	644.147	1046.28	911.286	458.938	318.381	406.016	579.413	381.401	530.701
CNAG_00269	16.83	11	20	18.18		1	1	1	1	1	1	21.7615	15.6861	41.1677	102.57	89.1033	73.0517	1	1	1	1	1	1	1	1	1	1	1	1	1	1	1	1	1	1	1	1	1	1	1	1
CNAG_00279	1295.5	1055	1453	11.13		2648.43	2823.82	3312.48	2761.28	2598.54	2424.71	2191.76	2199.69	3175.17	2273.57	2664.1	2153.05	1251.08	1539.1	1535.74	1367.47	1388.02	1677.2	3257.28	2729.59	3614.03	3179.99	2741.89	3277.86	2217.08	1364.8	1195.27	1036.15	1485.28	1507.29	627.938	447.381	534.016	620.413	413.401	557.701
CNAG_00331	716.33	328	1109	43.47		1224.43	1176.82	1291.48	3519.28	3244.54	3061.71	797.762	829.686	1306.17	2346.57	2402.1	2050.05	541.078	631.096	621.739	1746.47	1718.02	2066.2	1350.28	1106.59	1199.03	2442.99	2203.89	2500.86	980.078	1463.8	1372.27	1633.15	2545.28	2560.29	388.938	259.381	272.016	1559.41	1083.4	1416.7
CNAG_00414	88.33	73	110	17.5	MAK32	93.4315	102.817	101.478	31.2834	65.5435	59.7121	126.762	93.6861	167.168	198.57	199.103	157.052	49.0784	36.0961	43.7391	32.4743	45.0169	9.19774	138.277	147.586	137.026	169.99	174.888	169.861	22.0784	49.7956	32.2726	39.1466	73.2785	75.2857	37.9384	24.3806	16.0159	62.4126	27.4013	58.7012
CNAG_00440	154.33	128	181	13.12	SSN801	263.431	331.817	337.478	453.283	398.544	429.712	240.762	267.686	497.168	354.57	412.103	300.052	144.078	121.096	152.739	212.474	230.017	279.198	378.277	324.586	381.026	488.99	381.888	504.861	341.078	184.796	170.273	163.147	261.278	208.286	88.9384	21.3806	28.0159	73.4126	73.4013	89.7012
CNAG_00442	215.17	68	409	65.02		1943.43	2112.82	2287.48	4966.28	4364.54	4127.71	4969.76	5258.69	7481.17	8613.57	8636.1	7285.05	1099.08	1019.1	1325.74	2407.47	2666.02	3357.2	1873.28	1476.59	1550.03	2949.99	2840.89	3379.86	1214.08	2071.8	2010.27	2133.15	3544.28	3227.29	189.938	115.381	134.016	831.413	599.401	764.701
CNAG_00444	1037.33	693	1475	25.66		203.431	190.817	161.478	216.283	193.544	204.712	229.762	264.686	397.168	392.57	473.103	343.052	69.0784	66.0961	61.7391	98.4743	82.0169	90.1977	323.277	318.586	386.026	529.99	444.888	582.861	817.078	265.796	249.273	263.147	358.278	278.286	188.938	111.381	115.016	166.413	106.401	152.701
CNAG_00483	2301.17	1588	3735	33.62	ACT1	7400.43	7296.82	8064.48	6436.28	6101.54	5745.71	4828.76	5040.69	7314.17	5955.57	6424.1	5000.05	3133.08	3583.1	4208.74	3314.47	3378.02	3976.2	10250.3	9504.59	12429	8321.99	7759.89	8843.86	2692.08	3555.8	3327.27	3150.15	4893.28	4318.29	3544.94	2224.38	2658.02	2864.41	2136.4	3036.7
CNAG_00519	612.67	343	1060	40.96	ERG3	1656.43	1476.82	1639.48	1258.28	1205.54	1188.71	1055.76	1185.69	1543.17	1089.57	1369.1	964.052	720.078	902.096	978.739	697.474	649.017	817.198	2024.28	1725.59	2197.03	1842.99	1605.89	2094.86	479.078	492.796	476.273	541.147	750.278	700.286	483.938	317.381	360.016	563.413	373.401	563.701
CNAG_00777	637.83	358	921	33.77		4229.43	4375.82	5070.48	6823.28	6919.54	6752.71	3663.76	3785.69	5552.17	5658.57	5870.1	5036.05	1839.08	2304.1	2867.74	3524.47	3455.02	4755.2	2912.28	2713.59	3195.03	3923.99	3327.89	3926.86	709.078	1258.8	1277.27	1227.15	1986.28	1864.29	1324.94	933.381	1166.02	1409.41	964.401	1484.7
CNAG_00816	11893.2	8843	18199	30.33		13611.4	14946.8	17455.5	17278.3	16855.5	16874.7	15708.8	16577.7	22396.2	17975.6	22054.1	15985.1	7289.08	9435.1	9726.74	9188.47	9991.02	10898.2	11812.3	12239.6	14890	16586	13883.9	16099.9	20179.1	5728.8	5216.27	5294.15	7054.28	6399.29	3027.94	1845.38	2251.02	4472.41	2808.4	4085.7
CNAG_00834	218.67	72	429	67.99		362.431	386.817	483.478	56.2834	54.5435	41.7121	45.7615	48.6861	87.1677	15.5705	25.1033	15.0517	89.0784	157.096	151.739	17.4743	2.01695	4.19774	562.277	660.586	1157.03	232.99	225.888	252.861	15.0784	1	1	1	2.27846	1	175.938	100.381	141.016	52.4126	19.4013	35.7012
CNAG_00866	1913	822	3518	57.11		7848.43	8138.82	9788.48	2628.28	2486.54	2436.71	2038.76	2415.69	3098.17	1406.57	1511.1	1249.05	3040.08	4126.1	4287.74	1454.47	1689.02	1728.2	7988.28	8237.59	12940	3940.99	3558.89	3962.86	1175.08	1127.8	1005.27	826.147	1142.28	1179.29	2471.94	1474.38	1762.02	1162.41	721.401	1202.7
CNAG_00883	1027.83	671	1320	26.04	ECM2201	7815.43	8014.82	9911.48	9190.28	9012.54	8621.71	6848.76	7238.69	10108.2	8394.57	9037.1	7646.05	4217.08	5020.1	5609.74	4846.47	5365.02	6081.2	5012.28	4404.59	5145.03	6039.99	5083.89	5806.86	2711.08	3456.8	3399.27	2519.15	3748.28	3679.29	1248.94	846.381	1043.02	2587.41	1770.4	2459.7
CNAG_00897	7486.33	5894	9104	18.24	SKN1	16585.4	16429.8	19849.5	17425.3	17344.5	15437.7	9202.76	9715.69	13176.2	11237.6	12910.1	10014.1	8658.08	11604.1	12216.7	9474.47	10031	11895.2	21751.3	19490.6	25086	26257	20078.9	25078.9	7785.08	9750.8	9050.27	8776.15	12734.3	11649.3	7034.94	4488.38	5292.02	8856.41	5591.4	6674.7
CNAG_01075	27.17	23	35	17.17		1	23.8167	20.4778	58.2834	44.5435	41.7121	1	1	16.1677	35.5705	57.1033	36.0517	1	1	1	10.4743	4.01695	1	26.2768	30.5864	38.0261	79.9897	42.8881	59.861	1	1	1	1	1	1	1	1	1	1	1	1
CNAG_01242	609.17	382	915	32.76	HAPX	1231.43	1191.82	1438.48	2840.28	2671.54	2559.71	1334.76	1382.69	1837.17	2547.57	2989.1	2654.05	760.078	839.096	839.739	1584.47	1801.02	2084.2	1196.28	1146.59	1378.03	2208.99	1868.89	2136.86	279.078	403.796	395.273	476.147	779.278	713.286	542.938	337.381	419.016	613.413	413.401	531.701
CNAG_01243	278.5	204	369	20.17	SET101	1089.43	1099.82	1340.48	1747.28	1752.54	1548.71	861.762	921.686	1296.17	1177.57	1285.1	1109.05	481.078	569.096	717.739	829.474	903.017	1074.2	1103.28	972.586	1045.03	1217.99	1037.89	1296.86	408.078	517.796	441.273	471.147	769.278	670.286	340.938	210.381	256.016	400.413	294.401	354.701
CNAG_01341	1406.17	818	2151	42.43	ISP3	992.431	1102.82	1298.48	759.283	743.544	734.712	188.762	210.686	272.168	218.57	232.103	161.052	329.078	407.096	483.739	357.474	394.017	411.198	1952.28	2055.59	3646.03	664.99	575.888	686.861	302.078	150.796	128.273	106.147	154.278	163.286	1033.94	624.381	753.016	550.413	356.401	603.701
CNAG_01463	452.67	309	672	29.27		775.431	843.817	858.478	1172.28	1069.54	1017.71	978.762	932.686	1239.17	1233.57	1327.1	1077.05	438.078	450.096	579.739	655.474	698.017	846.198	916.277	734.586	792.026	1174.99	978.888	1159.86	803.078	510.796	472.273	365.147	626.278	541.286	177.938	137.381	129.016	292.413	253.401	293.701
CNAG_01464	163	76	297	52.6	FHB1	367.431	343.817	438.478	177.283	170.544	163.712	234.762	281.686	342.168	158.57	186.103	145.052	139.078	153.096	178.739	85.4743	100.017	98.1977	1054.28	1026.59	2441.03	403.99	332.888	364.861	76.0784	88.7956	82.2726	52.1466	97.2785	77.2857	1108.94	690.381	792.016	248.413	182.401	322.701
CNAG_01469	199.67	161	242	14.18		998.431	1027.82	1206.48	1138.28	1174.54	1114.71	435.762	510.686	694.168	725.57	654.103	550.052	522.078	555.096	562.739	592.474	587.017	773.198	1161.28	926.586	1166.03	1166.99	1031.89	1210.86	268.078	611.796	531.273	512.147	818.278	702.286	228.938	131.381	191.016	271.413	187.401	281.701
CNAG_01477	630.17	507	804	21.22		2377.43	2362.82	2711.48	3811.28	3508.54	3292.71	2053.76	2123.69	3092.17	2809.57	3094.1	2430.05	1034.08	1171.1	1309.74	1738.47	1885.02	2272.2	2811.28	2549.59	3513.03	3689.99	3009.89	3684.86	1072.08	1422.8	1438.27	1547.15	2233.28	2076.29	764.938	434.381	593.016	894.413	582.401	855.701
CNAG_01487	55	41	77	24.64		94.4315	130.817	153.478	78.2834	81.5435	87.7121	16.7615	28.6861	76.1677	47.5705	50.1033	41.0517	40.0784	27.0961	37.7391	42.4743	40.0169	28.1977	45.2768	70.5864	43.0261	71.9897	94.8881	119.861	21.0784	23.7956	45.2726	29.1466	59.2785	40.2857	34.9384	25.3806	1	20.4126	31.4013	29.7012
CNAG_01542	1594.67	1033	2801	40.1		1036.43	1252.82	1490.48	6224.28	6190.54	6596.71	2013.76	2279.69	2726.17	5142.57	6299.1	4969.05	484.078	571.096	646.739	3020.47	3134.02	3670.2	1694.28	1926.59	2365.03	2533.99	2226.89	2503.86	1344.08	1678.8	1660.27	2223.15	3141.28	2627.29	1477.94	963.381	1043.02	2720.41	1720.4	2613.7
CNAG_01737	2355.67	1465	4013	39.2	ERG25	5802.43	5853.82	6920.48	8096.28	7441.54	6862.71	4712.76	5326.69	7516.17	6280.57	7468.1	6349.05	2311.08	2741.1	3547.74	3499.47	3469.02	4416.2	10139.3	8621.59	11896	8312.99	7250.89	9021.86	2162.08	3684.8	3373.27	3925.15	6624.28	5689.29	3086.94	2267.38	2841.02	3029.41	2109.4	2839.7
CNAG_01810	304.83	89	524	69.4		4.43148	24.8167	10.4778	39.2834	8.54352	36.7121	4.76154	7.68614	31.1677	11.5705	11.1033	19.0517	1	1	5.73913	11.4743	5.01695	1	177.277	215.586	273.026	106.99	88.8881	93.861	96.0784	21.7956	38.2726	35.1466	56.2785	56.2857	209.938	135.381	120.016	143.413	94.4013	133.701
CNAG_01882	153.33	100	223	27.99		383.431	431.817	533.478	1251.28	1235.54	1248.71	515.762	521.686	718.168	871.57	1089.1	889.052	193.078	224.096	258.739	571.474	646.017	745.198	492.277	582.586	529.026	817.99	735.888	792.861	211.078	228.796	263.273	280.147	444.278	383.286	98.9384	55.3806	54.0159	212.413	117.401	163.701
CNAG_01945	87.67	70	115	19.35		45.4315	76.8167	78.4778	46.2834	58.5435	27.7121	20.7615	20.6861	52.1677	18.5705	7.1033	14.0517	28.0784	19.0961	6.73913	10.4743	14.0169	7.19774	75.2768	138.586	134.026	137.99	112.888	117.861	14.0784	10.7956	22.2726	1	1	1	3.93843	1	1	14.4126	1	18.7012
CNAG_02045	75.5	31	107	39.29		41.4315	102.817	119.478	511.283	478.544	401.712	97.7615	62.6861	112.168	413.57	550.103	426.052	1	1	1	175.474	189.017	213.198	157.277	203.586	182.026	489.99	459.888	620.861	141.078	119.796	109.273	126.147	198.278	206.286	1	1	1	5.41259	1.40134	1
CNAG_02060	247.33	136	382	37.82		3.43148	4.81667	1	53.2834	40.5435	32.7121	32.7615	29.6861	44.1677	125.57	170.103	137.052	1	1	1	1.47427	3.01695	1	129.277	139.586	154.026	212.99	169.888	222.861	151.078	313.796	345.273	1143.15	1645.28	1656.29	180.938	85.3806	125.016	452.413	337.401	404.701
CNAG_02095	524	352	724	27.37		513.431	491.817	526.478	434.283	465.544	410.712	253.762	289.686	394.168	360.57	408.103	297.052	224.078	255.096	231.739	248.474	280.017	290.198	1289.28	1215.59	1607.03	1111.99	975.888	1228.86	588.078	786.796	798.273	751.147	1107.28	1157.29	424.938	289.381	351.016	449.413	296.401	450.701
CNAG_02288	71.17	58	91	19.6		295.431	431.817	596.478	810.283	801.544	732.712	383.762	390.686	549.168	637.57	753.103	650.052	155.078	114.096	148.739	363.474	397.017	471.198	399.277	363.586	389.026	847.99	796.888	991.861	204.078	342.796	350.273	251.147	444.278	356.286	13.9384	1	3.01588	3.41259	9.40134	5.70116
CNAG_02455	568.83	241	1000	51.45		1577.43	1761.82	2083.48	2723.28	2473.54	2857.71	462.762	506.686	657.168	668.57	681.103	563.052	889.078	1122.1	1269.74	1381.47	1412.02	1736.2	1365.28	1333.59	1588.03	1952.99	1696.89	1862.86	685.078	1106.8	1162.27	975.147	1568.28	1394.29	1833.94	1357.38	1531.02	1803.41	1348.4	2142.7
CNAG_02487	141.33	115	199	23	PHS1	484.431	599.817	697.478	770.283	774.544	665.712	540.762	574.686	820.168	785.57	814.103	579.052	305.078	289.096	429.739	400.474	400.017	440.198	606.277	553.586	668.026	723.99	628.888	783.861	124.078	290.796	260.273	275.147	419.278	399.286	170.938	80.3806	119.016	148.413	90.4013	149.701
CNAG_02491	130.17	94	163	17.3		128.431	117.817	148.478	152.283	108.544	130.712	134.762	122.686	209.168	172.57	202.103	140.052	52.0784	47.0961	94.7391	71.4743	67.0169	76.1977	230.277	172.586	249.026	163.99	156.888	159.861	190.078	71.7956	64.2726	65.1466	105.278	113.286	44.9384	5.38064	19.0159	37.4126	16.4013	35.7012
CNAG_02532	477.5	229	801	47.28		3328.43	3272.82	3766.48	4747.28	4366.54	4104.71	2629.76	2819.69	3582.17	3496.57	3706.1	3015.05	1827.08	2182.1	2182.74	2482.47	2567.02	2999.2	1924.28	1523.59	1612.03	3987.99	3698.89	4283.86	1821.08	1510.8	1554.27	1669.15	2509.28	2300.29	221.938	87.3806	124.016	545.413	346.401	452.701
CNAG_02553	94.17	76	123	23.05		145.431	174.817	205.478	597.283	537.544	516.712	1	1	14.1677	43.5705	39.1033	61.0517	52.0784	78.0961	69.7391	224.474	252.017	268.198	176.277	210.586	243.026	401.99	278.888	396.861	161.078	76.7956	47.2726	118.147	118.278	107.286	39.9384	14.3806	17.0159	75.4126	58.4013	84.7012
CNAG_02722	1138.5	668	1665	34.49		2613.43	2671.82	3241.48	1160.28	1196.54	1075.71	1195.76	1232.69	1979.17	957.57	1172.1	927.052	1002.08	1416.1	1483.74	616.474	670.017	684.198	3975.28	3889.59	5169.03	2926.99	2423.89	2776.86	732.078	641.796	618.273	582.147	901.278	773.286	1005.94	704.381	866.016	596.413	352.401	631.701
CNAG_02751	2179.67	587	4144	77.01		2438.43	2399.82	2932.48	222.283	227.544	231.712	165.762	142.686	215.168	55.5705	87.1033	56.0517	835.078	1475.1	1580.74	138.474	142.017	139.198	3720.28	4017.59	8483.03	488.99	444.888	421.861	110.078	64.7956	59.2726	23.1466	47.2785	35.2857	2317.94	1233.38	1656.02	667.413	334.401	569.701
CNAG_02781	74.17	61	103	20.33		20.4315	44.8167	25.4778	2.28337	11.5435	2.71207	1	1	1	10.5705	37.1033	10.0517	13.0784	2.09605	1	1	2.01695	1	22.2768	38.5864	33.0261	64.9897	46.8881	51.861	16.0784	1	1	1	1	1	1	1	1	44.4126	18.4013	21.7012
CNAG_02849	60.67	45	76	22.71		1	1	1	6.28337	13.5435	1	1	1	2.16768	5.57046	1	1	1	3.09605	1	1	4.01695	1	33.2768	9.58638	18.0261	17.9897	22.8881	4.86098	17.0784	1	1	1	12.2785	16.2857	6.93843	1	1	1	1	1
CNAG_02991	8417.5	6381	9704	14.34		11385.4	11428.8	13533.5	8984.28	8722.54	8673.71	8356.76	8322.69	11606.2	8408.57	9692.1	7509.05	5632.08	7214.1	7481.74	5149.47	5628.02	5846.2	13999.3	12901.6	17357	12832	10680.9	12265.9	8305.08	5334.8	4694.27	4150.15	5837.28	5436.29	3653.94	2390.38	2907.02	4049.41	2536.4	4065.7
CNAG_03050	135.83	91	168	25.41		192.431	192.817	204.478	424.283	356.544	357.712	186.762	146.686	268.168	341.57	371.103	297.052	54.0784	63.0961	66.7391	148.474	177.017	217.198	230.277	210.586	225.026	392.99	359.888	438.861	90.0784	97.7956	67.2726	98.1466	130.278	133.286	40.9384	16.3806	25.0159	77.4126	48.4013	72.7012
CNAG_03080	804.5	560	1372	38.52		1285.43	1213.82	1455.48	1320.28	1317.54	1287.71	674.762	630.686	866.168	1003.57	943.103	860.052	696.078	811.096	795.739	715.474	742.017	829.198	2010.28	1842.59	2706.03	1918.99	1685.89	1960.86	669.078	1189.8	1068.27	1278.15	1967.28	1919.29	882.938	550.381	603.016	767.413	533.401	799.701
CNAG_03129	465.5	352	713	28		573.431	600.817	646.478	1158.28	1060.54	1074.71	705.762	697.686	936.168	874.57	951.103	778.052	274.078	308.096	343.739	542.474	585.017	688.198	970.277	890.586	1129.03	1187.99	986.888	1061.86	540.078	435.796	452.273	425.147	603.278	554.286	410.938	285.381	319.016	438.413	303.401	459.701
CNAG_03159	359.17	219	462	25.23		178.431	212.817	231.478	243.283	273.544	242.712	151.762	171.686	320.168	205.57	288.103	194.052	84.0784	115.096	114.739	117.474	131.017	170.198	347.277	399.586	501.026	435.99	310.888	340.861	414.078	136.796	138.273	171.147	196.278	189.286	152.938	97.3806	85.0159	155.413	87.4013	124.701
CNAG_03227	1069	619	1577	37.25		3426.43	3846.82	4499.48	8863.28	8539.54	8779.71	3443.76	3444.69	5084.17	8886.57	10407.1	8267.05	2067.08	2532.1	2521.74	4339.47	4355.02	5435.2	2739.28	2505.59	3291.03	4308.99	3726.89	4179.86	993.078	850.796	804.273	1382.15	2010.28	1920.29	1143.94	696.381	858.016	1868.41	1350.4	2006.7
CNAG_03284	344.83	221	489	36.04		370.431	349.817	386.478	869.283	870.544	828.712	429.762	481.686	776.168	824.57	912.103	773.052	209.078	225.096	262.739	443.474	474.017	541.198	720.277	661.586	902.026	724.99	624.888	733.861	471.078	346.796	375.273	401.147	536.278	506.286	305.938	215.381	219.016	294.413	194.401	282.701
CNAG_03302	164.17	79	301	55.86		56.4315	52.8167	49.4778	130.283	145.544	112.712	9.76154	29.6861	43.1677	53.5705	61.1033	46.0517	23.0784	29.0961	49.7391	84.4743	65.0169	60.1977	375.277	257.586	435.026	157.99	130.888	186.861	66.0784	71.7956	91.2726	77.1466	114.278	108.286	179.938	86.3806	83.0159	125.413	74.4013	123.701
CNAG_03346	230.17	96	423	61.64	BZP4	191.431	243.817	275.478	211.283	221.544	212.712	108.762	68.6861	85.1677	38.5705	47.1033	31.0517	87.0784	61.0961	51.7391	86.4743	115.017	109.198	2084.28	1660.59	2442.03	452.99	397.888	472.861	59.0784	18.7956	34.2726	1	1	3.28573	303.938	214.381	260.016	125.413	95.4013	172.701
CNAG_03358	1557.5	969	2430	33.67		5799.43	5862.82	6545.48	4796.28	4644.54	4501.71	4278.76	4191.69	5372.17	4384.57	4759.1	3698.05	3049.08	3682.1	3905.74	2714.47	2895.02	3251.2	5425.28	4683.59	6151.03	5280.99	4568.89	5338.86	1390.08	2220.8	2187.27	1651.15	2376.28	2106.29	2447.94	1550.38	1810.02	2117.41	1477.4	2121.7
CNAG_03369	118.17	76	148	26.17	SWE102	128.431	158.817	137.478	78.2834	70.5435	52.7121	49.7615	68.6861	77.1677	77.5705	90.1033	61.0517	33.0784	36.0961	24.7391	20.4743	22.0169	11.1977	623.277	445.586	698.026	304.99	303.888	337.861	51.0784	176.796	190.273	179.147	293.278	316.286	99.9384	55.3806	69.0159	83.4126	62.4013	74.7012
CNAG_03385	4438.83	2205	8036	51.3	PCL103	2864.43	2603.82	2880.48	402.283	404.544	376.712	309.762	266.686	399.168	130.57	138.103	144.052	798.078	1035.1	1115.74	170.474	194.017	223.198	8516.28	6602.59	10069	3784.99	3207.89	3875.86	2420.08	3207.8	2759.27	2186.15	3613.28	3162.29	5952.94	4117.38	5036.02	3420.41	2050.4	3460.7
CNAG_03474	64.5	29	122	61.24		1.43148	3.81667	1	11.2834	2.54352	1	1	1	1	1	5.1033	5.05172	1	1	1	1	1	1	18.2768	35.5864	42.0261	30.9897	29.8881	10.861	1	1	1	1	1	1	39.9384	6.38064	18.0159	10.4126	12.4013	9.70116
CNAG_03495	54.83	25	100	49.84		197.431	201.817	252.478	7.28337	1	1	1	1	15.1677	1	1	1	49.0784	55.0961	99.7391	1	1	1	513.277	401.586	804.026	45.9897	23.8881	50.861	1	1	1	1	1	1	51.9384	18.3806	8.01588	1	1	1
CNAG_03526	107.17	84	145	22.67		111.431	141.817	147.478	120.283	84.5435	106.712	44.7615	49.6861	98.1677	80.5705	89.1033	52.0517	30.0784	58.0961	65.7391	35.4743	28.0169	33.1977	104.277	106.586	138.026	204.99	165.888	192.861	107.078	76.7956	78.2726	64.1466	127.278	112.286	48.9384	32.3806	46.0159	27.4126	23.4013	43.7012
CNAG_03567	671.33	510	880	20.42	CBK1	1988.43	1994.82	2246.48	1684.28	1745.54	1712.71	1414.76	1328.69	2015.17	1605.57	1787.1	1486.05	898.078	1177.1	1170.74	921.474	1014.02	1186.2	1903.28	2039.59	2418.03	2536.99	2151.89	2504.86	802.078	1014.8	892.273	871.147	1248.28	1092.29	672.938	473.381	541.016	714.413	425.401	649.701
CNAG_03819	776.5	666	857	8.14	ERG6	1430.43	1565.82	1653.48	1333.28	1324.54	1286.71	1124.76	1251.69	1972.17	1305.57	1523.1	1207.05	671.078	852.096	835.739	694.474	775.017	829.198	2254.28	2216.59	2648.03	1983.99	1681.89	2006.86	884.078	805.796	715.273	572.147	926.278	894.286	526.938	325.381	482.016	636.413	476.401	697.701
CNAG_03910	304	256	378	15.37	ITR6	278.431	331.817	380.478	135.283	142.544	133.712	62.7615	77.6861	93.1677	34.5705	39.1033	30.0517	156.078	209.096	190.739	78.4743	119.017	101.198	887.277	888.586	1623.03	360.99	385.888	412.861	87.0784	82.7956	71.2726	6.14661	21.2785	1.28573	228.938	172.381	204.016	248.413	119.401	171.701
CNAG_04096	112.33	89	153	22.88		471.431	507.817	613.478	704.283	634.544	642.712	797.762	806.686	1141.17	767.57	815.103	674.052	178.078	172.096	163.739	261.474	305.017	311.198	338.277	364.586	327.026	1047.99	1011.89	1235.86	264.078	415.796	370.273	303.147	489.278	420.286	53.9384	31.3806	35.0159	108.413	64.4013	87.7012
CNAG_04098	869.67	245	1600	70.38	PDR5-2	373.431	389.817	432.478	377.283	367.544	385.712	138.762	129.686	210.168	173.57	211.103	163.052	105.078	117.096	157.739	134.474	111.017	212.198	1436.28	1337.59	3026.03	506.99	442.888	553.861	166.078	175.796	173.273	141.147	261.278	259.286	1172.94	795.381	972.016	539.413	388.401	622.701
CNAG_04213	679.5	509	947	24.03		4271.43	4157.82	4875.48	5611.28	5438.54	5157.71	3893.76	3937.69	5084.17	5208.57	5468.1	4942.05	1968.08	2551.1	2556.74	2816.47	3100.02	3582.2	3196.28	3134.59	3653.03	5063.99	4464.89	4979.86	1171.08	2758.8	2632.27	2707.15	4036.28	4086.29	745.938	509.381	584.016	1352.41	878.401	1236.7
CNAG_04216	32.5	21	41	23.41		1	9.81667	1	37.2834	36.5435	29.7121	1	1	1	14.5705	30.1033	3.05172	1	1	1	7.47427	1	1	3.27679	24.5864	29.0261	58.9897	57.8881	81.861	1.07837	1	1	8.14661	31.2785	18.2857	1	1	1	1	1	1
CNAG_04243	277.17	185	370	24.17	CDC24	348.431	410.817	438.478	309.283	310.544	295.712	122.762	159.686	235.168	123.57	92.1033	109.052	141.078	154.096	223.739	156.474	130.017	180.198	745.277	707.586	794.026	737.99	713.888	741.861	212.078	370.796	364.273	534.147	764.278	745.286	474.938	335.381	356.016	387.413	325.401	471.701
CNAG_04256	397.33	344	492	14.65	LPI6	976.431	1087.82	1234.48	1552.28	1533.54	1518.71	842.762	858.686	1286.17	1294.57	1475.1	1129.05	438.078	586.096	590.739	776.474	836.017	994.198	836.277	872.586	980.026	1425.99	1232.89	1412.86	411.078	424.796	406.273	411.147	596.278	551.286	358.938	228.381	278.016	309.413	215.401	322.701
CNAG_04283	1507.33	975	2202	29.16		6068.43	5837.82	7327.48	6026.28	5573.54	5244.71	5214.76	5721.69	8794.17	6969.57	7425.1	6291.05	3023.08	4072.1	4691.74	3154.47	3292.02	3919.2	6488.28	4979.59	6966.03	5194.99	4227.89	5165.86	1838.08	2166.8	1991.27	1592.15	2513.28	2363.29	1736.94	1165.38	1360.02	2566.41	1625.4	2349.7
CNAG_04346	70.33	60	75	7.82		439.431	516.817	536.478	327.283	311.544	245.712	1018.76	1060.69	1441.17	707.57	726.103	583.052	212.078	306.096	272.739	138.474	154.017	159.198	161.277	165.586	157.026	389.99	321.888	433.861	113.078	155.796	145.273	106.147	155.278	120.286	1	1	8.01588	10.4126	16.4013	28.7012
CNAG_04355	143.67	56	290	66.77		13.4315	28.8167	16.4778	11.2834	32.5435	37.7121	1	7.68614	43.1677	4.57046	19.1033	13.0517	2.07838	1	11.7391	7.47427	2.01695	1	120.277	125.586	154.026	123.99	63.8881	98.861	49.0784	47.7956	56.2726	69.1466	79.2785	76.2857	113.938	51.3806	47.0159	85.4126	43.4013	36.7012
CNAG_04417	564.5	348	912	39.27		324.431	286.817	370.478	537.283	535.544	511.712	16.7615	1.68614	32.1677	59.5705	81.1033	37.0517	161.078	191.096	225.739	286.474	313.017	339.198	530.277	462.586	786.026	919.99	803.888	927.861	187.078	176.796	205.273	253.147	317.278	348.286	539.938	375.381	482.016	673.413	457.401	649.701
CNAG_04453	94.17	62	133	27.84	IPC1	976.431	1050.82	1275.48	1601.28	1522.54	1408.71	894.762	1037.69	1569.17	1135.57	1290.1	1119.05	392.078	445.096	593.739	686.474	802.017	944.198	578.277	639.586	741.026	971.99	840.888	1013.86	159.078	314.796	313.273	314.147	478.278	482.286	78.9384	57.3806	84.0159	157.413	115.401	211.701
CNAG_04496	389.83	316	475	16.16		1833.43	1893.82	2077.48	3290.28	3029.54	2964.71	1465.76	1610.69	2415.17	1378.57	1507.1	1279.05	826.078	991.096	1217.74	1606.47	1818.02	2056.2	1818.28	1602.59	1987.03	2023.99	1912.89	2159.86	889.078	1093.8	1052.27	998.147	1596.28	1481.29	742.938	482.381	608.016	900.413	682.401	895.701
CNAG_04655	284.5	173	460	36.93		4999.43	5122.82	6334.48	7974.28	7849.54	7556.71	4354.76	4718.69	7397.17	6593.57	7261.1	6207.05	2644.08	3433.1	3888.74	4481.47	4673.02	5433.2	2376.28	2484.59	2665.03	4287.99	3529.89	4102.86	604.078	822.796	779.273	895.147	1309.28	1307.29	211.938	139.381	168.016	773.413	473.401	615.701
CNAG_04804	1119.5	855	1733	28.59	SRE1	4769.43	4982.82	5991.48	8118.28	8141.54	7739.71	4633.76	4349.69	5471.17	5870.57	6810.1	5778.05	2542.08	3310.1	2991.74	4548.47	4668.02	5309.2	4998.28	5178.59	5989.03	7224.99	6423.89	7437.86	1374.08	2391.8	2209.27	2209.15	3231.28	3083.29	1019.94	705.381	877.016	1962.41	1168.4	1770.7
CNAG_04899	439.5	228	669	43.85		466.431	441.817	501.478	428.283	465.544	424.712	266.762	288.686	476.168	360.57	483.103	336.052	230.078	271.096	300.739	243.474	248.017	265.198	798.277	769.586	1086.03	782.99	668.888	694.861	393.078	337.796	315.273	390.147	481.278	487.286	449.938	274.381	320.016	373.413	246.401	375.701
CNAG_04951	499	421	629	15.6		1980.43	1898.82	2137.48	3621.28	3533.54	3105.71	2182.76	2154.69	2939.17	2664.57	2981.1	2612.05	955.078	1239.1	1388.74	1840.47	2025.02	2249.2	2884.28	2393.59	3190.03	2726.99	2496.89	2886.86	1060.08	1833.8	1659.27	1398.15	2024.28	1896.29	1055.94	667.381	780.016	1366.41	1059.4	1400.7
CNAG_05077	312.17	105	614	69.15	LPI11	534.431	509.817	563.478	186.283	178.544	216.712	119.762	128.686	182.168	194.57	213.103	188.052	191.078	288.096	222.739	115.474	127.017	123.198	841.277	950.586	1240.03	771.99	667.888	680.861	115.078	124.796	140.273	179.147	242.278	213.286	436.938	263.381	339.016	126.413	66.4013	130.701
CNAG_05159	4739.33	2628	8130	45.25		5713.43	6114.82	7222.48	7991.28	7877.54	7658.71	3874.76	3915.69	4676.17	5381.57	6161.1	4728.05	3120.08	3887.1	4159.74	4359.47	4401.02	5205.2	4998.28	3916.59	4615.03	5849.99	4784.89	5658.86	5531.08	2097.8	1808.27	1679.15	2437.28	2075.29	1117.94	696.381	858.016	2525.41	1602.4	2301.7
CNAG_05303	23.33	20	27	15.73	ICL1	104.431	161.817	264.478	275.283	281.544	299.712	192.762	216.686	333.168	453.57	546.103	454.052	19.0784	1	13.7391	129.474	117.017	182.198	183.277	170.586	149.026	296.99	283.888	389.861	35.0784	137.796	144.273	119.147	133.278	166.286	1	1	1	1	1	1
CNAG_05333	18	12	33	43.18		249.431	290.817	315.478	222.283	218.544	183.712	1	1	1	1	1	1	124.078	161.096	170.739	122.474	157.017	165.198	293.277	274.586	303.026	547.99	450.888	508.861	235.078	291.796	300.273	274.147	367.278	375.286	1	1	1	1	1	1
CNAG_05387	206.17	143	308	29.6		93.4315	128.817	120.478	292.283	250.544	214.712	73.7615	88.6861	116.168	153.57	148.103	113.052	33.0784	30.0961	32.7391	119.474	99.0169	128.198	1096.28	892.586	1531.03	283.99	274.888	342.861	36.0784	35.7956	37.2726	44.1466	50.2785	39.2857	134.938	85.3806	143.016	79.4126	28.4013	89.7012
CNAG_05451	337.67	305	383	9.33		926.431	965.817	1181.48	1221.28	1089.54	1136.71	513.762	606.686	778.168	848.57	899.103	762.052	438.078	543.096	579.739	633.474	617.017	741.198	849.277	805.586	969.026	1018.99	905.888	1102.86	517.078	480.796	454.273	468.147	689.278	595.286	298.938	170.381	208.016	292.413	226.401	327.701
CNAG_05551	111	86	160	23.41		167.431	155.817	170.478	118.283	135.544	128.712	106.762	113.686	179.168	139.57	129.103	109.052	75.0784	57.0961	84.7391	63.4743	46.0169	38.1977	291.277	213.586	310.026	296.99	241.888	297.861	158.078	92.7956	87.2726	90.1466	151.278	128.286	46.9384	21.3806	33.0159	37.4126	31.4013	60.7012
CNAG_05558	325	245	406	18.23	KIN4	1023.43	1018.82	1149.48	1455.28	1469.54	1352.71	916.762	1012.69	1144.17	1092.57	1239.1	1064.05	480.078	574.096	723.739	817.474	797.017	985.198	1203.28	1050.59	1231.03	1261.99	1153.89	1277.86	344.078	526.796	513.273	527.147	826.278	711.286	442.938	282.381	321.016	453.413	302.401	437.701
CNAG_05571	468.83	217	860	54.04		1553.43	1399.82	1971.48	2037.28	1880.54	1925.71	960.762	1104.69	1632.17	1024.57	1113.1	918.052	829.078	956.096	1309.74	1207.47	1114.02	1411.2	2288.28	2008.59	2456.03	2167.99	1905.89	2071.86	599.078	1146.8	1084.27	1041.15	1558.28	1522.29	1041.94	634.381	824.016	901.413	700.401	1014.7
CNAG_05678	853.5	421	1675	58.93		508.431	590.817	829.478	1060.28	1009.54	1012.71	705.762	747.686	1185.17	1429.57	1780.1	1387.05	228.078	294.096	365.739	530.474	492.017	556.198	2114.28	1817.59	2864.03	1818.99	1721.89	2040.86	659.078	646.796	701.273	762.147	1028.28	1045.29	1030.94	676.381	791.016	667.413	495.401	727.701
CNAG_05692	225.17	189	282	14.51	LCB3	578.431	623.817	706.478	694.283	663.544	626.712	542.762	540.686	876.168	791.57	834.103	651.052	289.078	309.096	302.739	345.474	322.017	398.198	805.277	623.586	898.026	766.99	705.888	813.861	222.078	321.796	294.273	289.147	430.278	465.286	234.938	179.381	192.016	224.413	191.401	265.701
CNAG_05755	783.17	367	1306	53.71		425.431	351.817	379.478	1279.28	1290.54	1306.71	401.762	410.686	653.168	700.57	809.103	640.052	189.078	301.096	358.739	826.474	792.017	975.198	1505.28	1516.59	2159.03	1611.99	1334.89	1461.86	542.078	779.796	764.273	739.147	999.278	994.286	1254.94	834.381	965.016	1122.41	728.401	1076.7
CNAG_05757	632.67	332	987	43.1		254.431	162.817	223.478	905.283	820.544	833.712	241.762	321.686	446.168	363.57	463.103	385.052	112.078	185.096	213.739	464.474	478.017	593.198	582.277	675.586	1019.03	560.99	465.888	571.861	563.078	326.796	373.273	389.147	472.278	508.286	518.938	367.381	369.016	598.413	344.401	490.701
CNAG_05835	1968.17	1415	2432	20.38	LIV3	6804.43	6069.82	6748.48	19552.3	18473.5	17206.7	5690.76	6295.69	9154.17	18331.6	18983.1	16583.1	3191.08	4040.1	5001.74	10546.5	10710	13664.2	11205.3	8030.59	9580.03	14159	12049.9	14405.9	3538.08	5479.8	5204.27	6933.15	10515.3	10001.3	2444.94	1556.38	1795.02	4515.41	3308.4	4564.7
CNAG_05968	301.17	148	432	30.04	CDC420	76.4315	71.8167	54.4778	47.2834	41.5435	42.7121	29.7615	52.6861	68.1677	81.5705	109.103	88.0517	9.07838	11.0961	13.7391	18.4743	14.0169	1	251.277	206.586	315.026	153.99	156.888	128.861	307.078	99.7956	112.273	213.147	285.278	311.286	87.9384	66.3806	47.0159	32.4126	38.4013	60.7012
CNAG_06092	3496.83	2826	4215	15.18	CLN1	3801.43	3835.82	4415.48	4008.28	3953.54	3557.71	3457.76	3719.69	4953.17	4396.57	4663.1	3701.05	1745.08	2152.1	2126.74	2139.47	2350.02	2576.2	7214.28	6871.59	8841.03	7639.99	7152.89	8285.86	3296.08	6825.8	6493.27	7196.15	11695.3	10896.3	5071.94	3571.38	4096.02	4817.41	3673.4	4907.7
CNAG_06125	17499.3	9554	28842	41.26	TEF1	56079.4	54021.8	64756.5	40806.3	38208.5	35523.7	31831.8	34453.7	51211.2	30429.6	32851.1	26396.1	23240.1	29443.1	35850.7	21031.5	21959	26586.2	71136.3	57365.6	78482	48232	40808.9	48450.9	19698.1	26769.8	24746.3	21348.1	31100.3	30753.3	32410.9	23455.4	27031	24976.4	17958.4	24509.7
CNAG_06165	302.67	257	364	14.88		1040.43	1031.82	1223.48	1048.28	1048.54	966.712	674.762	687.686	889.168	783.57	849.103	677.052	496.078	530.096	611.739	547.474	592.017	641.198	971.277	898.586	1218.03	1338.99	1119.89	1310.86	417.078	386.796	344.273	349.147	504.278	495.286	286.938	137.381	189.016	337.413	218.401	313.701
CNAG_06169	431	153	896	67.63		1391.43	1397.82	1752.48	503.283	525.544	530.712	307.762	341.686	385.168	256.57	268.103	189.052	516.078	675.096	773.739	293.474	328.017	323.198	1616.28	1426.59	2718.03	504.99	463.888	524.861	161.078	129.796	108.273	106.147	130.278	123.286	630.938	378.381	442.016	257.413	182.401	280.701
CNAG_06182	119.5	81	161	28.46		304.431	320.817	360.478	161.283	202.544	148.712	176.762	209.686	394.168	217.57	259.103	192.052	106.078	153.096	189.739	96.4743	81.0169	97.1977	343.277	376.586	463.026	444.99	390.888	477.861	133.078	201.796	209.273	173.147	253.278	227.286	138.938	71.3806	86.0159	109.413	68.4013	108.701
CNAG_06252	328.83	156	540	54.7	CCD6	326.431	352.817	449.478	403.283	386.544	404.712	210.762	239.686	470.168	192.57	245.103	188.052	202.078	289.096	324.739	271.474	270.017	311.198	633.277	603.586	820.026	706.99	551.888	541.861	211.078	225.796	232.273	199.147	270.278	299.286	345.938	234.381	219.016	346.413	206.401	335.701
CNAG_06291	120.67	54	214	59.87	FPD1	16.4315	34.8167	38.4778	6.28337	18.5435	1	1	1	1	1.57046	13.1033	2.05172	1	1	1	1	1	1	80.2768	97.5864	201.026	22.9897	26.8881	11.861	1	1	1	1	1	1	120.938	53.3806	91.0159	16.4126	3.40134	20.7012
CNAG_06373	126.17	83	183	32.71		456.431	439.817	566.478	452.283	459.544	420.712	706.762	741.686	1103.17	575.57	601.103	480.052	221.078	268.096	314.739	241.474	240.017	319.198	283.277	363.586	345.026	602.99	539.888	694.861	209.078	163.796	165.273	164.147	230.278	223.286	70.9384	55.3806	41.0159	76.4126	50.4013	42.7012
CNAG_06499	719.17	552	908	20.76	DPP101	3889.43	3954.82	4643.48	5739.28	5601.54	5540.71	3725.76	3871.69	6021.17	6414.57	7922.1	6163.05	2017.08	2495.1	2834.74	2794.47	2889.02	3552.2	3934.28	3712.59	4585.03	4849.99	4067.89	4728.86	680.078	677.796	736.273	912.147	1266.28	1241.29	736.938	478.381	550.016	1074.41	693.401	946.701
CNAG_06529	88	51	114	32.68		3833.43	4247.82	5017.48	1270.28	1184.54	1075.71	3222.76	3643.69	4730.17	1264.57	1413.1	1033.05	1669.08	2059.1	2076.74	658.474	742.017	717.198	1062.28	971.586	824.026	2159.99	1948.89	2329.86	542.078	801.796	756.273	378.147	582.278	510.286	3.93843	1	1	25.4126	11.4013	7.70116
CNAG_06534	221	159	313	24.62	HMG1	1067.43	1130.82	1335.48	1219.28	1186.54	1045.71	562.762	643.686	932.168	647.57	782.103	631.052	499.078	583.096	562.739	488.474	589.017	594.198	2025.28	1556.59	1958.03	1378.99	1248.89	1548.86	173.078	423.796	431.273	365.147	632.278	670.286	288.938	207.381	254.016	475.413	334.401	483.701
CNAG_06583	56	47	65	11.63		408.431	573.817	852.478	424.283	425.544	367.712	849.762	1019.69	1407.17	524.57	626.103	525.052	157.078	128.096	148.739	138.474	165.017	154.198	325.277	278.586	299.026	424.99	411.888	547.861	94.0784	153.796	153.273	91.1466	158.278	135.286	1	1	1	1	1	1
CNAG_06699	12932.5	7570	20862	37.84	GPD1	17771.4	17794.8	19723.5	7377.28	7128.54	7067.71	7720.76	7899.69	10532.2	7237.57	8145.1	6340.05	7523.08	9294.1	10298.7	4342.47	5265.02	5375.2	39575.3	34479.6	52423	19633	16615.9	18975.9	5491.08	4799.8	4438.27	4039.15	5744.28	5705.29	18558.9	12423.4	14504	11724.4	8302.4	12503.7
CNAG_06746	5474.17	4503	6406	14.38	H2B	10463.4	10509.8	11231.5	10356.3	10059.5	9813.71	8184.76	7755.69	10749.2	9575.57	11277.1	8948.05	4750.08	6011.1	6315.74	5093.47	5809.02	6489.2	20400.3	19796.6	25255	17236	13832.9	16806.9	6204.08	5489.8	5080.27	6579.15	8721.28	8919.29	3203.94	2149.38	2539.02	3812.41	2361.4	3228.7
CNAG_06829	429.5	283	636	28.76	ERG1	1599.43	1549.82	1644.48	2233.28	2169.54	1966.71	1227.76	1286.69	1980.17	1939.57	2175.1	1699.05	725.078	786.096	921.739	992.474	1088.02	1307.2	1869.28	1717.59	2152.03	2021.99	1689.89	2066.86	541.078	711.796	687.273	729.147	1110.28	980.286	444.938	288.381	334.016	659.413	466.401	633.701
CNAG_06916	219.67	62	398	74.24		47.4315	41.8167	85.4778	18.2834	22.5435	23.7121	8.76154	11.6861	63.1677	25.5705	31.1033	9.05172	27.0784	43.0961	65.7391	11.4743	1	4.19774	222.277	200.586	299.026	101.99	84.8881	58.861	61.0784	37.7956	52.2726	34.1466	51.2785	46.2857	214.938	130.381	103.016	146.413	107.401	142.701
CNAG_07316	313.5	215	472	29.98		2019.43	2103.82	2550.48	4562.28	4376.54	4149.71	2081.76	2144.69	3101.17	3803.57	4624.1	3718.05	797.078	954.096	1060.74	1926.47	2039.02	2471.2	2300.28	2258.59	2312.03	4305.99	3832.89	4614.86	932.078	1177.8	1179.27	1251.15	1862.28	1703.29	214.938	137.381	138.016	399.413	229.401	328.701
CNAG_07358	618.17	453	828	22.27		797.431	798.817	904.478	827.283	813.544	673.712	2385.76	2482.69	3242.17	3008.57	3411.1	2781.05	1583.08	2035.1	1899.74	1806.47	1856.02	2099.2	1558.28	1529.59	1835.03	2551.99	2189.89	2507.86	1295.08	913.796	871.273	762.147	1110.28	1050.29	312.938	187.381	242.016	638.413	393.401	547.701
CNAG_07730	57.33	45	66	13.54		48.4315	94.8167	68.4778	83.2834	55.5435	57.7121	26.7615	42.6861	39.1677	84.5705	102.103	60.0517	24.0784	20.0961	15.7391	32.4743	29.0169	24.1977	45.2768	59.5864	52.0261	112.99	59.8881	124.861	34.0784	26.7956	34.2726	31.1466	52.2785	49.2857	1	1	1	1	1	1
CNAG_07749	293.17	256	335	11.79		823.431	795.817	879.478	898.283	911.544	896.712	704.762	700.686	1109.17	890.57	1005.1	769.052	407.078	464.096	514.739	478.474	521.017	603.198	845.277	736.586	920.026	1166.99	1049.89	1195.86	454.078	479.796	472.273	464.147	627.278	610.286	214.938	123.381	156.016	281.413	174.401	231.701
CNAG_07799	1048.33	199	2602	87.64		15677.4	17391.8	20519.5	64663.3	62986.5	61851.7	17874.8	18390.7	25844.2	40428.6	46362.1	37903.1	9453.08	10705.1	11726.7	35197.5	35584	44580.2	9868.28	9408.59	8914.03	21970	20311.9	23040.9	3115.08	4128.8	4118.27	6213.15	9571.28	9152.29	871.938	506.381	642.016	7736.41	5275.4	7182.7
CNAG_07873	595.17	333	1001	44.2		899.431	895.817	988.478	1142.28	1069.54	1108.71	804.762	861.686	1345.17	987.57	1141.1	893.052	368.078	456.096	577.739	528.474	540.017	687.198	1311.28	1282.59	1882.03	1140.99	1051.89	1143.86	371.078	538.796	525.273	608.147	953.278	786.286	1031.94	715.381	805.016	706.413	559.401	847.701
CNAG_07902	835.5	436	1365	42.2		3720.43	3587.82	4201.48	1822.28	1860.54	1777.71	1220.76	1221.69	1879.17	1033.57	1153.1	897.052	1690.08	2434.1	2347.74	974.474	1147.02	1168.2	4436.28	4016.59	5039.03	3952.99	3488.89	3945.86	872.078	1044.8	945.273	649.147	965.278	837.286	926.938	540.381	768.016	853.413	487.401	867.701
Total counts						307179	310817	364120	383489	369384	354569	229853	241672	341056	313774	352149	284883	144845	180414	200046	201065	210894	249954	389421	346386	463602	368168	315899	370940	140806	148723	140040	140260	208880	197435	140030	93748.6	110581	140985	96334.3	136526			Highest total count	463602
Normalization factor to highest count						0.662592	0.670439	0.785415	0.827195	0.79677	0.764814	0.495799	0.521291	0.735665	0.676817	0.759593	0.614499	0.312433	0.389158	0.431503	0.433702	0.454903	0.539156	0.839991	0.747161	1	0.794146	0.681401	0.800125	0.303721	0.320798	0.302069	0.302544	0.450558	0.425873	0.302049	0.202218	0.238525	0.304108	0.207795	0.294489
						A1-38-2 Amb 1	A1-38-2 Amb 2	A1-38-2 Amb 3	A1-38-2 CO2 1	A1-38-2 CO2 2	A1-38-2 CO2 3	A2-102-5 Amb 1	A2-102-5 Amb 2	A2-102-5 Amb 3	A2-102-5 CO2 1	A2-102-5 CO2 2	A2-102-5 CO2 3	A1-35-8 Amb 1	A1-35-8 Amb 2	A1-35-8 Amb 3	A1-35-8 CO2 1	A1-35-8 CO2 2	A1-35-8 CO2 3	C23 Amb 1	C23 Amb 2	C23 Amb 3	C23 CO2 1	C23 CO2 2	C23 CO2 3	A1-84-14 Amb 1	A1-84-14 Amb 2	A1-84-14 Amb 3	A1-84-14 CO2 1	A1-84-14 CO2 2	A1-84-14 CO2 3	H99 Amb 1	H99 Amb 2	H99 Amb 3	H99 CO2 1	H99 CO2 2	H99 CO2 3
CNAG_00039	404	255	537	25.93	ZFC6	4597.75	4262.61	4214.94	4640.12	4584.19	4633.43	5035.84	5192.27	5529.92	5531.14	5271.38	5438.66	4289.17	4111.69	5028.33	4453.46	4554.86	4748.53	2905.12	2867.63	2586.03	2868.48	3050.9	3076.84	1857.22	3113.47	3255.13	2552.18	2905.9	2985.13	3075.46	2993.71	2922.19	3654.67	3880.75	3690.12
CNAG_00040	792	609	1088	25.02	ERG11	5444.42	5290.29	5313.72	5500.86	5200.43	4732.8	7212.13	8048.64	7978.04	6463.45	6489.14	6623.37	4554.83	4150.23	4136.1	4296.67	4095.42	4401.69	6495.64	5947.29	5643.03	5822.59	6143.06	6216.35	3305.92	7028.7	7485.95	7566.34	8512.29	8425.73	3625.04	3953.07	3756.49	5193.6	5545.85	5082.37
CNAG_00097	400.67	244	588	30.89	ITR1	2131.67	2199.78	2087.4	2433.87	2341.38	2325.68	3698.6	3582.81	2858.86	3474.46	3415.12	3318.24	2227.93	2294.95	2145.38	2470.53	2534.64	2244.61	1870.59	1628.28	1545.03	2553.67	2666.4	2639.41	2021.85	2424.56	2308.32	2330.73	2393.21	2358.18	754.642	649.699	612.162	1349.56	1397.54	1319.92
CNAG_00183	505	429	676	18.41		3268.12	3176.75	3303.32	2111.09	2066.52	2075.94	2333.13	2364.68	2463.3	1451.75	1375.87	1419.13	3034.5	2880.83	2808.18	2078.56	1938.91	2010.92	2200.35	2241.26	2279.03	2313.16	2384.63	2319.46	2153.55	3026.19	3162.43	2129.1	2322.18	2139.81	1519.42	1574.44	1702.19	1905.29	1835.47	1802.11
CNAG_00269	16.83	11	20	18.18		1	1	1	1	1	1	43.8919	30.0909	55.9598	151.548	117.304	118.88	1	1	1	1	1	1	1	1	1	1	1	1	1	1	1	1	1	1	1	1	1	1	1	1
CNAG_00279	1295.5	1055	1453	11.13		3997.08	4211.89	4217.49	3338.13	3261.35	3170.33	4420.67	4219.69	4316.05	3359.21	3507.28	3503.75	4004.31	3954.94	3559.05	3153.03	3051.24	3110.78	3877.75	3653.27	3614.03	4004.29	4023.9	4096.68	7299.71	4254.37	3956.95	3424.78	3296.53	3539.29	2078.93	2212.37	2238.83	2040.11	1989.46	1893.79
CNAG_00331	716.33	328	1109	43.47		1847.94	1755.29	1644.33	4254.48	4072.12	4003.21	1609.04	1591.6	1775.49	3467.07	3162.36	3336.14	1731.82	1621.7	1440.87	4026.9	3776.67	3832.28	1607.49	1481.05	1199.03	3076.25	3234.35	3125.59	3226.9	4562.98	4542.91	5398.05	5649.17	6011.86	1287.67	1282.68	1140.41	5127.83	5213.79	4810.71
CNAG_00414	88.33	73	110	17.5	MAK32	141.009	153.357	129.203	37.8186	82.2616	78.074	255.671	179.719	227.233	293.389	262.118	255.577	157.085	92.7543	101.365	74.8769	98.9595	17.0595	164.617	197.529	137.026	214.053	256.66	212.293	72.6928	155.224	106.839	129.392	162.639	176.78	125.604	120.566	67.1455	205.232	131.867	199.332
CNAG_00440	154.33	128	181	13.12	SSN801	397.577	494.925	429.681	547.977	500.199	561.852	485.604	513.506	675.807	523.88	542.532	488.287	461.15	311.175	353.97	489.908	505.64	517.842	450.335	434.426	381.026	615.743	560.445	630.977	1123	576.049	563.688	539.25	579.9	489.08	294.451	105.731	117.455	241.403	353.239	304.599
CNAG_00442	215.17	68	409	65.02		2933.07	3151.39	2912.44	6003.77	5477.8	5397.01	10023.8	10087.8	10169.3	12726.6	11369.4	11855.3	3517.81	2618.72	3072.38	5550.99	5860.63	6226.76	2230.12	1976.26	1550.03	3714.67	4169.19	4224.16	3997.34	6458.25	6655.02	7050.71	7866.42	7578.05	628.834	570.576	561.853	2733.94	2884.58	2596.7
CNAG_00444	1037.33	693	1475	25.66		307.024	284.615	205.596	261.466	242.91	267.662	463.417	507.751	539.876	580.025	622.838	558.263	221.098	169.844	143.079	227.055	180.296	167.294	384.858	426.396	386.026	667.37	652.902	728.462	2690.22	828.544	825.218	869.781	795.188	653.448	625.523	550.795	482.196	547.216	512.049	518.529
CNAG_00483	2301.17	1588	3735	33.62	ACT1	11168.9	10883.6	10267.8	7780.86	7657.85	7512.56	9739.36	9669.61	9942.25	8799.38	8457.3	8136.8	10028	9207.31	9753.68	7642.29	7425.8	7374.85	12202.8	12720.9	12429	10479.2	11388.1	11053.1	8863.64	11084.2	11015	10412.2	10860.5	10139.9	11736.3	10999.9	11143.6	9419.07	10281.3	10311.8
CNAG_00519	612.67	343	1060	40.96	ERG3	2499.93	2202.76	2087.4	1521.15	1513.04	1554.25	2129.42	2274.52	2097.65	1609.85	1802.42	1568.84	2304.75	2318.07	2268.21	1608.19	1426.72	1515.7	2409.88	2309.52	2197.03	2320.72	2356.74	2618.17	1577.36	1536.15	1576.7	1788.66	1665.22	1644.35	1602.19	1569.5	1509.34	1852.67	1796.97	1914.17
CNAG_00777	637.83	358	921	33.77		6383.16	6526.8	6455.79	8248.7	8684.5	8829.22	7389.62	7262.13	7547.14	8360.57	7727.96	8195.38	5886.31	5920.72	6645.93	8126.49	7595.07	8819.7	3467.03	3631.86	3195.03	4941.14	4883.89	4907.81	2334.63	3923.95	4228.42	4056.1	4408.49	4377.57	4386.51	4615.72	4888.44	4634.58	4641.11	5041.62
CNAG_00816	11893.2	8843	18199	30.33		20542.7	22294.1	22224.5	20887.8	21154.9	22063.8	31683.8	31801.2	30443.4	26559	29034.1	26013.2	23330.1	24244.9	22541.5	21186.1	21963	20213.4	14062.4	16381.4	14890	20885.3	20375.5	20121.7	66439.4	17857.9	17268.5	17498.8	15656.8	15026.3	10024.7	9125.71	9437.23	14706.7	13515.2	13873.9
CNAG_00834	218.67	72	429	67.99		546.99	576.961	615.57	68.0413	68.4558	54.5388	92.2987	93.3952	118.488	23.0054	33.0484	24.4943	285.112	403.682	351.653	40.291	4.4338	7.78577	669.385	884.128	1157.03	293.384	331.505	316.027	49.6454	1	1	1	5.05697	1	582.484	496.399	591.2	172.349	93.3676	121.231
CNAG_00866	1913	822	3518	57.11		11845	12139.5	12462.8	3177.35	3120.78	3186.02	4112.08	4634.04	4211.38	2078.21	1989.36	2032.63	9730.34	10602.6	9936.76	3353.63	3712.92	3205.37	9509.96	11025.2	12940	4962.55	5222.9	4952.8	3868.94	3515.59	3327.96	2730.67	2535.25	2769.1	8183.91	7291.05	7387.13	3822.37	3471.69	4084.03
CNAG_00883	1027.83	671	1320	26.04	ECM2201	11795.2	11954.6	12619.4	11110.2	11311.4	11272.9	13813.6	13886.1	13740.2	12403	11897.3	12442.7	13497.5	12899.9	13000.5	11174.7	11793.8	11279.1	5967.06	5895.09	5145.03	7605.64	7460.93	7257.44	8926.2	10775.6	11253.3	8326.56	8319.19	8639.4	4134.89	4185.49	4372.77	8508.21	8519.93	8352.44
CNAG_00897	7486.33	5894	9104	18.24	SKN1	25031.1	24506.1	25272.6	21065.5	21768.6	20184.9	18561.5	18637.7	17910.5	16603.6	16996.1	16296.3	27711.8	29818.5	28312.1	21845.6	22050.9	22062.6	25894.7	26086.2	25086	33063.2	29467.1	31343.7	25632.3	30395.4	29961	29007.9	28263.3	27353.9	23290.8	22195.8	22186.4	29122.6	26908.2	22665.4
CNAG_01075	27.17	23	35	17.17		1	35.524	26.0726	70.4591	55.9051	54.5388	1	1	21.977	52.5555	75.1762	58.6685	1	1	1	24.1508	8.83034	1	31.2822	40.9368	38.0261	100.724	62.941	74.8145	1	1	1	1	1	1	1	1	1	1	1	1
CNAG_01242	609.17	382	915	32.76	HAPX	1858.51	1777.67	1831.49	3433.63	3352.97	3346.84	2692.14	2652.42	2497.29	3764.05	3935.14	4319.05	2432.77	2156.18	1946.08	3653.37	3959.12	3865.67	1424.15	1534.59	1378.03	2781.59	2742.71	2670.66	918.863	1258.72	1308.55	1573.81	1729.59	1674.88	1797.52	1668.4	1756.7	2017.09	1989.46	1805.5
CNAG_01243	278.5	204	369	20.17	SET101	1644.2	1640.44	1706.71	2112.3	2199.56	2024.95	1738.13	1768.08	1761.9	1739.87	1691.83	1804.81	1539.78	1462.38	1663.35	1912.54	1985.08	1992.37	1313.44	1301.71	1045.03	1533.71	1523.17	1620.82	1343.59	1614.08	1460.83	1557.29	1707.39	1573.91	1128.75	1040.37	1073.33	1316.68	1416.79	1204.46
CNAG_01341	1406.17	818	2151	42.43	ISP3	1497.8	1644.92	1653.24	917.902	933.198	960.641	380.722	404.162	369.961	322.939	305.563	262.086	1053.28	1046.09	1121.06	824.239	866.156	762.669	2324.16	2751.19	3646.03	837.364	845.153	858.442	994.59	470.064	424.647	350.847	342.416	383.414	3423.09	3087.66	3156.97	1809.93	1715.16	2050
CNAG_01463	452.67	309	672	29.27		1170.3	1258.6	1093.02	1417.18	1342.35	1330.67	1974.11	1789.18	1684.42	1822.61	1747.12	1752.73	1402.15	1156.59	1343.54	1511.35	1534.43	1569.49	1090.82	983.169	792.026	1479.56	1436.58	1449.6	2644.13	1592.26	1563.46	1206.92	1390.01	1271	589.105	679.37	540.89	961.543	1219.48	997.325
CNAG_01464	163	76	297	52.6	FHB1	554.536	512.823	558.275	214.319	214.044	214.055	473.502	540.362	465.113	234.289	245.004	236.049	445.146	393.403	414.225	197.081	219.864	182.132	1255.11	1373.98	2441.03	508.71	488.535	456.005	250.487	276.796	272.364	172.361	215.907	181.476	3671.39	3414.04	3320.47	816.857	877.793	1095.8
CNAG_01469	199.67	161	242	14.18		1506.86	1533.05	1536.1	1376.08	1474.13	1457.49	878.908	979.656	943.592	1072.03	861.123	895.122	1671.01	1426.4	1304.14	1366.09	1290.42	1434.09	1382.49	1240.14	1166.03	1469.49	1514.36	1513.34	882.646	1907.1	1758.78	1692.8	1816.14	1649.05	757.952	649.699	800.821	892.488	901.855	956.576
CNAG_01477	630.17	507	804	21.22		3588.08	3524.28	3452.29	4607.48	4403.46	4305.24	4142.33	4073.89	4203.23	4151.15	4073.37	3954.53	3309.76	3009.31	3035.3	4008.45	4143.78	4214.36	3346.8	3412.36	3513.03	4646.49	4417.21	4605.35	3529.81	4435.17	4761.41	5113.8	4956.69	4875.37	2532.5	2148.08	2486.18	2941.1	2802.76	2905.71
CNAG_01487	55	41	77	24.64		142.518	195.121	195.41	94.6372	102.343	114.684	33.8072	55.029	103.536	70.2856	65.9607	66.8052	128.278	69.6274	87.4598	97.9342	87.9681	52.2998	53.9015	94.4727	43.0261	90.6505	139.254	149.803	69.4003	74.1762	149.875	96.3385	131.567	94.5957	115.672	125.511	1	67.1229	151.117	100.857
CNAG_01542	1594.67	1033	2801	40.1		1564.21	1868.65	1897.69	7524.57	7769.55	8625.25	4061.65	4373.15	3705.72	7598.17	8292.73	8086.35	1549.38	1467.52	1498.81	6964.4	6889.42	6807.3	2017.02	2578.54	2365.03	3190.84	3268.1	3129.34	4425.37	5233.18	5496.34	7348.19	6971.97	6169.18	4893.05	4764.07	4372.77	8945.56	8279.31	8875.38
CNAG_01737	2355.67	1465	4013	39.2	ERG25	8757.17	8731.32	8811.24	9787.64	9339.64	8973.04	9505.4	10218.2	10216.8	9279.57	9831.72	10332.1	7397.04	7043.66	8221.82	8068.85	7625.84	8190.94	12070.7	11539.1	11896	10467.8	10641.1	11275.6	7118.62	11486.3	11167.2	12973.8	14702.4	13359.1	10220	11212.6	11910.8	9961.64	10151.3	9642.81
CNAG_01810	304.83	89	524	69.4		6.68809	37.0156	13.3405	47.4899	10.7227	48.0013	9.60378	14.7444	42.3667	17.0954	14.6174	31.0037	1	1	13.3003	26.4566	11.0286	1	211.046	288.541	273.026	134.723	130.449	117.308	316.337	67.9418	126.702	116.17	124.908	132.166	695.049	669.479	503.159	471.585	454.3	454.011
CNAG_01882	153.33	100	223	27.99		578.684	644.081	679.231	1512.68	1550.69	1632.7	1040.26	1000.76	976.215	1287.75	1433.8	1446.79	617.983	575.849	599.623	1317.67	1420.12	1382.16	586.05	779.733	529.026	1030.02	1079.96	990.921	694.974	713.207	871.565	925.971	986.063	900.001	327.558	273.866	226.458	698.478	564.985	555.882
CNAG_01945	87.67	70	115	19.35		68.5663	114.577	99.919	55.9522	73.4761	36.2337	41.875	39.6825	70.9122	27.438	9.35146	22.867	89.8701	49.0702	15.6178	24.1508	30.8131	13.35	89.6162	185.484	134.026	173.759	165.671	147.303	46.3529	33.6523	73.7335	1	1	1	13.0391	1	1	47.393	1	63.5038
CNAG_02045	75.5	31	107	39.29		62.5294	153.357	152.121	618.093	600.605	525.241	197.18	120.252	152.471	611.052	724.208	693.332	1	1	1	404.596	415.511	395.428	187.236	272.48	182.026	617.002	674.915	775.955	464.499	373.43	361.747	416.953	440.073	484.384	1	1	1	17.7983	6.74386	1
CNAG_02060	247.33	136	382	37.82		5.17887	7.18436	1	64.4145	50.8849	42.7713	66.0783	56.9473	60.0377	185.531	223.94	223.03	1	1	1	3.39926	6.63207	1	153.903	186.822	154.026	268.2	249.322	278.533	497.424	978.171	1143.03	3778.45	3651.65	3889.16	599.037	422.221	524.121	1487.67	1623.72	1374.25
CNAG_02095	524	352	724	27.37		774.883	733.574	670.318	525.007	584.289	537.009	511.824	555.709	535.798	532.745	537.266	483.405	717.205	655.508	537.051	572.915	615.553	538.244	1534.87	1626.94	1607.03	1400.23	1432.18	1535.84	1936.24	2452.62	2642.68	2482.77	2457.57	2717.45	1406.85	1431.03	1471.61	1477.81	1426.41	1530.45
CNAG_02288	71.17	58	91	19.6		445.872	644.081	759.443	979.556	1005.99	958.026	774.027	749.458	746.491	942.014	991.456	1057.86	496.357	293.187	344.7	838.074	872.751	873.954	475.335	486.624	389.026	1067.8	1169.48	1239.63	671.926	1068.57	1159.58	830.117	986.063	836.602	46.1463	1	12.6439	11.2216	45.2433	19.3595
CNAG_02455	568.83	241	1000	51.45		2380.7	2627.86	2652.71	3292.19	3104.47	3736.48	933.366	971.982	893.297	987.816	896.669	916.278	2845.66	2883.4	2942.6	3185.31	3104	3220.21	1625.35	1784.87	1588.03	2459.23	2490.29	2328.21	2255.61	3450.13	3847.71	3223.16	3480.75	3273.95	6071.67	6712.47	6418.68	5930.18	6489.08	7276
CNAG_02487	141.33	115	199	23	PHS1	731.115	894.663	888.037	931.2	972.105	870.423	1090.69	1102.43	1114.87	1160.68	1071.76	942.315	976.46	742.876	995.913	923.386	879.346	816.457	721.766	740.919	668.026	911.658	922.934	979.673	408.527	906.475	861.633	909.444	930.576	937.571	565.93	397.495	498.966	488.026	435.05	508.342
CNAG_02491	130.17	94	163	17.3		193.832	175.731	189.044	184.096	136.229	170.907	271.807	235.35	284.325	254.974	266.068	227.912	166.687	121.02	219.556	164.8	147.321	141.328	274.142	230.989	249.026	206.498	230.243	199.795	625.831	223.803	212.775	215.33	233.662	266.008	148.779	26.6081	79.7228	123.024	78.9303	121.231
CNAG_02532	477.5	229	801	47.28		5023.35	4881.61	4795.53	5739.02	5480.31	5366.94	5304.09	5409.04	4869.29	5166.2	4879.06	4906.52	5847.91	5607.23	5058.46	5723.92	5643	5562.76	2290.83	2039.17	1612.03	5021.73	5428.36	5353.99	5995.88	4709.49	5145.43	5517.04	5569.27	5401.35	734.777	432.112	519.928	1793.48	1667.03	1537.24
CNAG_02553	94.17	76	123	23.05		219.489	260.75	261.617	722.059	674.654	675.605	1	1	19.2583	64.3756	51.4793	99.352	166.687	200.68	161.619	517.577	554.002	497.44	209.856	281.849	243.026	506.191	409.286	495.999	530.349	239.389	156.496	390.511	262.515	251.92	132.225	71.1146	71.3379	247.98	281.052	287.621
CNAG_02722	1138.5	668	1665	34.49		3944.25	3985.18	4127.09	1402.67	1501.74	1406.5	2411.79	2364.68	2690.31	1414.82	1543.07	1508.63	3207.34	3638.87	3438.54	1421.42	1472.88	1269.02	4732.53	5205.82	5169.03	3685.71	3557.21	3470.53	2410.36	2000.62	2046.79	1924.17	2000.36	1815.77	3330.39	3483.28	3630.71	1961.19	1695.91	2145.08
CNAG_02751	2179.67	587	4144	77.01		3680.14	3579.47	3733.67	268.72	285.583	302.965	334.332	273.717	292.48	82.1056	114.671	91.2153	2672.82	3790.48	3663.33	319.284	312.192	258.177	4428.95	5377.13	8483.03	615.743	652.902	527.244	362.432	201.982	196.222	76.5067	104.933	82.8551	7674.06	6099.27	6942.74	2194.66	1609.28	1934.54
CNAG_02781	74.17	61	103	20.33		30.8357	66.8468	32.4387	2.76038	14.4879	3.54605	1	1	1	15.6179	48.8463	16.3576	41.8598	5.38612	1	1	4.4338	1	26.5203	51.644	33.0261	81.836	68.8112	64.8161	52.9379	1	1	1	1	1	1	1	1	146.042	88.5551	73.6909
CNAG_02849	60.67	45	76	22.71		1	1	1	7.596	16.998	1	1	1	2.94656	8.23039	1	1	1	7.95577	1	1	8.83034	1	39.6157	12.8304	18.0261	22.6529	33.5897	6.07528	56.2304	1	1	1	27.2517	38.2408	22.9712	1	1	1	1	1
CNAG_02991	8417.5	6381	9704	14.34		17183.2	17046.8	17231	10861.1	10947.4	11340.9	16855.2	15965.5	15776.4	12423.7	12759.6	12219.8	18026.5	18537.7	17338.8	11873.3	12371.9	10843.2	16666	17267.5	17357	16158.2	15674.9	15329.9	27344.4	16629.8	15540.4	13717.5	12955.7	12765.1	12097.2	11820.8	12187.5	13315.7	12206.2	13806
CNAG_03050	135.83	91	168	25.41		290.422	287.598	260.344	512.918	447.486	467.711	376.688	281.39	364.524	504.672	488.555	483.405	173.088	162.135	154.667	342.342	389.131	402.847	274.142	281.849	225.026	494.858	528.159	548.49	296.582	304.851	222.706	324.405	289.149	312.971	135.536	81.0049	104.877	254.556	232.928	246.872
CNAG_03080	804.5	560	1372	38.52		1940	1810.48	1853.13	1596.1	1653.61	1683.69	1360.96	1209.85	1177.39	1482.78	1241.59	1399.6	2227.93	2084.23	1844.11	1649.69	1631.15	1537.95	2393.21	2466.12	2706.03	2416.42	2474.15	2450.69	2202.93	3708.86	3536.52	4224.67	4366.32	4506.71	2923.17	2721.72	2528.1	2523.49	2566.96	2715.55
CNAG_03129	465.5	352	713	28		865.436	896.155	823.104	1400.25	1331.05	1405.19	1423.48	1338.38	1272.55	1292.18	1252.12	1266.16	877.239	791.699	796.609	1250.8	1286.03	1276.43	1155.1	1191.96	1129.03	1495.93	1448.32	1327.12	1778.2	1358.47	1497.25	1405.24	1338.96	1301.53	1360.5	1411.25	1337.45	1441.64	1460.1	1561.01
CNAG_03159	359.17	219	462	25.23		269.293	317.429	294.72	294.107	343.316	317.348	306.095	329.348	435.208	303.731	379.286	315.789	269.109	295.757	265.906	270.864	288.011	315.674	413.429	534.806	501.026	549.004	456.248	426.01	1363.35	426.423	457.752	565.692	435.634	444.466	506.337	481.563	356.423	511.045	420.613	423.449
CNAG_03227	1069	619	1577	37.25		5171.25	5737.76	5728.79	10714.9	10717.7	11479.5	6945.89	6607.99	6910.98	13130	13700.9	13453.3	6616.07	6506.6	5844.09	10005.7	9573.51	10080.9	3261.08	3353.47	3291.03	5425.94	5469.45	5224.01	3269.7	2652.12	2662.55	4568.42	4461.75	4509.06	3787.27	3443.72	3597.17	6143.92	6498.71	6814.18
CNAG_03284	344.83	221	489	36.04		559.064	521.773	492.068	1050.88	1092.59	1083.55	866.807	924.025	1055.06	1218.31	1200.78	1258.02	669.194	578.418	608.893	1022.53	1042.02	1003.79	857.482	885.466	902.026	912.917	917.064	917.183	1551.02	1081.04	1242.34	1325.91	1190.25	1188.82	1012.88	1065.09	918.209	968.119	935.542	959.972
CNAG_03302	164.17	79	301	55.86		85.1677	78.7793	62.9958	157.5	182.667	147.372	19.6885	56.9473	58.6784	79.1506	80.4422	74.9419	73.8667	74.7667	115.27	194.775	142.925	111.652	446.763	344.753	435.026	198.943	192.087	233.54	217.562	223.803	302.158	254.993	253.638	254.268	595.727	427.166	348.039	412.395	358.051	420.054
CNAG_03346	230.17	96	423	61.64	BZP4	288.913	363.667	350.742	255.422	278.052	278.123	219.366	131.762	115.77	56.9881	62.0112	50.5318	278.711	156.996	119.905	199.386	252.838	202.534	2481.31	2222.53	2442.03	570.411	583.926	590.984	194.515	58.5901	113.46	1	1	7.71529	1006.26	1060.15	1090.1	412.395	459.112	586.443
CNAG_03358	1557.5	969	2430	33.67		8752.64	8744.75	8333.78	5798.25	5829.22	5886.02	8630.04	8040.96	7302.46	6478.22	6265.33	6018	9759.15	9461.7	9051.48	6258.85	6364.03	6030.16	6458.73	6268.51	6151.03	6649.9	6705.14	6672.53	4576.82	6922.72	7240.98	5457.55	5274.08	4945.81	8104.45	7666.89	7588.37	6962.71	7109.89	7204.69
CNAG_03369	118.17	76	148	26.17	SWE102	193.832	236.885	175.038	94.6372	88.5369	68.9214	100.366	131.762	104.895	114.611	118.62	99.352	105.874	92.7543	57.3325	47.2082	48.3992	20.769	742.004	596.372	698.026	384.047	445.975	422.26	168.175	551.112	629.898	592.135	650.923	742.677	330.869	273.866	289.344	274.286	300.302	253.664
CNAG_03385	4438.83	2205	8036	51.3	PCL103	4323.07	3883.75	3667.46	486.322	507.73	492.554	624.773	511.587	542.594	192.919	181.812	234.421	2554.4	2659.84	2585.71	393.068	426.502	413.976	10138.5	8836.89	10069	4766.11	4707.78	4844.07	7968.09	9999.42	9134.58	7225.89	8019.56	7425.43	19708.5	20361.1	21113.2	11247.4	9867.41	11751.5
CNAG_03474	64.5	29	122	61.24		2.16042	5.6928	1	13.6405	3.19228	1	1	1	1	1	6.71847	8.22088	1	1	1	1	1	1	21.7583	47.6288	42.0261	39.0227	43.8627	13.5741	1	1	1	1	1	1	132.225	31.5533	75.5304	34.2398	59.6806	32.9423
CNAG_03495	54.83	25	100	49.84		297.968	301.022	321.458	8.80491	1	1	1	1	20.6176	1	1	1	157.085	141.578	231.144	1	1	1	611.051	537.483	804.026	57.9109	35.0573	63.5663	1	1	1	1	1	1	171.954	90.8953	33.606	1	1	1
CNAG_03526	107.17	84	145	22.67		168.175	211.528	187.771	145.411	106.108	139.527	90.2817	95.3136	133.441	119.043	117.304	84.706	96.2715	149.287	152.349	81.7941	61.5889	61.5735	124.14	142.655	138.026	258.126	243.451	241.038	352.555	239.389	259.122	212.024	282.491	263.66	162.022	160.128	192.918	90.141	112.617	148.397
CNAG_03567	671.33	510	880	20.42	CBK1	3000.99	2975.39	2860.24	2036.14	2190.78	2239.38	2853.5	2548.84	2739.25	2372.24	2352.71	2418.31	2874.47	3024.73	2713.17	2124.67	2229.08	2200.1	2265.83	2729.78	2418.03	3194.61	3158.03	3130.59	2640.84	3163.35	2953.87	2879.41	2770.52	2564.82	2227.91	2340.94	2268.17	2349.21	2047.21	2206.2
CNAG_03819	776.5	666	857	8.14	ERG6	2158.84	2335.51	2105.23	1611.81	1662.39	1682.39	2268.59	2401.13	2680.79	1928.99	2005.16	1964.29	2147.91	2189.59	1936.81	1601.27	1703.7	1537.95	2683.69	2966.68	2648.03	2498.27	2468.28	2508.18	2910.82	2511.85	2367.91	1891.12	2055.85	2099.89	1744.55	1609.06	2020.82	2092.72	2292.65	2369.19
CNAG_03910	304	256	378	15.37	ITR6	420.215	494.925	484.429	163.545	178.902	174.829	126.587	149.026	126.644	51.078	51.4793	48.9044	499.558	537.304	442.035	180.941	261.632	187.696	1056.29	1189.28	1623.03	454.563	566.316	515.995	286.705	258.092	235.948	20.3164	47.2269	3.01905	757.952	852.45	855.323	816.857	574.61	583.048
CNAG_04096	112.33	89	153	22.88		711.495	757.439	781.088	851.412	796.395	840.351	1609.04	1547.48	1551.2	1134.09	1073.08	1096.91	569.973	442.227	379.463	602.889	670.51	577.194	402.715	487.962	327.026	1319.64	1485.01	1544.58	869.476	1296.13	1225.79	1001.99	1085.94	986.881	178.575	155.182	146.802	356.494	309.927	297.808
CNAG_04098	869.67	245	1600	70.38	PDR5-2	563.592	581.435	550.636	456.1	461.292	504.321	279.875	248.779	285.684	256.451	277.916	265.341	336.323	300.896	365.558	310.061	244.045	393.574	1709.87	1790.22	3026.03	638.409	649.967	692.218	546.812	547.994	573.62	466.533	579.9	608.834	3883.28	3933.29	4075.11	1773.75	1869.15	2114.51
CNAG_04213	679.5	509	947	24.03		6446.54	6201.64	6207.52	6783.51	6825.74	6743.74	7853.51	7553.71	6910.98	7695.69	7198.73	8042.41	6299.2	6555.43	5925.2	6494.03	6814.68	6644.08	3805.13	4195.33	3653.03	6376.65	6552.51	6223.85	3855.77	8599.78	8714.15	8947.96	8958.4	9595.09	2469.6	2518.97	2448.45	4447.15	4227.24	4199.48
CNAG_04216	32.5	21	41	23.41		1	14.6422	1	45.0721	45.8646	38.8487	1	1	1	21.5279	39.6308	4.9662	1	1	1	17.2336	1	1	3.90099	32.9064	29.0261	74.2807	84.9545	102.31	3.55051	1	1	26.9271	69.4216	42.9371	1	1	1	1	1	1
CNAG_04243	277.17	185	370	24.17	CDC24	525.861	612.758	558.275	373.894	389.753	386.646	247.604	306.328	319.667	182.576	121.253	177.464	451.548	395.973	518.511	360.788	285.813	334.222	887.244	947.033	794.026	929.287	1047.68	927.181	698.266	1155.85	1205.93	1765.52	1696.29	1750.02	1572.39	1658.51	1492.57	1273.93	1565.97	1601.76
CNAG_04256	397.33	344	492	14.65	LPI6	1473.65	1622.54	1571.75	1876.56	1924.7	1985.73	1699.81	1647.23	1748.31	1912.73	1941.97	1837.35	1402.15	1506.06	1369.03	1790.34	1837.79	1843.99	995.579	1167.87	980.026	1795.63	1809.34	1765.8	1353.47	1324.18	1344.97	1358.97	1323.42	1294.48	1188.35	1129.38	1165.56	1017.44	1036.6	1095.8
CNAG_04283	1507.33	975	2202	29.16		9158.62	8707.46	9329.43	7285.21	6995.18	6857.5	10517.9	10976	11954	10297.6	9775.11	10237.7	9675.93	10463.9	10873	7273.37	7236.75	7269.13	7724.23	6664.67	6966.03	6541.6	6204.7	6456.32	6051.86	6754.39	6592.12	5262.54	5578.15	5549.28	5750.53	5763	5701.78	8439.16	7822.13	7978.91
CNAG_04346	70.33	60	75	7.82		663.2	770.863	683.05	395.655	391.008	321.27	2054.79	2034.73	1959	1045.44	955.911	948.825	678.797	786.56	632.068	319.284	338.571	295.272	191.998	221.621	157.026	491.081	472.392	542.241	372.31	485.65	480.925	350.847	344.636	282.445	1	1	33.606	34.2398	78.9303	97.4609
CNAG_04355	143.67	56	290	66.77		20.2711	42.9818	20.9798	13.6405	40.8443	49.3088	1	14.7444	58.6784	6.75288	25.1494	21.2396	6.65224	1	27.2052	17.2336	4.4338	1	143.188	168.085	154.026	156.13	93.7598	123.557	161.59	148.99	186.291	228.551	175.956	179.128	377.219	254.086	197.111	280.863	208.866	124.627
CNAG_04417	564.5	348	912	39.27		489.64	427.805	471.697	649.525	672.143	669.067	33.8072	3.23455	43.726	88.0157	106.772	60.2958	515.561	491.05	523.146	660.533	688.096	629.127	631.289	619.125	786.026	1158.46	1179.76	1159.64	615.954	551.112	679.556	836.728	704.19	817.817	1787.59	1856.32	2020.82	2214.39	2201.21	2206.2
CNAG_04453	94.17	62	133	27.84	IPC1	1473.65	1567.36	1623.95	1935.8	1910.9	1841.9	1804.69	1990.61	2132.99	1677.81	1698.41	1821.08	1254.92	1143.74	1375.98	1582.82	1763.05	1751.25	688.432	856.022	741.026	1223.94	1234.06	1267.13	523.764	981.288	1037.09	1038.35	1061.52	1132.46	261.343	283.757	352.231	517.621	555.361	718.876
CNAG_04496	389.83	316	475	16.16		2767.06	2824.74	2645.07	3977.64	3802.28	3876.38	2956.36	3089.8	3282.97	2036.84	1984.09	2081.45	2644.02	2546.77	2822.09	3704.1	3996.49	3813.73	2164.64	2144.9	1987.03	2548.64	2807.29	2699.4	2927.28	3409.61	3483.55	3299.18	3542.89	3478.24	2459.67	2385.45	2549.07	2960.83	3284.01	3041.54
CNAG_04655	284.5	173	460	36.93		7545.26	7640.99	8065.14	9640.15	9851.71	9880.45	8783.33	9051.92	10055.1	9742.03	9559.2	10101	8462.87	8821.86	9012.08	10333.1	10272.6	10077.2	2828.93	3325.37	2665.03	5399.5	5180.34	5127.77	1988.92	2564.84	2579.79	2958.74	2905.9	3069.66	701.67	689.26	704.395	2543.22	2278.21	2090.74
CNAG_04804	1119.5	855	1733	28.59	SRE1	7198.14	7432.17	7628.42	9814.24	10218.2	10119.7	9346.06	8344.06	7437.03	8673.8	8965.46	9402.87	8136.4	8505.79	6933.3	10487.6	10261.6	9847.23	5950.4	6931.01	5989.03	9097.81	9427.47	9295.87	4524.14	7455.76	7313.81	7301.91	7171.73	7239.92	3376.74	3488.22	3676.83	6453.02	5622.85	6012.79
CNAG_04899	439.5	228	669	43.85		703.949	658.996	638.488	517.754	584.289	555.314	538.044	553.79	647.261	532.745	636.003	546.871	736.409	696.622	696.958	561.386	545.209	491.875	950.34	1030.01	1086.03	985.952	981.636	868.44	1294.21	1052.98	1043.71	1289.56	1068.18	1144.21	1489.62	1356.86	1341.65	1227.9	1185.79	1275.77
CNAG_04951	499	421	629	15.6		2988.91	2832.2	2721.46	4377.79	4434.84	4060.74	4402.52	4133.36	3995.25	3936.92	3924.61	4250.7	3056.91	3184.04	3218.38	4243.64	4451.54	4171.7	3433.7	3203.57	3190.03	3433.86	3664.34	3608.01	3490.3	5716.35	5493.03	4621.31	4492.83	4452.71	3495.92	3300.31	3270.16	4493.19	5098.29	4756.38
CNAG_05077	312.17	105	614	69.15	LPI11	806.577	760.423	717.427	225.199	224.084	283.353	241.553	246.86	247.623	287.479	280.549	306.025	611.582	740.306	516.194	266.253	279.218	228.501	1001.53	1272.26	1240.03	972.1	980.169	850.943	378.895	389.016	464.373	592.135	537.73	500.82	1446.58	1302.46	1421.3	415.684	319.552	443.824
CNAG_05159	4739.33	2628	8130	45.25		8622.85	9120.62	9195.75	9660.7	9886.85	10013.8	7815.19	7511.51	6356.38	7951.3	8111.06	7694.16	9986.39	9988.48	9640.12	10051.8	9674.63	9654.34	5950.4	5241.95	4615.03	7366.39	7022.13	7072.47	18211	6539.3	5986.29	5550.1	5409.47	4873.02	3701.19	3443.72	3597.17	8304.34	7711.44	7815.91
CNAG_05303	23.33	20	27	15.73	ICL1	157.61	241.359	336.736	332.792	353.356	391.876	388.79	415.672	452.879	670.153	718.942	738.898	61.0639	1	31.8402	298.533	257.235	337.931	218.189	228.313	149.026	373.974	416.624	487.25	115.495	429.54	477.615	393.816	295.808	390.459	1	1	1	1	1	1
CNAG_05333	18	12	33	43.18		376.448	433.771	401.67	268.72	274.287	240.205	1	1	1	1	1	1	397.136	413.961	395.685	282.393	345.166	306.4	349.143	367.506	303.026	690.036	661.707	635.977	773.993	909.592	994.054	906.139	815.163	881.216	1	1	1	1	1	1
CNAG_05387	206.17	143	308	29.6		141.009	192.138	153.394	353.343	314.449	280.738	148.773	170.128	157.908	226.901	194.977	183.974	105.874	77.3364	75.8723	275.476	217.666	237.775	1305.11	1194.64	1531.03	357.604	403.416	428.509	118.788	111.583	123.391	145.918	111.592	92.2476	446.744	422.221	599.585	261.133	136.679	304.599
CNAG_05451	337.67	305	383	9.33		1398.19	1440.57	1504.27	1476.42	1367.45	1486.26	1036.23	1163.81	1057.77	1253.77	1183.66	1240.12	1402.15	1395.57	1343.54	1460.62	1356.37	1374.74	1011.06	1078.2	969.026	1283.13	1329.45	1378.36	1702.48	1498.75	1503.87	1547.37	1529.83	1397.8	989.703	842.56	872.093	961.543	1089.54	1112.78
CNAG_05551	111	86	160	23.41		252.692	232.41	217.054	142.993	170.116	168.292	215.332	218.086	243.545	206.216	169.964	177.464	240.302	146.717	196.381	146.355	101.158	70.8473	346.762	285.864	310.026	373.974	354.986	372.268	520.472	289.265	288.916	297.962	335.758	301.23	155.4	105.731	138.417	123.024	151.117	206.124
CNAG_05558	325	245	406	18.23	KIN4	1544.59	1519.63	1463.53	1759.3	1844.38	1768.68	1849.06	1942.65	1555.28	1614.28	1631.27	1731.58	1536.58	1475.23	1677.25	1884.88	1752.06	1827.3	1432.49	1406.1	1231.03	1589.12	1693.41	1597.08	1132.88	1642.14	1699.19	1742.38	1833.9	1670.18	1466.45	1396.42	1345.84	1490.96	1455.28	1486.31
CNAG_05571	468.83	217	860	54.04		2344.48	2087.91	2510.11	2462.88	2360.21	2517.88	1937.81	2119.13	2218.63	1513.81	1465.39	1493.98	2653.62	2456.83	3035.3	2784.11	2448.91	2617.42	2724.17	2688.29	2456.03	2729.96	2797.01	2589.42	1972.46	3574.82	3589.49	3441.31	3458.55	3574.51	3449.57	3137.12	3454.63	2964.12	3370.63	3445.63
CNAG_05678	853.5	421	1675	58.93		767.337	881.239	1056.1	1281.78	1267.05	1324.13	1423.48	1434.3	1611.01	2112.2	2343.5	2257.21	730.008	755.724	847.594	1223.13	1081.59	1031.61	2517.02	2432.66	2864.03	2290.5	2526.98	2550.68	2170.01	2016.21	2321.57	2519.13	2282.23	2454.46	3413.15	3344.81	3316.28	2194.66	2384.08	2471.06
CNAG_05692	225.17	189	282	14.51	LCB3	872.982	930.461	899.496	839.323	832.792	819.43	1094.72	1037.21	1190.99	1169.55	1098.09	1059.48	925.249	794.269	701.593	796.571	707.881	738.557	958.674	834.607	898.026	965.804	1035.94	1017.17	731.191	1003.11	974.191	955.719	954.99	1092.55	777.817	887.067	805.014	737.938	921.105	902.245
CNAG_05755	783.17	367	1306	53.71		642.071	524.756	483.156	1546.53	1619.72	1708.54	810.332	787.824	887.86	1035.1	1065.18	1041.58	605.181	773.712	831.372	1905.63	1741.07	1808.75	1792.02	2029.8	2159.03	2029.84	1959.03	1827.04	1784.79	2430.8	2530.13	2443.11	2217.87	2334.7	4154.76	4126.15	4045.76	3690.84	3505.38	3656.17
CNAG_05757	632.67	332	987	43.1		383.994	242.851	284.535	1094.4	1029.84	1090.08	487.62	617.095	606.482	537.177	609.673	626.611	358.728	475.632	495.337	1070.95	1050.81	1100.23	693.194	904.204	1019.03	706.406	683.721	714.714	1853.93	1018.7	1235.72	1286.25	1048.21	1193.52	1718.06	1816.76	1547.07	1967.77	1657.41	1666.28
CNAG_05835	1968.17	1415	2432	20.38	LIV3	10269.4	9053.5	8592.25	23636.9	23185.6	22497.9	11478	12077.1	12443.4	27085	24991.2	26986.3	10213.6	10381.6	11591.4	24317.3	23543.5	25343.7	13339.8	10748.1	9580.03	17829.2	17684	18004.5	11649.1	17081.8	17228.8	22916.2	23338.3	23484.2	8094.52	7696.56	7525.48	14848.1	15921.4	15500.4
CNAG_05968	301.17	148	432	30.04	CDC420	115.352	107.119	69.3619	57.1611	52.1399	55.8463	60.0275	101.068	92.6613	120.521	143.634	143.29	29.057	28.513	31.8402	42.5967	30.8131	1	299.142	276.495	315.026	193.906	230.243	161.051	1011.05	311.085	371.679	704.515	633.167	730.936	291.14	328.263	197.111	106.583	184.804	206.124
CNAG_06092	3496.83	2826	4215	15.18	CLN1	5737.21	5721.35	5621.84	4845.63	4961.97	4651.73	6974.13	7135.52	6732.91	6495.95	6138.95	6022.88	5585.45	5530.14	4928.68	4933.05	5165.98	4778.2	8588.52	9196.92	8841.03	9620.38	10497.3	10355.7	10852.3	21277.5	21496	23785.5	25957.3	25585.8	16791.8	17661.1	17172.3	15841.1	17678	16665.1
CNAG_06125	17499.3	9554	28842	41.26	TEF1	84636.4	80576.8	82448.7	49330.9	47954.3	46447.5	64203	66092.9	69612	44959.8	43248.3	42955.4	74384.2	75658.5	83083.5	48492.9	48271.9	49310.7	84687	76778	78482	60734.4	59889.7	60554.1	64855.8	83447.5	81922.6	70562.2	69026.1	72212.4	107304	115991	113326	82130.1	86423.5	83227.9
CNAG_06165	302.67	257	364	14.88		1570.24	1539.02	1557.75	1267.28	1315.99	1263.98	1360.96	1319.2	1208.66	1157.73	1117.84	1101.79	1587.79	1362.16	1417.69	1262.33	1301.41	1189.26	1156.29	1202.67	1218.03	1686.07	1643.51	1638.32	1373.23	1205.73	1139.72	1154.04	1119.23	1162.99	949.974	679.37	792.436	1109.52	1051.04	1065.24
CNAG_06169	431	153	896	67.63		2099.98	2084.93	2231.28	608.422	659.593	693.91	620.739	655.461	523.564	379.084	352.957	307.652	1651.81	1734.76	1793.13	676.673	721.07	599.451	1924.16	1909.34	2718.03	635.89	680.786	655.973	530.349	404.602	358.437	350.847	289.149	289.49	2088.86	1871.15	1853.12	846.452	877.793	953.18
CNAG_06182	119.5	81	161	28.46		459.455	478.518	458.965	194.976	254.206	194.442	356.519	402.244	535.798	321.461	341.108	312.534	339.524	393.403	439.717	222.444	178.097	180.277	408.667	504.023	463.026	560.337	573.653	597.233	438.159	629.042	692.798	572.303	562.144	533.694	459.987	352.989	360.616	359.782	329.177	369.118
CNAG_06252	328.83	156	540	54.7	CCD6	492.658	526.248	572.281	487.531	485.138	529.164	425.095	459.793	639.105	284.524	322.677	306.025	646.79	742.876	752.577	625.947	593.571	577.194	753.909	807.839	820.026	890.251	809.931	677.22	694.974	703.856	768.939	658.241	599.875	702.759	1145.31	1159.05	918.209	1139.11	993.292	1139.94
CNAG_06291	120.67	54	214	59.87	FPD1	24.7988	51.9312	48.9905	7.596	23.2734	1	1	1	1	2.32037	17.2504	3.33885	1	1	1	1	1	1	95.5687	130.609	201.026	28.949	39.46	14.8239	1	1	1	1	1	1	400.394	263.976	381.578	53.9696	16.3687	70.2952
CNAG_06373	126.17	83	183	32.71		688.857	656.013	721.247	546.768	576.758	550.084	1425.5	1422.79	1499.55	850.408	791.349	781.208	707.603	688.913	729.402	556.775	527.622	592.032	337.238	486.624	345.026	759.293	792.321	868.44	688.389	510.588	547.136	542.555	511.096	524.302	234.858	273.866	171.956	251.268	242.553	145.001
CNAG_06499	719.17	552	908	20.76	DPP101	5870.02	5898.85	5912.13	6938.25	7030.32	7244.52	7514.67	7427.1	8184.66	9477.56	10429.4	10029.4	6456.04	6411.53	6569.46	6443.31	6350.84	6588.44	4683.72	4968.92	4585.03	6107.18	5969.89	5910.15	2239.15	2112.84	2437.43	3014.93	2810.47	2914.69	2439.8	2365.67	2305.9	3533	3336.94	3214.72
CNAG_06529	88	51	114	32.68		5785.5	6335.88	6388.31	1535.65	1486.68	1406.5	6500.14	6989.73	6429.78	1868.41	1860.34	1681.13	5342.2	5291.16	4812.81	1518.26	1631.15	1330.22	1264.63	1300.37	824.026	2719.89	2860.12	2911.87	1784.79	2499.38	2503.64	1249.89	1292.35	1198.21	13.0391	1	1	83.5644	54.8681	26.1509
CNAG_06534	221	159	313	24.62	HMG1	1610.99	1686.68	1700.35	1474	1489.19	1367.28	1135.06	1234.79	1267.11	956.789	1029.63	1026.94	1597.39	1498.35	1304.14	1126.29	1294.82	1102.09	2411.07	2083.33	1958.03	1736.44	1832.82	1935.77	569.859	1321.07	1427.73	1206.92	1403.32	1573.91	956.596	1025.53	1064.94	1563.3	1609.28	1642.51
CNAG_06583	56	47	65	11.63		616.414	855.882	1085.39	512.918	534.086	480.786	1713.92	1956.08	1912.78	775.055	824.262	854.439	502.759	329.162	344.7	319.284	362.752	285.998	387.239	372.86	299.026	535.153	604.472	684.719	309.752	479.415	507.41	301.268	351.294	317.667	1	1	1	1	1	1
CNAG_06699	12932.5	7570	20862	37.84	GPD1	26821.1	26542.1	25112.2	8918.44	8946.81	9241.08	15572.4	15154.1	14316.5	10693.5	10723	10317.4	24079	23882.6	23867.1	10012.6	11573.9	9969.65	47114	46147.4	52423	24722.1	24384.9	23716.1	18079.3	14962	14692.9	13350.6	12749.3	13396.7	61443.6	61435.6	60807.1	38553.5	39954.7	42459
CNAG_06746	5474.17	4503	6406	14.38	H2B	15791.7	15676	14300.1	12519.8	12625.4	12831.5	16508.2	14877.8	14611.5	14148	14846.2	14561.5	15203.5	15446.4	14636.6	11744.2	12769.8	12035.8	24286.3	26495.7	25255	21703.8	20300.7	21005.3	20426.9	17112.9	16818.3	21746.1	19356.6	20943.6	10607.4	10629	10644.7	12536.4	11364.1	10963.7
CNAG_06829	429.5	283	636	28.76	ERG1	2413.9	2311.65	2093.77	2699.83	2722.92	2571.49	2476.33	2468.27	2691.67	2865.73	2863.51	2764.94	2320.75	2019.99	2136.11	2288.38	2391.76	2424.52	2225.35	2298.82	2152.03	2546.12	2480.02	2583.17	1781.5	2218.83	2275.22	2410.05	2464.23	2301.83	1473.07	1426.09	1400.34	2168.35	2244.52	2151.87
CNAG_06916	219.67	62	398	74.24		71.5847	62.3721	108.831	22.1029	28.2936	31.0037	17.6716	22.4177	85.8647	37.7805	40.9473	14.7303	86.6694	110.742	152.349	26.4566	1	7.78577	264.618	268.465	299.026	128.427	124.579	73.5647	201.1	117.817	173.049	112.865	113.811	108.684	711.602	644.754	431.887	481.45	516.861	484.572
CNAG_07316	313.5	215	472	29.98		3047.77	3137.97	3247.3	5515.37	5492.86	5425.78	4198.8	4114.18	4215.46	5619.79	6087.61	6050.54	2551.2	2451.69	2458.24	4441.93	4482.31	4583.45	2738.46	3022.89	2312.03	5422.16	5625.01	5767.67	3068.86	3671.45	3903.99	4135.43	4133.27	3999.52	711.602	679.37	578.622	1313.39	1103.98	1116.17
CNAG_07358	618.17	453	828	22.27		1203.5	1191.48	1151.59	1000.11	1021.05	880.883	4811.96	4762.57	4407.12	4445.18	4490.7	4525.72	5066.94	5229.49	4402.61	4165.24	4080.03	3893.49	1855.11	2047.2	1835.03	3213.5	3213.8	3134.34	4264.03	2848.51	2884.35	2519.13	2464.23	2466.2	1036.05	926.628	1014.64	2099.3	1893.22	1859.84
CNAG_07730	57.33	45	66	13.54		73.0939	141.425	87.1868	100.682	69.7109	75.4589	53.9766	81.8854	53.2412	124.953	134.418	97.7247	77.0674	51.6398	36.4751	74.8769	63.7871	44.8808	53.9015	79.7503	52.0261	142.278	87.8896	156.052	112.203	83.5279	113.46	102.949	116.03	115.729	1	1	1	1	1	1
CNAG_07749	293.17	256	335	11.79		1242.74	1187.01	1119.76	1085.94	1144.05	1172.46	1421.47	1344.14	1507.71	1315.82	1323.21	1251.51	1302.93	1192.57	1192.9	1103.23	1145.34	1118.78	1006.29	985.846	920.026	1469.49	1540.78	1494.59	1495.05	1495.63	1563.46	1534.15	1392.23	1433.02	711.602	610.137	654.086	925.371	839.294	786.79
CNAG_07799	1048.33	199	2602	87.64		23660.7	25941	26125.7	78171.8	79052.4	80871.5	36052.5	35279.1	35130.3	59733.4	61035.5	61681.2	30256.3	27508.4	27176.5	81155.9	78223.3	82685.1	11748.1	12592.4	8914.03	27664.9	29809	28796.6	10256.4	12870.4	13633.6	20536.4	21243.2	21490.7	2886.75	2504.13	2691.61	25439.7	25387.5	24390.4
CNAG_07873	595.17	333	1001	44.2		1357.44	1336.17	1258.54	1380.91	1342.35	1449.65	1623.16	1652.98	1828.5	1459.14	1502.26	1453.3	1178.1	1172.01	1338.9	1218.52	1187.1	1274.58	1561.06	1716.61	1882.03	1436.75	1543.71	1429.6	1221.77	1679.55	1738.92	2010.11	2115.77	1846.29	3416.46	3537.67	3374.98	2322.9	2692.08	2878.55
CNAG_07902	835.5	436	1365	42.2		5614.96	5351.45	5349.37	2202.97	2335.11	2324.37	2462.21	2343.58	2554.38	1527.11	1518.05	1459.81	5409.41	6254.78	5440.84	2246.88	2521.45	2166.71	5281.34	5375.79	5039.03	4977.66	5120.17	4931.55	2871.31	3256.86	3129.33	2145.63	2142.41	1966.05	3068.84	2672.27	3219.86	2806.28	2345.58	2946.46
