# Supplementary material for: The fungal pathogen Cryptococcus neoformans adapts to the host environment through TOR-mediated remodeling of phospholipid asymmetry
Source: Research Square preprint supplement (doi:10.21203/rs.3.rs-2828872/v1), 2023-04-25
Supplement: Supplementary file 6 [file f0a66ab8f90552d517e9923e.xlsx]

## Sheet: Protein Kinase Competition
Plate	Well	CNAG_XXXXX	Gene Name	Ambient	5% CO2	Ratio CO2/Amb	CHI Test	t Test
3	B6	CNAG_06632	ABC1	91.032	90.946	0.999055	0.975988
3	G5	CNAG_06632	ABC1	78.188	79.041	1.01091	0.836359
4	D7	CNAG_02007	ADK1	35.582	39.518	1.11062	0.411007
5	E8	CNAG_02007	ADK1	17.662	19.244	1.08957	0.678255
1	B2	CNAG_01333	ALK1	32.849	37.65	1.14615	0.306677
1	C2	CNAG_01333	ALK1	21.482	24.901	1.15916	0.405134
1	F2	CNAG_02802	ARG2	58.153	52.73	0.906746	0.271632
1	G2	CNAG_02802	ARG2	43.466	46.184	1.06253	0.583485
4	D8	CNAG_05753	ARG5,6	37.591	41.788	1.11165	0.386211
1	B11	CNAG_05753	ARG5,6	26.645	18.783	0.704935	0.075351
1	G10	CNAG_05753	ARG5,6	47.366	44.992	0.94988	0.634459
3	B10	CNAG_03843	ARK1	14.032	40.613	2.89431	1.96037e-14
3	G9	CNAG_03843	ARK1	19.142	53.488	2.79427	2.54366e-18
3	C5	CNAG_05005	ATG1	63.179	68.831	1.08946	0.241262
3	D5	CNAG_05005	ATG1	84.366	84.519	1.00181	0.966397
2	E7	CNAG_04755	BCK1	60.644	70.865	1.16854	0.0364246
2	F7	CNAG_04755	BCK1	59.578	77.704	1.30424	0.0002211
4	B7	CNAG_03184	BUB1	65.839	69.775	1.05978	0.406571
4	G6	CNAG_03184	BUB1	58.198	48.217	0.828499	0.0430128
5	C7	CNAG_05200	BUD16	72.344	76.941	1.06354	0.304077
5	D7	CNAG_05200	BUD16	70.455	70.747	1.00414	0.94897
3	E11	CNAG_02712	BUD32	8.09	7.785	0.962299	0.910941
3	F11	CNAG_02712	BUD32	3.055	2.816	0.921768	0.889548
1	E8	CNAG_03567	CBK1	2.72	1.06	0.389706	0.307493	0.0226
1	F8	CNAG_03567	CBK1	1.99	0.338	0.169849	0.236848	0.0226
4	C2	CNAG_00415	CDC2801	57.356	56.165	0.979235	0.809694
4	D2	CNAG_00415	CDC2801	70.047	61.37	0.876126	0.0581818
3	F6	CNAG_00636	CDC7	2.484	1.286	0.517713	0.441455	0.0105
4	F8	CNAG_00636	CDC7	31.449	19.245	0.611943	0.00857869	0.0105
5	E4	CNAG_04191	CEX1	2.849	1.705	0.598456	0.491684	0.0215
5	F4	CNAG_04191	CEX1	2.463	1.144	0.464474	0.394771	0.0215
2	E11	CNAG_03167	CHK1	71.05	68.084	0.958255	0.513124
4	C11	CNAG_03167	CHK1	81.451	75.505	0.926999	0.126082
3	C10	CNAG_05694	CKA1	51.132	42.417	0.829559	0.0812556
3	D10	CNAG_05694	CKA1	32.926	14.1	0.428233	6.17544e-05
4	D11	CNAG_05694	CKA1	44.355	16.671	0.375854	2.51213e-08
1	C5	CNAG_04408	CKI1	65.781	61.702	0.937991	0.389929
1	D5	CNAG_04408	CKI1	63.409	51.071	0.805422	0.0104243
1	B7	CNAG_05097	CKY1	31.337	29.881	0.953537	0.753608
1	G6	CNAG_05097	CKY1	60.448	60.349	0.998362	0.983846
4	D6	CNAG_05439	CMK1	87.675	87.195	0.994525	0.883906
1	B6	CNAG_05439	CMK1	54.31	61.942	1.14053	0.125497
1	G5	CNAG_05439	CMK1	55.242	47.343	0.857011	0.112161
5	C5	CNAG_04272	CMK2	82.45	86.424	1.0482	0.296159
5	D5	CNAG_04272	CMK2	75.439	79.111	1.04868	0.393624
2	B6	CNAG_02511	CPK1	59.353	63.698	1.07321	0.376364
2	C6	CNAG_02511	CPK1	64.423	70.236	1.09023	0.224666
2	D6	CNAG_02531	CPK2	63.677	71.584	1.12417	0.100154
2	E6	CNAG_02531	CPK2	53.452	53.695	1.00455	0.961145
2	C10	CNAG_06193	CRK1	45.533	39.681	0.871478	0.239955
2	D10	CNAG_06193	CRK1	48.166	56.239	1.16761	0.106162
1	B10	CNAG_00826	DAK101	63.053	60.319	0.95664	0.571093
1	G9	CNAG_00826	DAK101	49.274	46.705	0.947863	0.607354
1	B9	CNAG_02551	DAK102	49.083	54.946	1.11945	0.240877
1	G8	CNAG_02551	DAK102	68.311	63.501	0.929587	0.30122
3	B4	CNAG_02799	DAK202A	87.455	87.765	1.00354	0.925434
3	G3	CNAG_02799	DAK202A	70.335	70.92	1.00832	0.898093
5	C3	CNAG_03796	ENV7	66.563	66.202	0.994577	0.939005
5	D3	CNAG_03796	ENV7	68.361	67.82	0.992086	0.907393
4	B9	CNAG_01209	FAB1	71.929	75.863	1.05469	0.381305
4	G4	CNAG_01209	FAB1	70.734	71.392	1.0093	0.88501
5	E2	CNAG_04221	FBP26	0.682	0.138	0.202346	0.508621	0.0198
5	F2	CNAG_04221	FBP26	0.15	0.06	0.4	0.816108	0.0198
3	C4	CNAG_04040	FPK1	81.649	84.268	1.03208	0.498662
3	D4	CNAG_04040	FPK1	77.452	73.957	0.954875	0.40297
5	B9	CNAG_05104	FRK101	73.352	76.48	1.04264	0.479254
5	G8	CNAG_05104	FRK101	82.94	85.761	1.03401	0.453286
5	B3	CNAG_01061	FRK102	76.799	77.705	1.0118	0.830053
5	G2	CNAG_01061	FRK102	18.967	6.11	0.322138	0.00103986
3	C6	CNAG_06051	GAL1	76.133	77.531	1.01836	0.742941
3	D6	CNAG_06051	GAL1	89.699	91.381	1.01875	0.58003
4	C4	CNAG_03946	GAL101	67.71	68.848	1.01681	0.807712
4	D4	CNAG_03946	GAL101	66.07	74.223	1.1234	0.0850765
1	C7	CNAG_06553	GAL83	53.277	49.969	0.937909	0.507314
1	D7	CNAG_06553	GAL83	51.322	54.158	1.05526	0.570444
1	E7	CNAG_06730	GSK3	2.129	0.411	0.193048	0.23398	0.0015
1	F7	CNAG_06730	GSK3	2.658	0.656	0.246802	0.213272	0.0015
1	C9	CNAG_01155	GUT1	62.429	53.01	0.849125	0.0517935
1	D9	CNAG_01155	GUT1	66.801	66.17	0.990554	0.89341
2	E3	CNAG_01523	HOG1	77.025	74.306	0.9647	0.518055
5	E10	CNAG_01523	HOG1	68.149	59.727	0.876418	0.0706548
5	F10	CNAG_01523	HOG1	83.043	93.961	1.13147	0.00362017
2	F4	CNAG_00130	HRK1	75.538	80.159	1.06117	0.282376
2	G4	CNAG_00130	HRK1	68.76	69.785	1.01491	0.82497
1	F4	CNAG_00745	HRK1/NPH1	55.27	53.126	0.961209	0.666322
1	G4	CNAG_00745	HRK1/NPH1	54.797	47.418	0.865339	0.13817
5	C9	CNAG_06366	HRR2502	78.99	81.465	1.03133	0.543491
5	F8	CNAG_06366	HRR2502	68.347	74.617	1.09174	0.177648
2	C11	CNAG_02675	HSL101	46.954	35.555	0.75723	0.022369
2	D11	CNAG_02675	HSL101	32.711	25.613	0.783009	0.130299
1	C11	CNAG_05600	IGI1	31.218	40.002	1.28138	0.0580097
1	D11	CNAG_05600	IGI1	74.242	82.768	1.11484	0.0512137
3	B9	CNAG_06809	IKS1	75.646	81.507	1.07748	0.172094
3	G8	CNAG_06809	IKS1	74.615	77.572	1.03963	0.496861
1	D3	CNAG_01294	IPK1	10.175	5.922	0.582015	0.159489	0.067
1	E3	CNAG_01294	IPK1	5.44	4.138	0.760662	0.565927	0.067
2	F6	CNAG_03670	IRE1	6.053	4.545	0.750867	0.527142	0.0017
2	G6	CNAG_03670	IRE1	19.939	15.366	0.77065	0.252391	0.0017
5	C10	CNAG_07359	IRK1	78.378	79.48	1.01406	0.788936
5	D10	CNAG_07359	IRK1	74.701	75.98	1.01712	0.768598
2	G11	CNAG_02542	IRK2	71.592	75.036	1.04811	0.445059
3	B2	CNAG_02542	IRK2	80.399	80.973	1.00714	0.885032
1	C10	CNAG_03048	IRK3	77.172	80.851	1.04767	0.380743
1	D10	CNAG_03048	IRK3	79.323	78.487	0.989461	0.836459
4	C6	CNAG_05965	IRK4	87.036	88.681	1.0189	0.624333
1	G7	CNAG_05965	IRK4	63.413	61.714	0.973207	0.724292
4	G5	CNAG_03811	IRK5	73.28	54.534	0.744187	2.27125e-05
5	B10	CNAG_03811	IRK5	78.01	79.455	1.01852	0.727177
4	G11	CNAG_01704	IRK6	77.825	79.247	1.01827	0.732124
5	B2	CNAG_01704	IRK6	67.224	62.006	0.922379	0.266293
4	B11	CNAG_06310	IRK7	18.222	4.948	0.27154	0.000584664
4	C5	CNAG_06310	IRK7	75.855	75.279	0.992407	0.892935
4	D5	CNAG_06310	IRK7	64.043	55.907	0.87296	0.0899913
4	G10	CNAG_06310	IRK7	74.267	78.398	1.05562	0.344681
4	B4	CNAG_00405	KIC1	64.005	76.302	1.19213	0.0104085
4	G3	CNAG_00405	KIC1	0.305	0.848	2.78033	0.324761	0.34
4	C9	CNAG_03290	KIC102	58.602	53.292	0.909389	0.281001	0.34
4	D9	CNAG_03290	KIC102	48.322	57.933	1.19889	0.0544445
4	B10	CNAG_01938	KIN1	73.978	77	1.04085	0.490969
4	G9	CNAG_01938	KIN1	66.062	70.477	1.06683	0.351119
4	B5	CNAG_05558	KIN4	61.194	63.648	1.0401	0.614555
4	G8	CNAG_05558	KIN4	68.92	69.963	1.01513	0.821702
3	B5	CNAG_01905	KSP1	67.367	58.718	0.871614	0.0650886
3	G4	CNAG_01905	KSP1	77.542	60.875	0.785058	6.49796e-05
5	D8	CNAG_01905	KSP1	59.291	56.905	0.959758	0.627209
4	E3	CNAG_01165	LCB5	55.171	62.115	1.12586	0.162628
4	F3	CNAG_01165	LCB5	76.315	73.634	0.964869	0.528301
5	D9	CNAG_01162	MAK3201	79.24	83.565	1.05458	0.286265
5	E9	CNAG_01162	MAK3201	84.399	83.029	0.983768	0.705764
3	E7	CNAG_06033	MAK3202	72.633	77.39	1.06549	0.285985
3	F7	CNAG_06033	MAK3202	60.023	61.216	1.01988	0.807584
4	C10	CNAG_02233	MEC1	51.521	51.658	1.00266	0.978131
4	D10	CNAG_02233	MEC1	67.396	66.712	0.989851	0.883988
4	E5	CNAG_02233	MEC1	45.326	44.739	0.987049	0.906134
4	F5	CNAG_02233	MEC1	43.212	15.581	0.360571	2.43522e-08
4	C7	CNAG_04215	MET3	0.313	0.478	1.52716	0.767698
5	C11	CNAG_04215	MET3	66.078	59.981	0.90773	0.197817
2	F5	CNAG_02357	MKK2	64.013	76.99	1.20272	0.00685607
2	G5	CNAG_02357	MKK2	53.191	74.312	1.39708	2.3077e-05
4	E11	CNAG_04514	MPK1	84.479	94.043	1.11321	0.00826069
4	F11	CNAG_04514	MPK1	67.242	88.634	1.31813	5.1648e-06
3	E8	CNAG_04282	MPK2	76.49	72.978	0.954086	0.407567
3	F8	CNAG_04282	MPK2	78.276	77.142	0.985513	0.783318
4	C3	CNAG_06697	MPS1	14.218	8.841	0.621817	0.123645
4	D3	CNAG_06697	MPS1	0.261	0.622	2.38314	0.479227
5	B4	CNAG_07372	OXK1	53.872	50.058	0.929203	0.444213
5	G3	CNAG_07372	OXK1	41.956	38.449	0.916412	0.477297
1	D4	CNAG_04821	PAN3	36.409	41.343	1.13552	0.30517
1	E4	CNAG_04821	PAN3	5.494	14.219	2.5881	0.000128637
5	F7	CNAG_00769	PBS2	62.702	64.406	1.02718	0.724569
5	G7	CNAG_00769	PBS2	47.003	62.619	1.33223	0.00175506
5	B8	CNAG_08022	PHO85	77.021	77.24	1.00284	0.958484
5	C8	CNAG_08022	PHO85	74.52	73.788	0.990177	0.866594
5	B5	CNAG_03137	PHO8501	77.478	75.897	0.979594	0.705076
5	G4	CNAG_03137	PHO8501	55.028	55.44	1.00749	0.933995
1	B8	CNAG_07744	PIK1	20.174	5.827	0.288837	0.000350042
1	D8	CNAG_07744	PIK1	27.914	7.955	0.284982	8.61071e-06
2	B5	CNAG_00396	PKA1	54.888	71.102	1.2954	0.00112039
2	C5	CNAG_00396	PKA1	57.518	67.228	1.16882	0.0494916
2	B7	CNAG_04162	PKA2	76.497	81.596	1.06666	0.229153
2	C7	CNAG_04162	PKA2	79.638	77.894	0.978101	0.664951
4	B6	CNAG_02820	PKH201	73.14	73.089	0.999303	0.990819
1	E5	CNAG_02820	PKH201	54.436	38.89	0.714417	0.00179927
1	F5	CNAG_02820	PKH201	61.052	56.658	0.928029	0.367541
5	E5	CNAG_02915	PKH202	1.151	0.293	0.254561	0.421175	0.484
5	F5	CNAG_02915	PKH202	0.725	0.766	1.05655	0.961455	0.484
2	D4	CNAG_00047	PKP1	68.862	70.309	1.02101	0.75467
2	E4	CNAG_00047	PKP1	78.762	78.857	1.00121	0.981469
3	E5	CNAG_04108	PKP2	69.525	68.122	0.97982	0.760518
3	F5	CNAG_04108	PKP2	70.53	73.22	1.03814	0.555169
4	E9	CNAG_02859	POS5	6.552	7.907	1.20681	0.583963	0.1588
4	F9	CNAG_02859	POS5	1.055	1.642	1.5564	0.565607	0.1588
5	E3	CNAG_05386	PRO1	56.481	61.442	1.08783	0.317
5	F3	CNAG_05386	PRO1	65.604	68.774	1.04832	0.504562
3	B3	CNAG_01062	PSK201	83.164	82.84	0.996104	0.930999
3	G2	CNAG_01062	PSK201	70.552	76.642	1.08632	0.181521
4	E7	CNAG_01612	PSK202	78.517	77.391	0.985659	0.783959
4	F7	CNAG_01612	PSK202	71.202	68.555	0.962824	0.558846
4	E4	CNAG_05216	RAD53	66.69	68.333	1.02464	0.727394
4	F4	CNAG_05216	RAD53	73.442	79.833	1.08702	0.147869
2	E9	CNAG_02296	RBK1	76.225	78.949	1.03574	0.522251
2	F9	CNAG_02296	RBK1	74.775	76.603	1.02445	0.673826
2	B10	CNAG_04631	RIK1	59.411	63.221	1.06413	0.437827
2	G9	CNAG_04631	RIK1	69.608	72.012	1.03454	0.601206
2	F8	CNAG_03024	RIM15	85.514	84.987	0.993837	0.880975
5	E7	CNAG_03024	RIM15	67.661	63.522	0.938827	0.376245
5	F9	CNAG_07667	SAT4	74.545	80.431	1.07896	0.176627
5	G9	CNAG_07667	SAT4	62.377	69.146	1.10852	0.162327
2	B8	CNAG_06301	SCH9	32.715	12.767	0.390249	2.12115e-05
2	G7	CNAG_06301	SCH9	57.503	18.509	0.321879	3.06778e-15
3	G11	CNAG_02947	SCY1	86.153	88.679	1.02932	0.464571
4	B2	CNAG_02947	SCY1	71.92	74.349	1.03377	0.588845
1	E9	CNAG_06568	SKS1	66.721	65.997	0.989149	0.877889
1	F9	CNAG_06568	SKS1	59.238	56.232	0.949256	0.540715
3	E10	CNAG_06552	SNF1	82.538	79.253	0.9602	0.38688
3	F10	CNAG_06552	SNF1	77.242	77.422	1.00233	0.965756
3	E4	CNAG_03216	SNF101	60.722	65.061	1.07146	0.374289
3	F4	CNAG_03216	SNF101	60.184	76.856	1.27702	0.00065972
5	B6	CNAG_06490	SNF102	42.012	45.795	1.09005	0.443412
5	G5	CNAG_06490	SNF102	76.665	79.555	1.0377	0.494433
3	B11	CNAG_00782	SPS1	73.251	70.361	0.960547	0.51383
3	G10	CNAG_00782	SPS1	80.94	79.614	0.983617	0.735666
5	B11	CNAG_05063	SSK2	83.373	91.027	1.0918	0.0398073
5	G10	CNAG_05063	SSK2	72.227	78.024	1.08026	0.195554
3	C9	CNAG_06086	SSN3	51.925	35.903	0.69144	0.00134231
3	D9	CNAG_06086	SSN3	71.731	59.693	0.832179	0.00751118
2	C8	CNAG_06980	STE11	72.385	79.702	1.10108	0.101719
2	D8	CNAG_06980	STE11	77.203	80.391	1.04129	0.447308
2	D5	CNAG_01730	STE7	74.768	79.245	1.05988	0.302658
2	E5	CNAG_01730	STE7	59.475	64.842	1.09024	0.274302
1	B3	CNAG_03369	SWE102	45.807	30.987	0.676469	0.00293488
1	C3	CNAG_03369	SWE102	55.169	38.934	0.705722	0.00109661
1	E11	CNAG_01850	TCO1	18.018	28.792	1.59796	0.00505878
1	F11	CNAG_01850	TCO1	25.826	33.275	1.28843	0.0887671
2	B2	CNAG_05590	TCO2	76.845	85.913	1.118	0.0315776
1	G11	CNAG_05590	TCO2	53.617	58.296	1.08727	0.348112
2	C2	CNAG_01988	TCO3	75.618	72.774	0.96239	0.507752
2	D2	CNAG_01988	TCO3	73.102	72.292	0.98892	0.855059
2	E2	CNAG_03355	TCO4	51.63	53.24	1.03118	0.747323
2	F2	CNAG_03355	TCO4	52.973	49.253	0.929776	0.456079
2	B3	CNAG_00106	TCO5	56.59	57.667	1.01903	0.827978
2	G2	CNAG_00106	TCO5	69.192	68.377	0.988221	0.859884
2	C3	CNAG_00363	TCO6	41.106	29.695	0.722401	0.020385
2	D3	CNAG_00363	TCO6	66.691	67.15	1.00688	0.92242
5	C6	CNAG_06278	TCO7	83.184	83.442	1.0031	0.945004
5	D6	CNAG_06278	TCO7	71.424	68.678	0.961554	0.543304
3	C7	CNAG_07779	TDA10	73.238	72.01	0.983233	0.78149
3	D7	CNAG_07779	TDA10	79.893	81.154	1.01578	0.75305
4	E10	CNAG_05771	TEL1	80.315	77.431	0.964091	0.468256
4	F10	CNAG_05771	TEL1	82.526	85.67	1.0381	0.407713
4	E2	CNAG_03592	THI20	55.164	55.628	1.00841	0.925666
4	F2	CNAG_03592	THI20	54.667	61.318	1.12166	0.181539
3	C11	CNAG_04230	THI6	87.38	89.279	1.02173	0.567417
3	D11	CNAG_04230	THI6	82.069	80.203	0.977263	0.626663
3	B7	CNAG_05220	TLK1	78.447	80.715	1.02891	0.581243
3	G6	CNAG_05220	TLK1	61.93	62.631	1.01132	0.885209
3	E3	CNAG_03258	TPK202A	55.682	60.656	1.08933	0.316688
3	F3	CNAG_03258	TPK202A	76.209	76.85	1.00841	0.88034
1	E10	CNAG_07580	TRM7	60.543	53.784	0.88836	0.166698
1	F10	CNAG_07580	TRM7	42.688	43.411	1.01694	0.883786
2	B9	CNAG_03367	URK1	70.419	67.907	0.964328	0.582054
2	G8	CNAG_03367	URK1	69.458	68.781	0.990253	0.883142
3	E9	CNAG_04316	UTR1	13.707	13.627	0.994164	0.981442
3	F9	CNAG_04316	UTR1	24.669	12.383	0.501966	0.00437165
2	C9	CNAG_02680	VPS15	13.646	3.46	0.253554	0.00300439
2	D9	CNAG_02680	VPS15	20.337	9.098	0.447362	0.00523412
1	D2	CNAG_06161	VRK1	50.534	42.974	0.850398	0.130512
1	E2	CNAG_06161	VRK1	35.87	32.197	0.897602	0.443786
5	E6	CNAG_05243	XKS1	66.705	70.171	1.05196	0.462059
5	F6	CNAG_05243	XKS1	67.243	65.44	0.973187	0.700855
3	C3	CNAG_04197	YAK1	1.09	1.034	0.948624	0.956989
3	D3	CNAG_04197	YAK1	74.942	74.347	0.992061	0.890791
4	E6	CNAG_04197	YAK1	50.752	47.228	0.930564	0.480885
4	B3	CNAG_04433	YAK103	61.392	77.006	1.25433	0.00134056
4	G2	CNAG_04433	YAK103	57.151	75.384	1.31903	0.000229173
5	B7	CNAG_00556	YCK2	35.031	24.577	0.701579	0.0284296
5	G6	CNAG_00556	YCK2	12.662	6.156	0.486179	0.0504161
5	C4	CNAG_04314	YEF1	80.399	81.943	1.0192	0.69732
5	D4	CNAG_04314	YEF1	64.742	67.439	1.04166	0.572418
5	C2	CNAG_00266	YFH7	24.479	17.065	0.697128	0.0846472
5	D2	CNAG_00266	YFH7	67.911	67.091	0.987925	0.860563
4	C8	CNAG_04927	YFH701	69.3	67.692	0.976797	0.727376
4	E8	CNAG_04927	YFH701	86.342	85.277	0.987665	0.756461
4	B8	CNAG_06671	YKL1	71.6	73.169	1.02191	0.727883
4	G7	CNAG_06671	YKL1	79.762	84.63	1.06103	0.225655
2	B11	CNAG_04678	YPK1	10.972	4.44	0.404666	0.0366205
2	G10	CNAG_04678	YPK1	31.033	22.012	0.709309	0.0511828
1	E6	CNAG_02389	YPK101	67.162	51.493	0.766698	0.000848404
1	F6	CNAG_02389	YPK101	53.12	54.77	1.03106	0.740913
